# Supplementary material for: On the challenges of global entity-aware deep learning models for groundwater level prediction
Source: Copernicus journal article supplement (doi:10.5194/hess-2023-192), 2023-08-30

## **Supplementary Material**

Predictions of groundwater levels in the test period (2012-2015) for all 108 considered wells, for all model variants, including NSE scores.

BB\_27381010

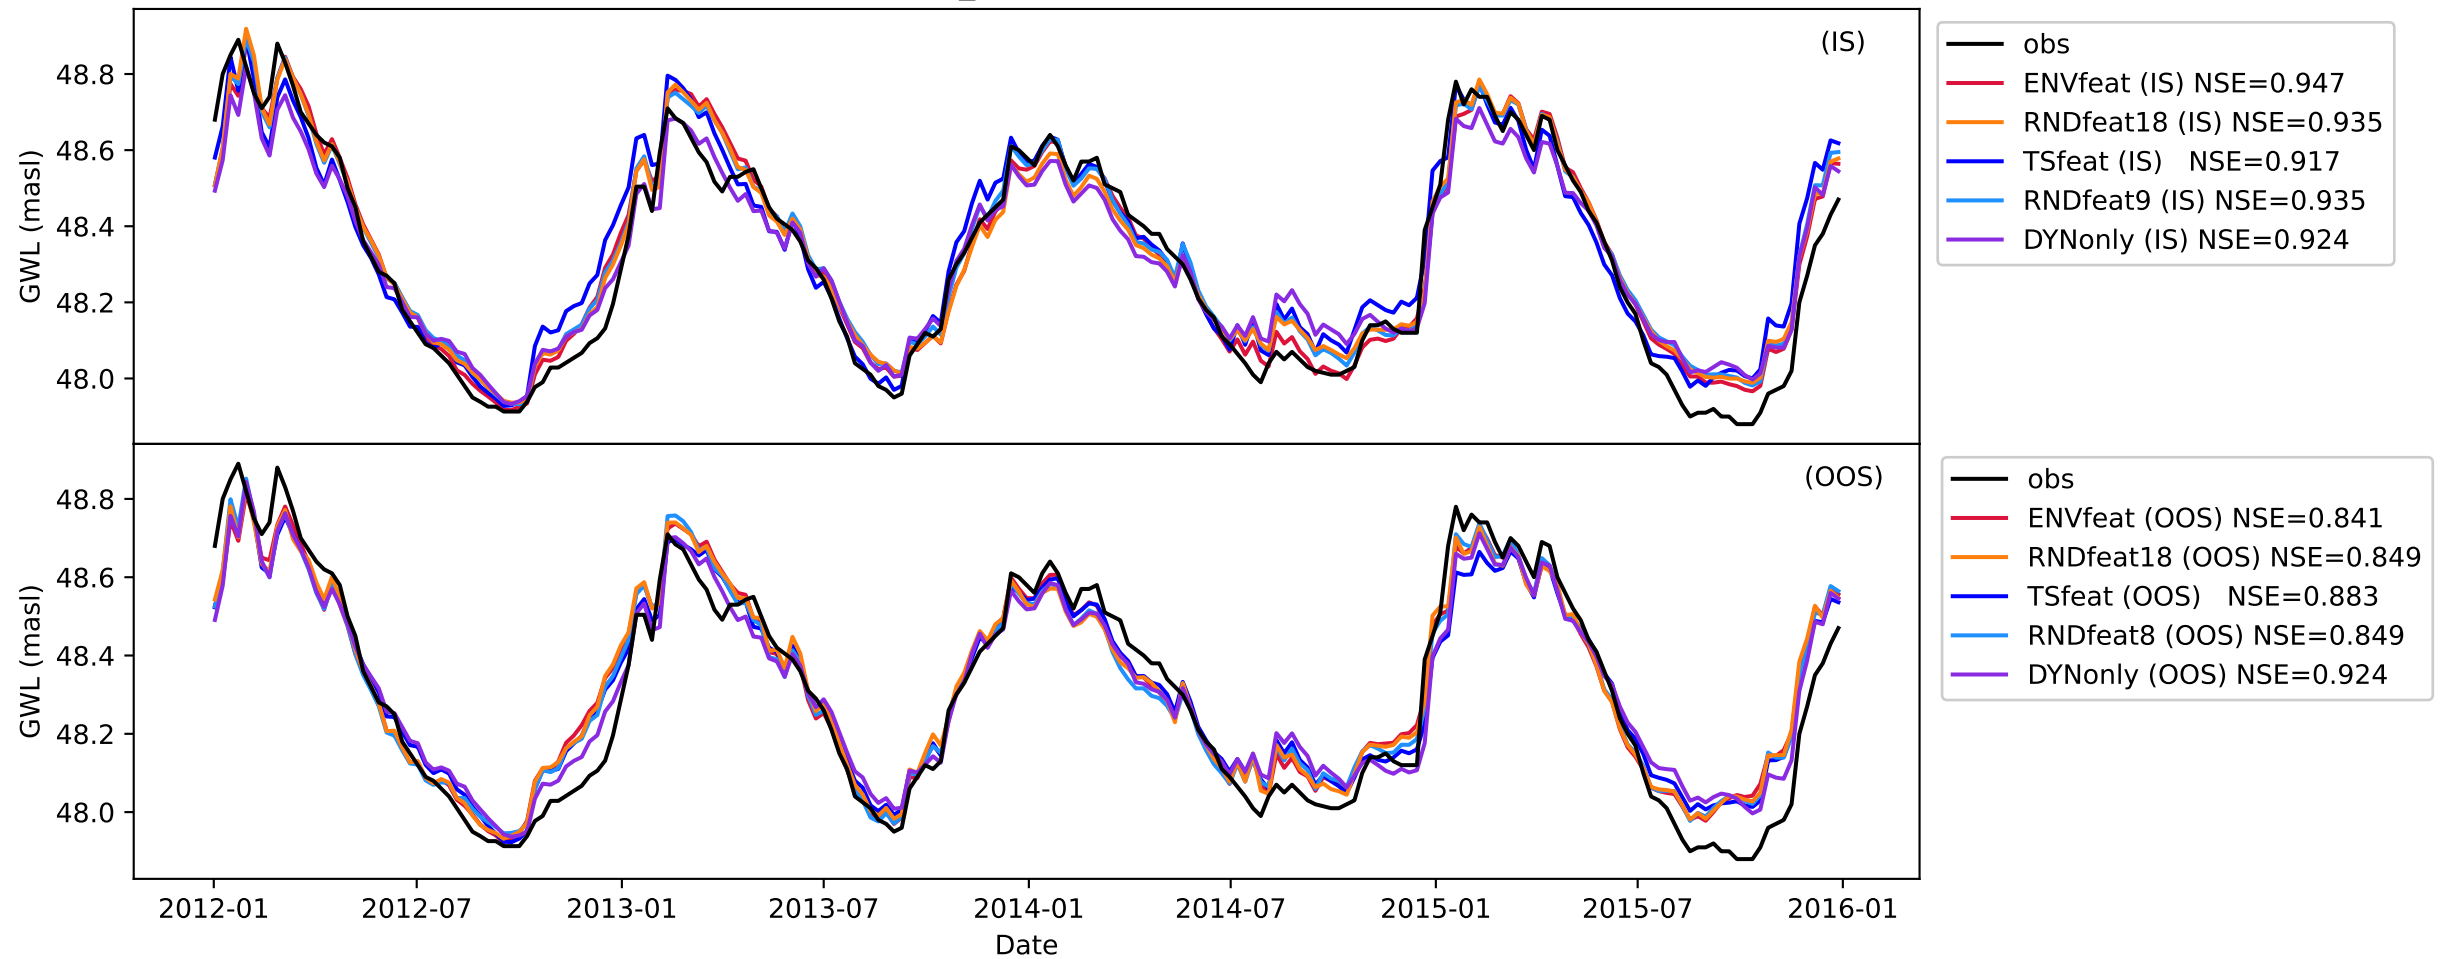

BB\_28390113

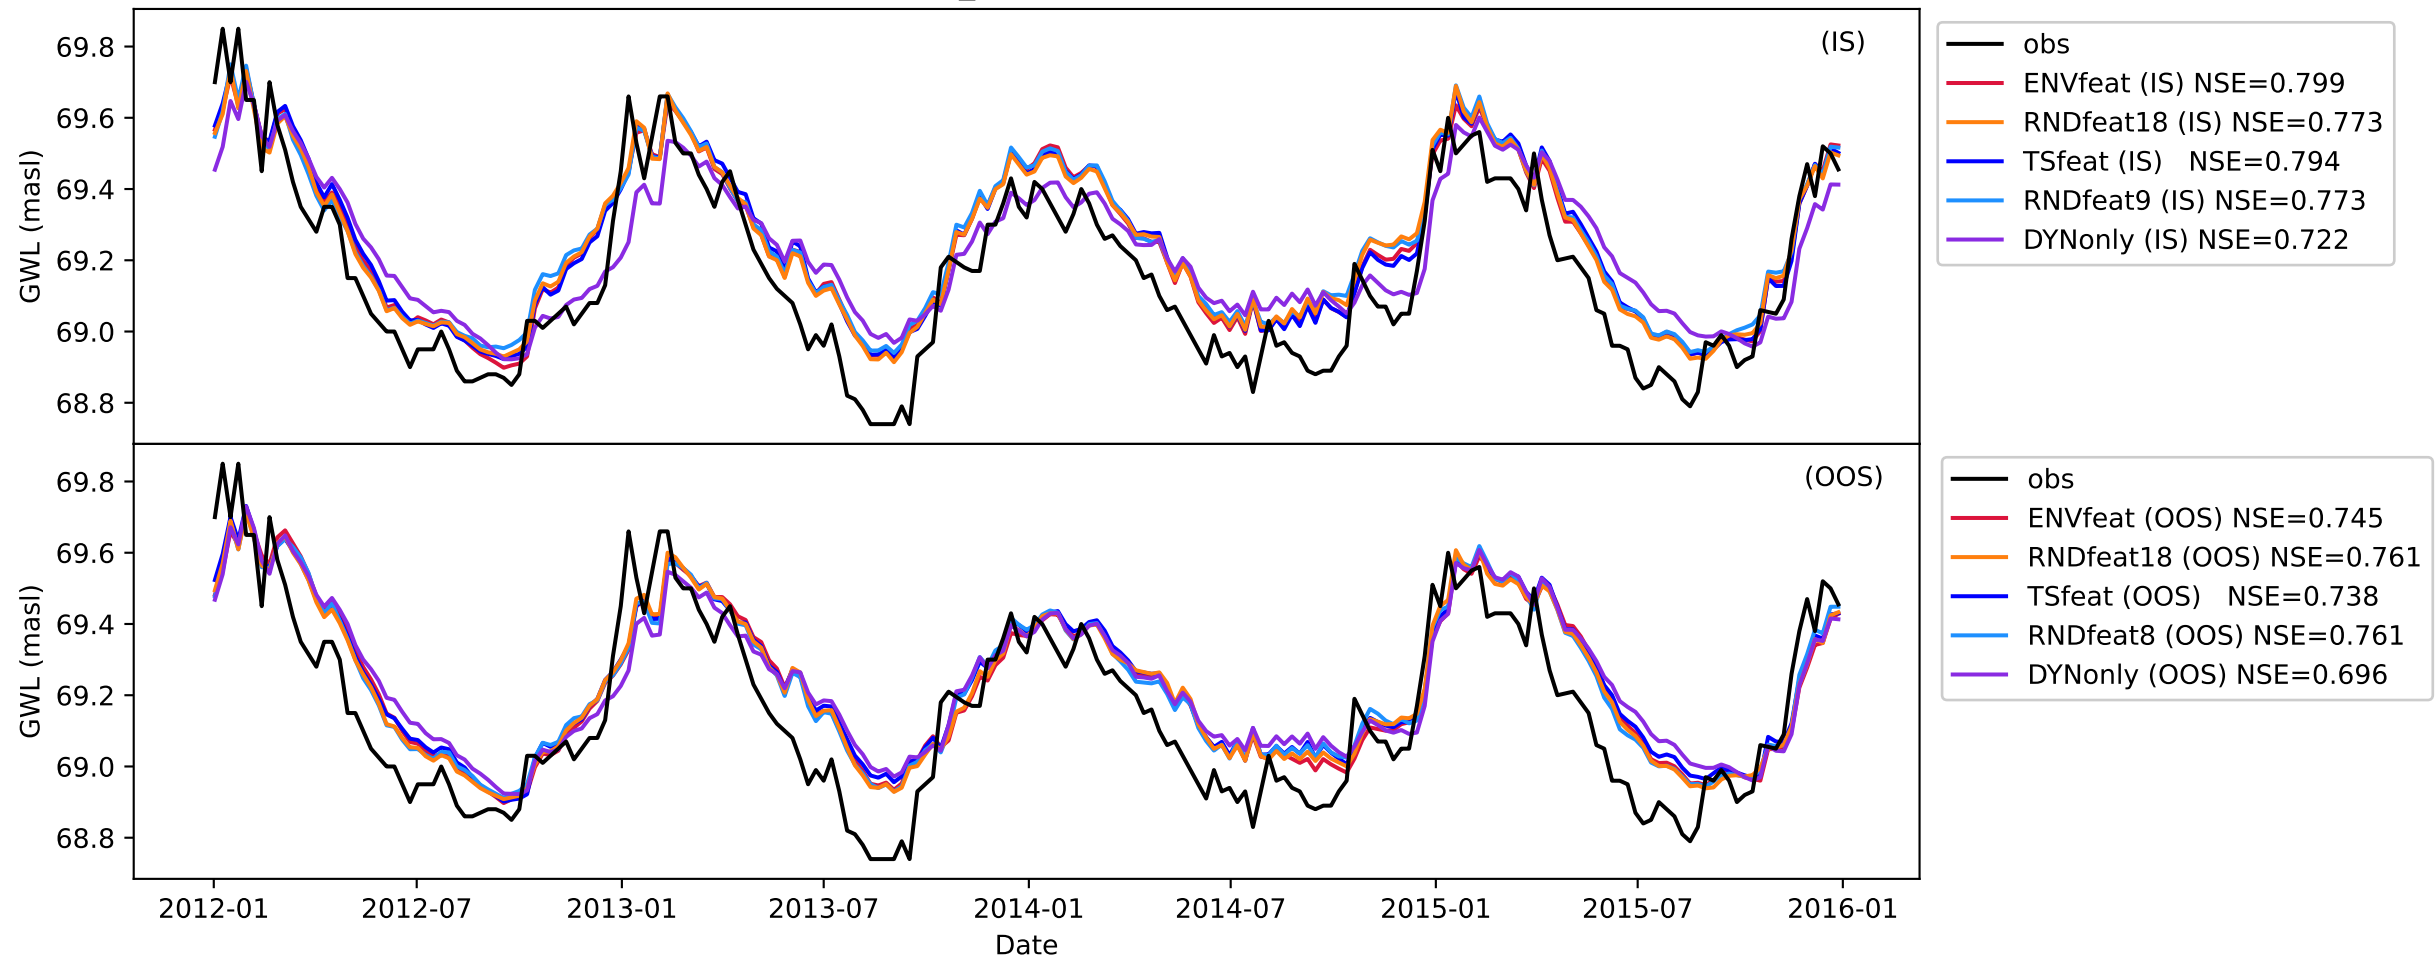

BB\_30400591

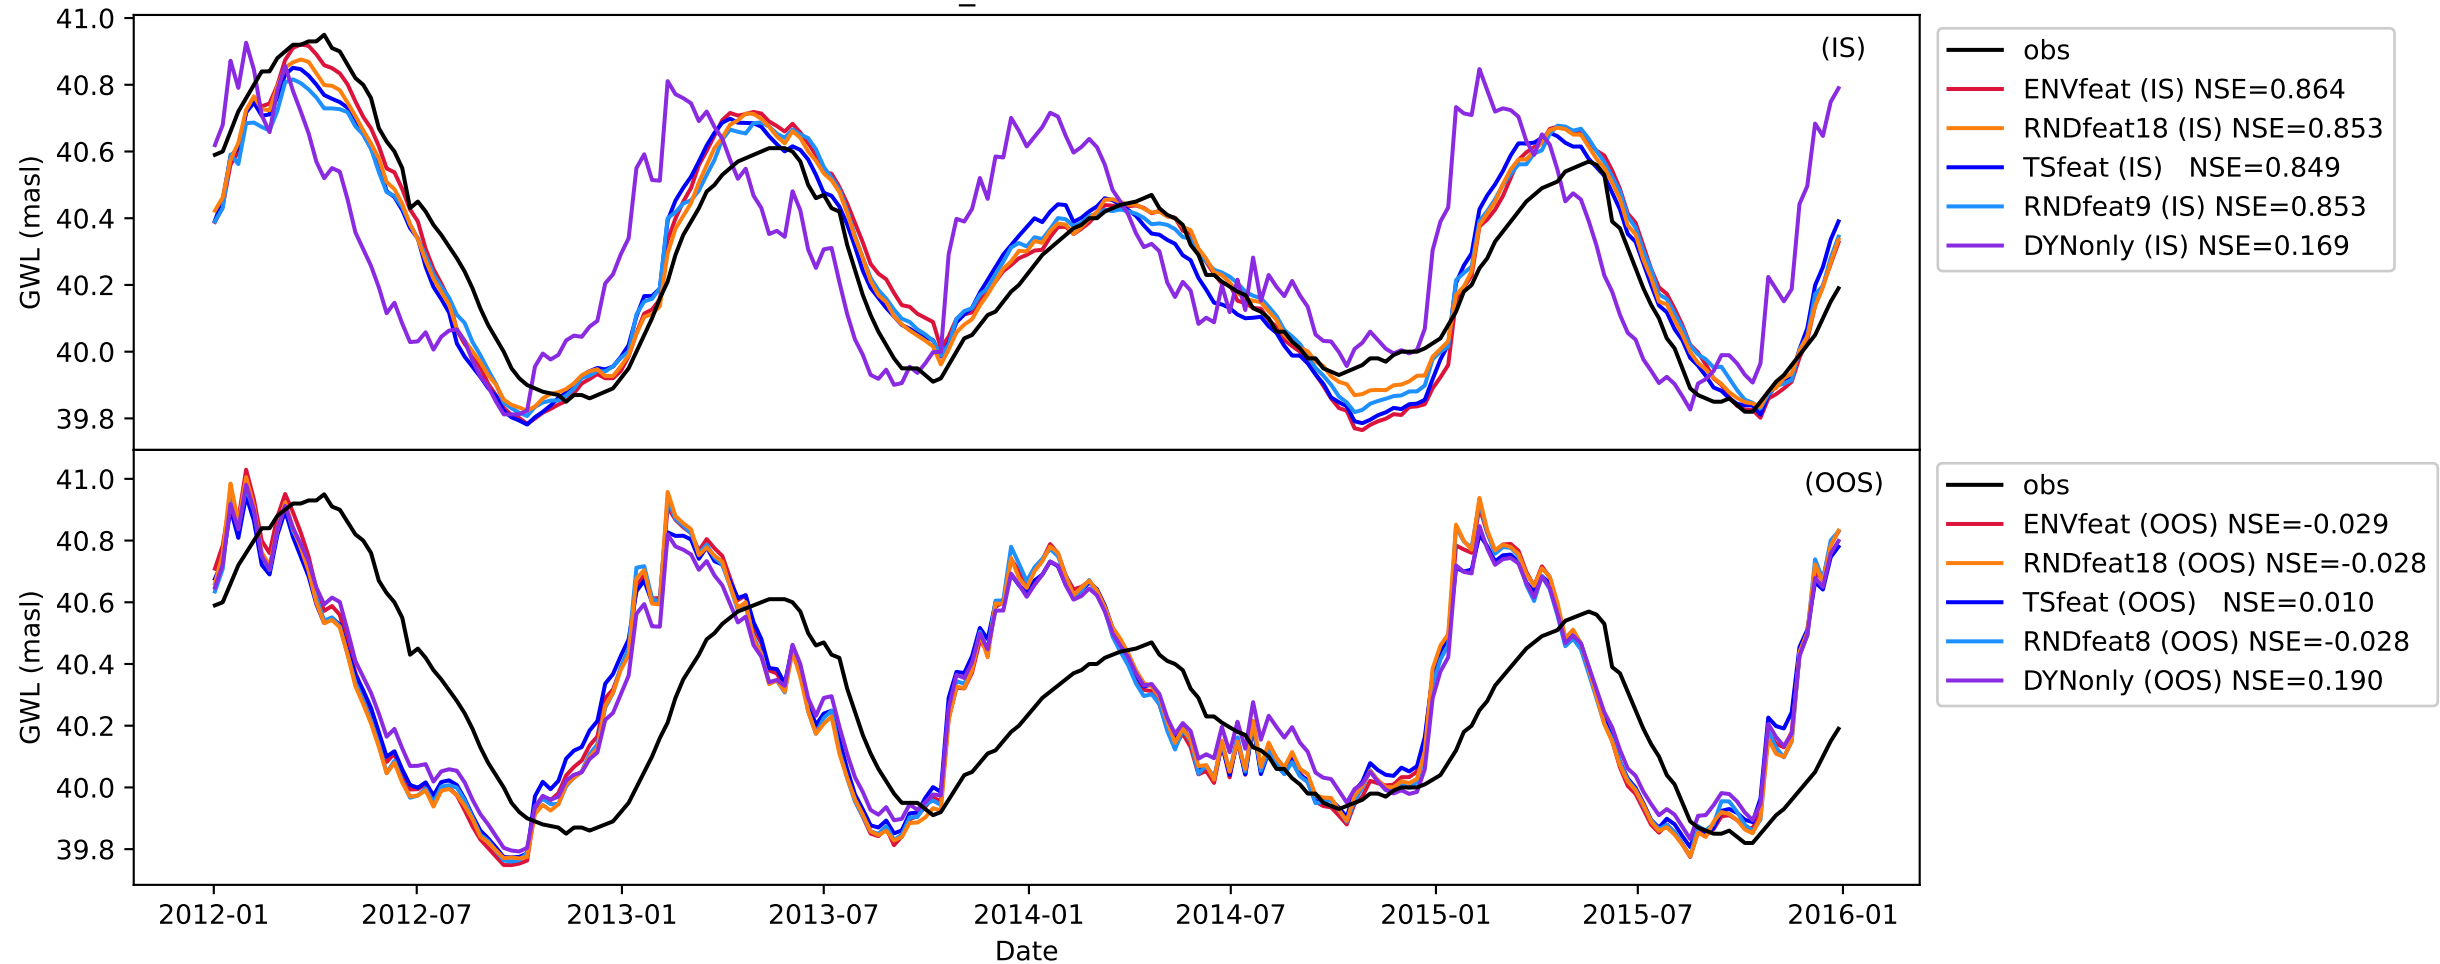

BB\_31400780

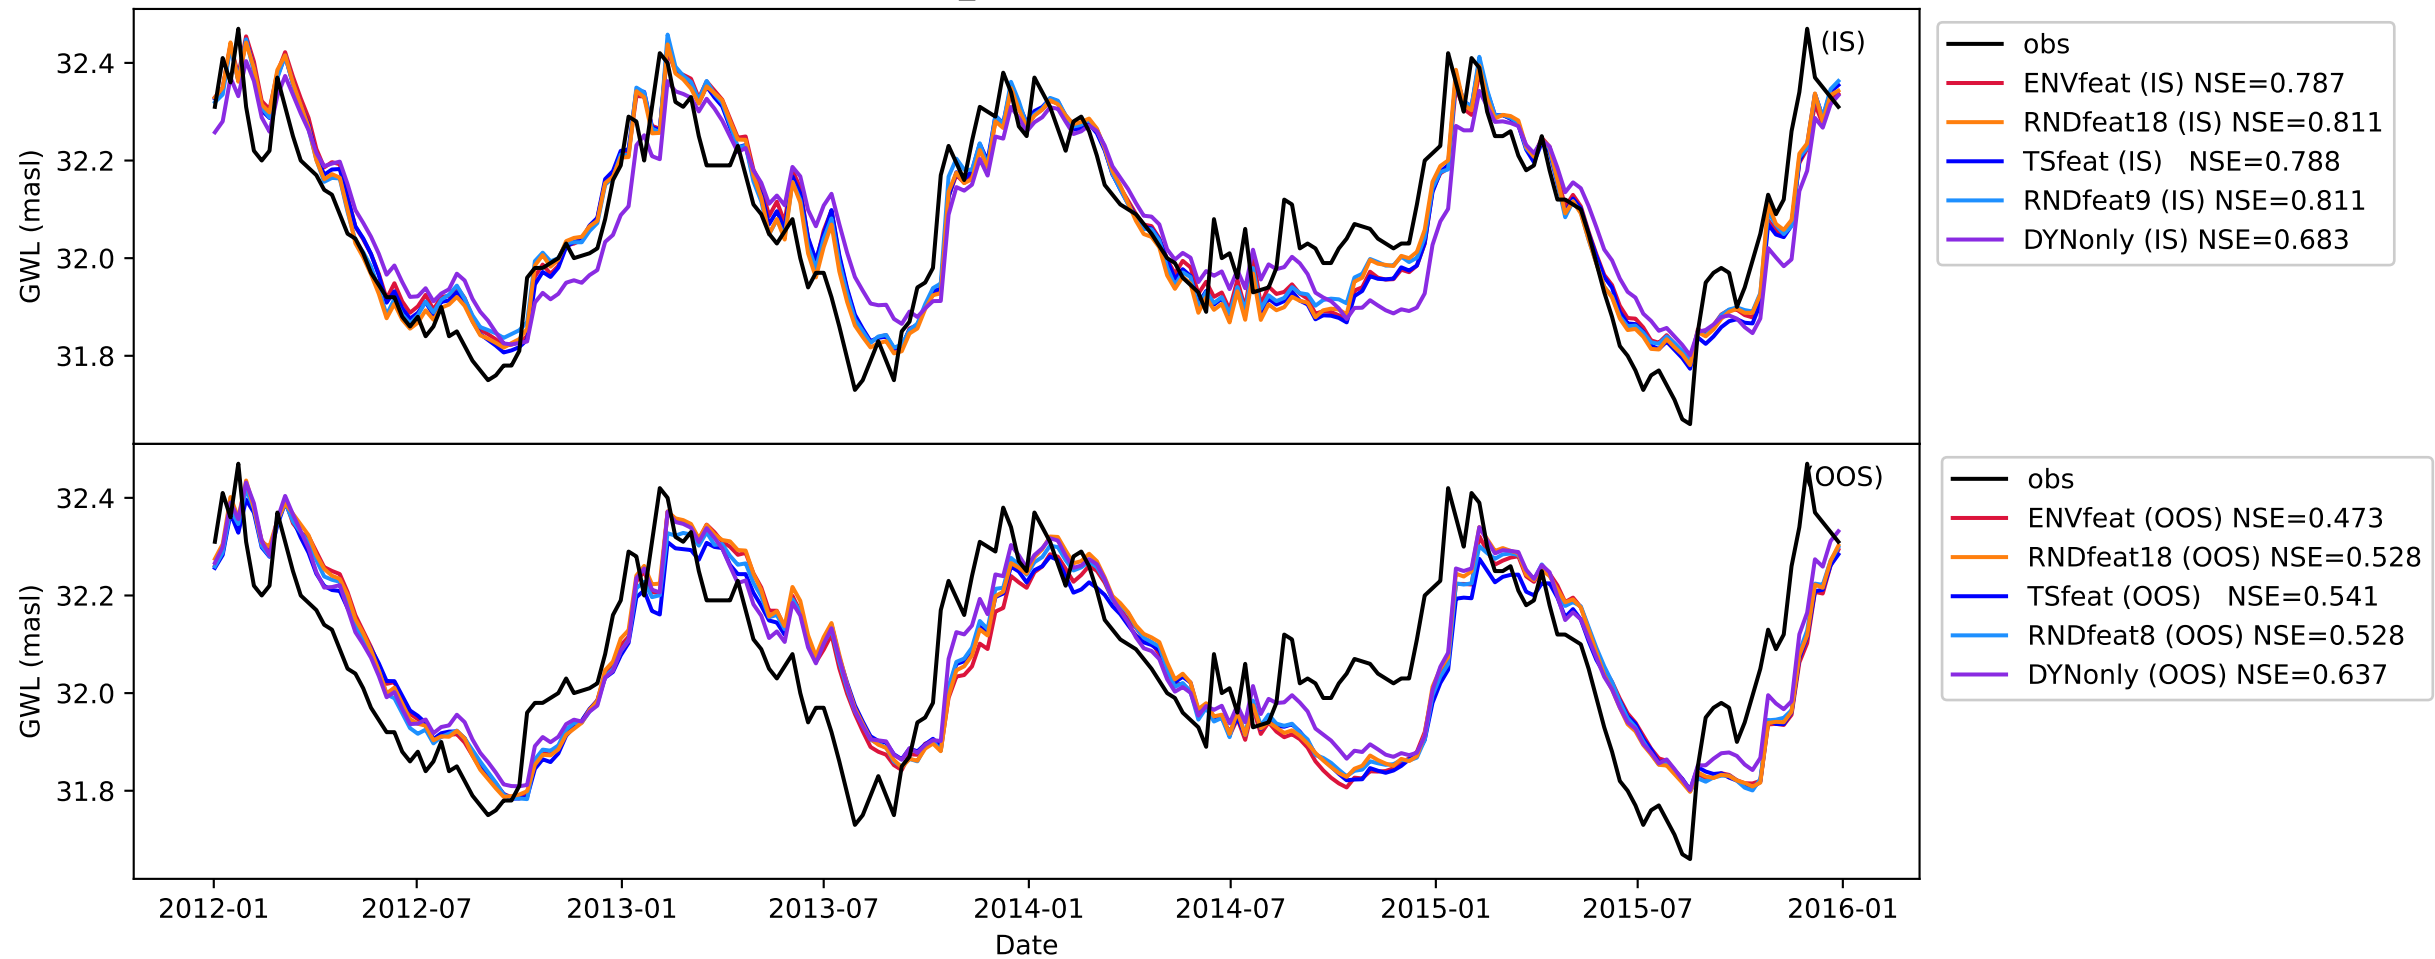

BB\_31491979

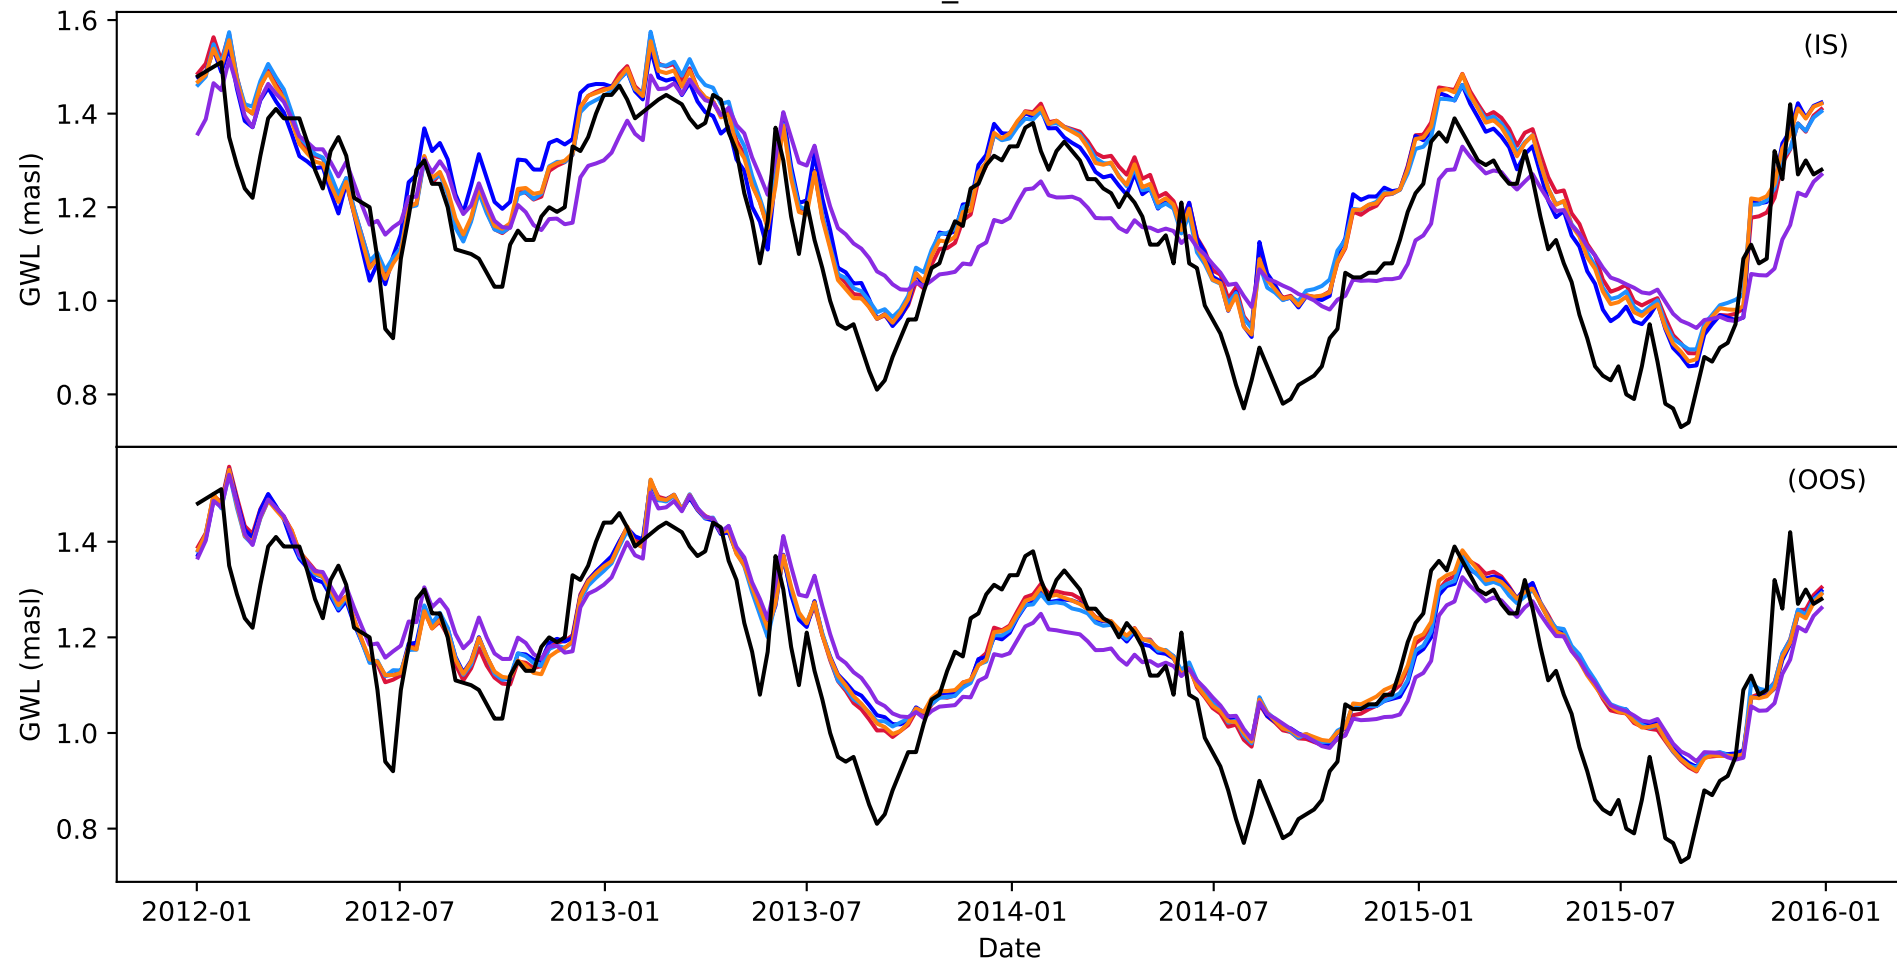

BB\_32455305

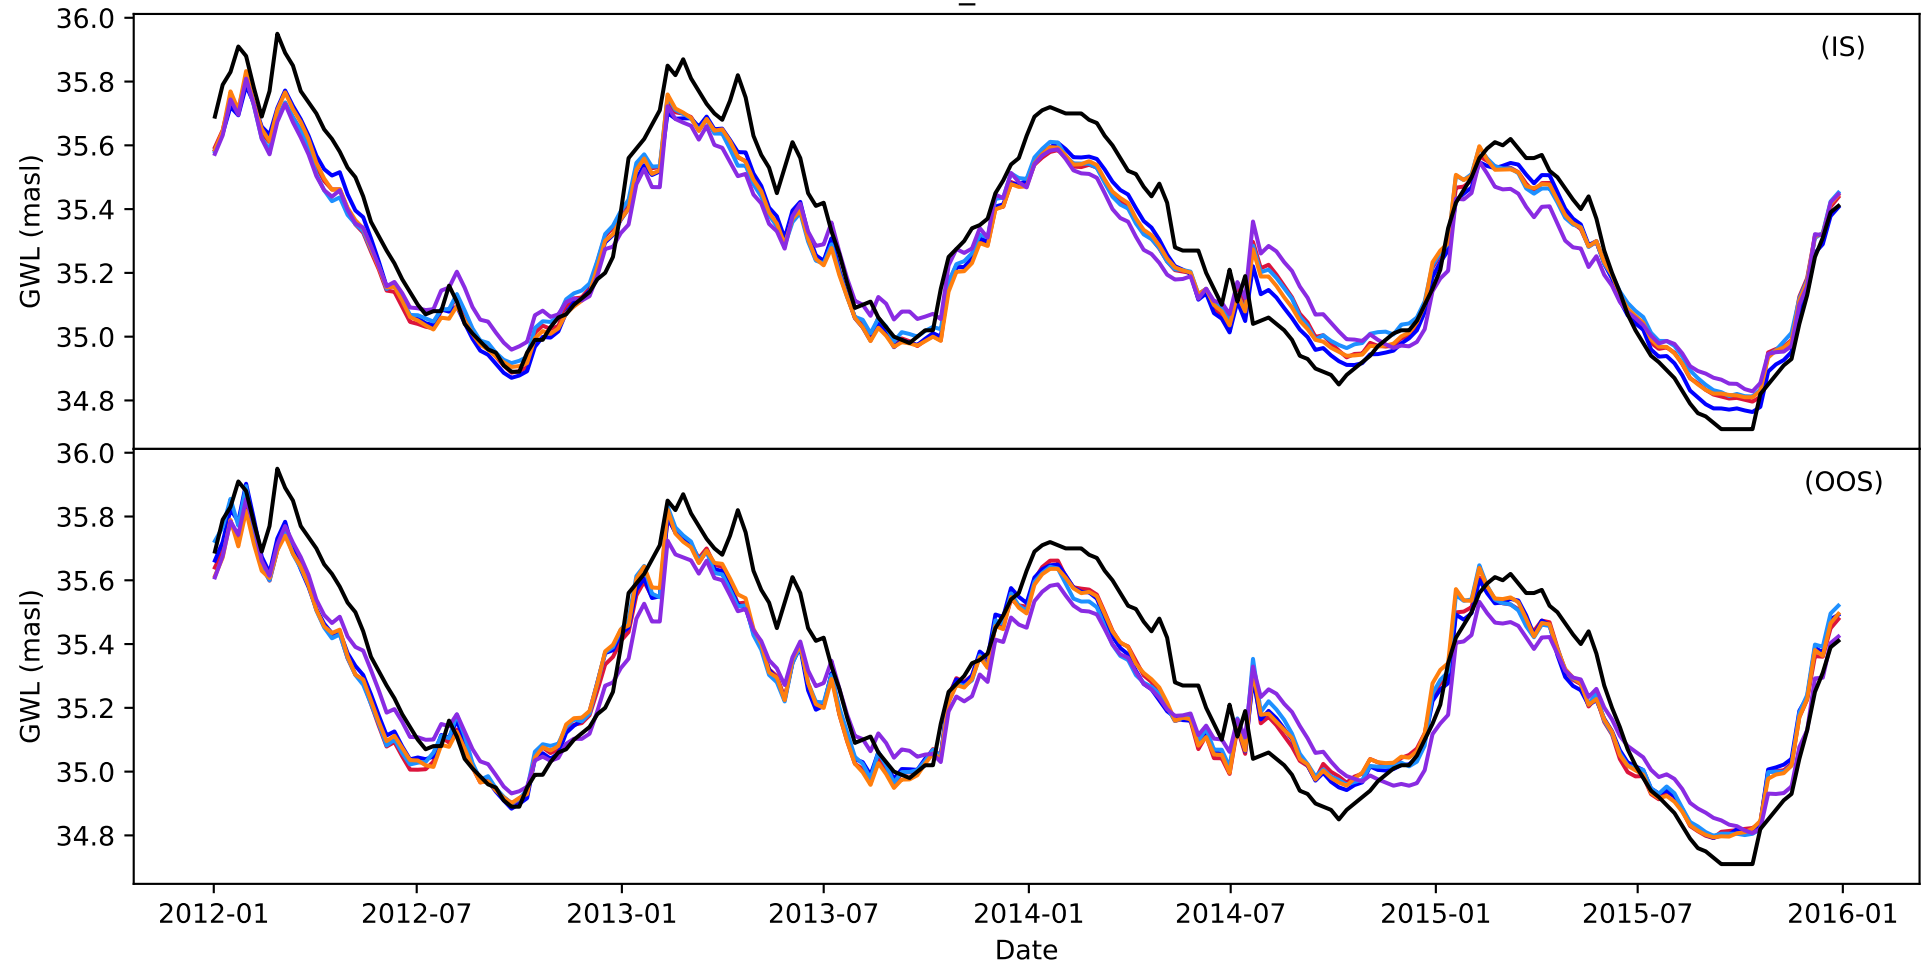

- obs
- ENVfeat (IS) NSE=0.892
- RNDfeat18 (IS) NSE=0.890
- TSfeat (IS) NSE=0.922
- RNDfeat9 (IS) NSE=0.890
- DYNSonly (IS) NSE=0.847

- obs
- ENVfeat (OOS) NSE=0.790
- RNDfeat18 (OOS) NSE=0.817
- TSfeat (OOS) NSE=0.859
- RNDfeat8 (OOS) NSE=0.817
- DYNSonly (OOS) NSE=0.859

BB\_33437070

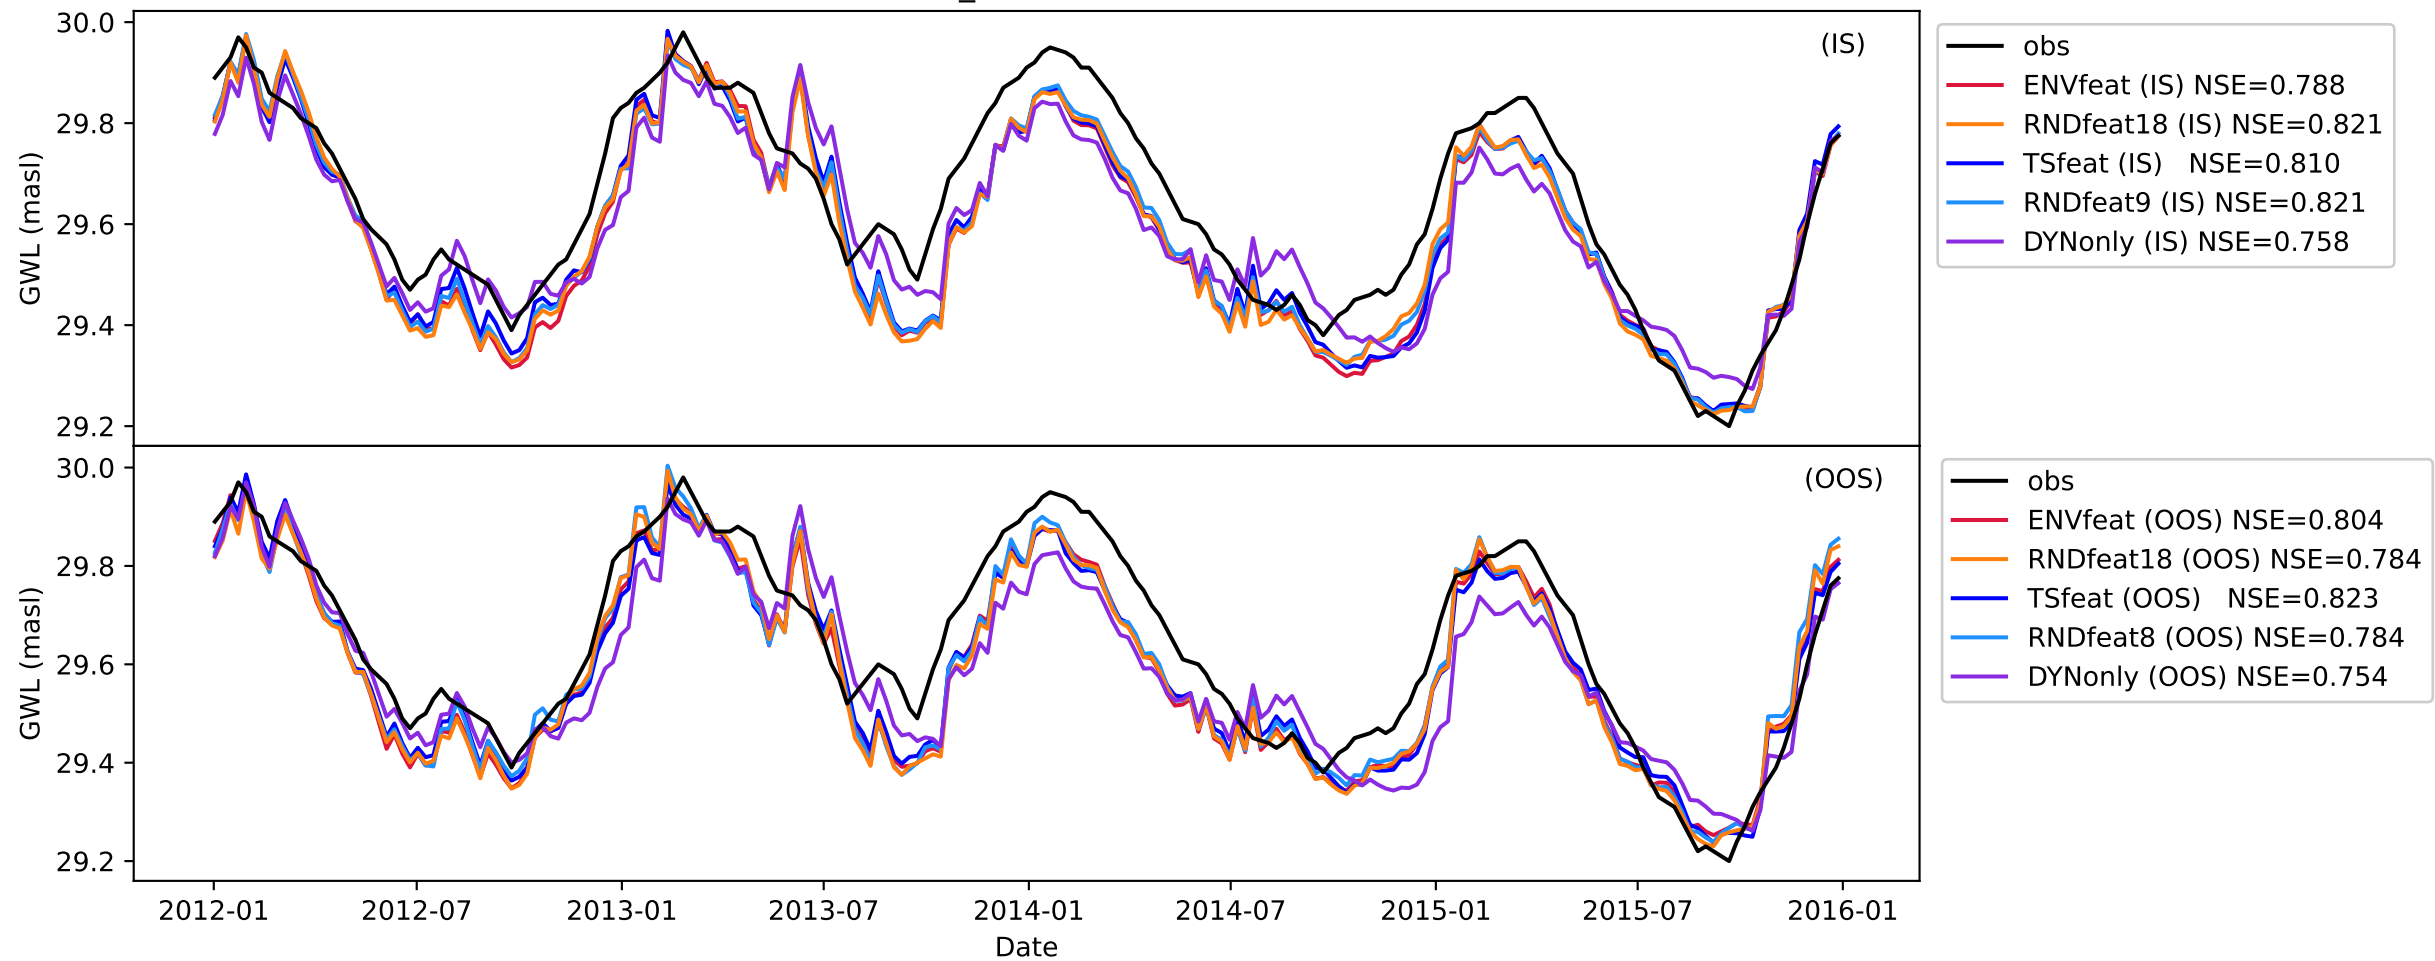



BB\_33437090

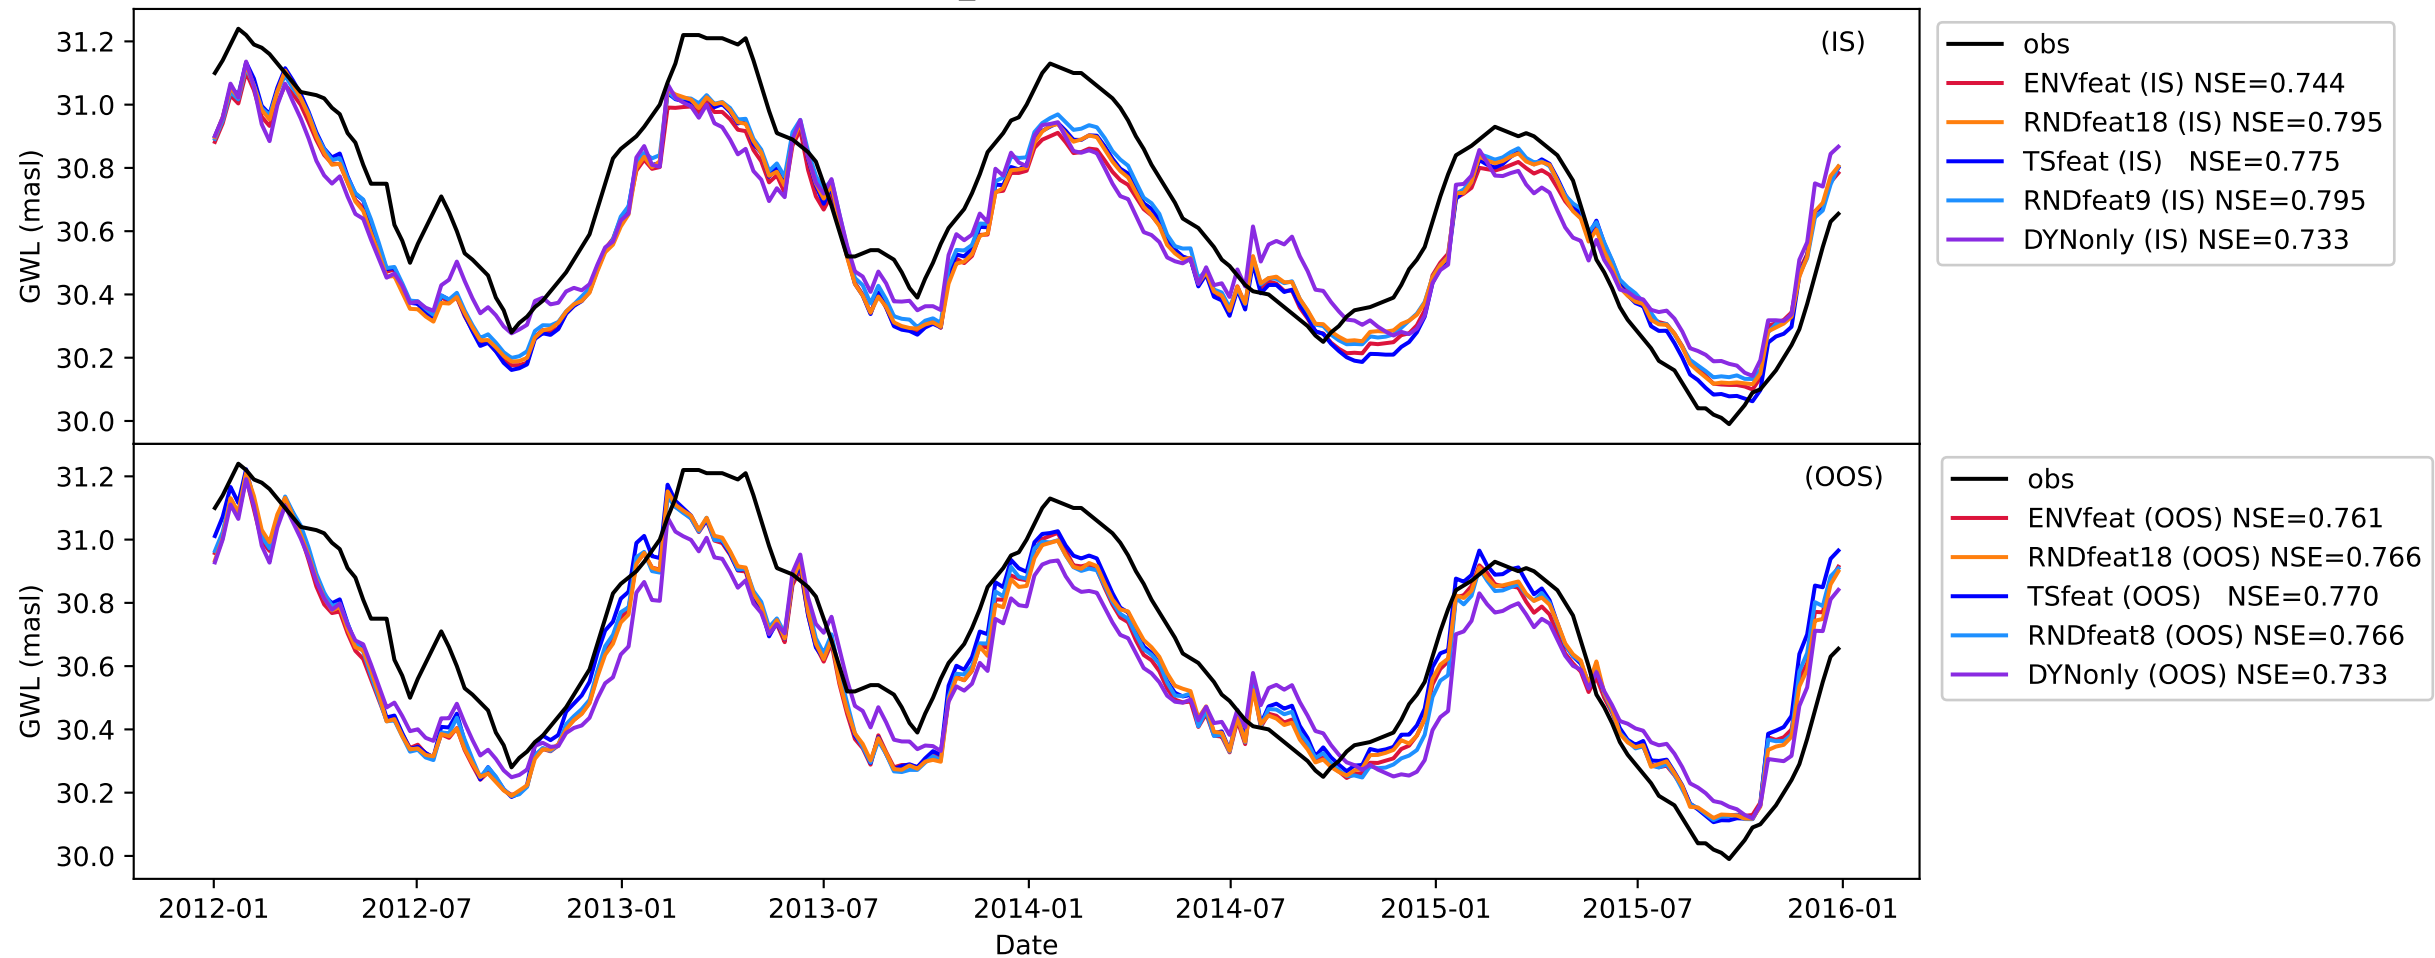

BB\_33437106

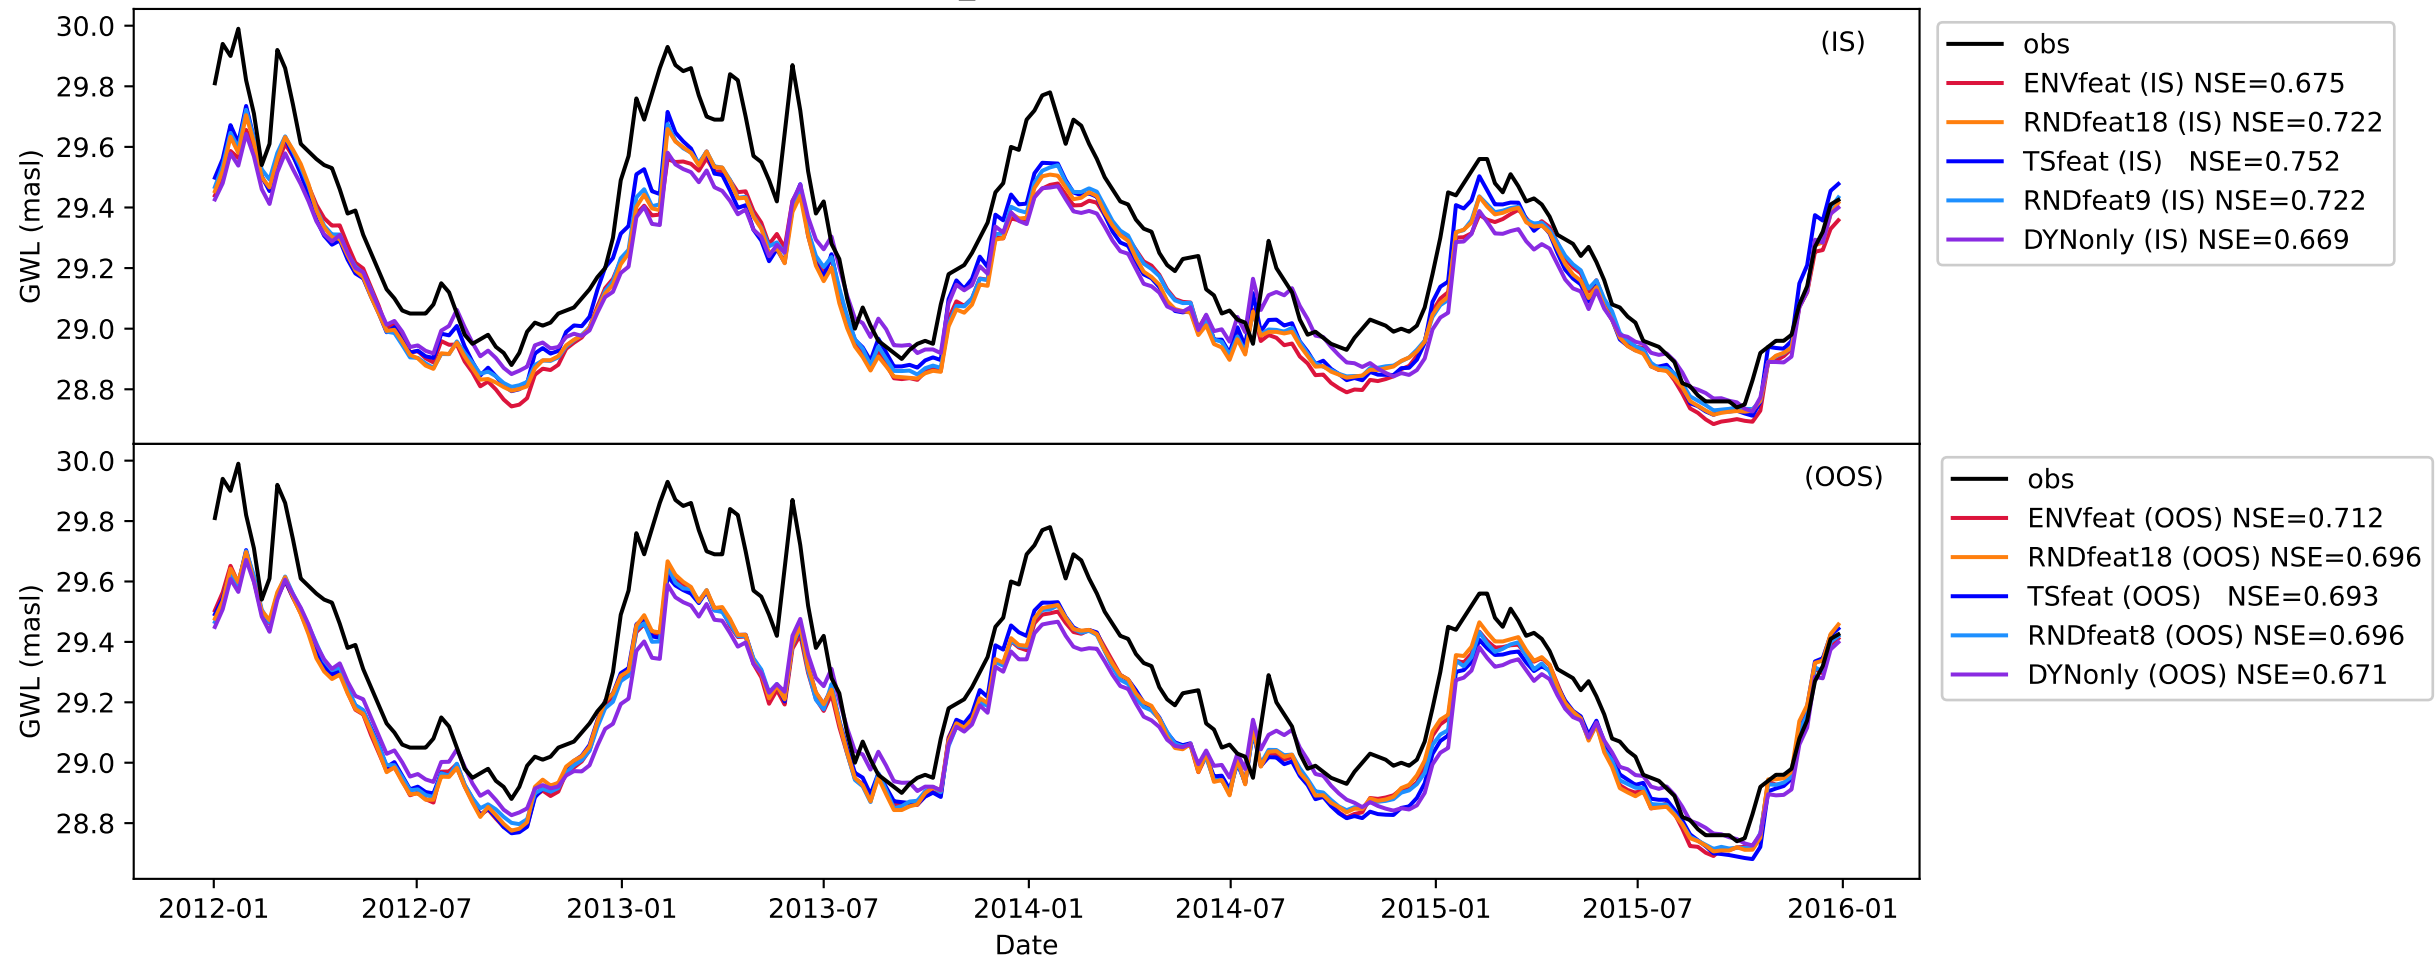

BB\_33452451

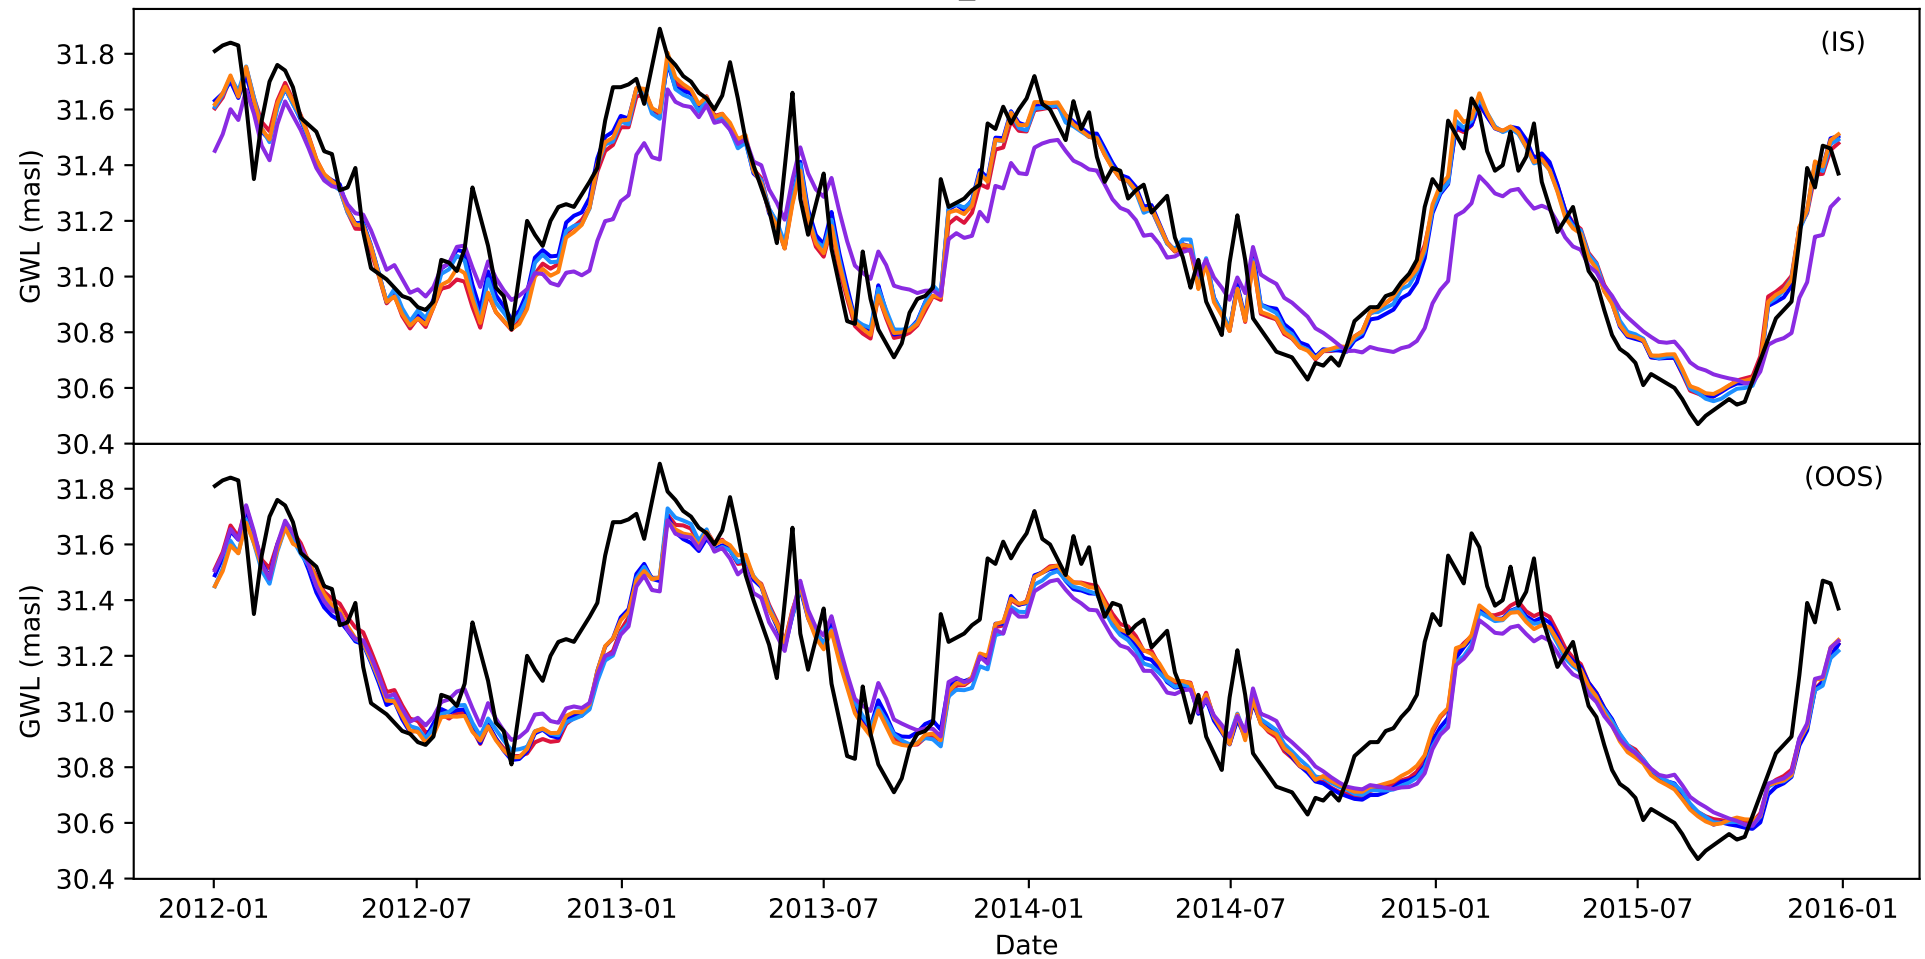

- obs
- ENVfeat (IS) NSE=0.880
- RNDfeat18 (IS) NSE=0.883
- TSfeat (IS) NSE=0.893
- RNDfeat9 (IS) NSE=0.883
- DYNOnly (IS) NSE=0.712

- obs
- ENVfeat (OOS) NSE=0.730
- RNDfeat18 (OOS) NSE=0.689
- TSfeat (OOS) NSE=0.726
- RNDfeat8 (OOS) NSE=0.689
- DYNOnly (OOS) NSE=0.696

BB\_33470960

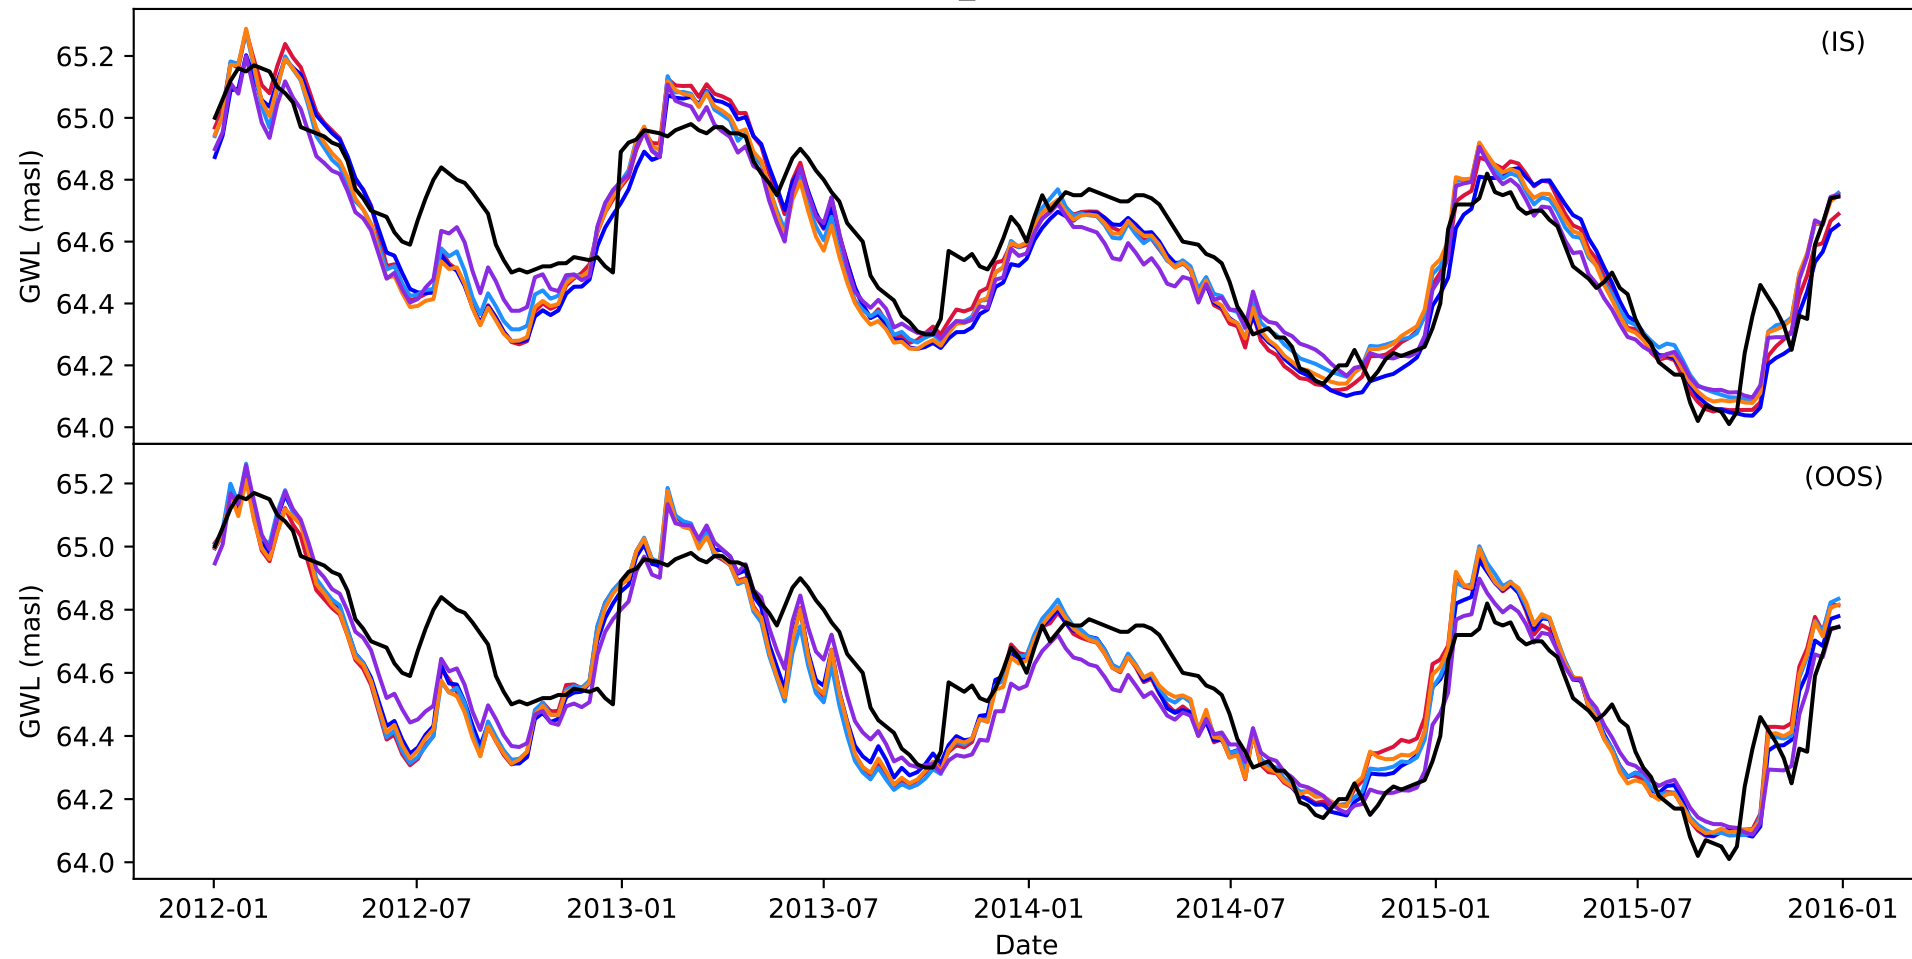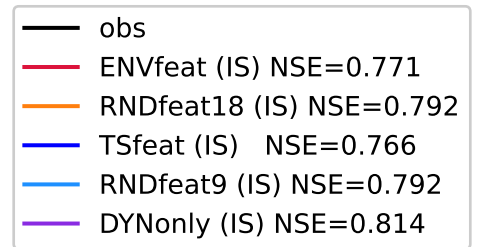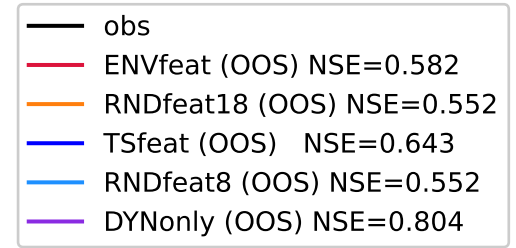

BB\_34426110

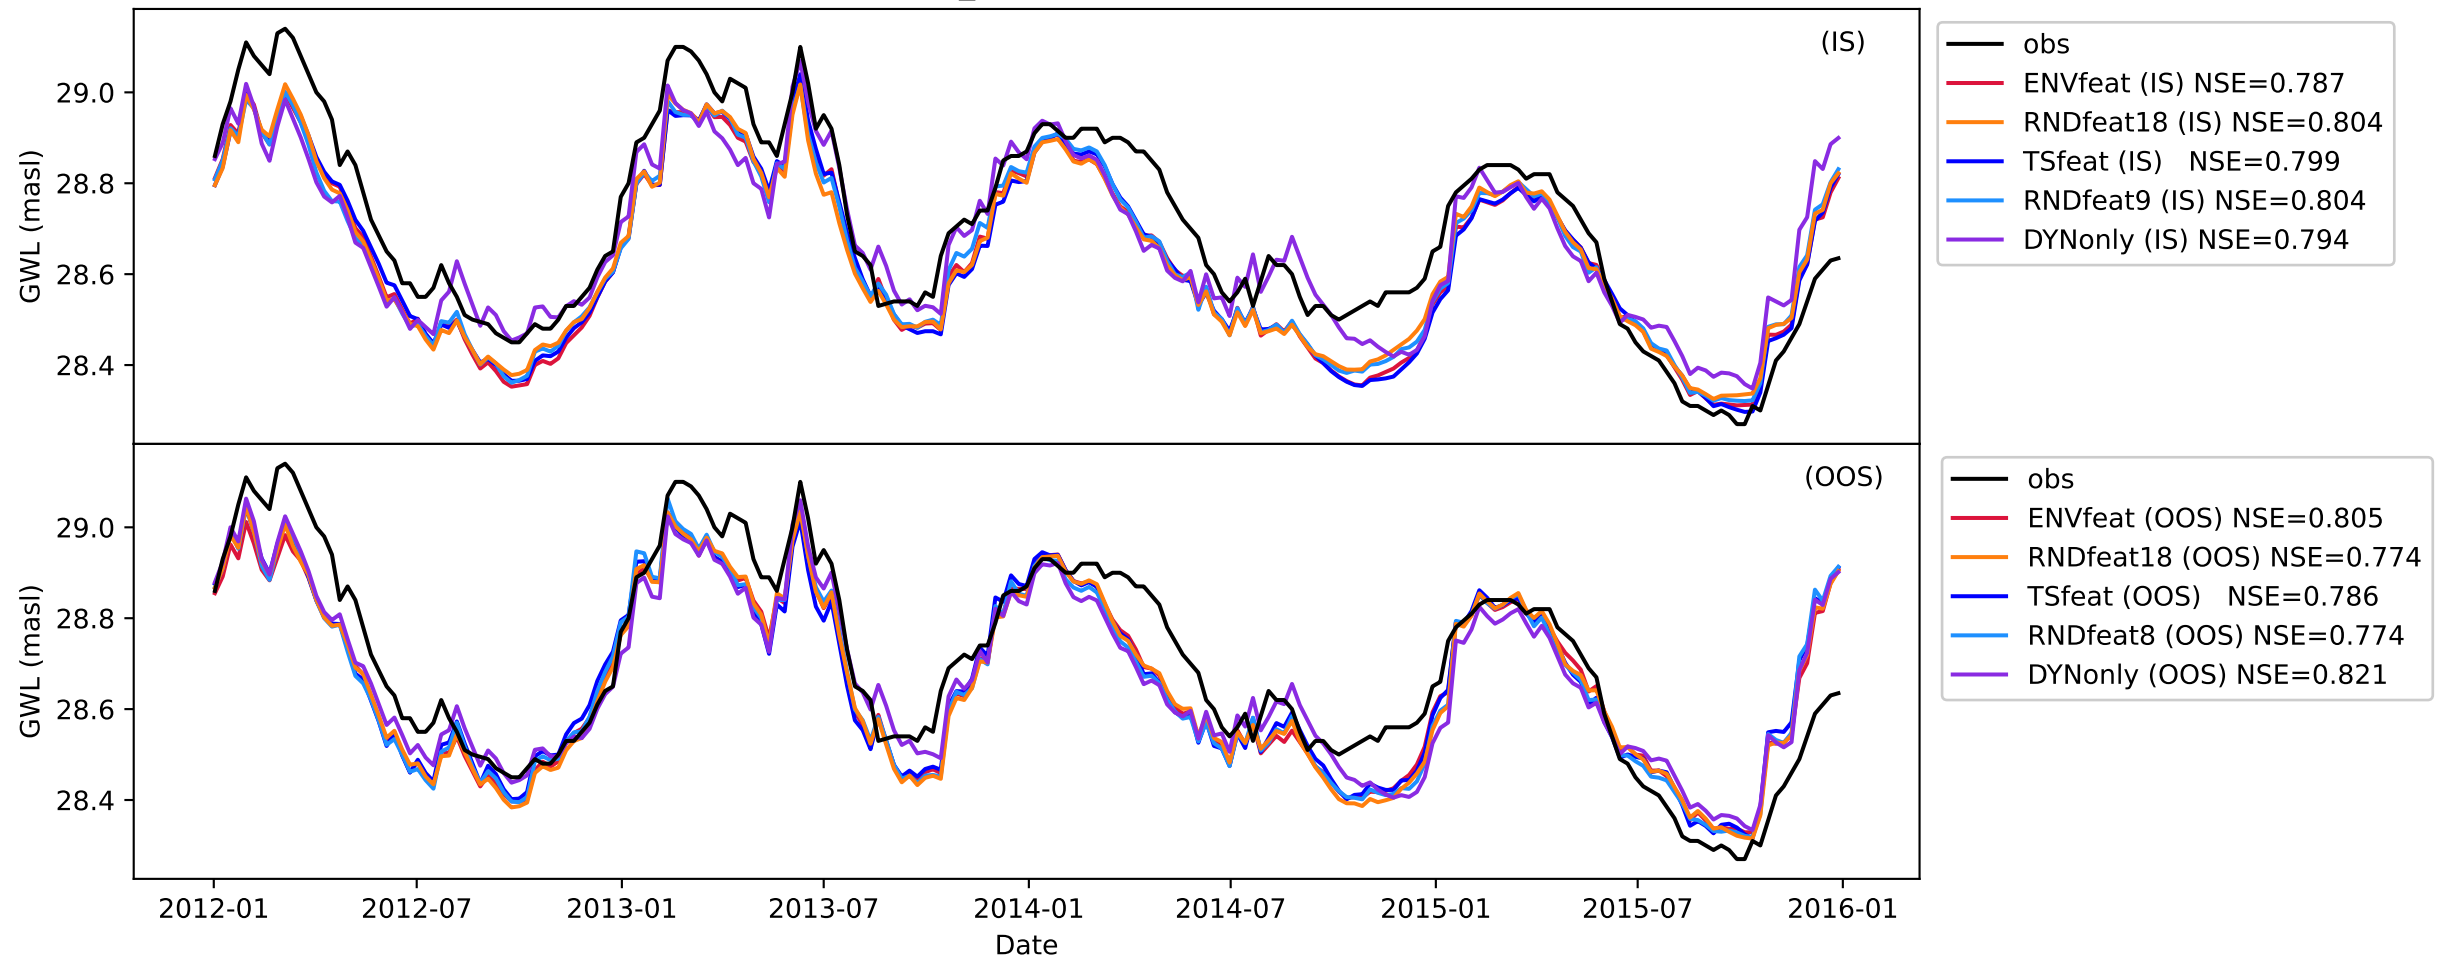

BB\_34522461

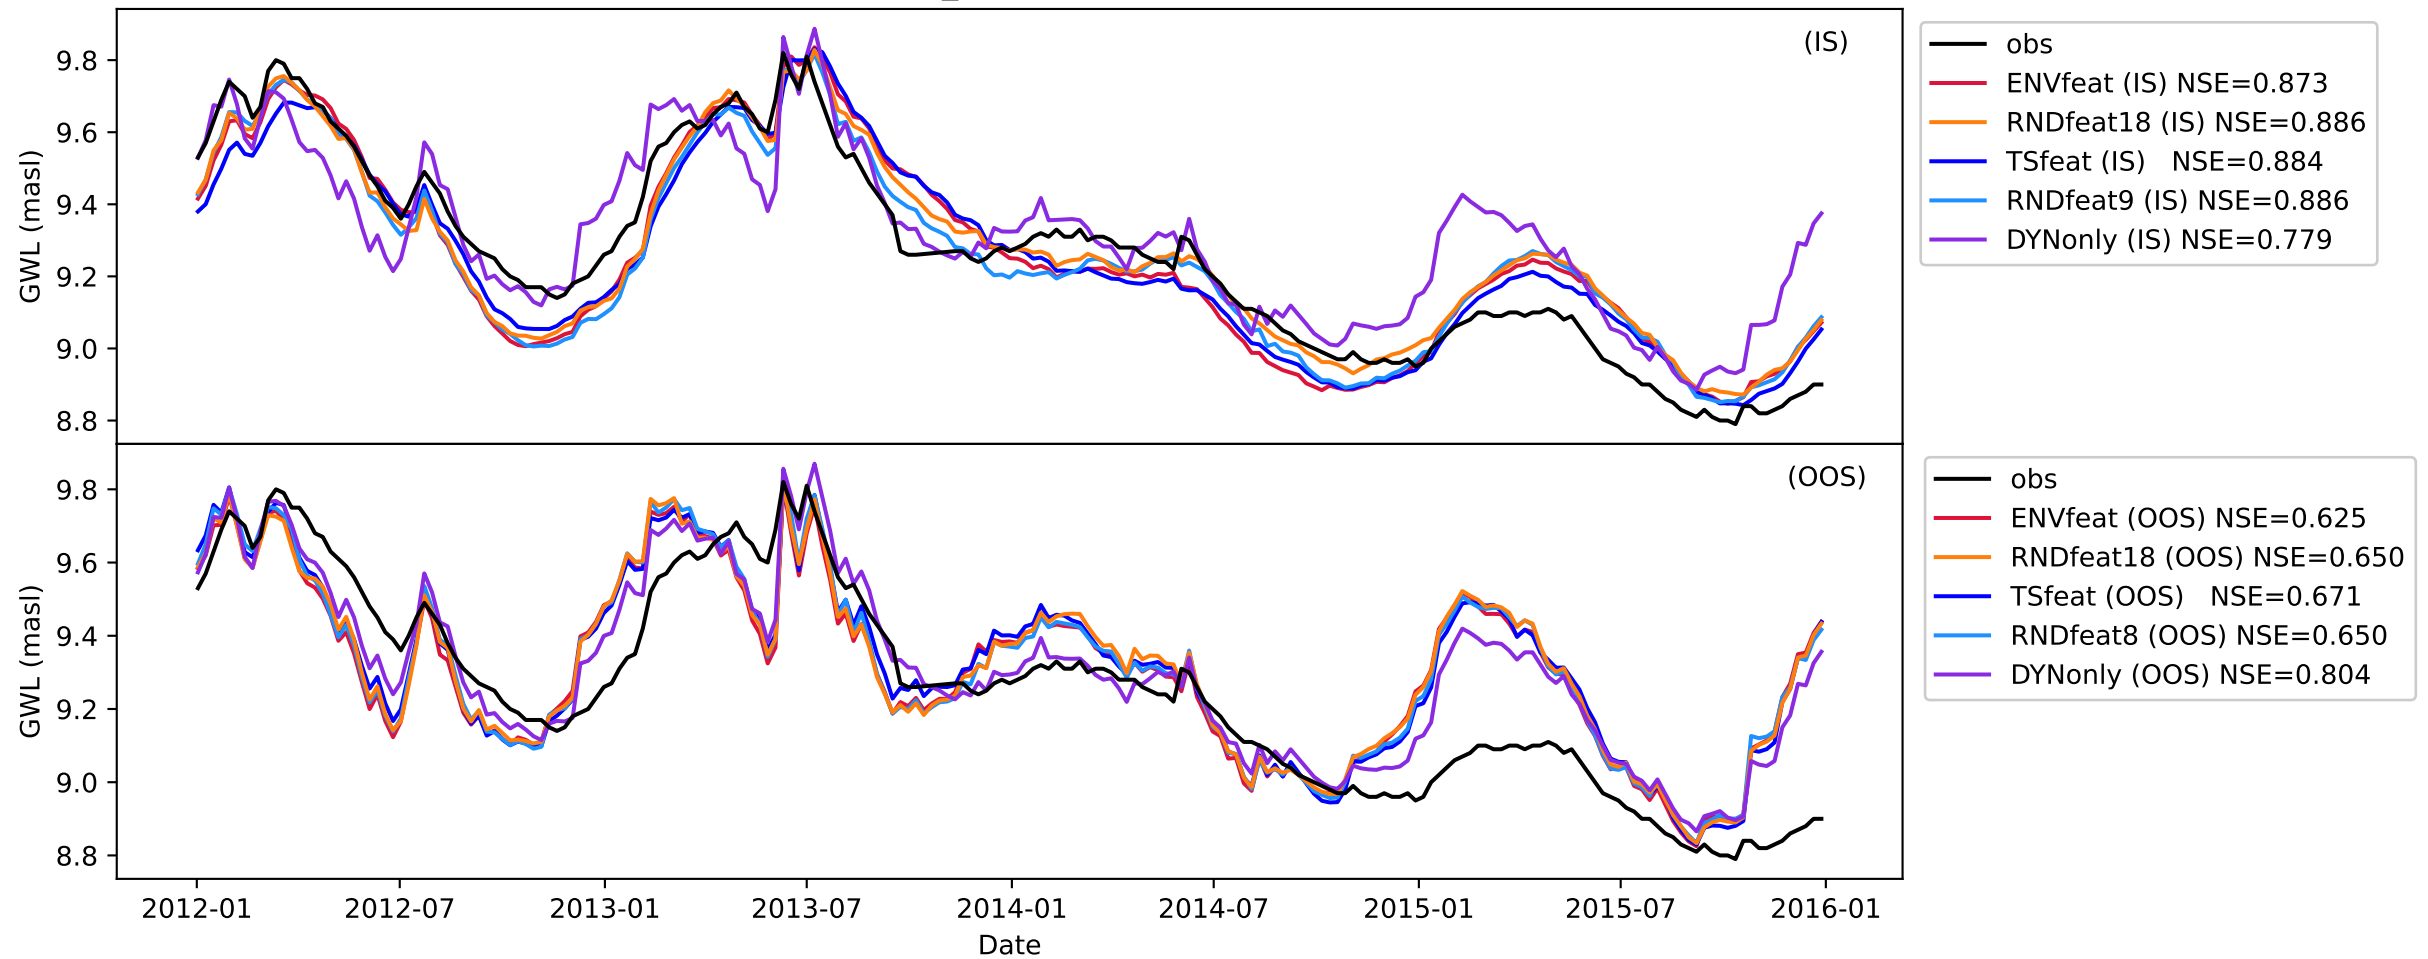

BB\_37451908

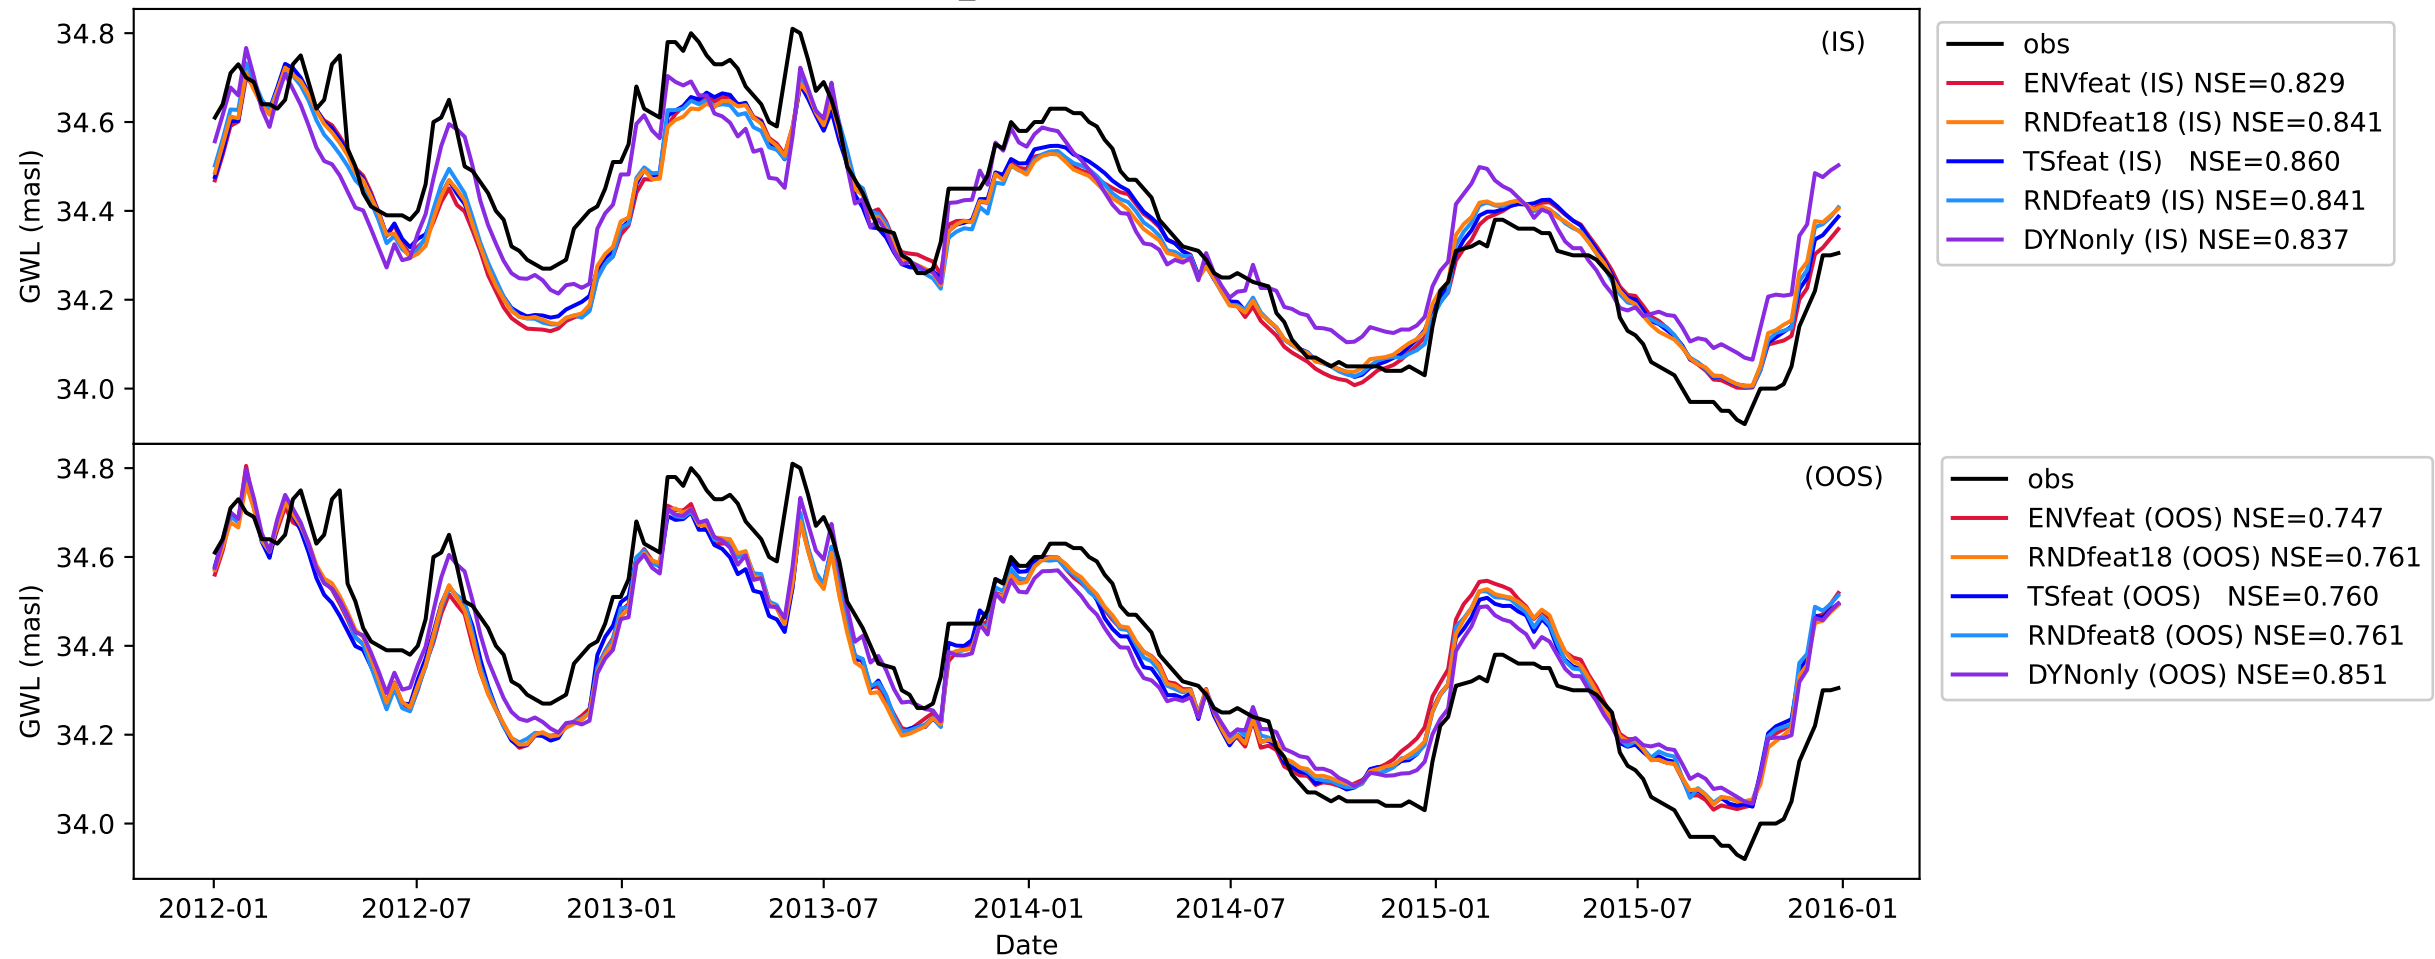

BB\_39441476

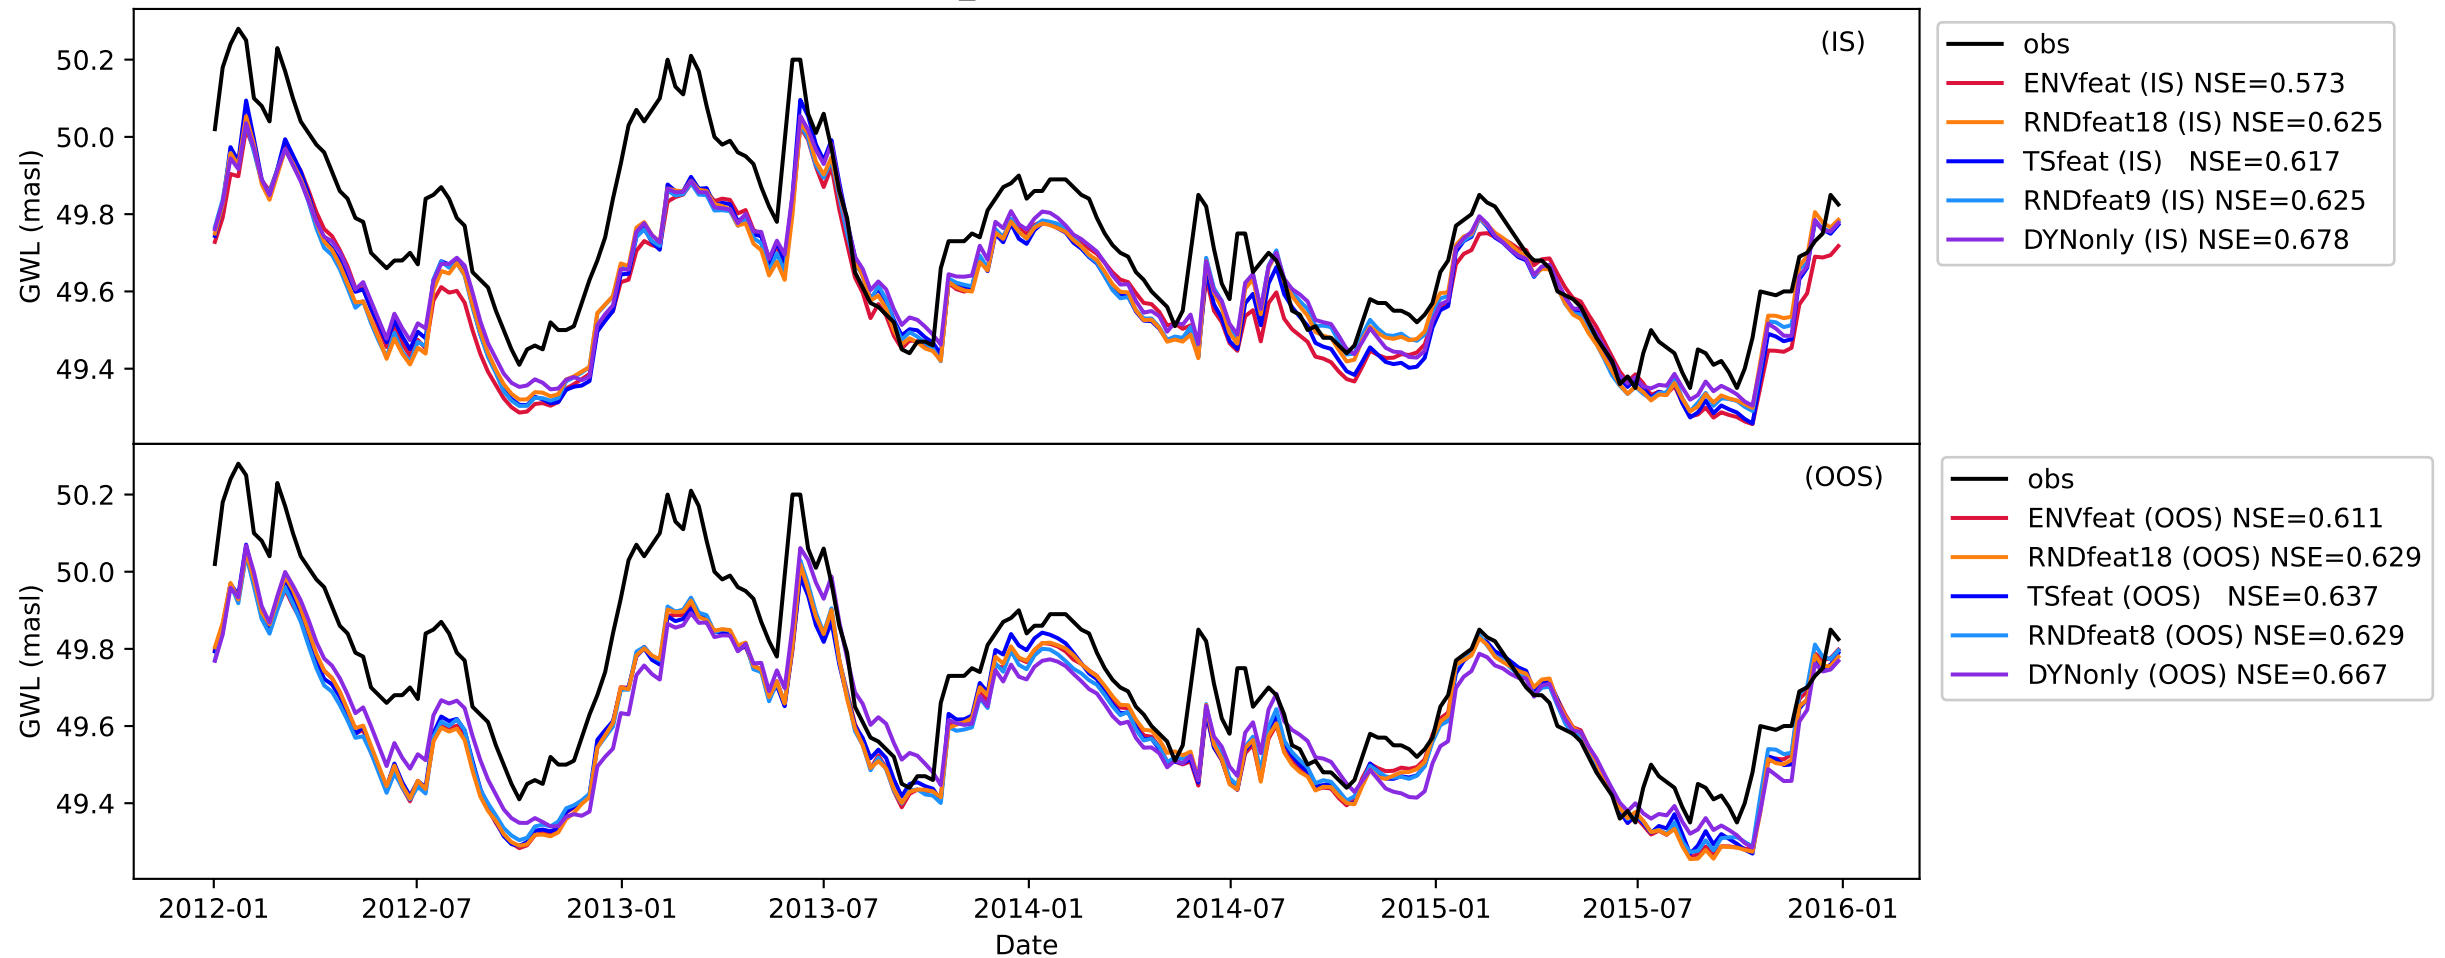



BB\_39496056

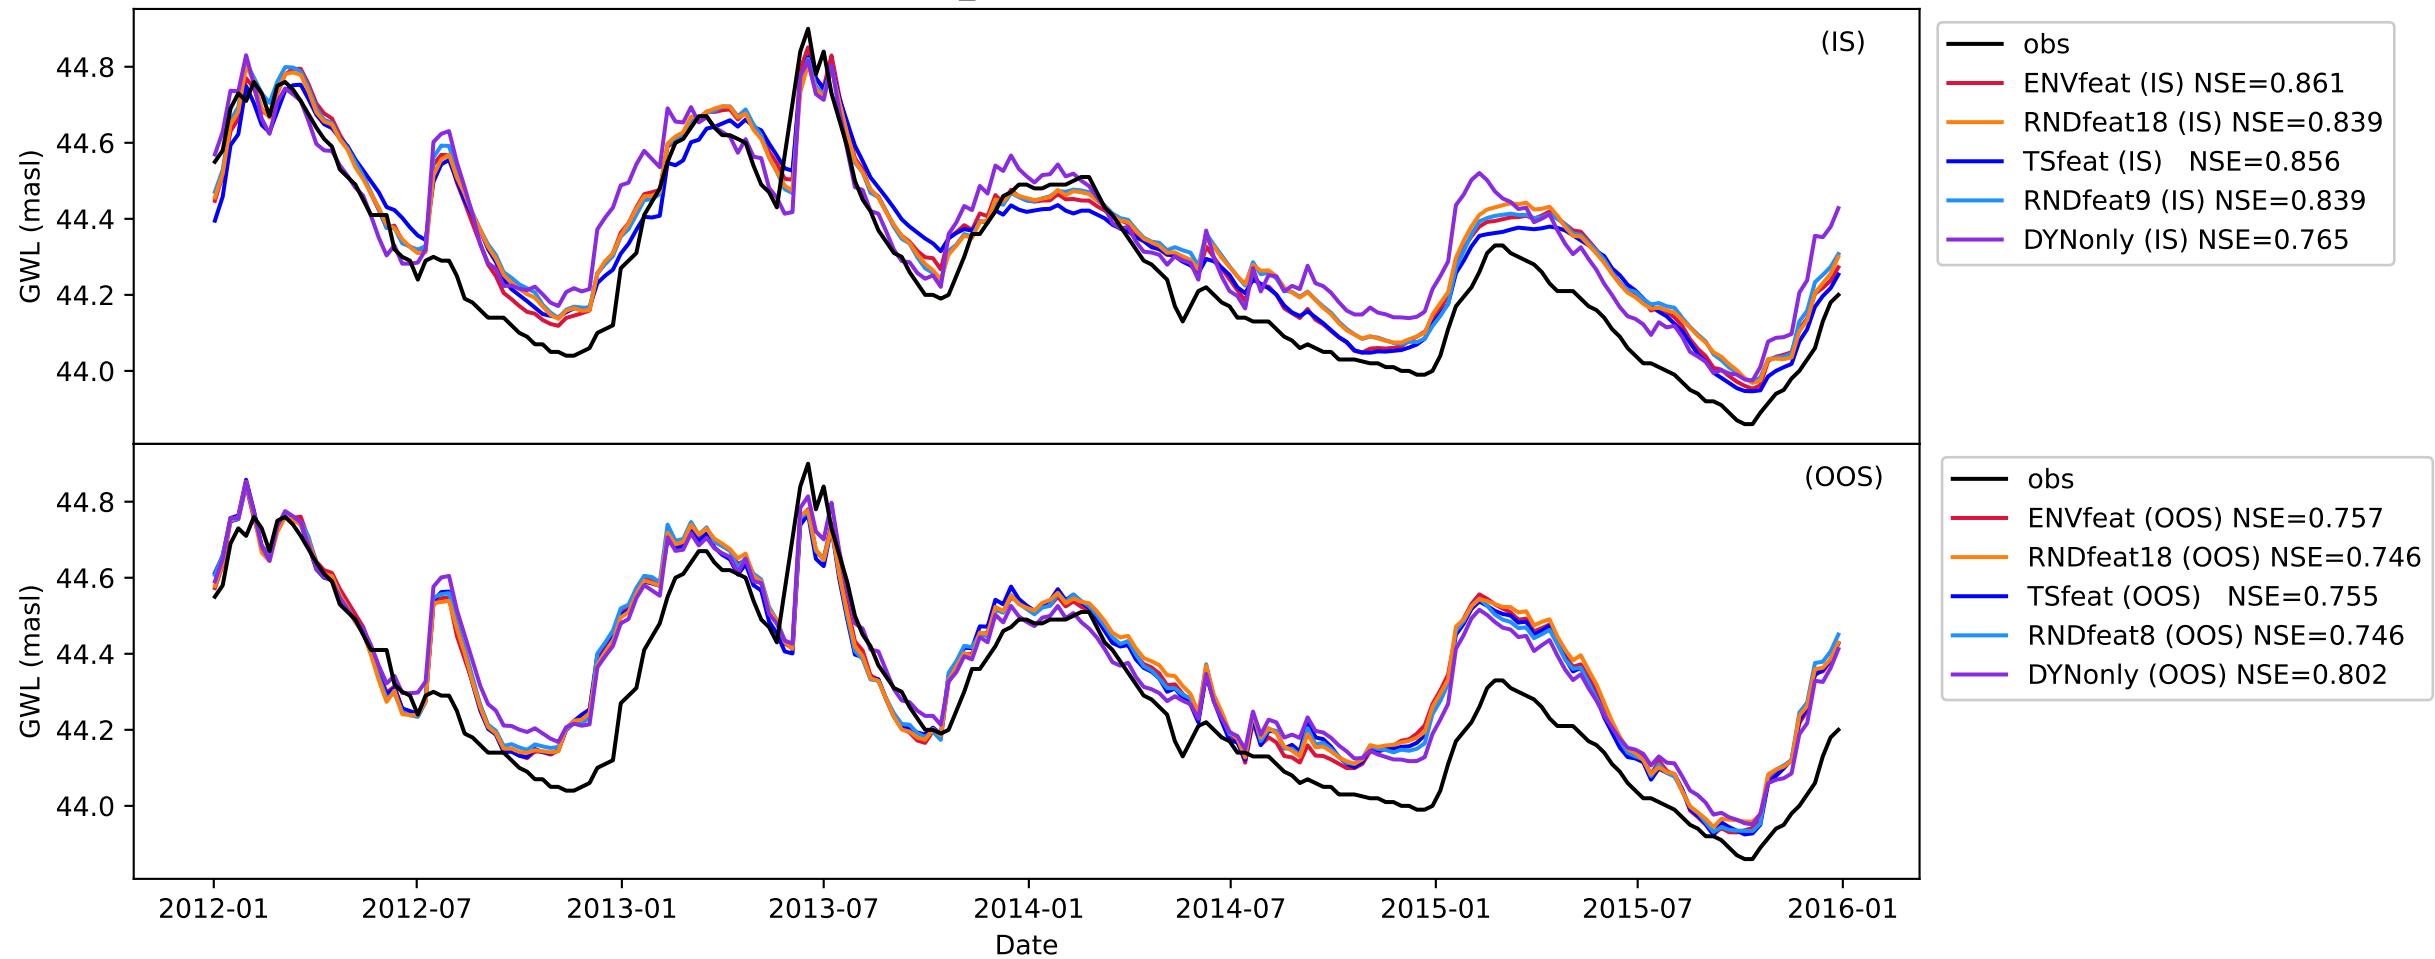

BB\_40500136

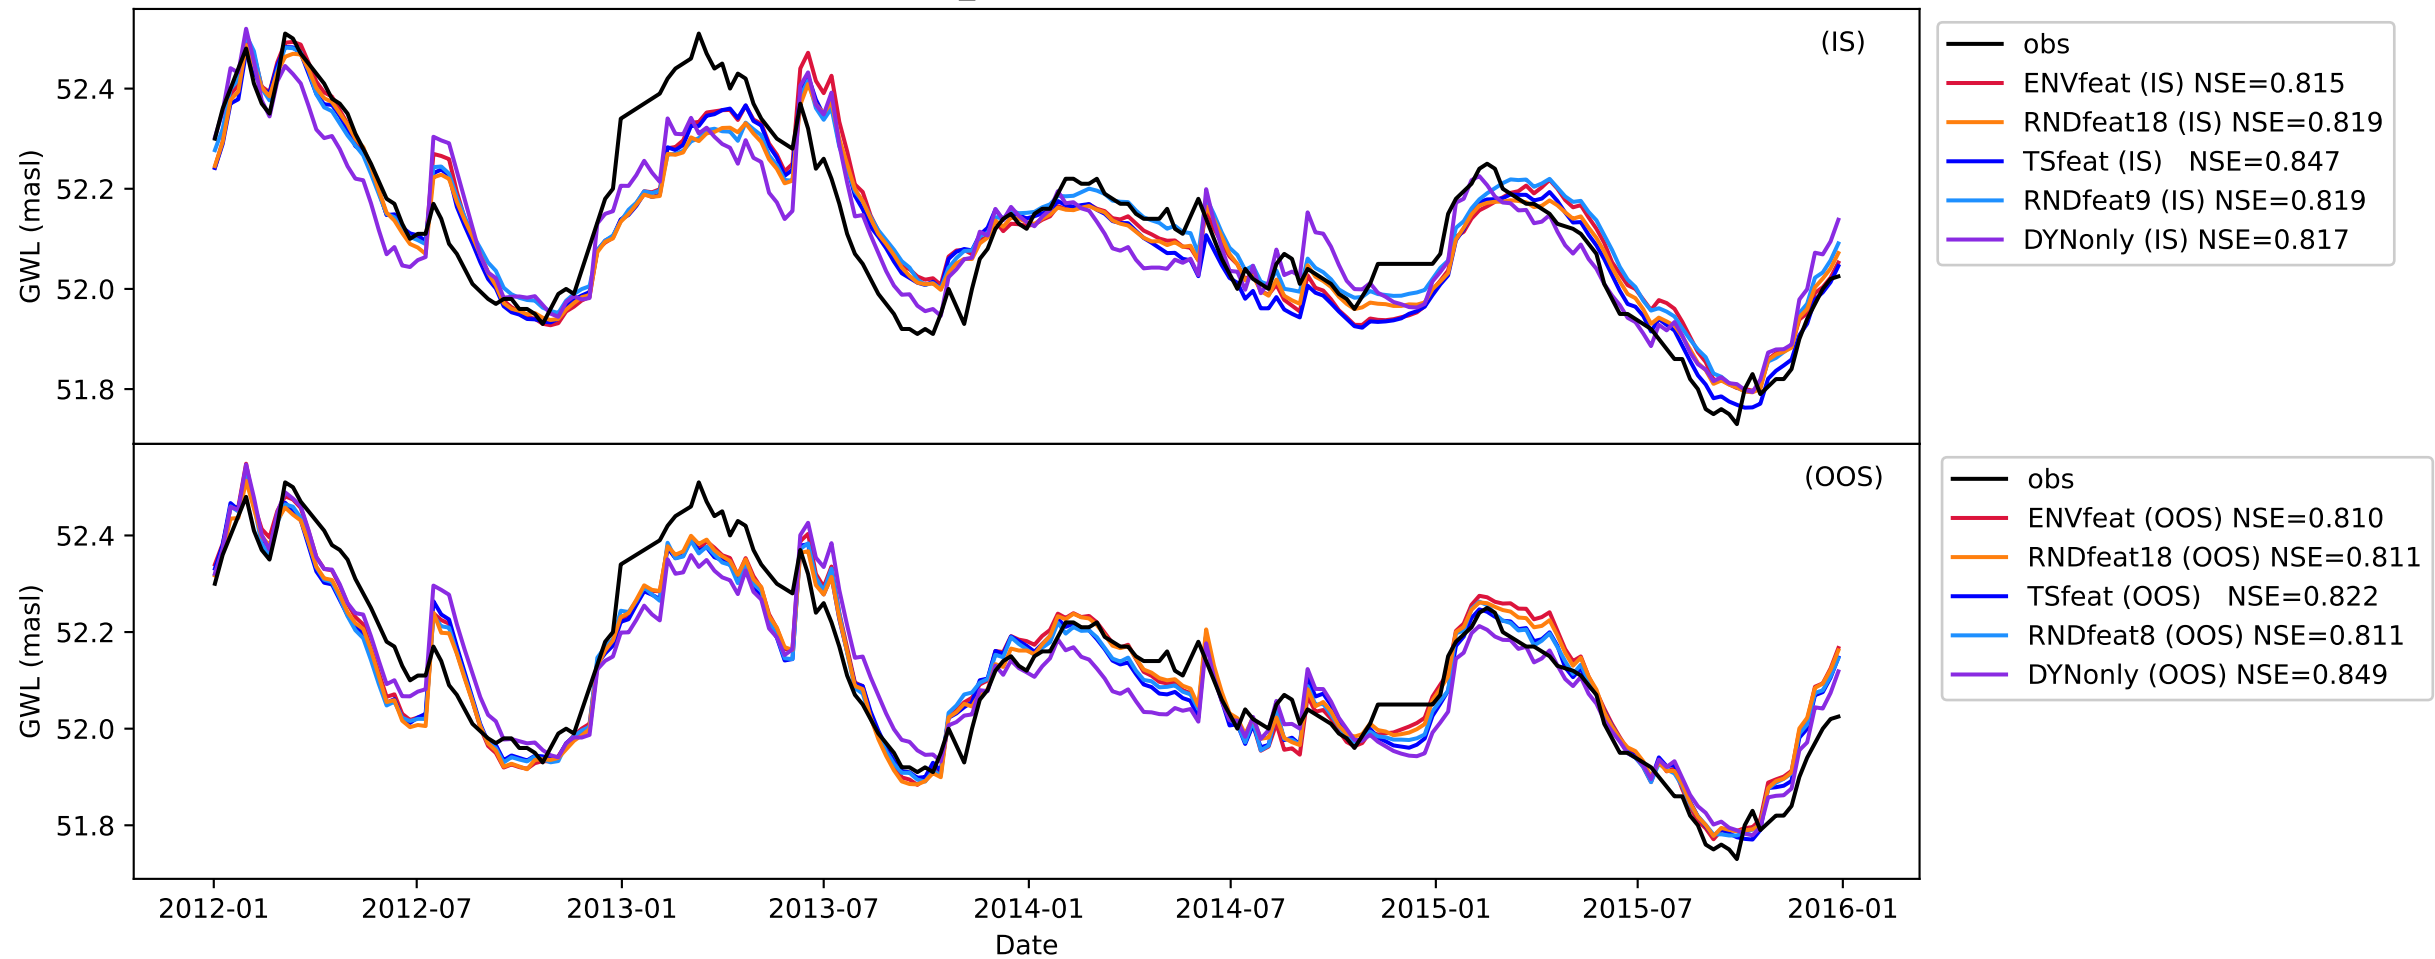

BB\_42458092

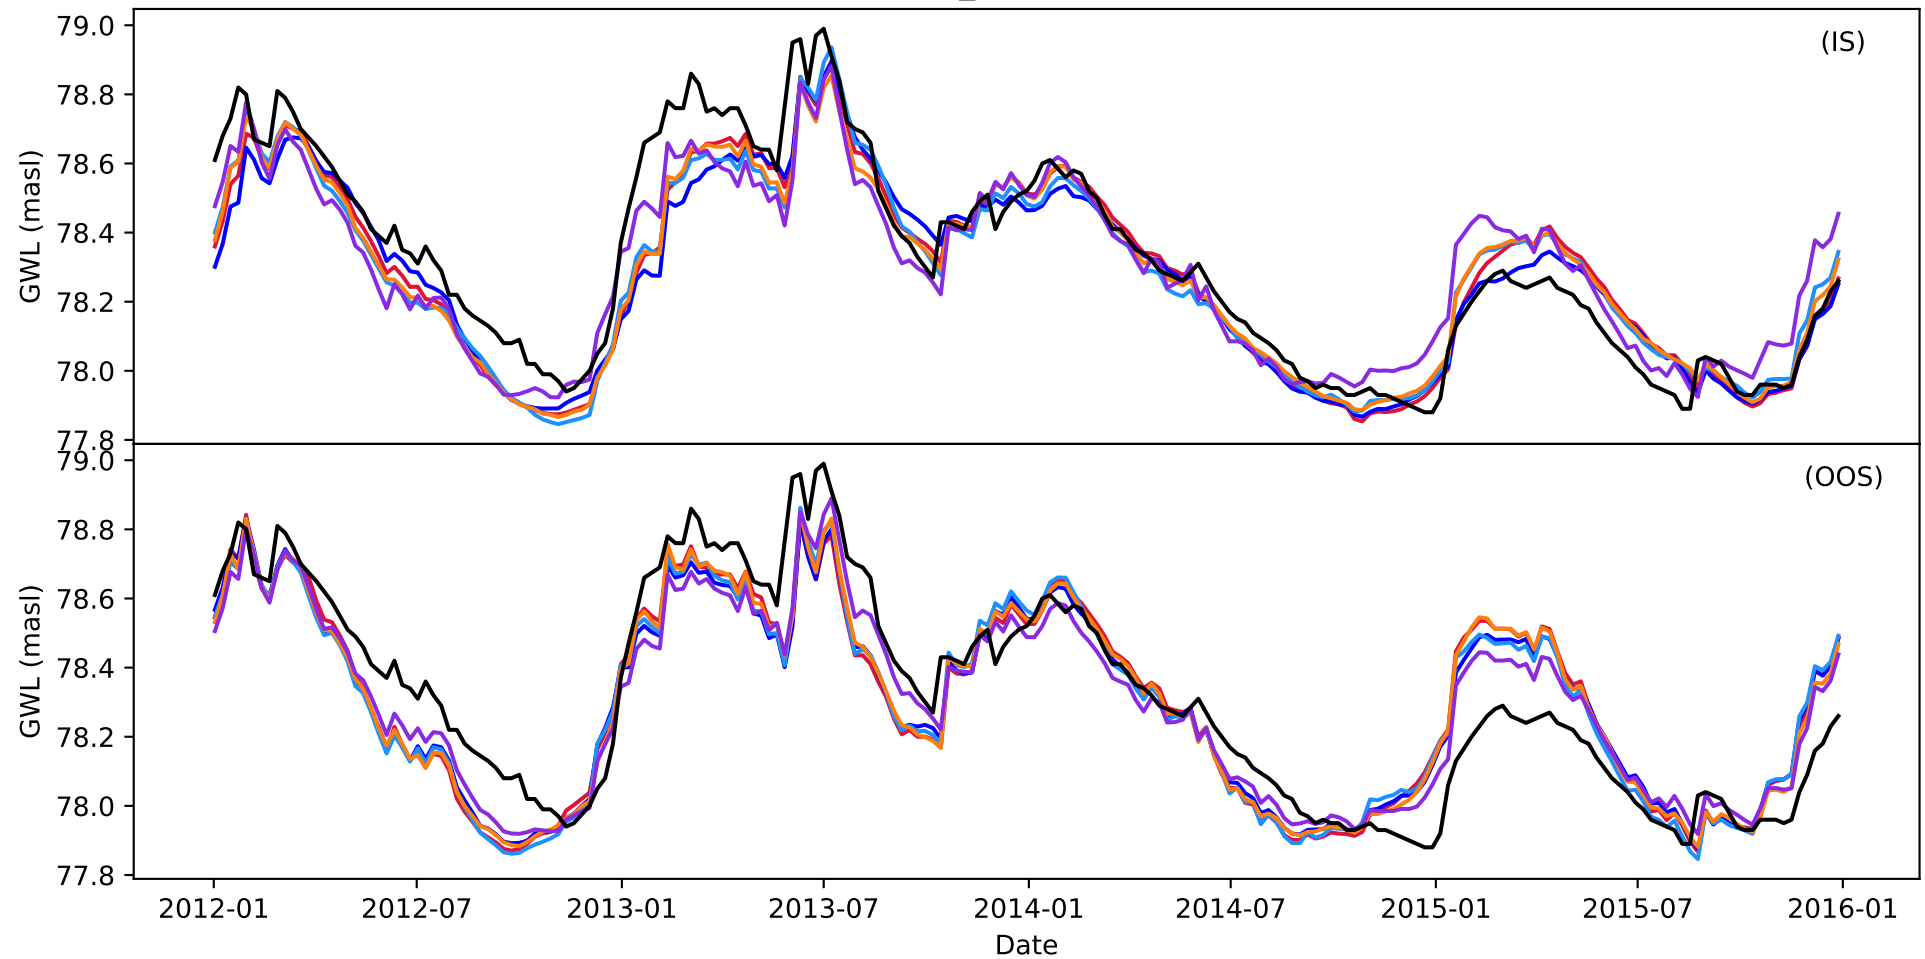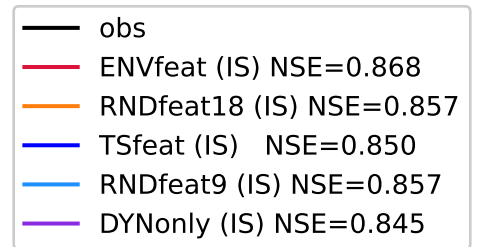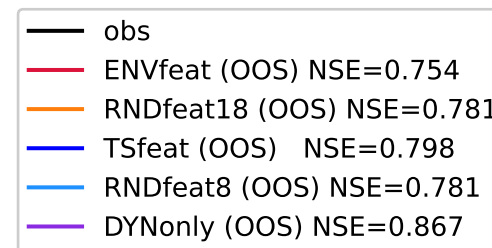

BW\_15-568-2

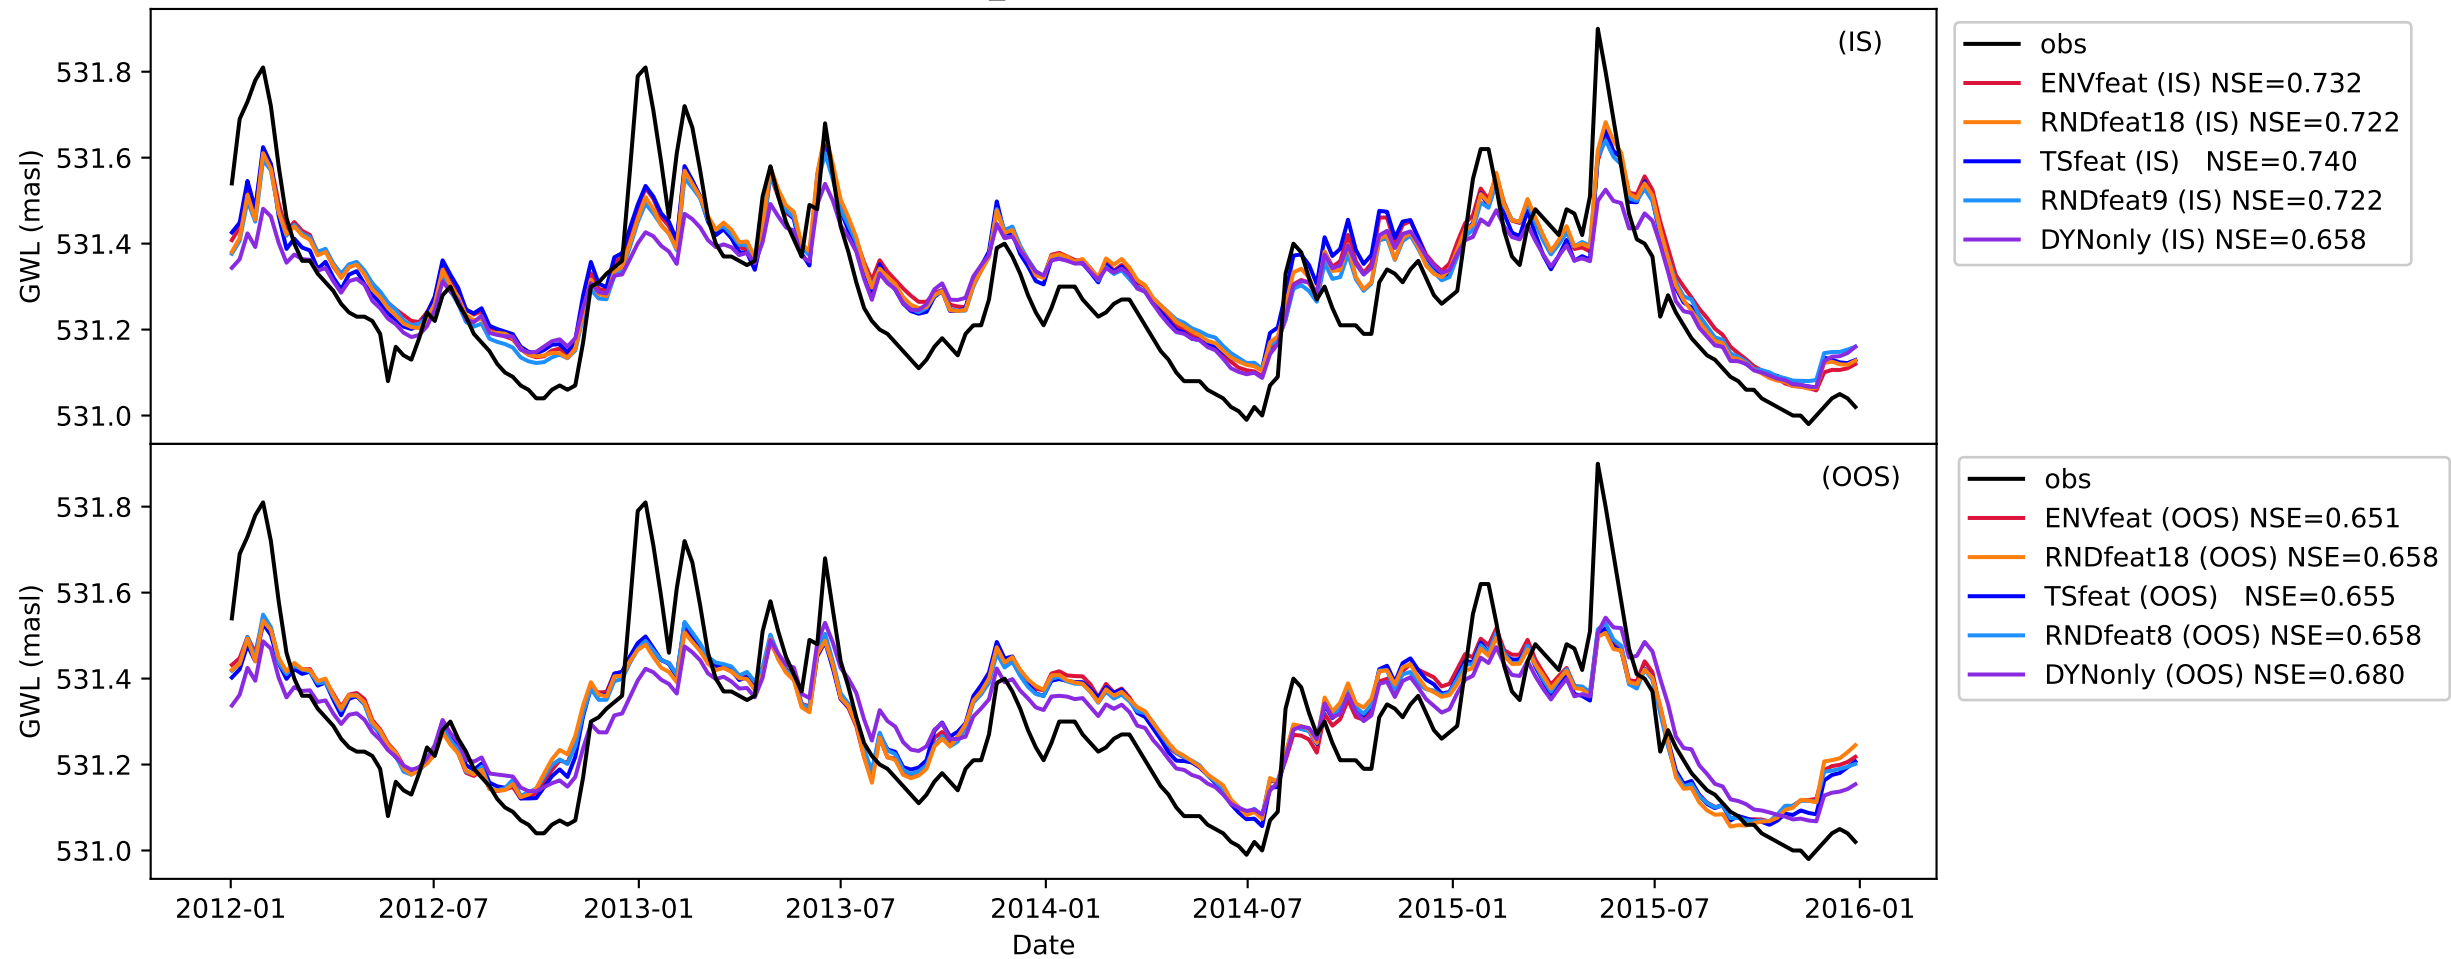

BW\_100-813-7

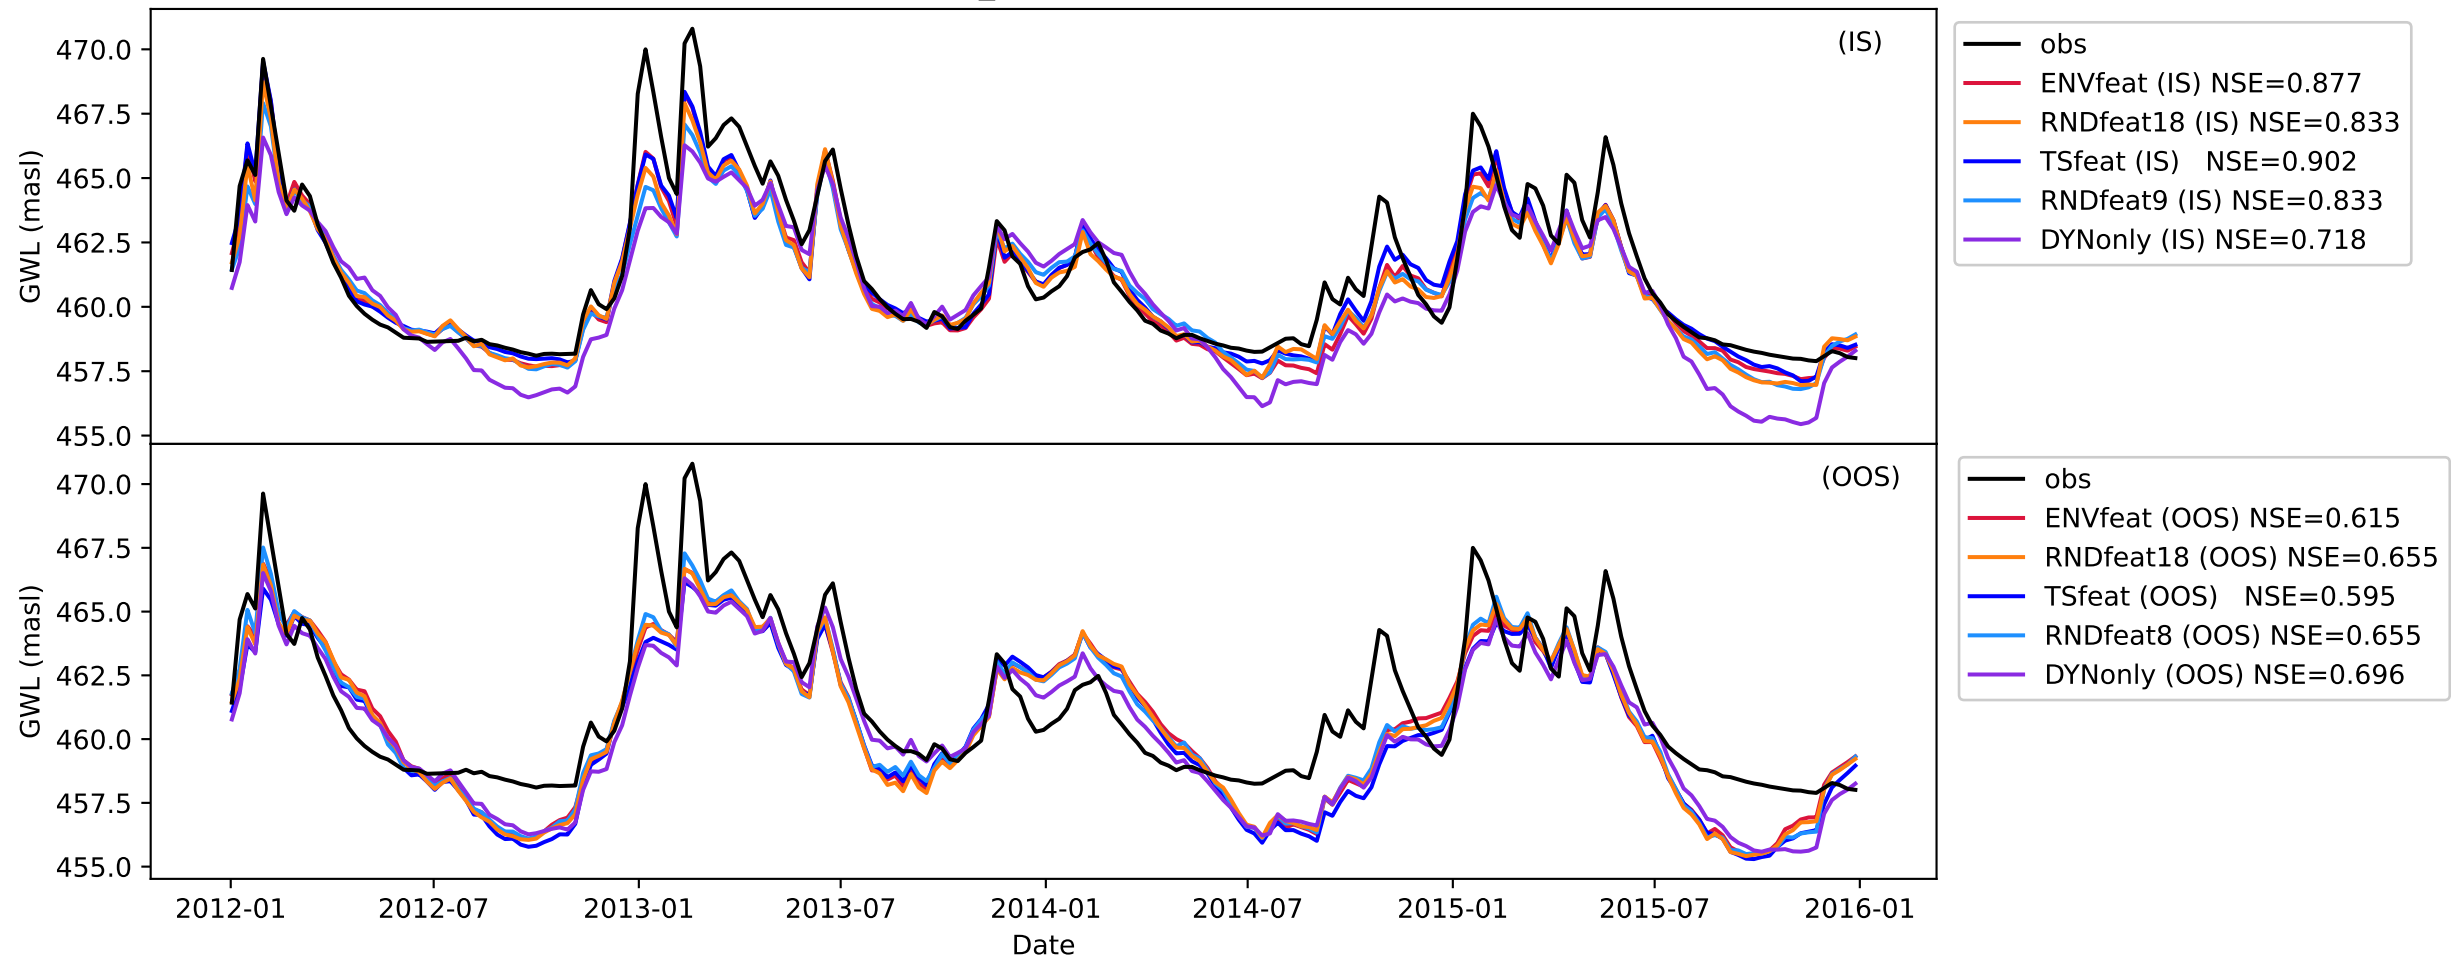

BW\_103-763-0

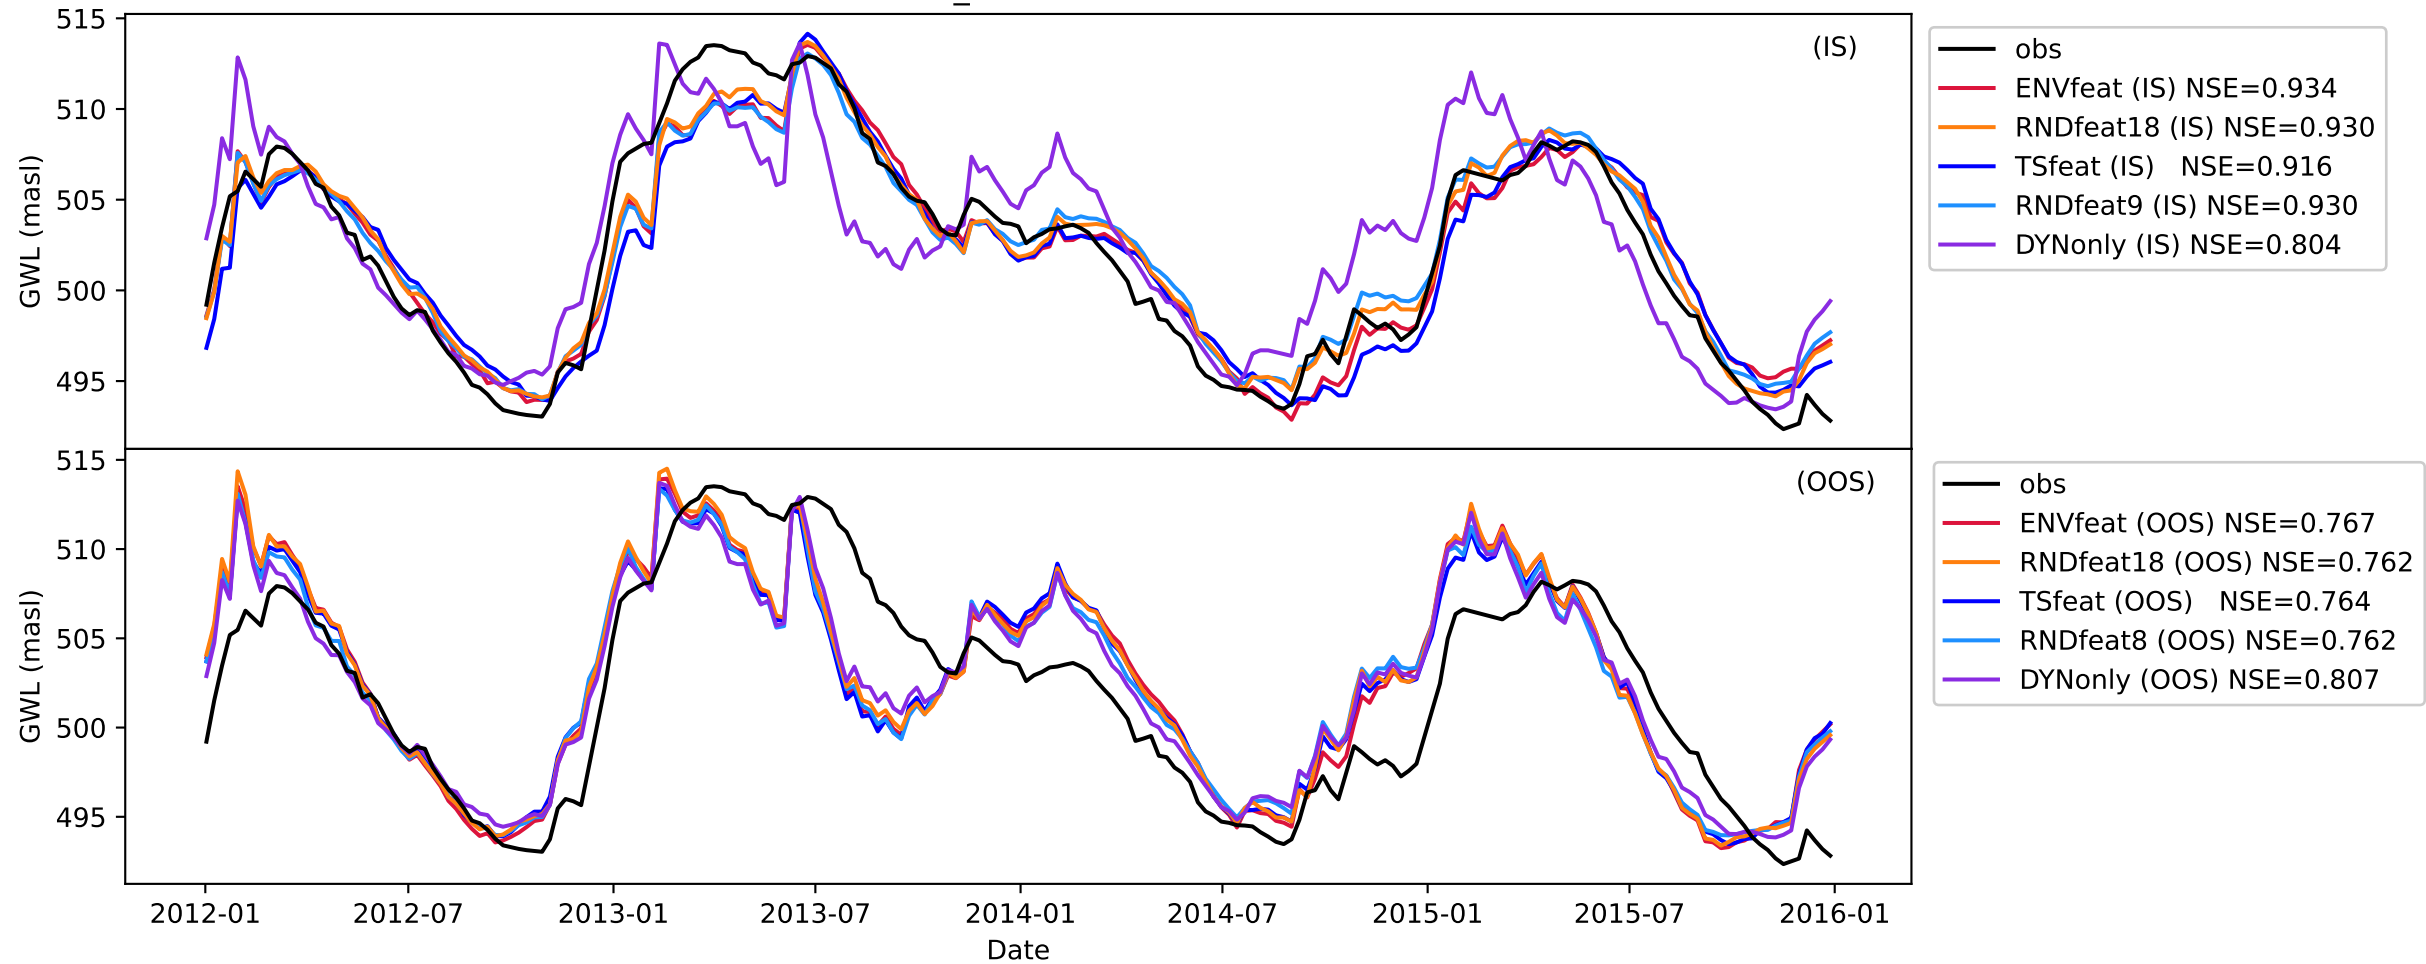

BW\_107-666-2

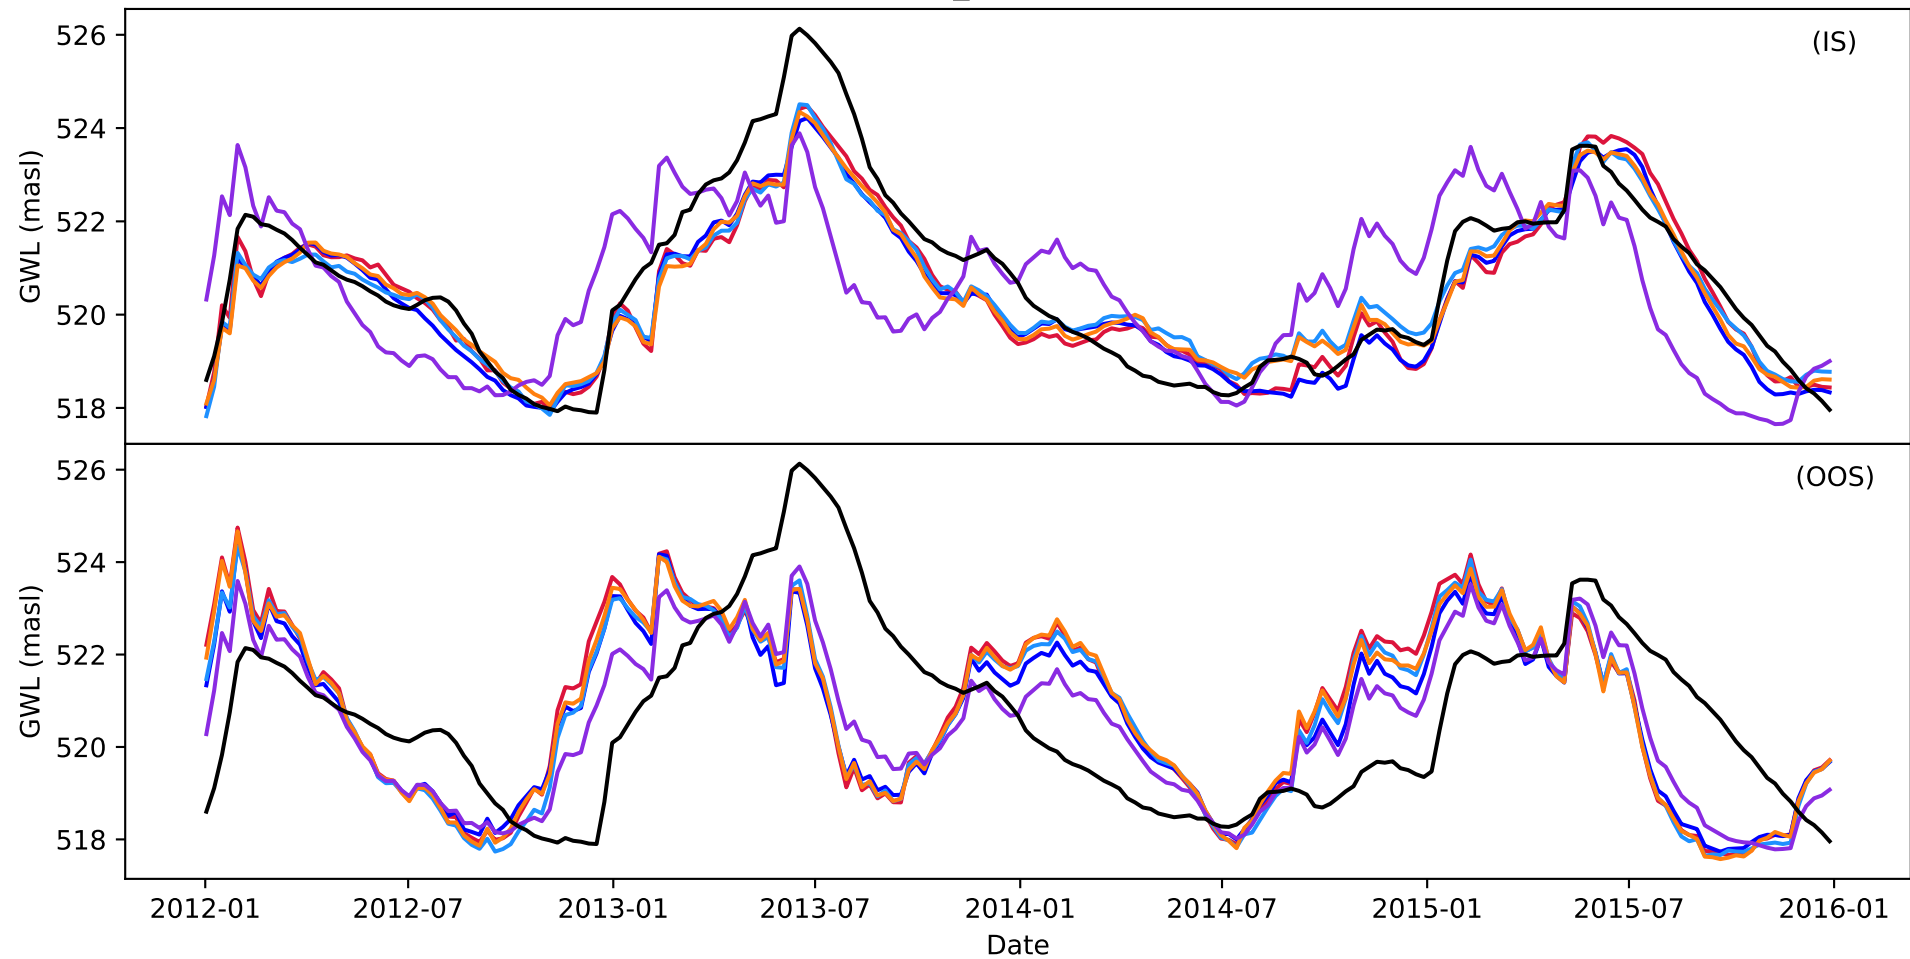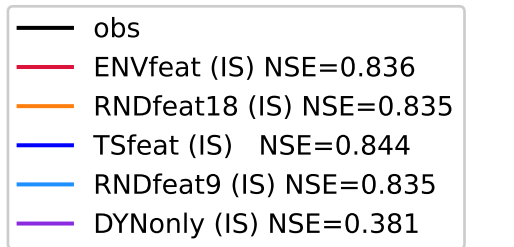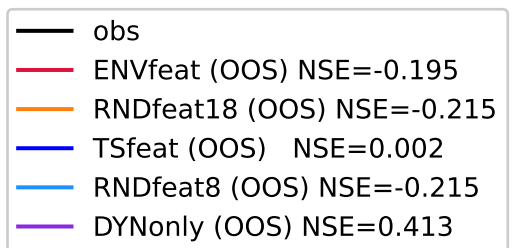

BW\_110-619-8

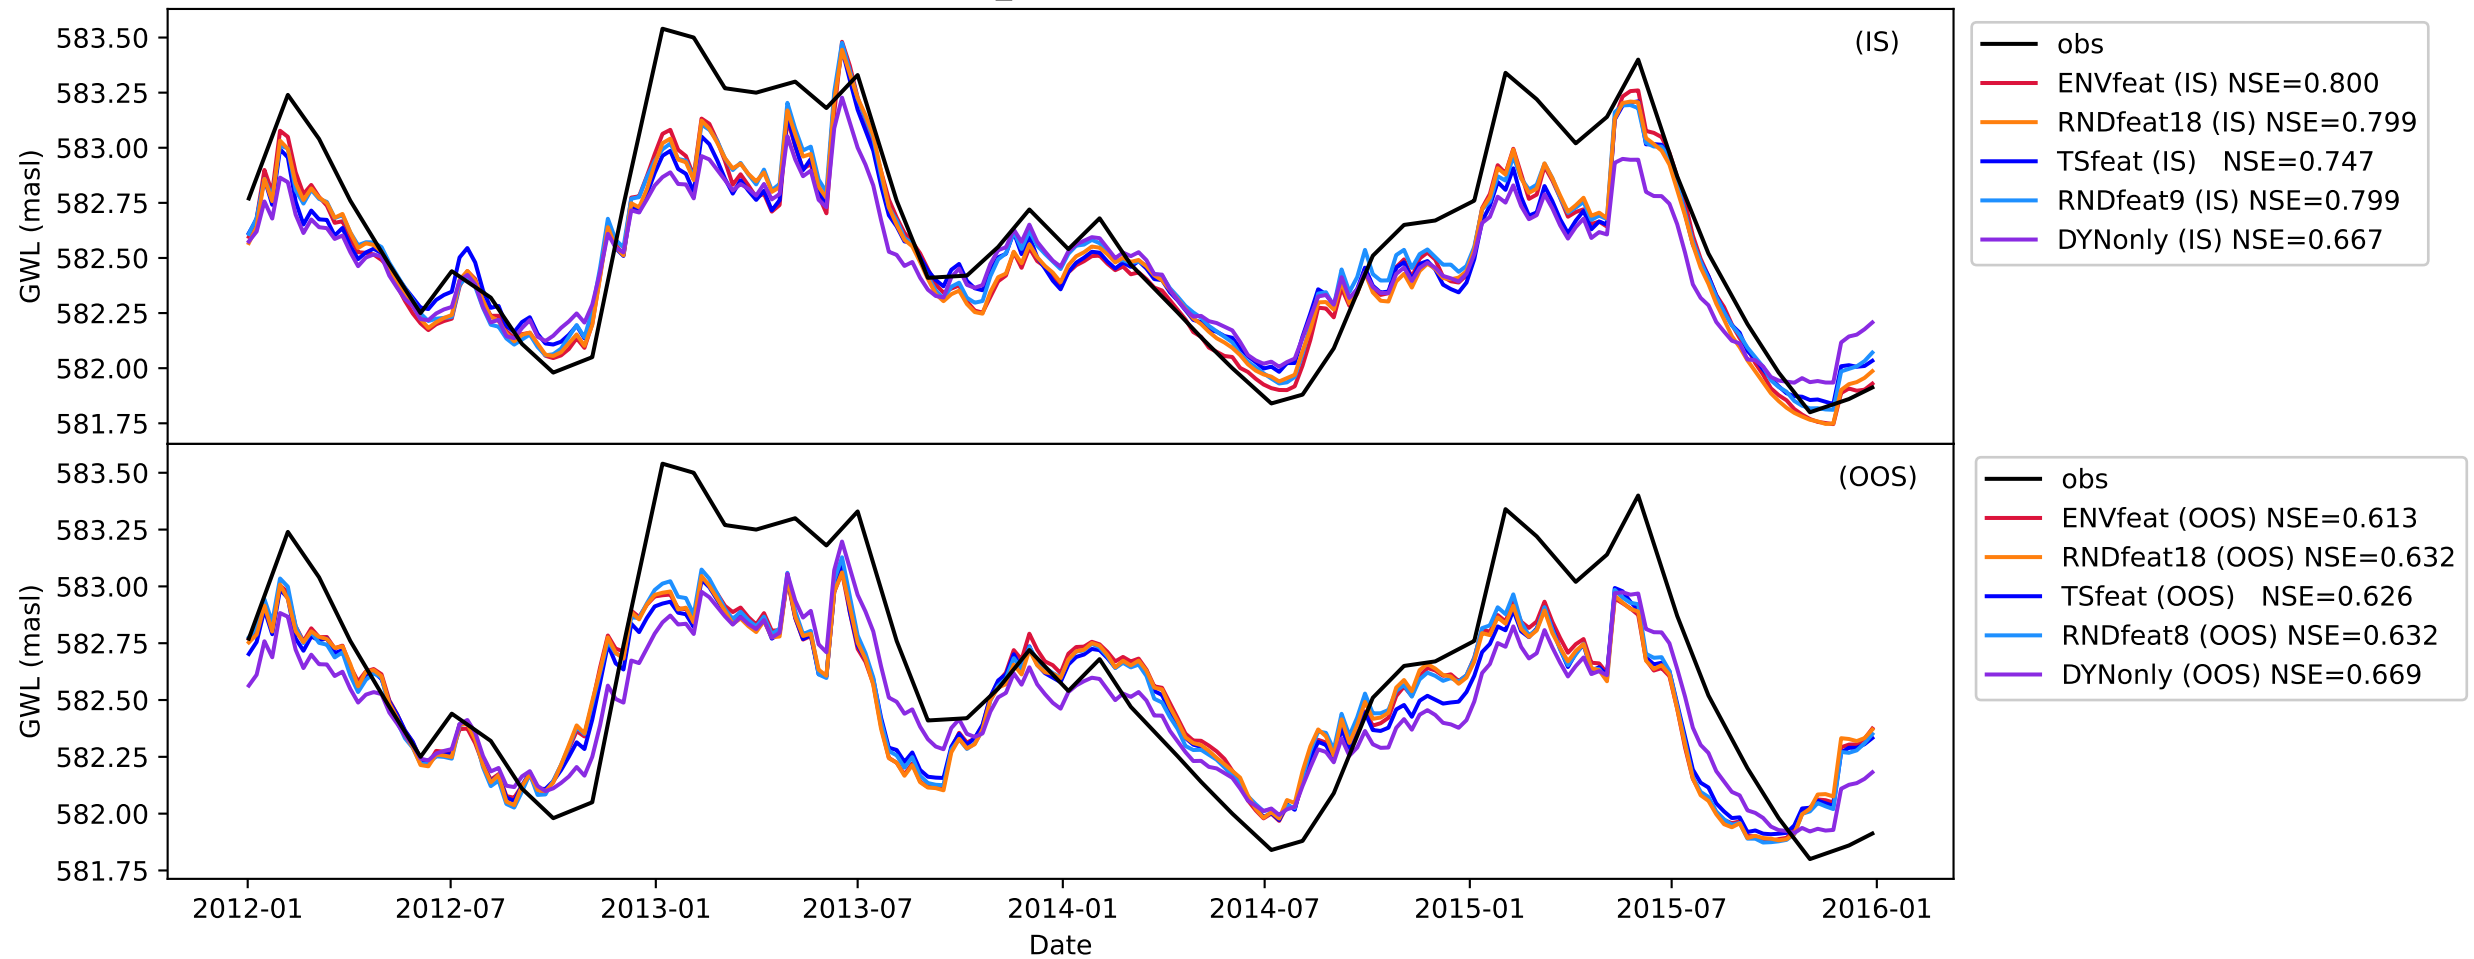



BW\_112-211-1

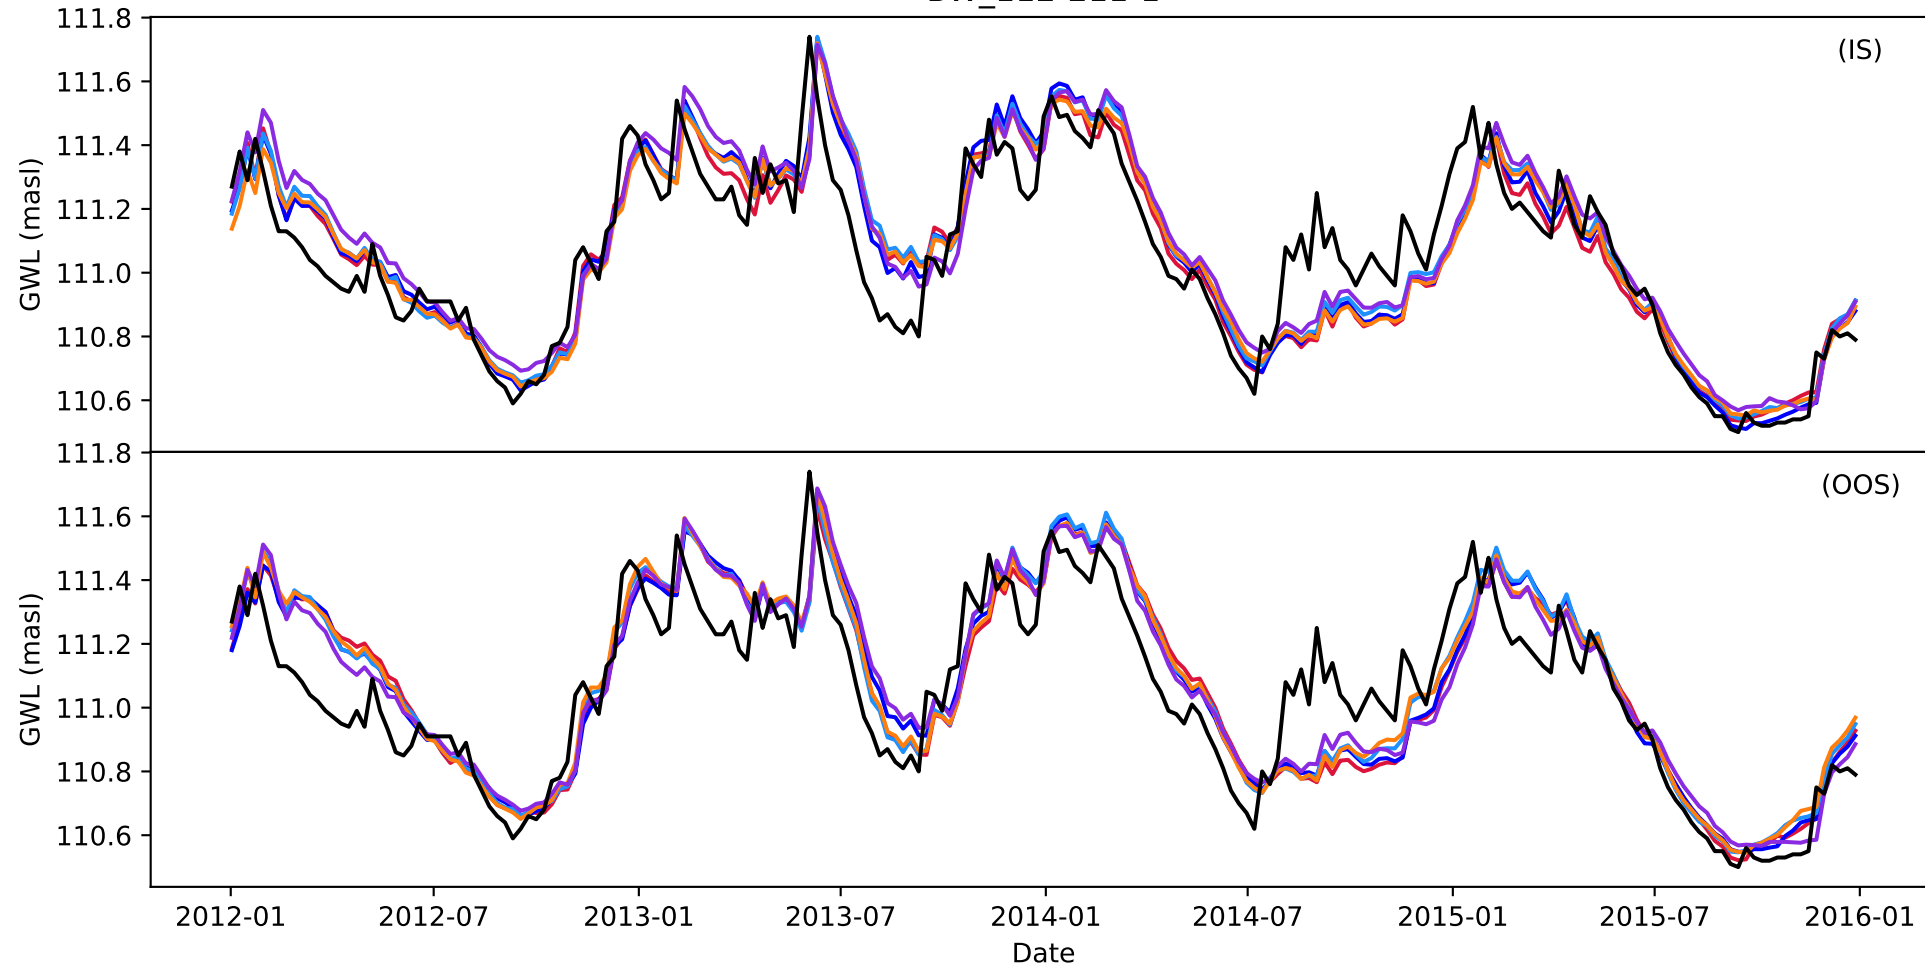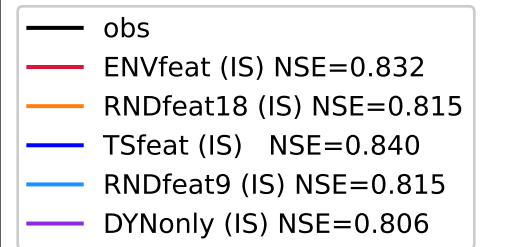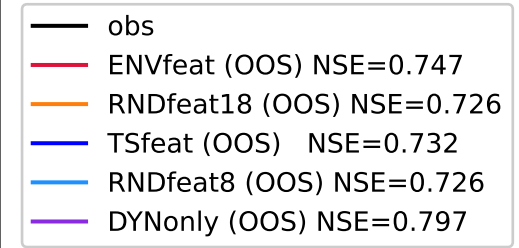

BW\_124-068-9

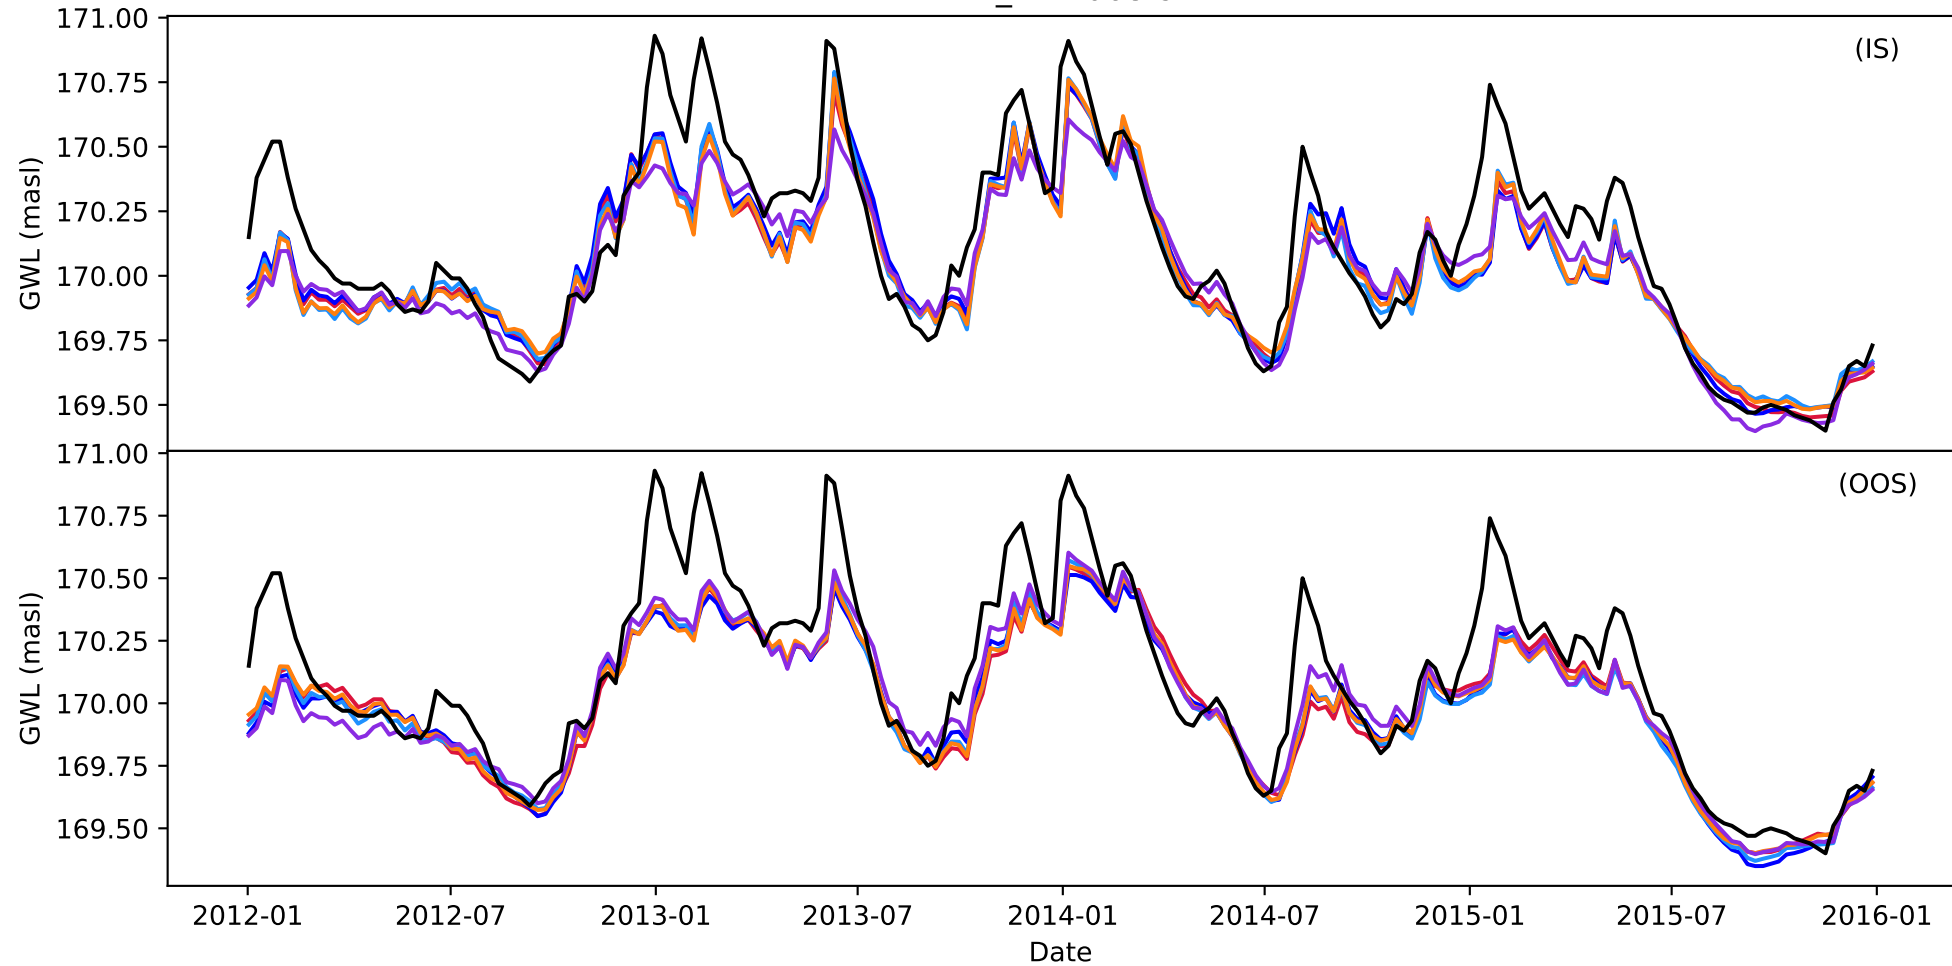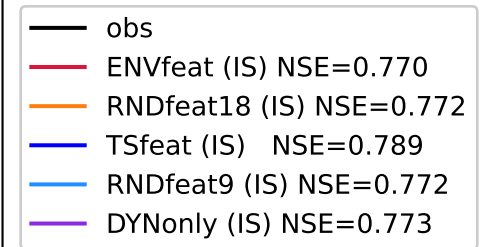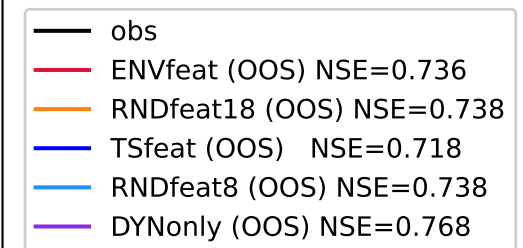

BW\_131-115-0

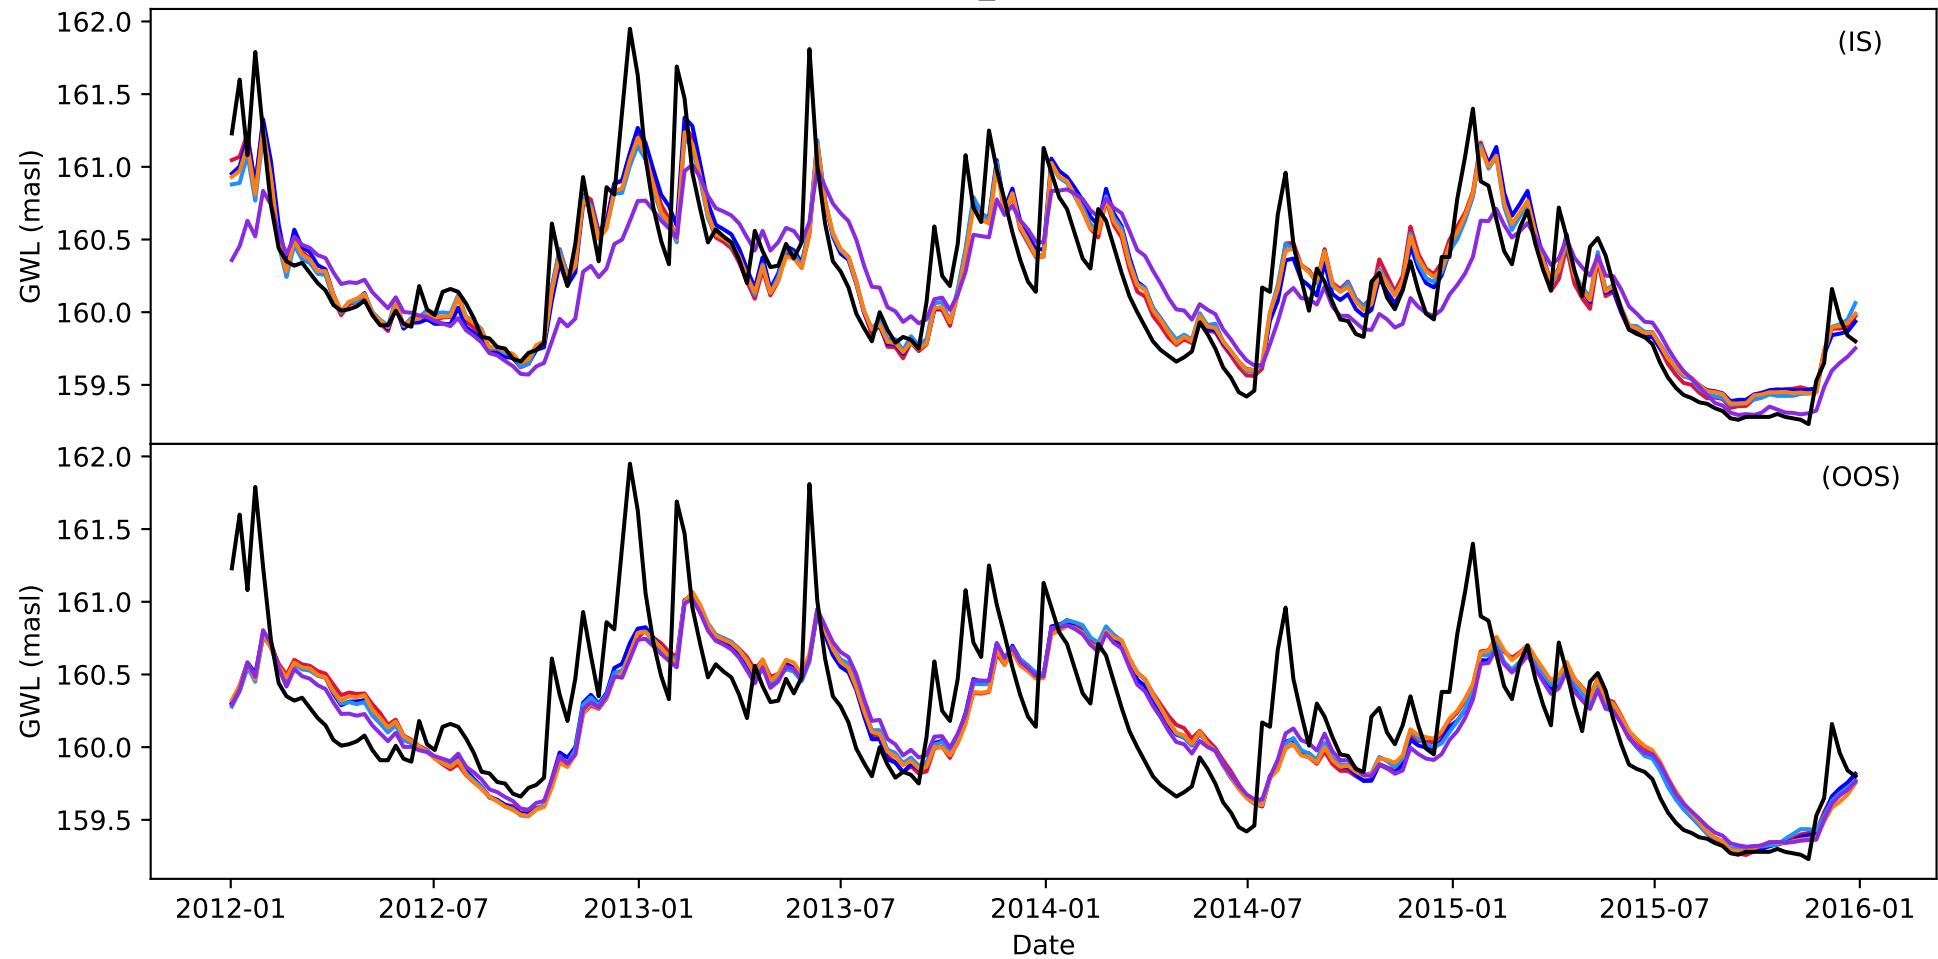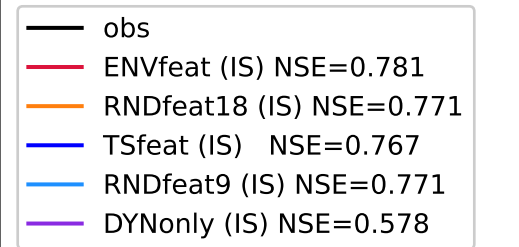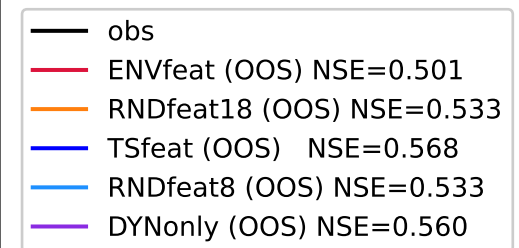

BW\_145-772-0

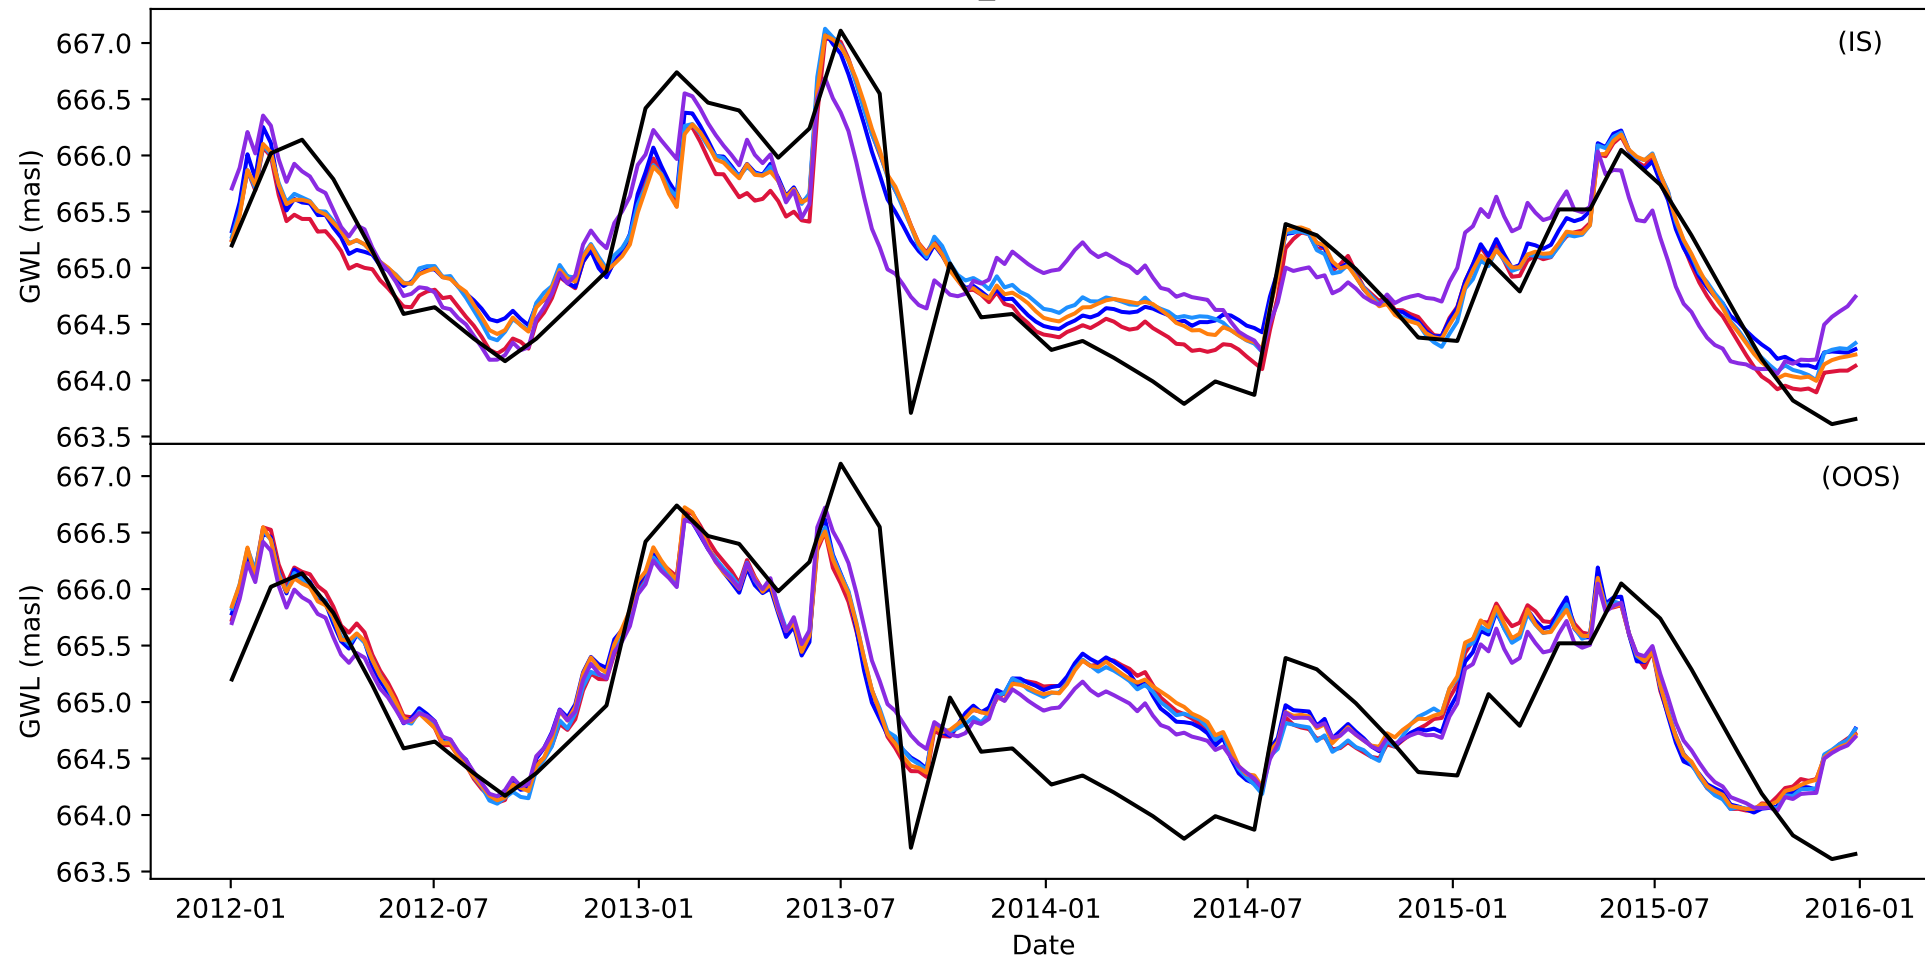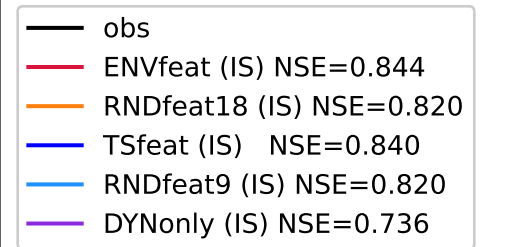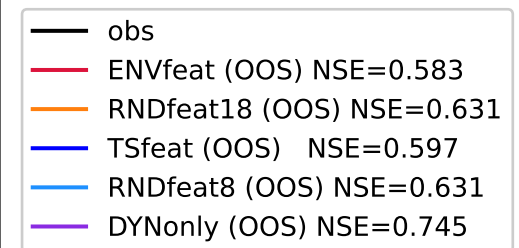

BW\_194-069-9

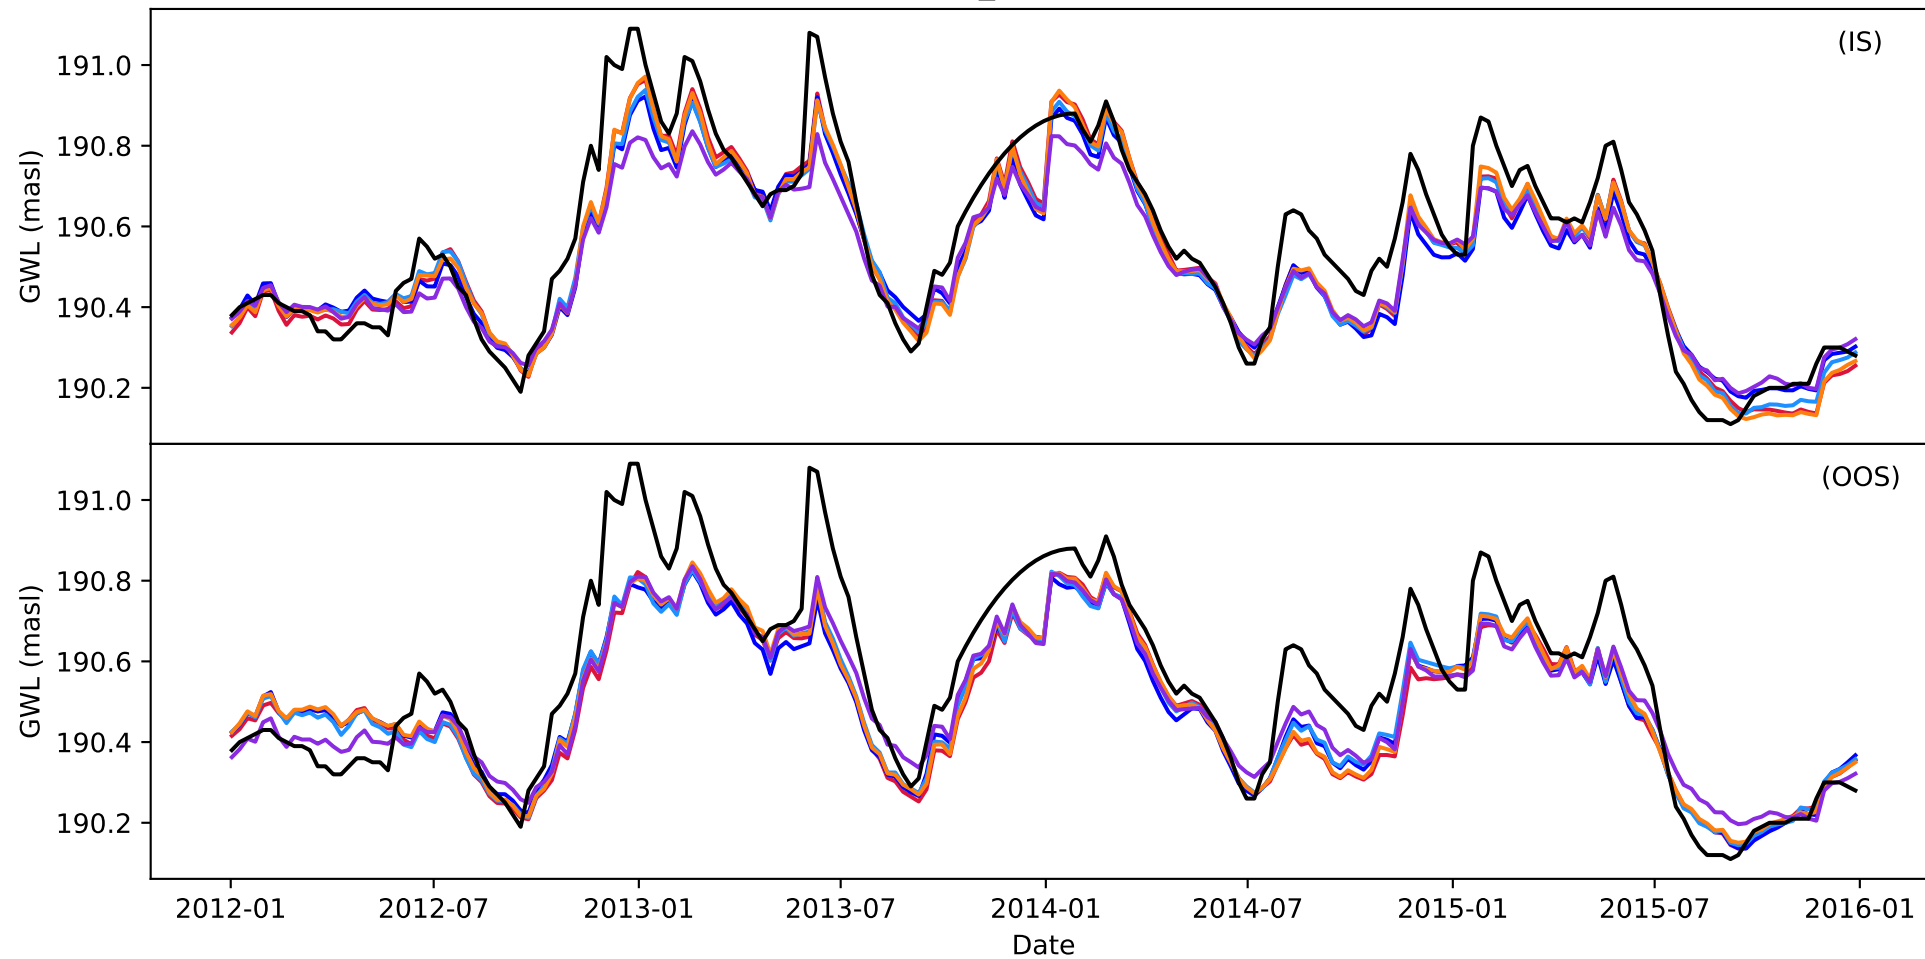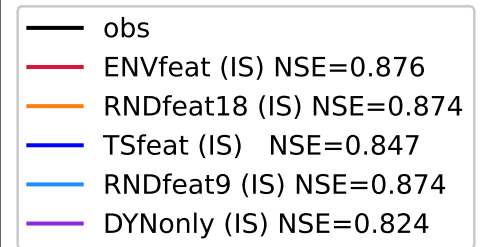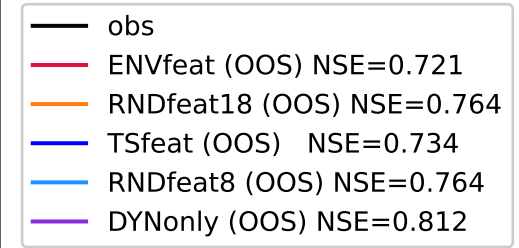

BY\_3108

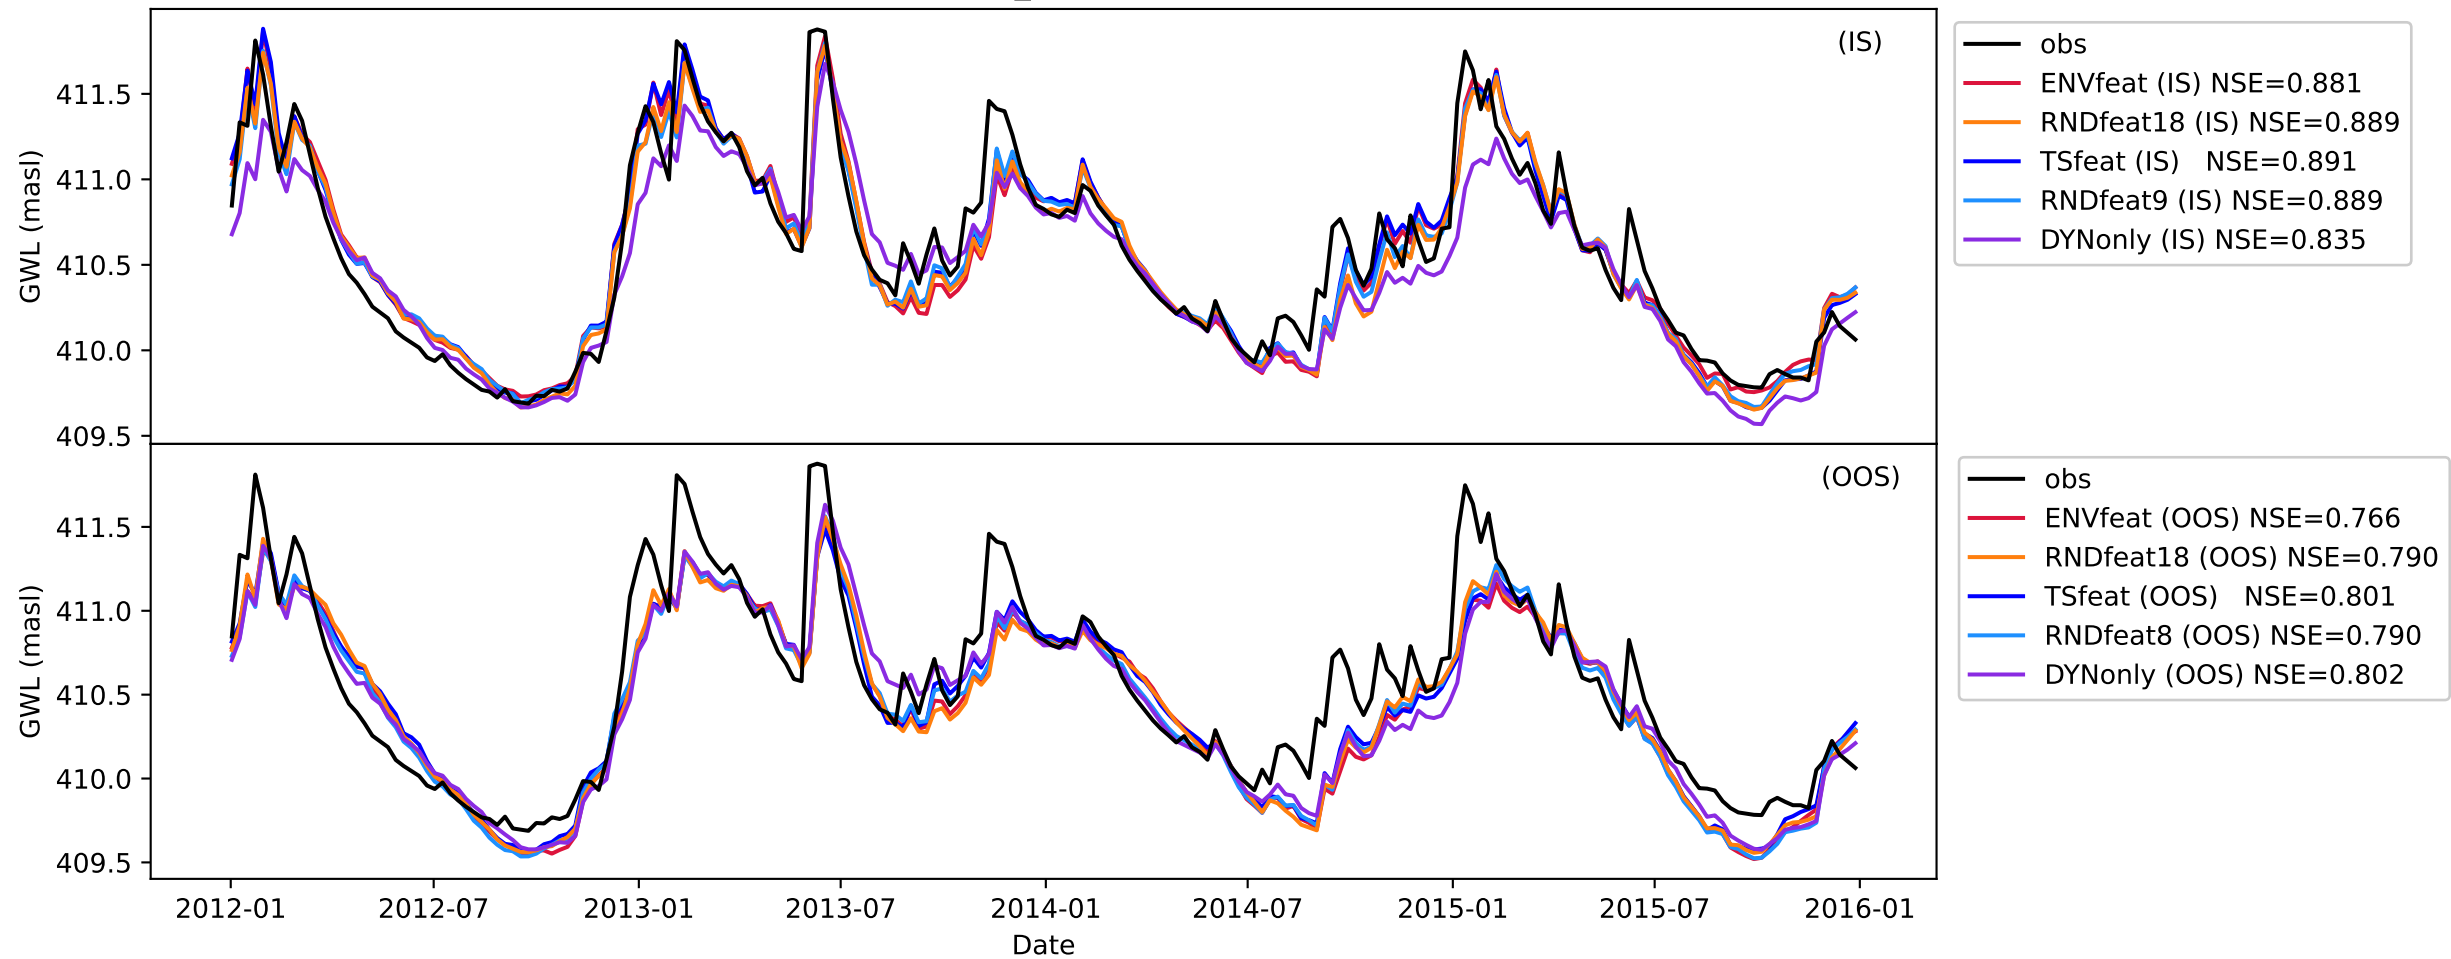

# BY\_5158

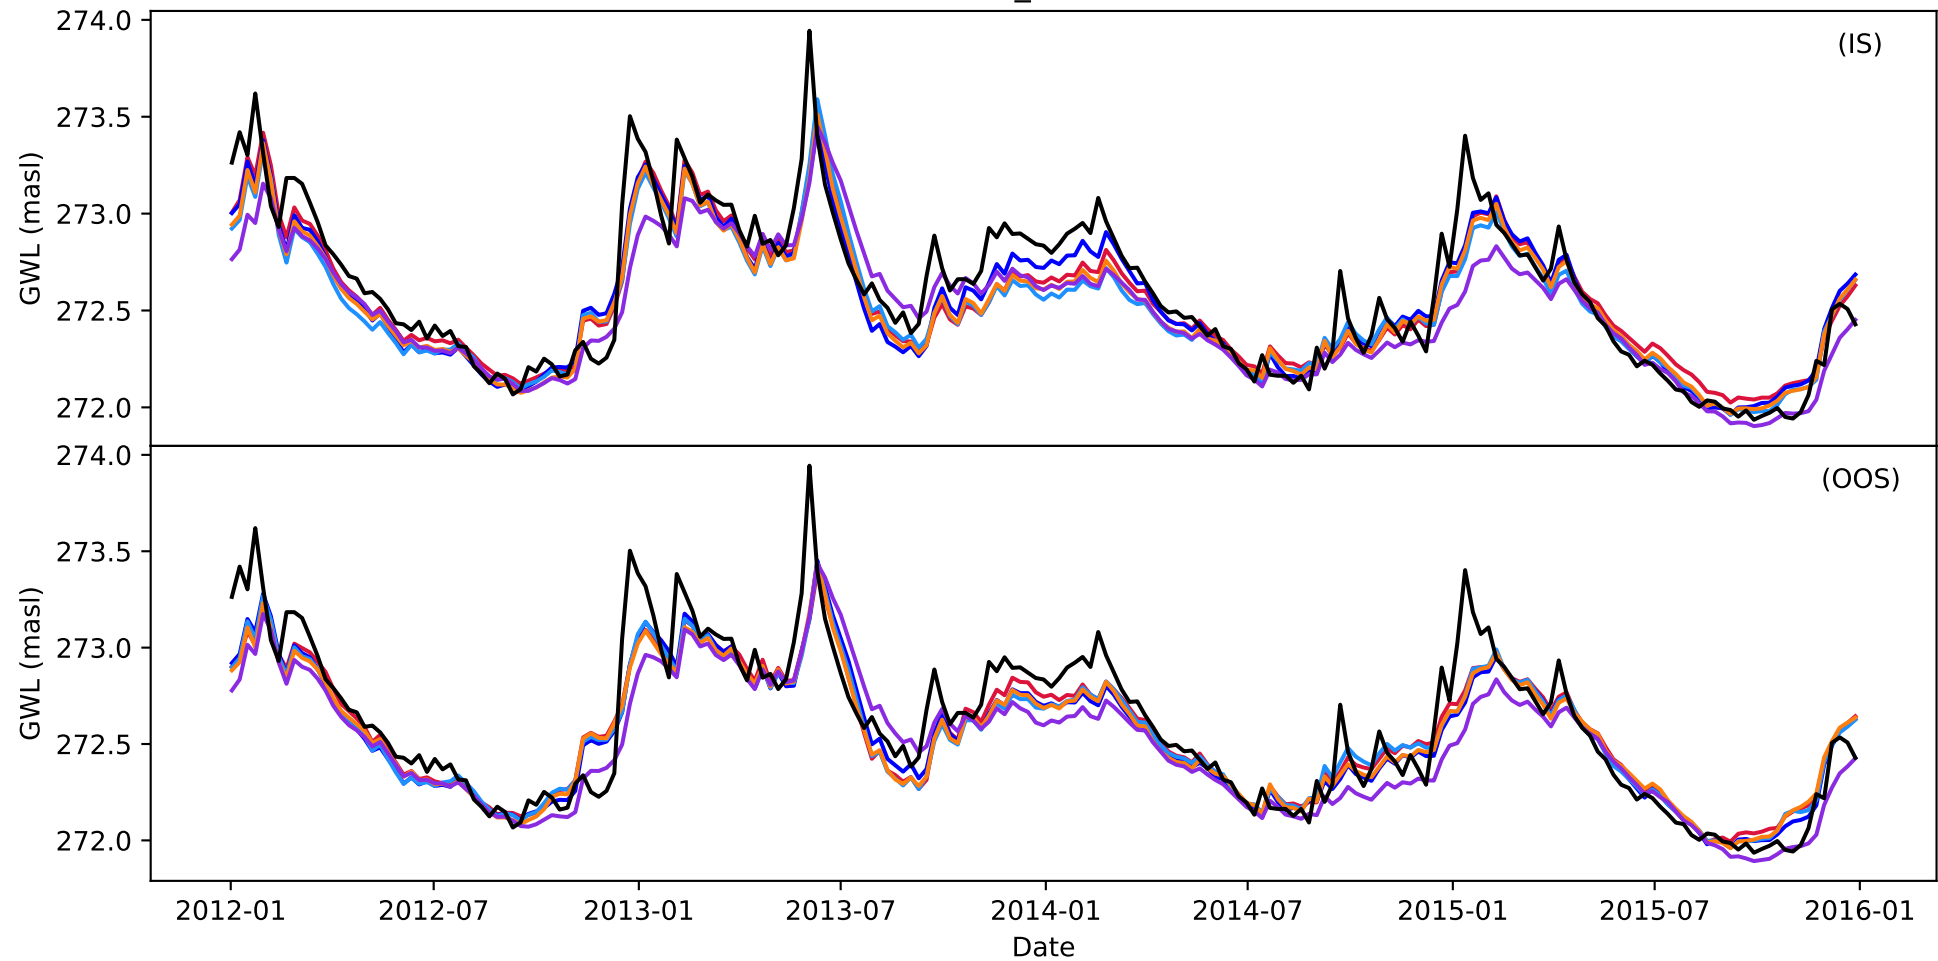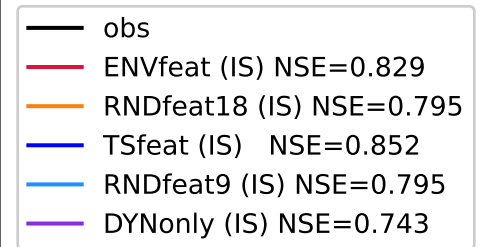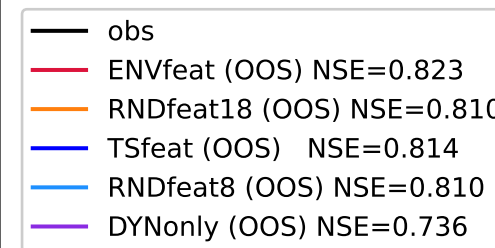

BY\_5162

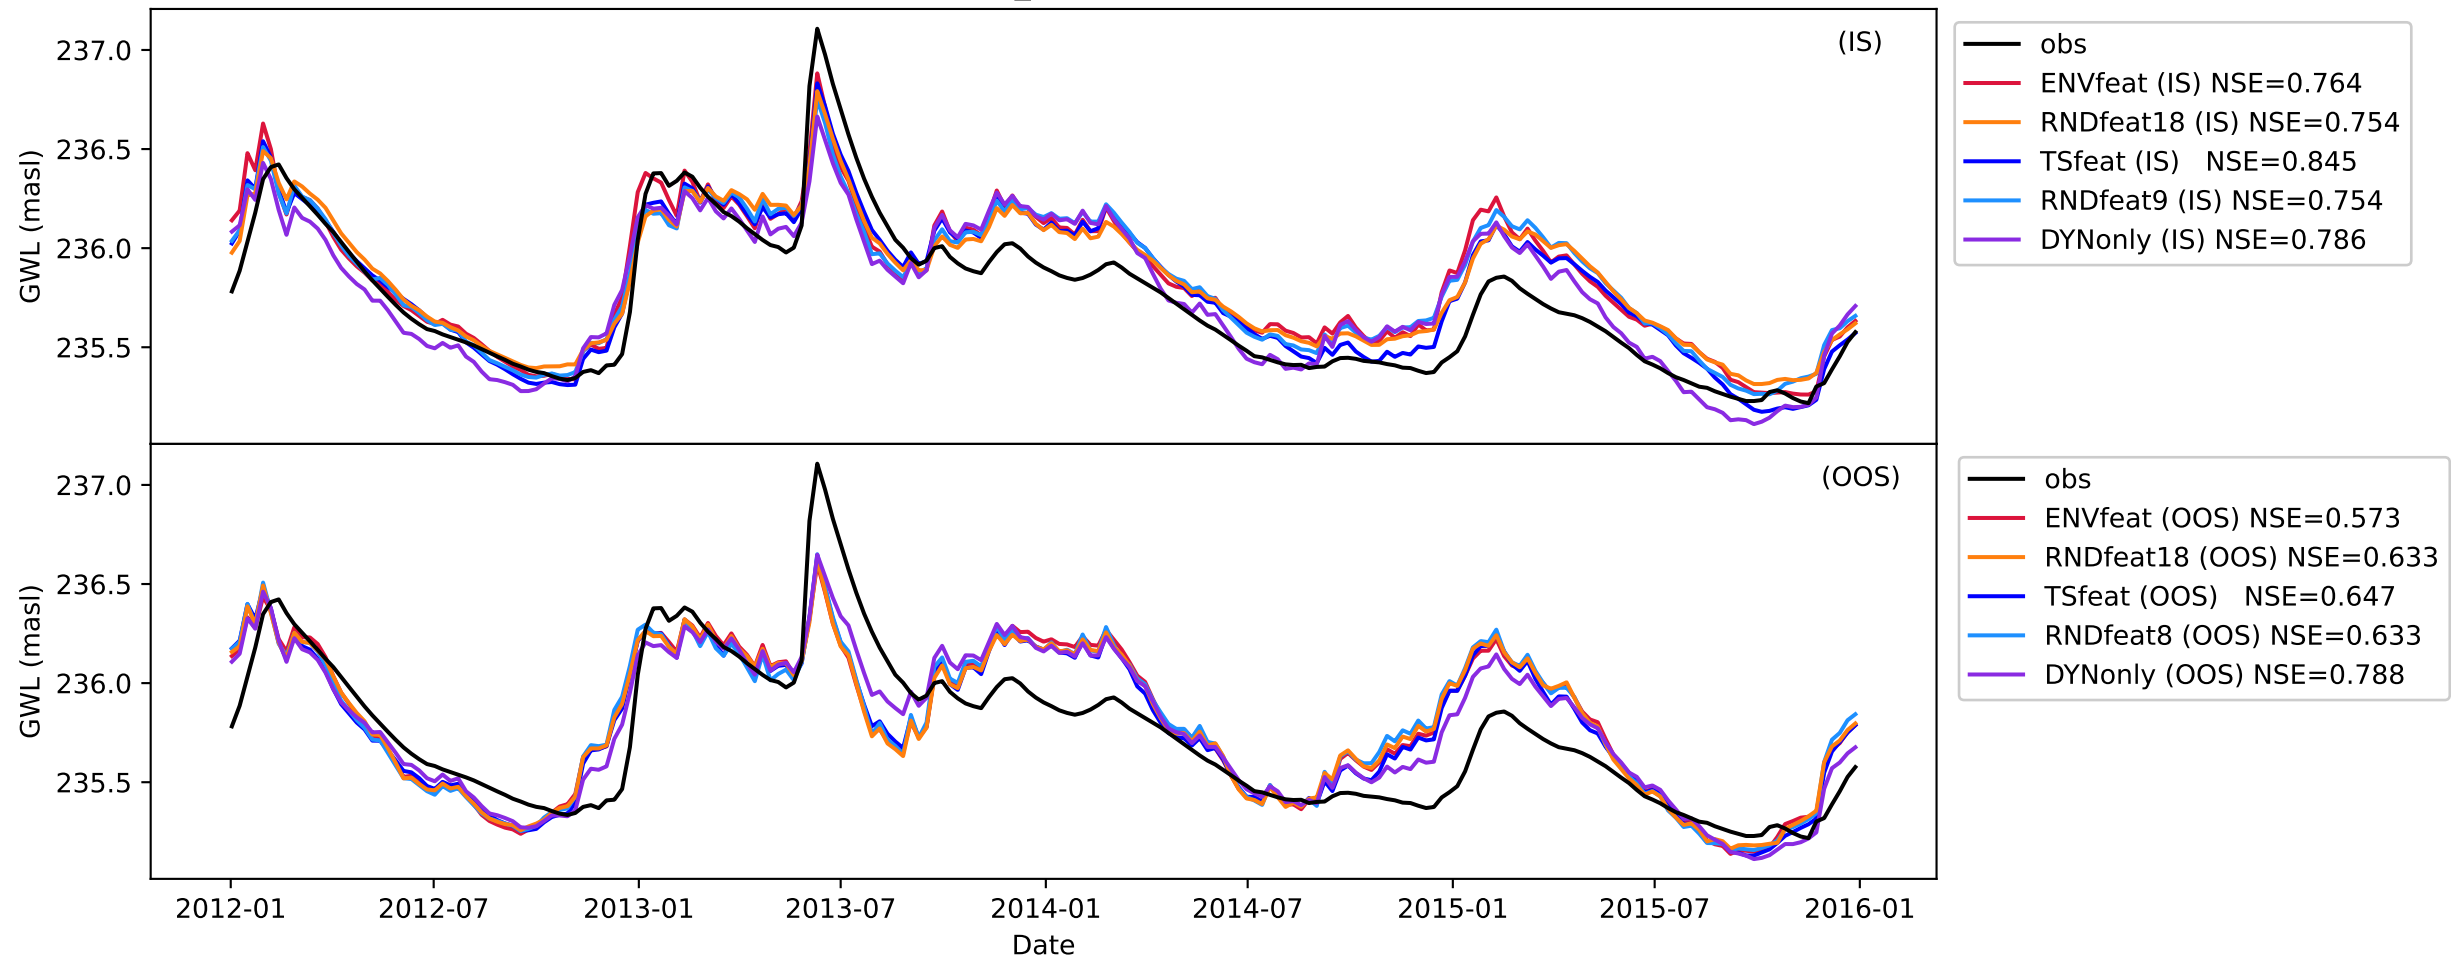



BY\_7126

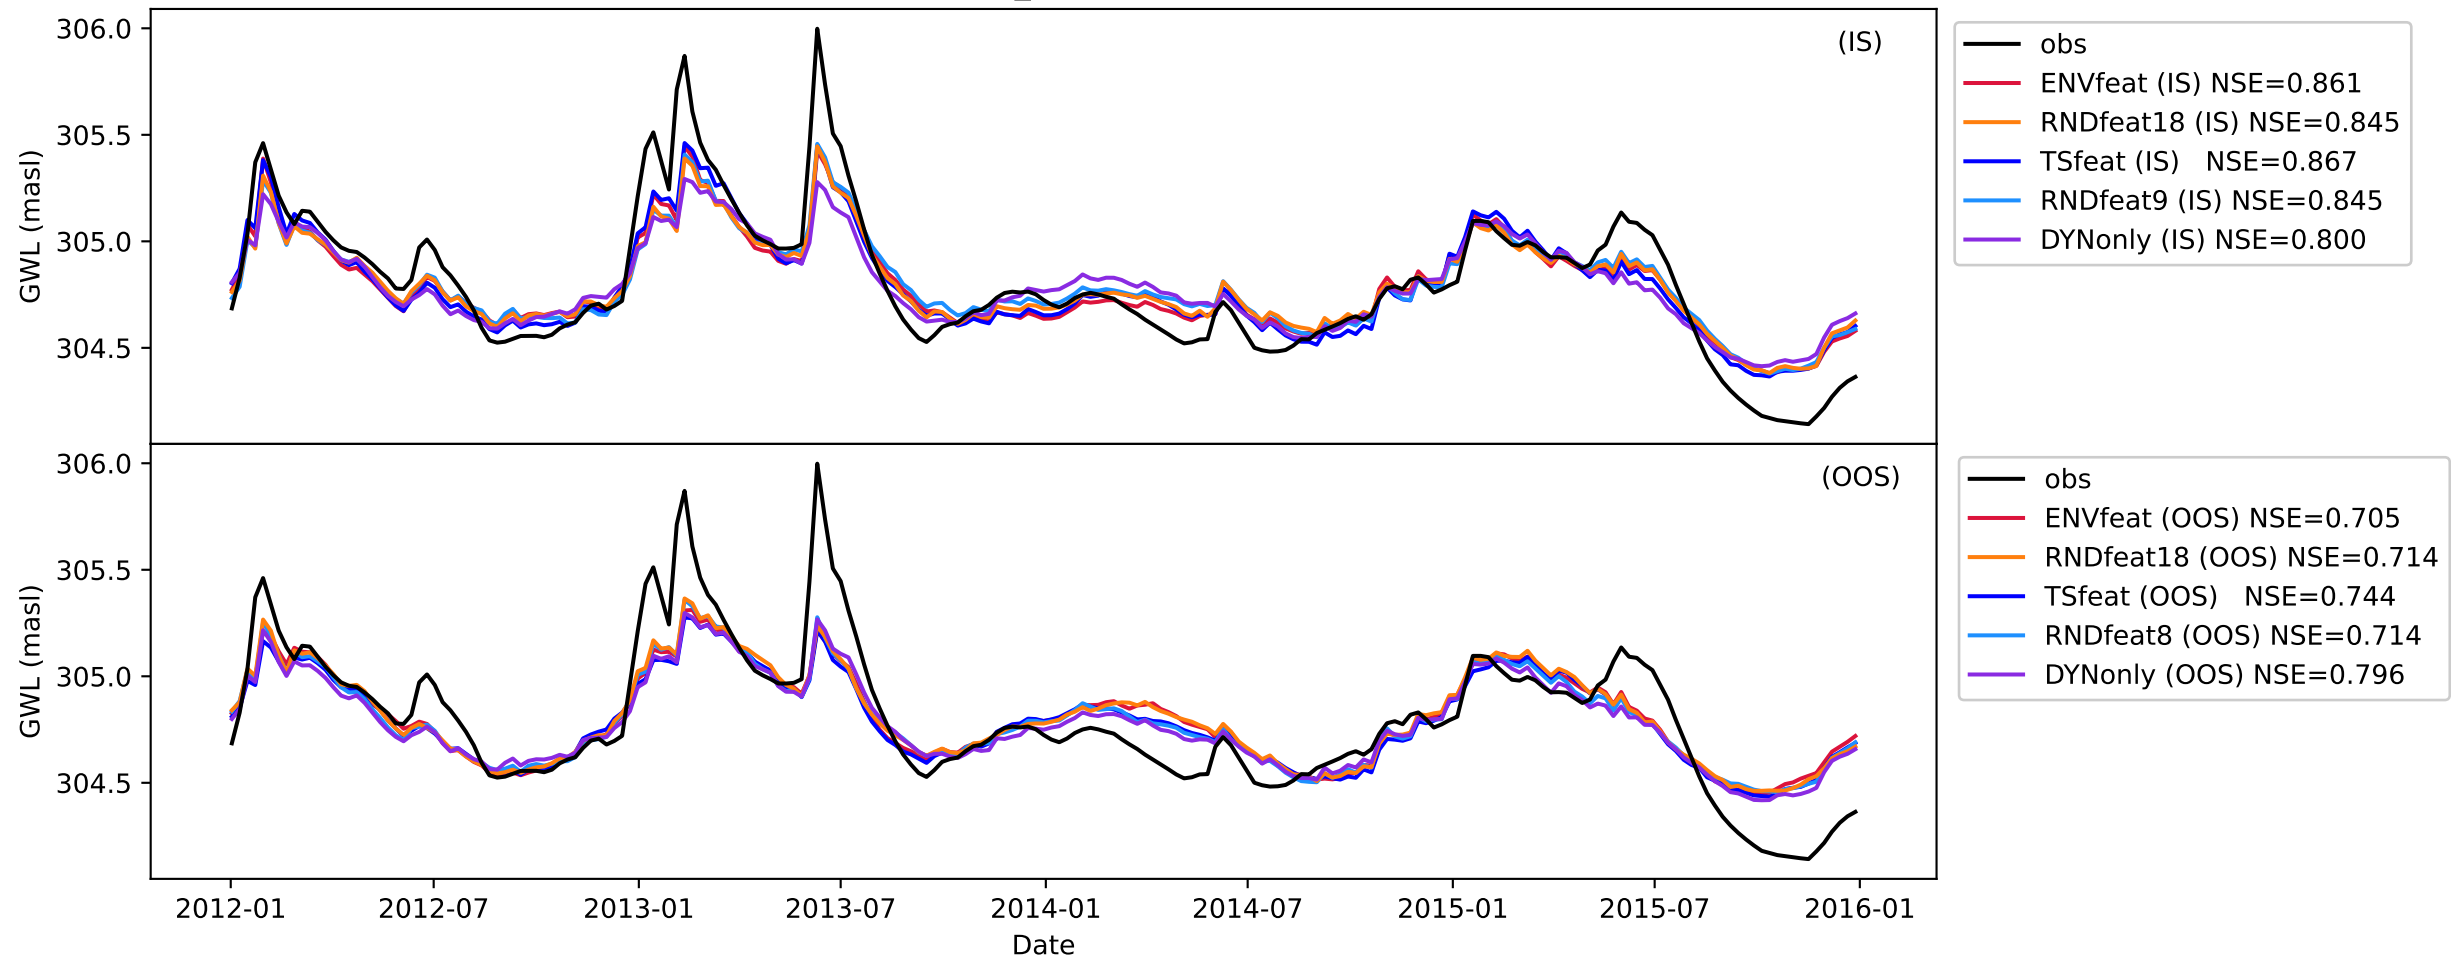

BY\_8252

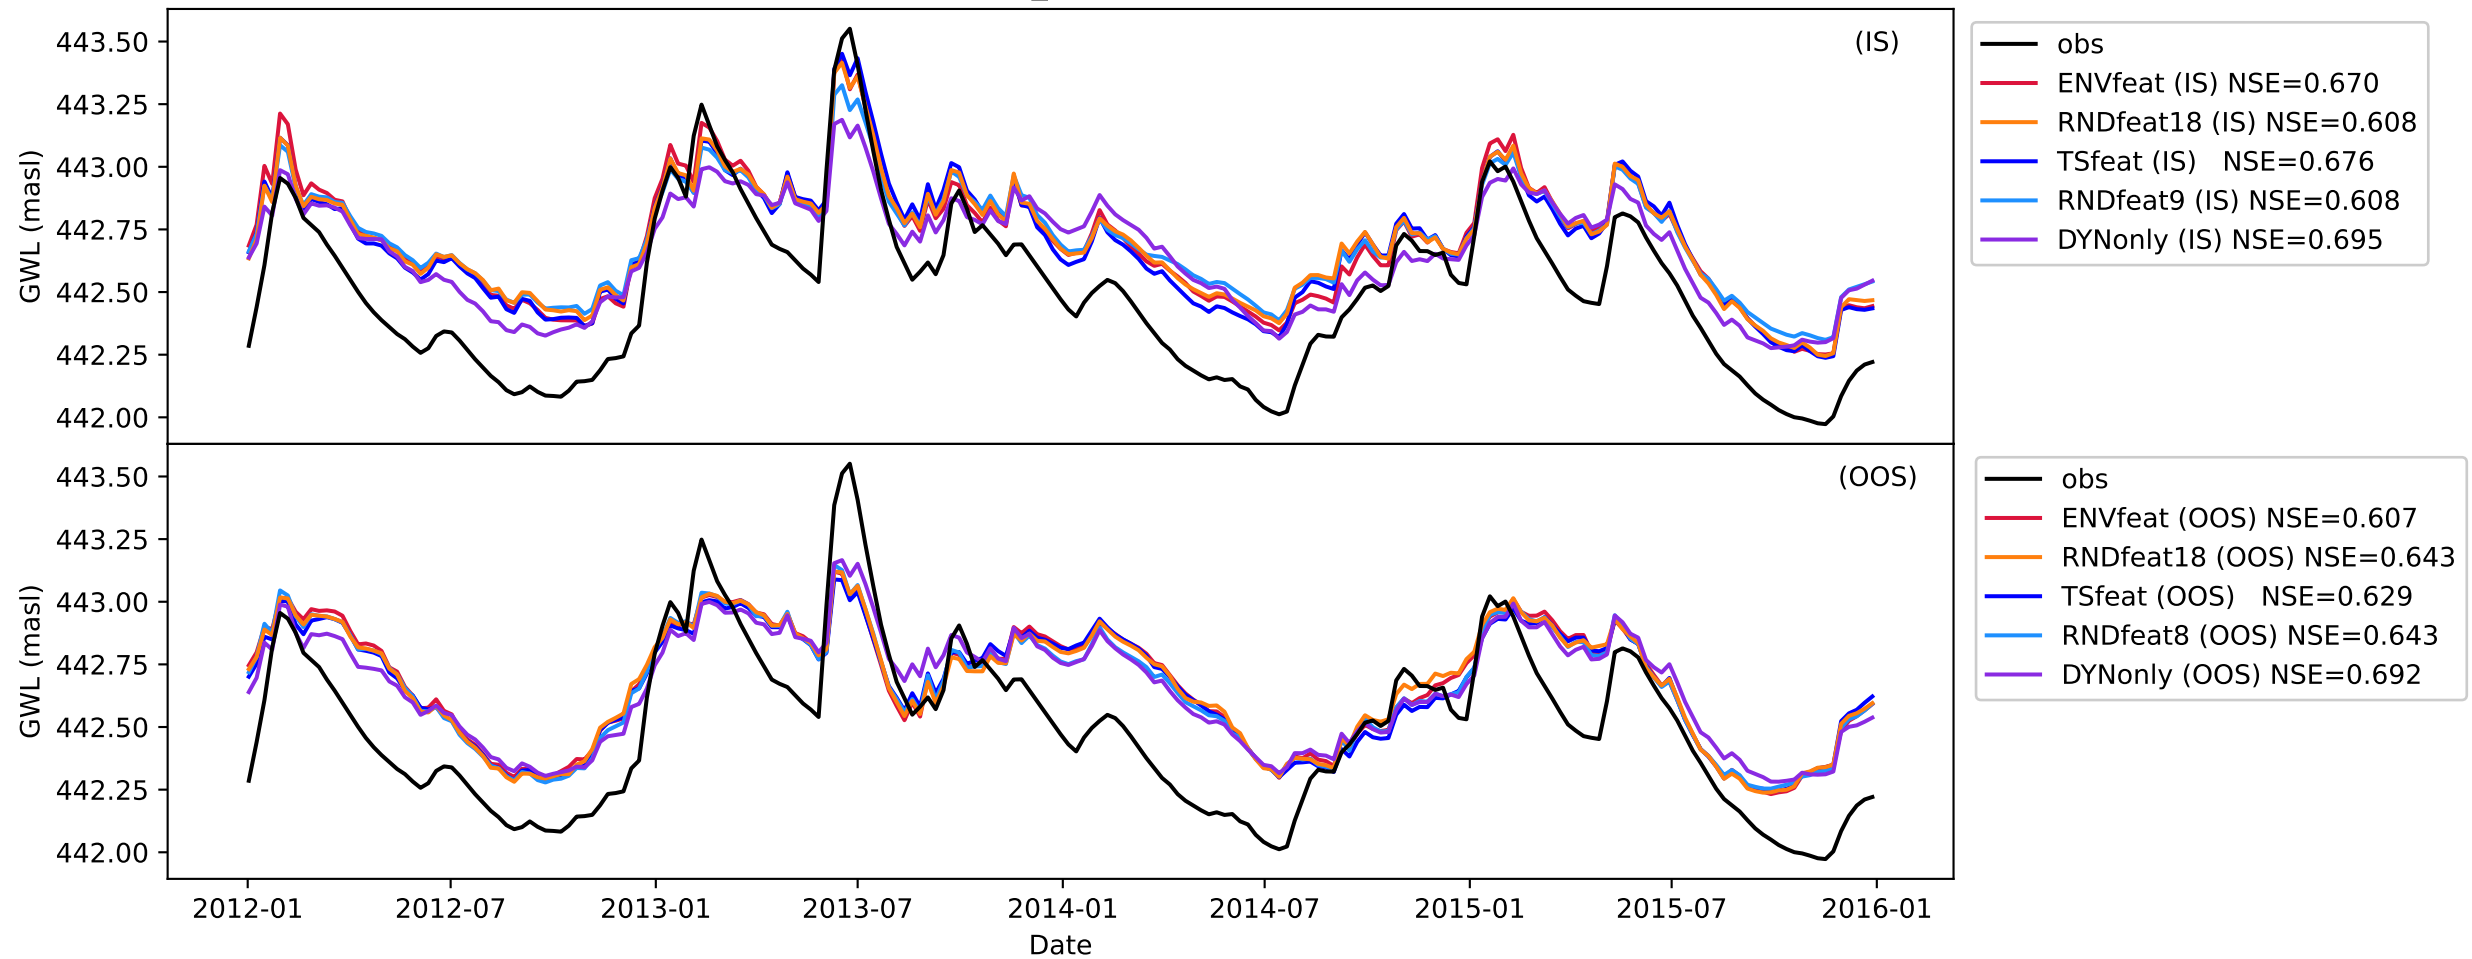

BY\_9275

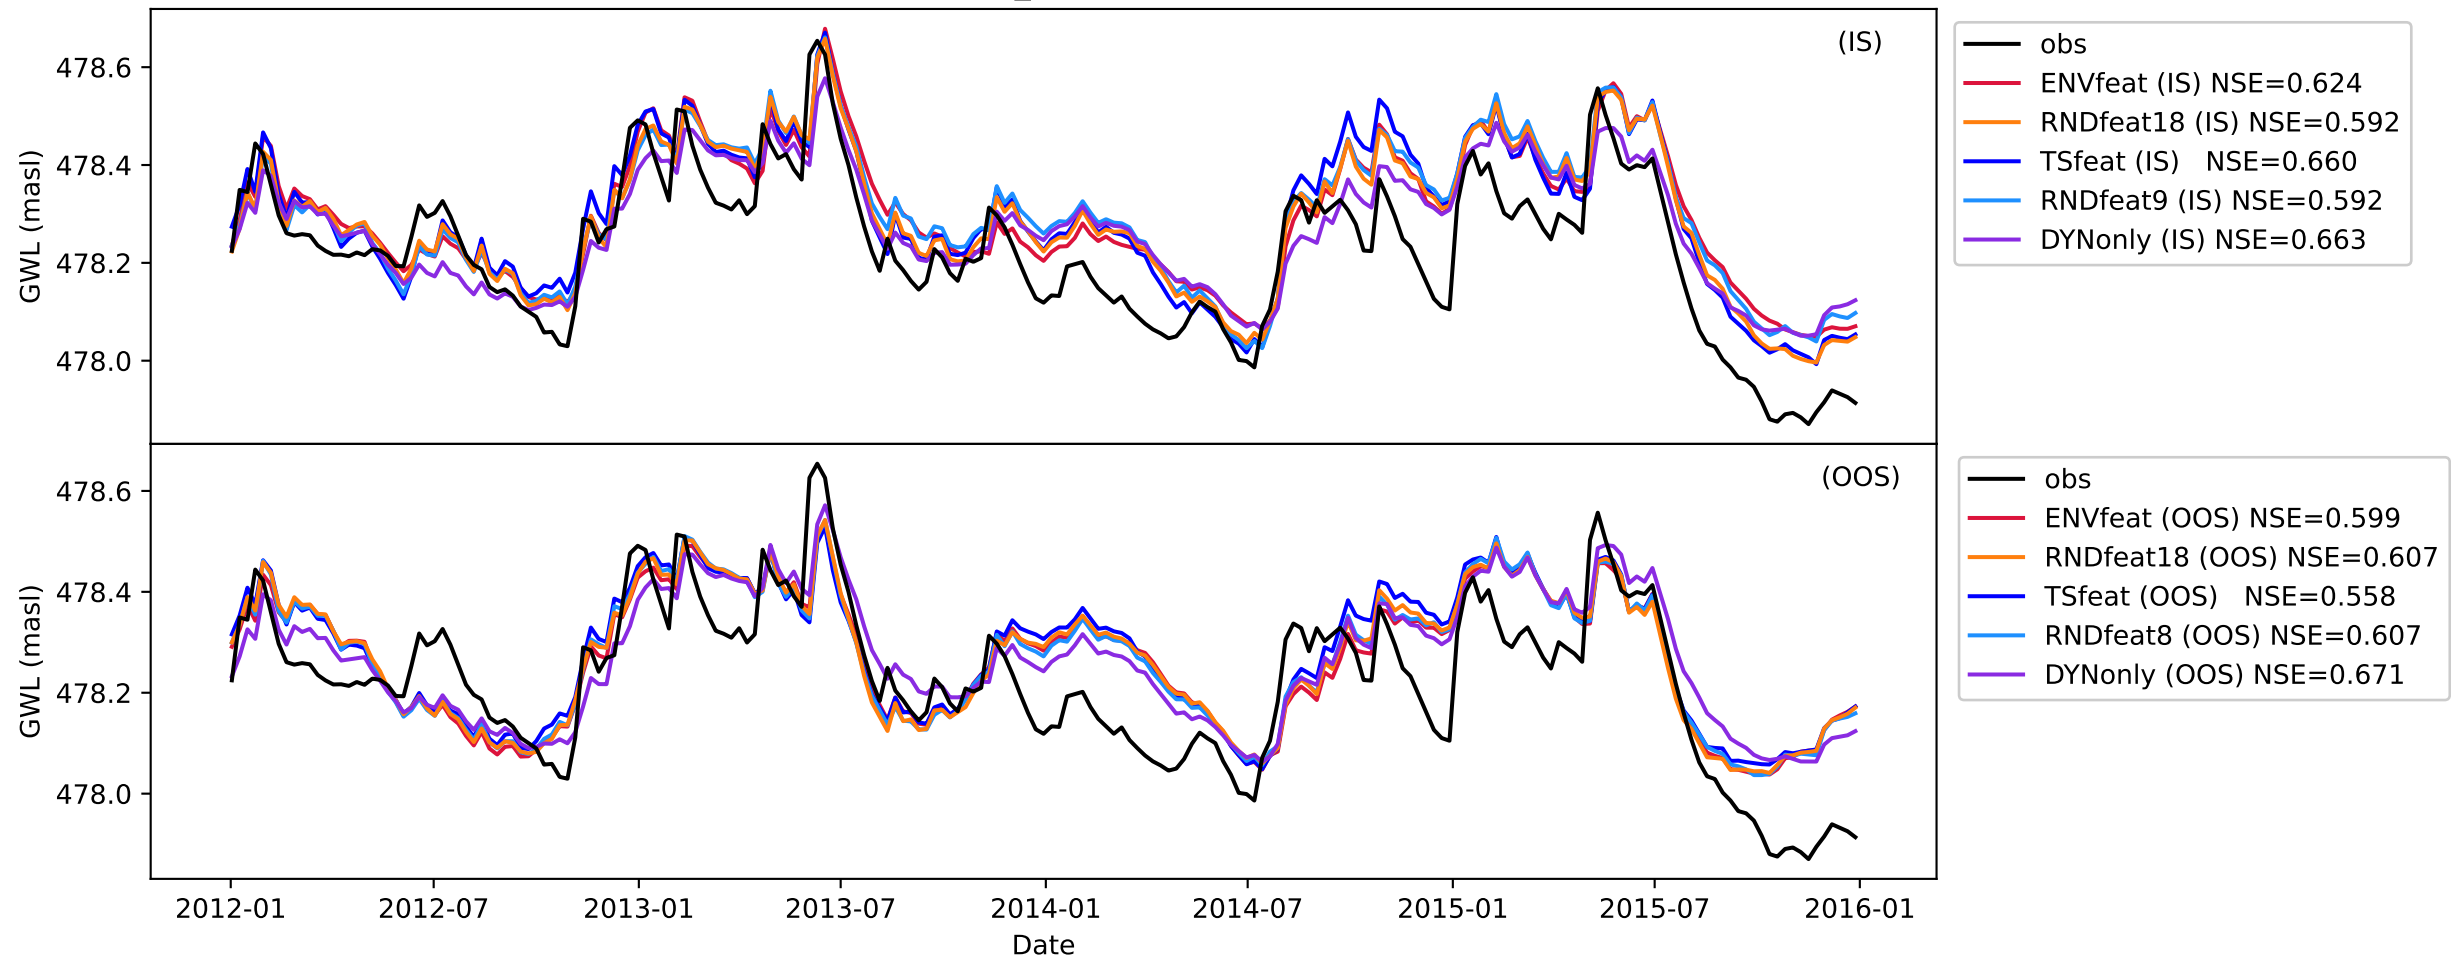

BY\_11119

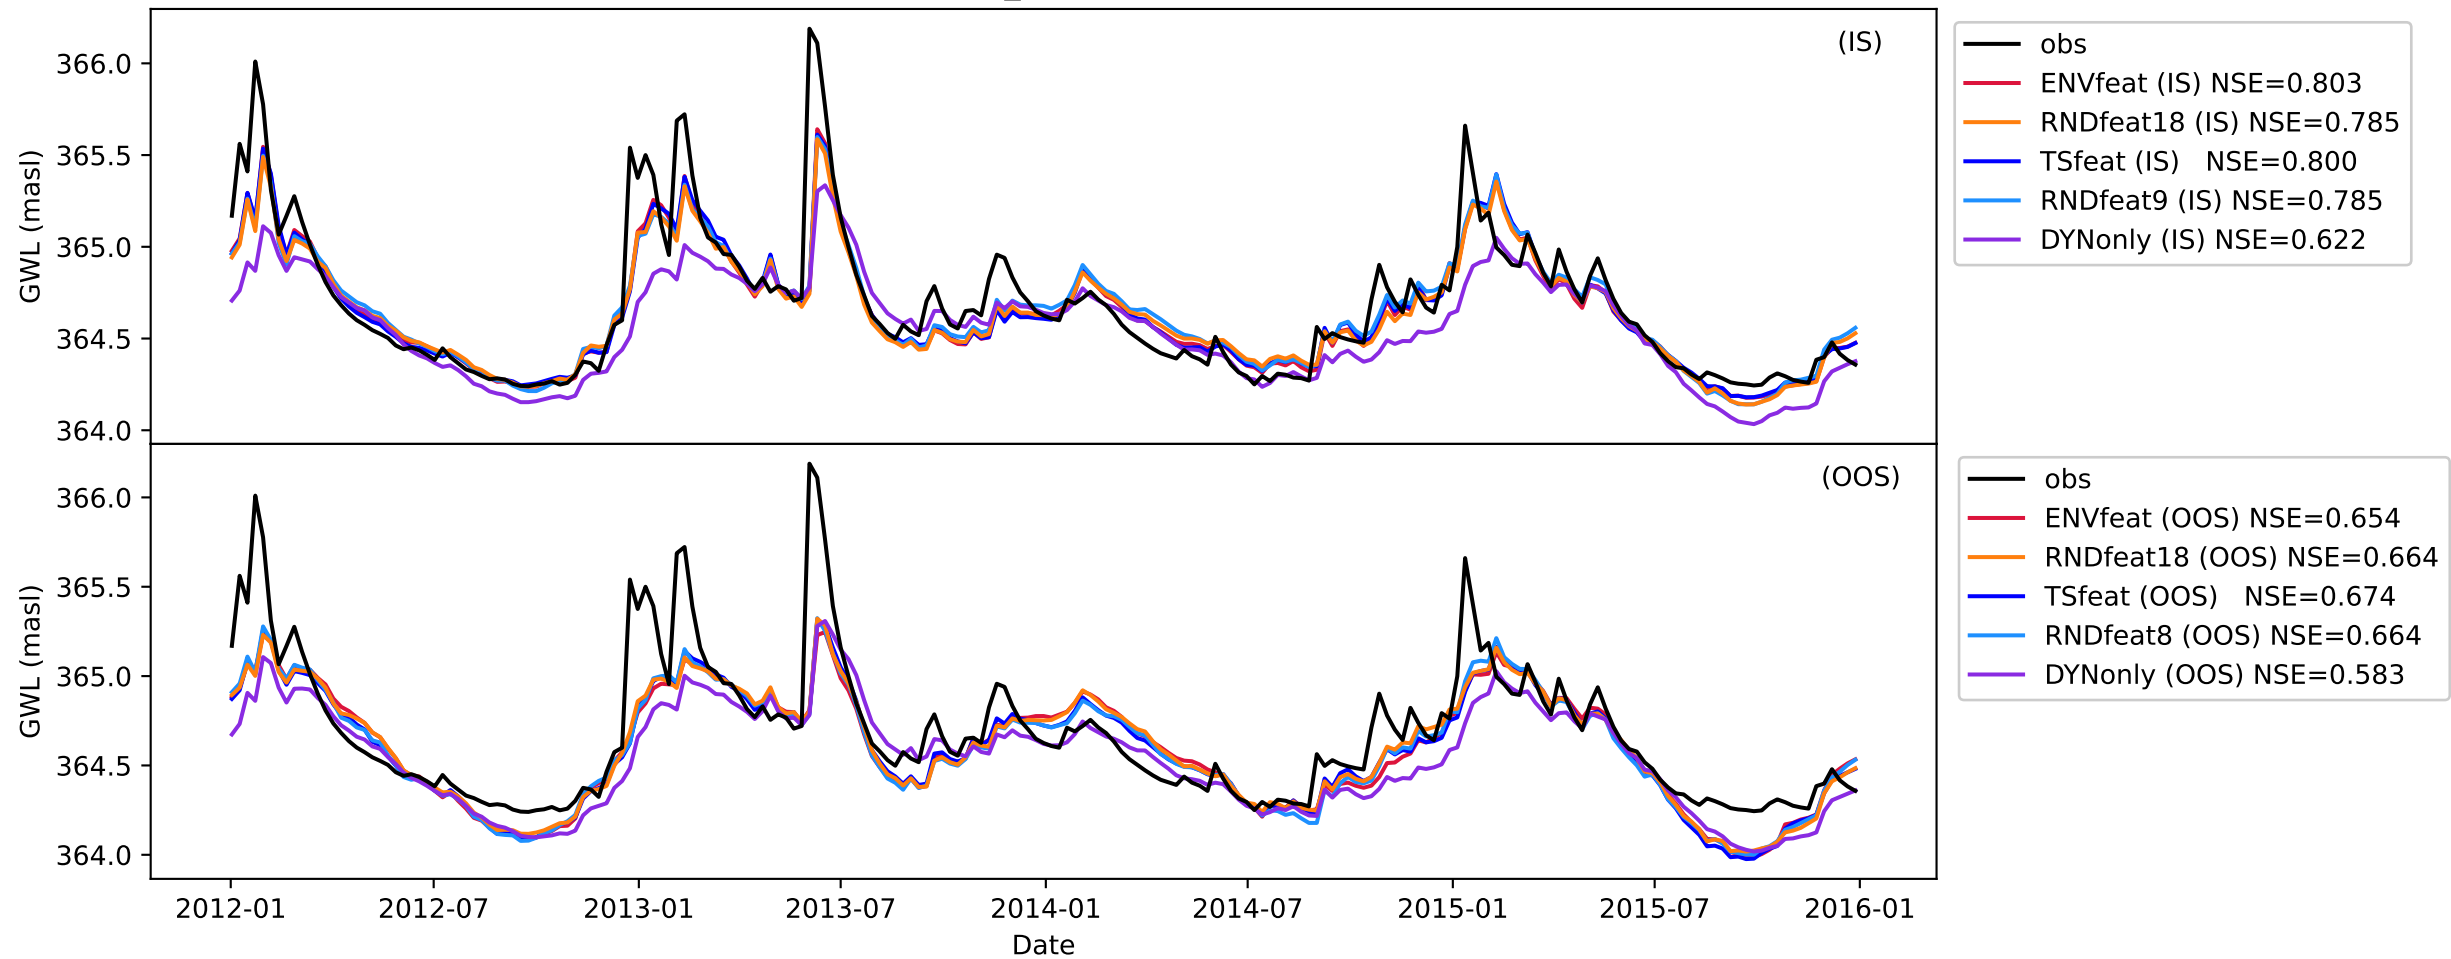

BY\_13126

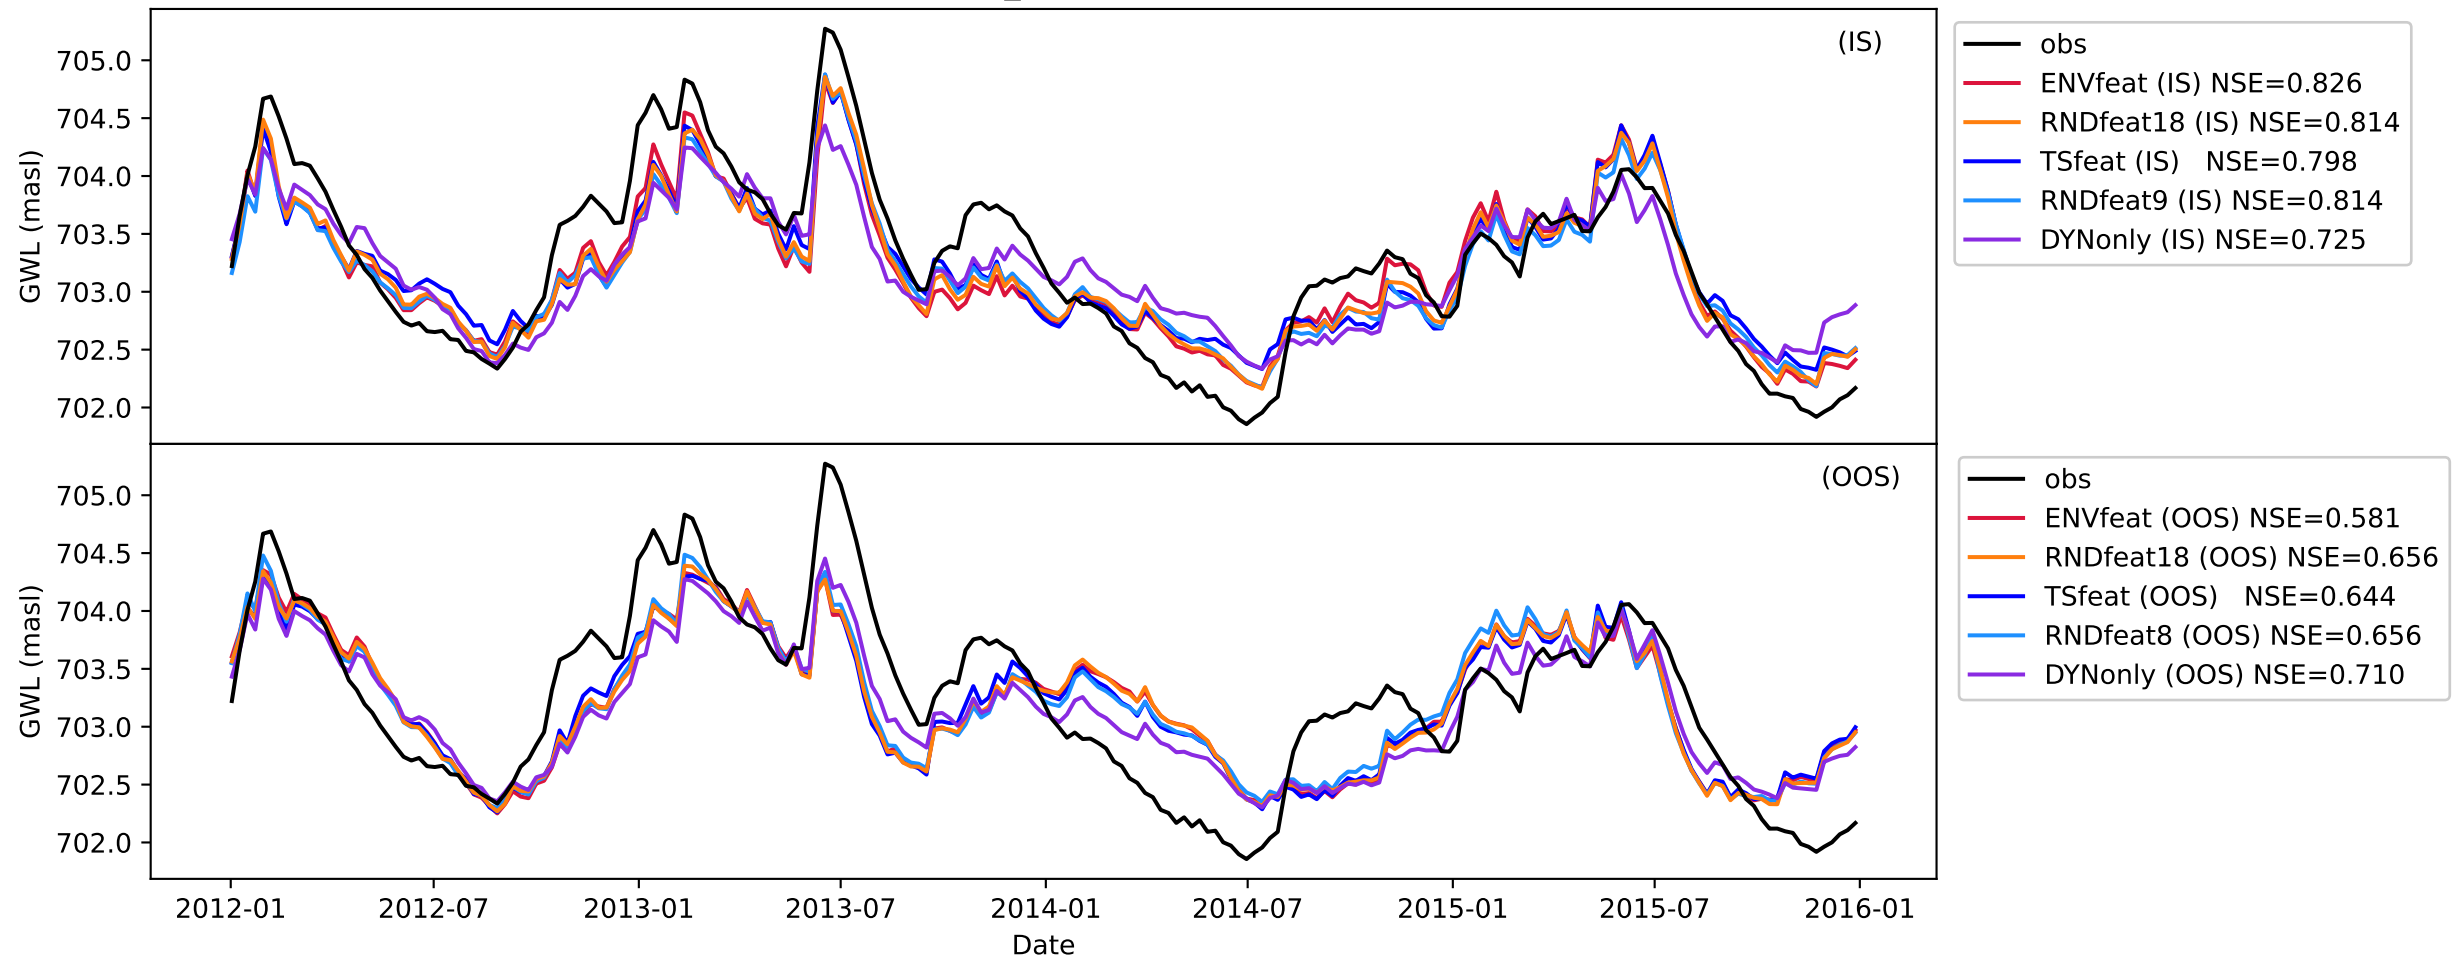

## BY\_15120

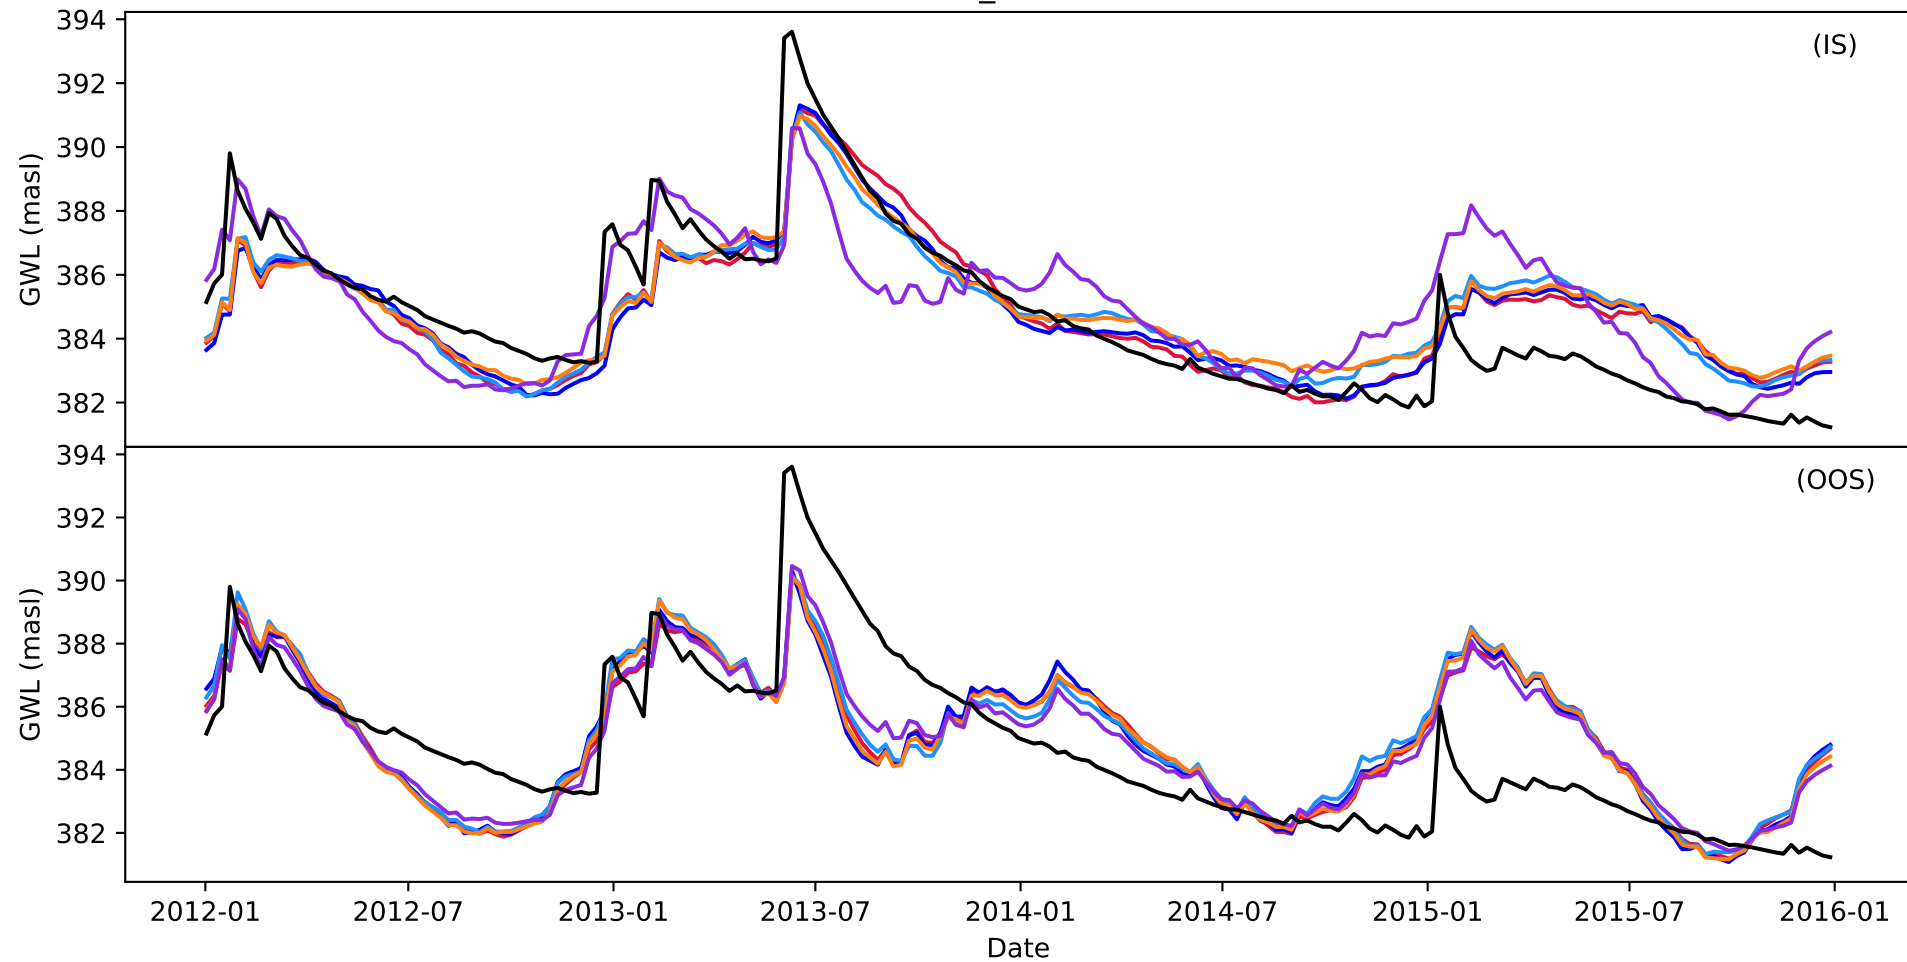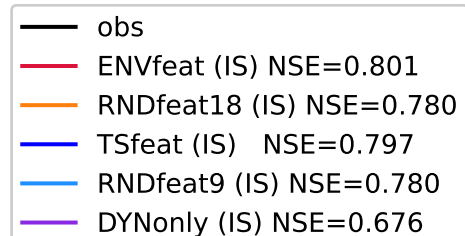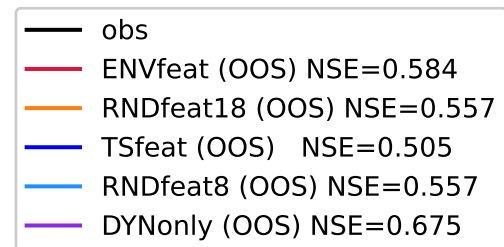

BY\_22008

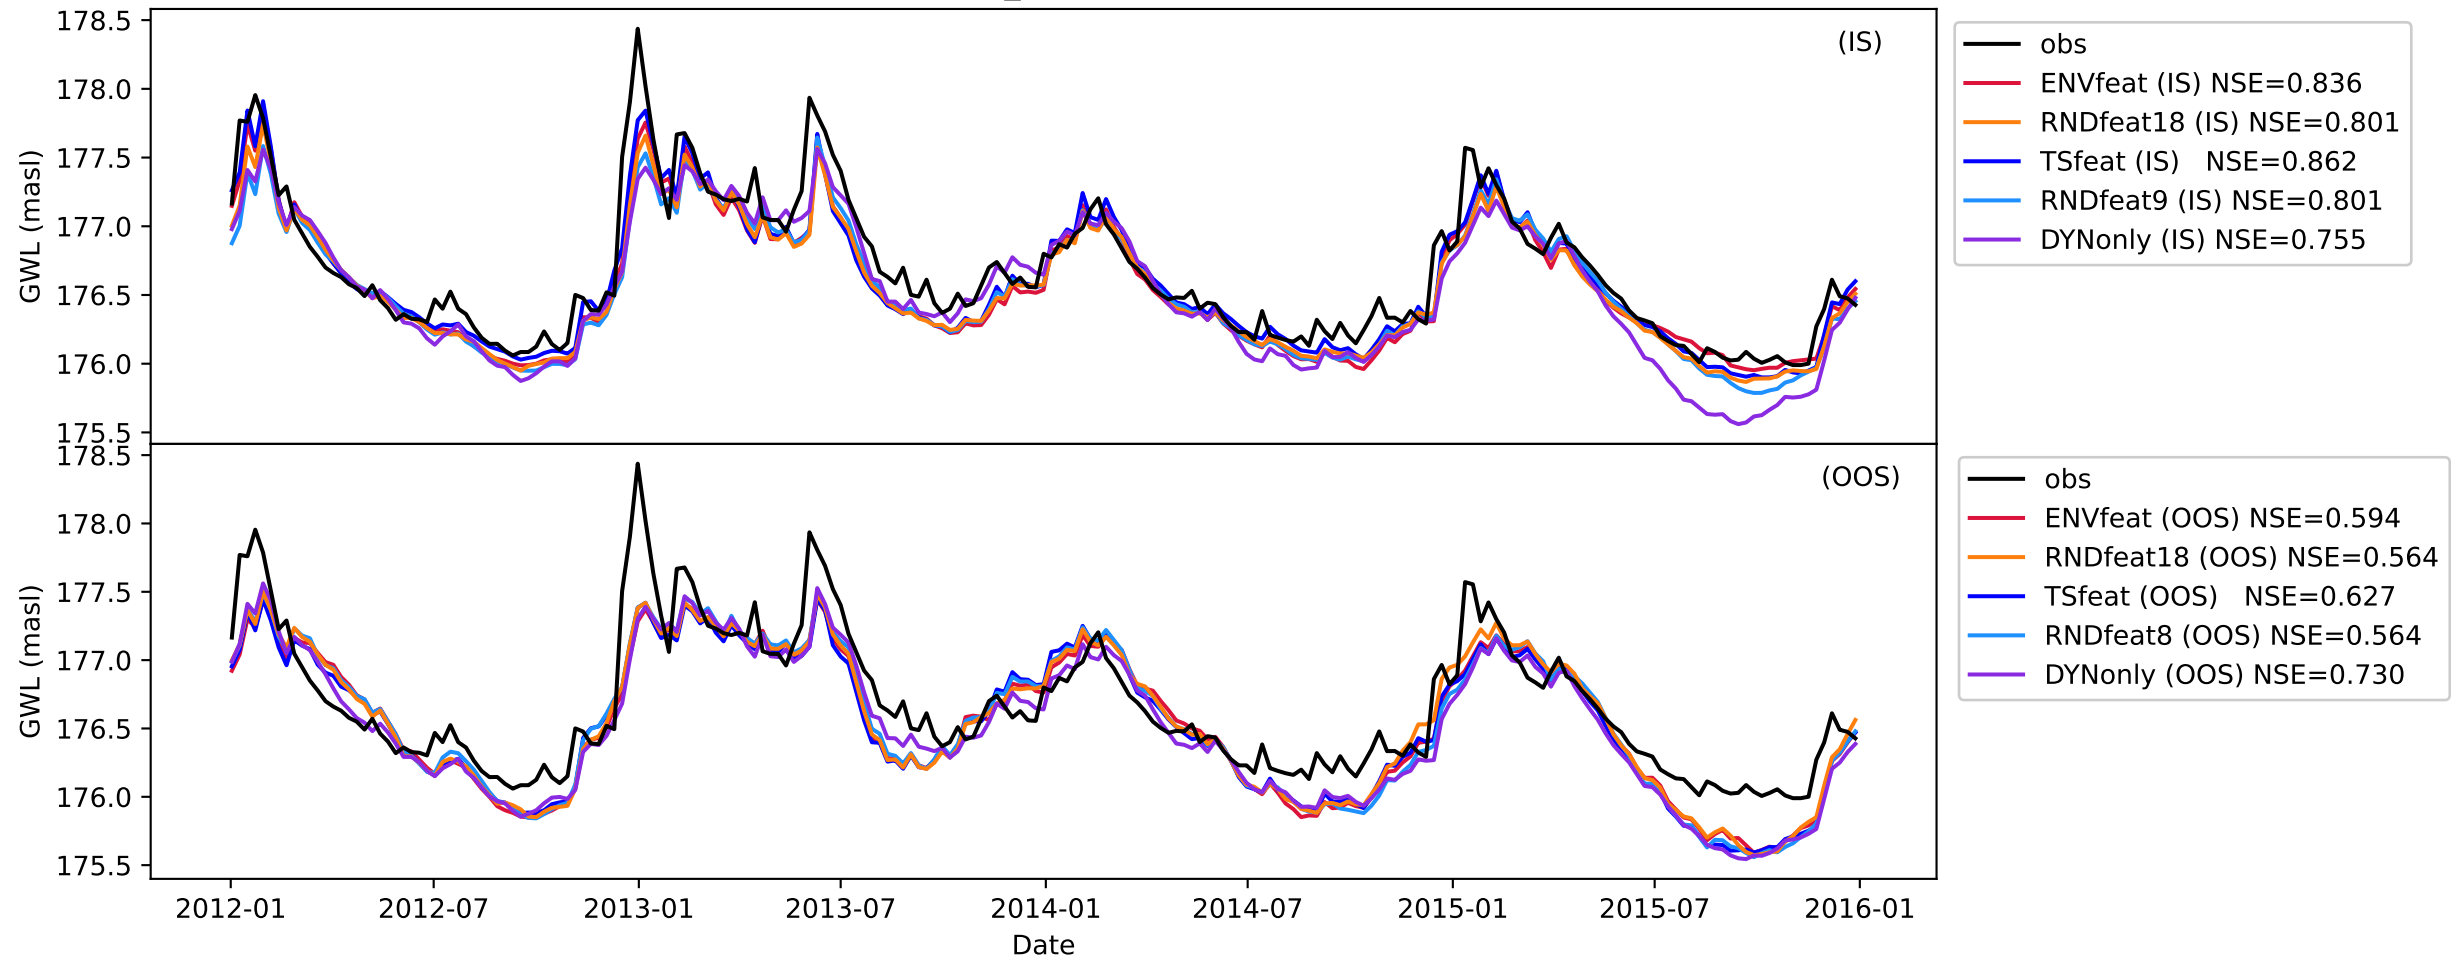

BY\_24153

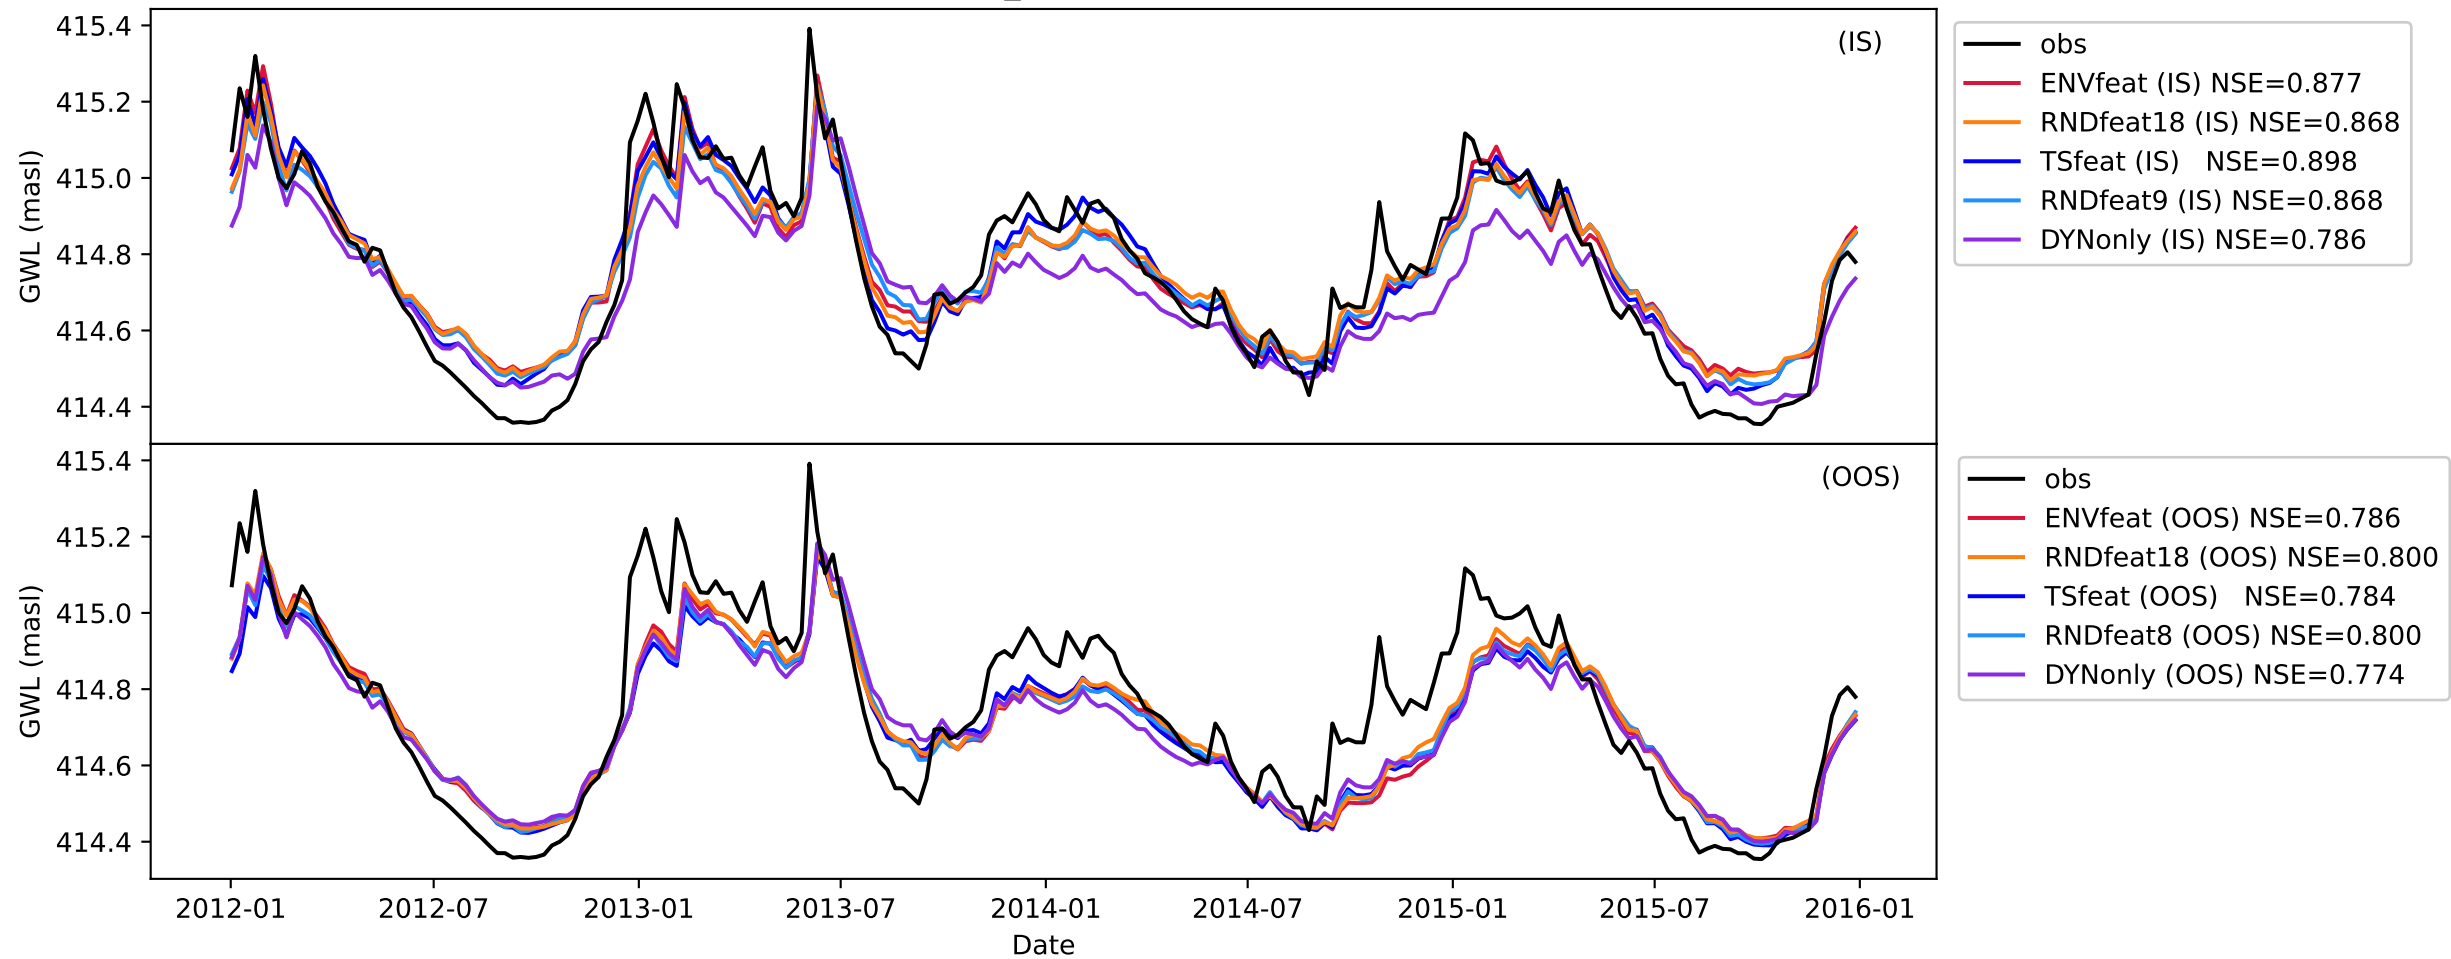



BY\_25155

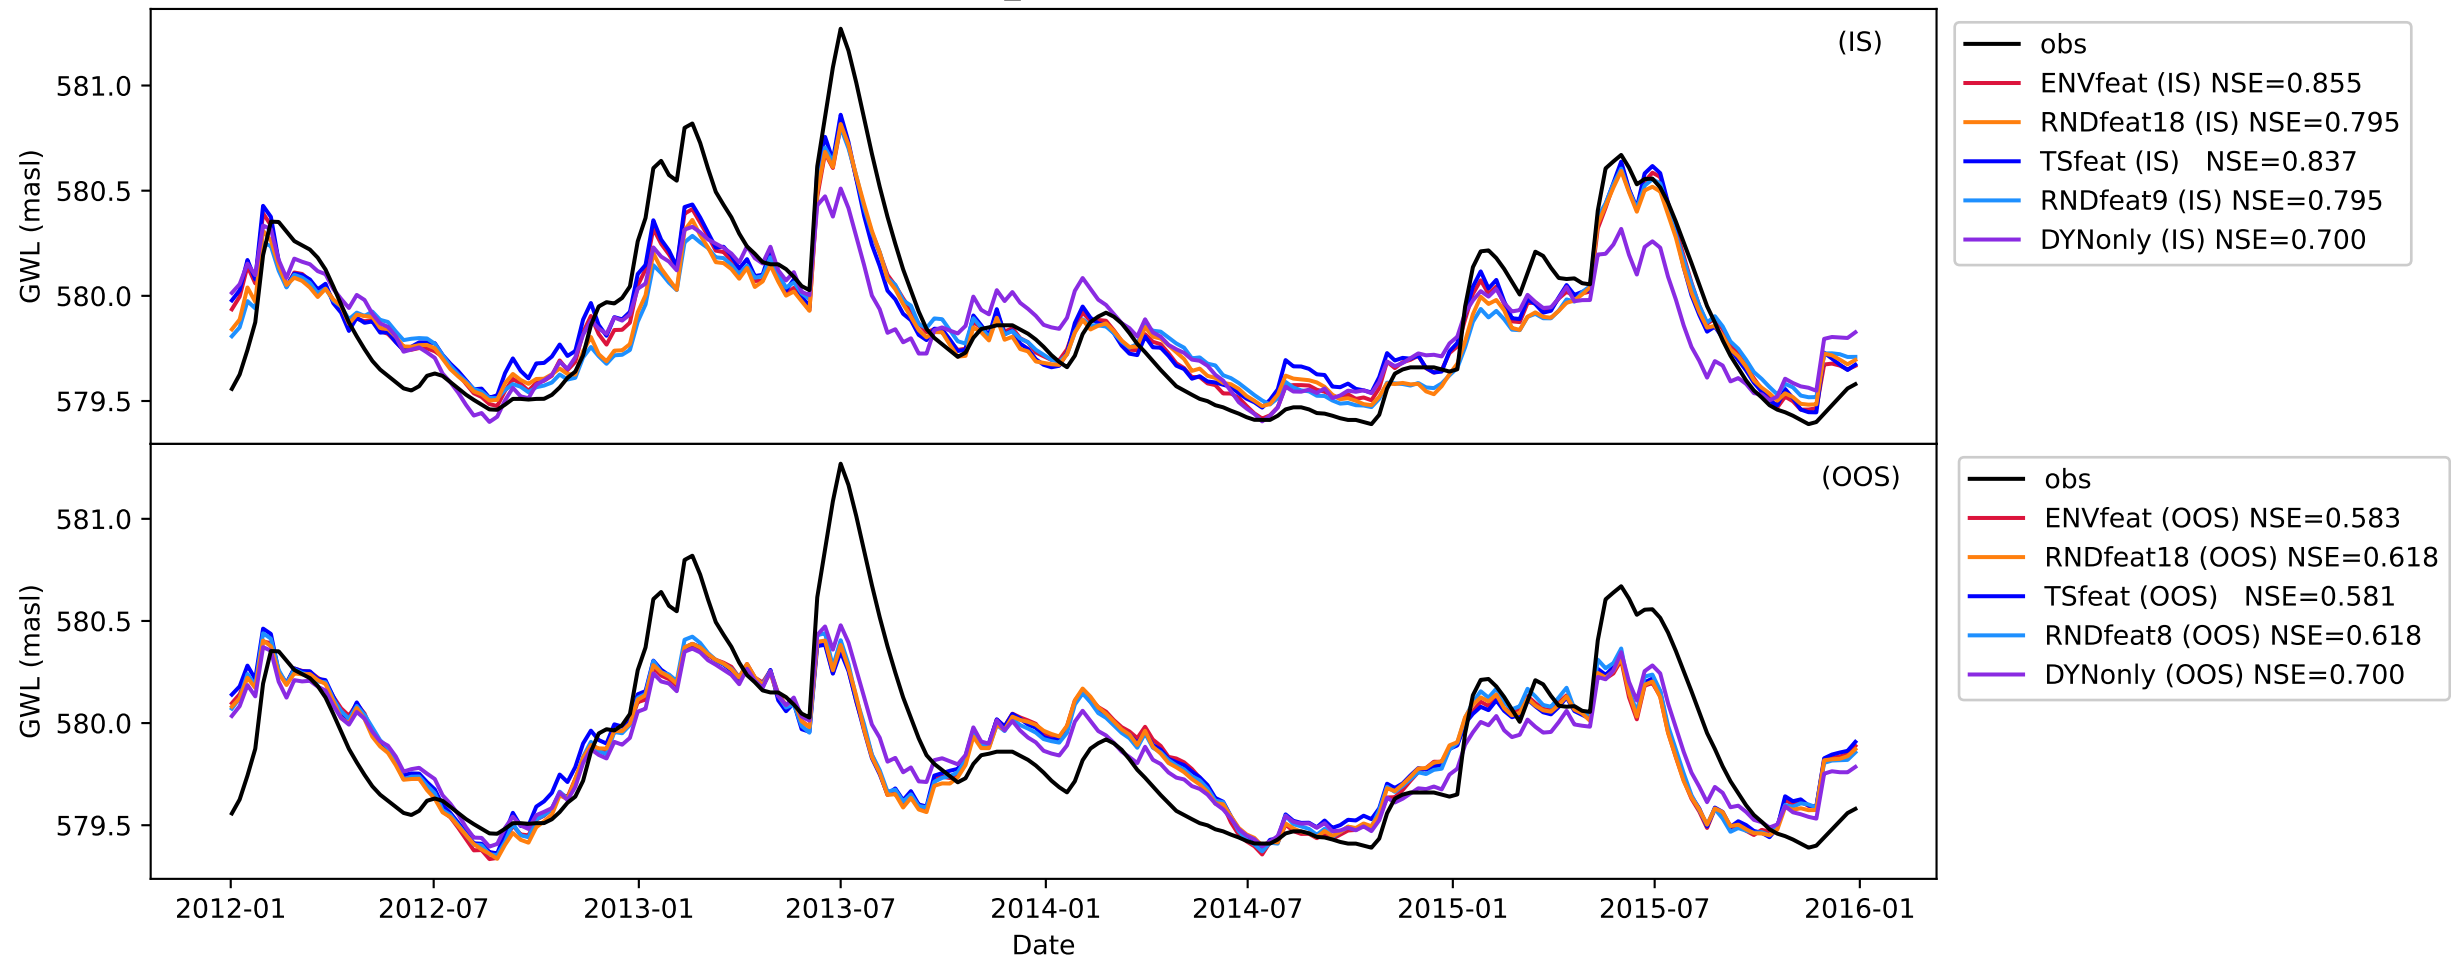

BY\_83614

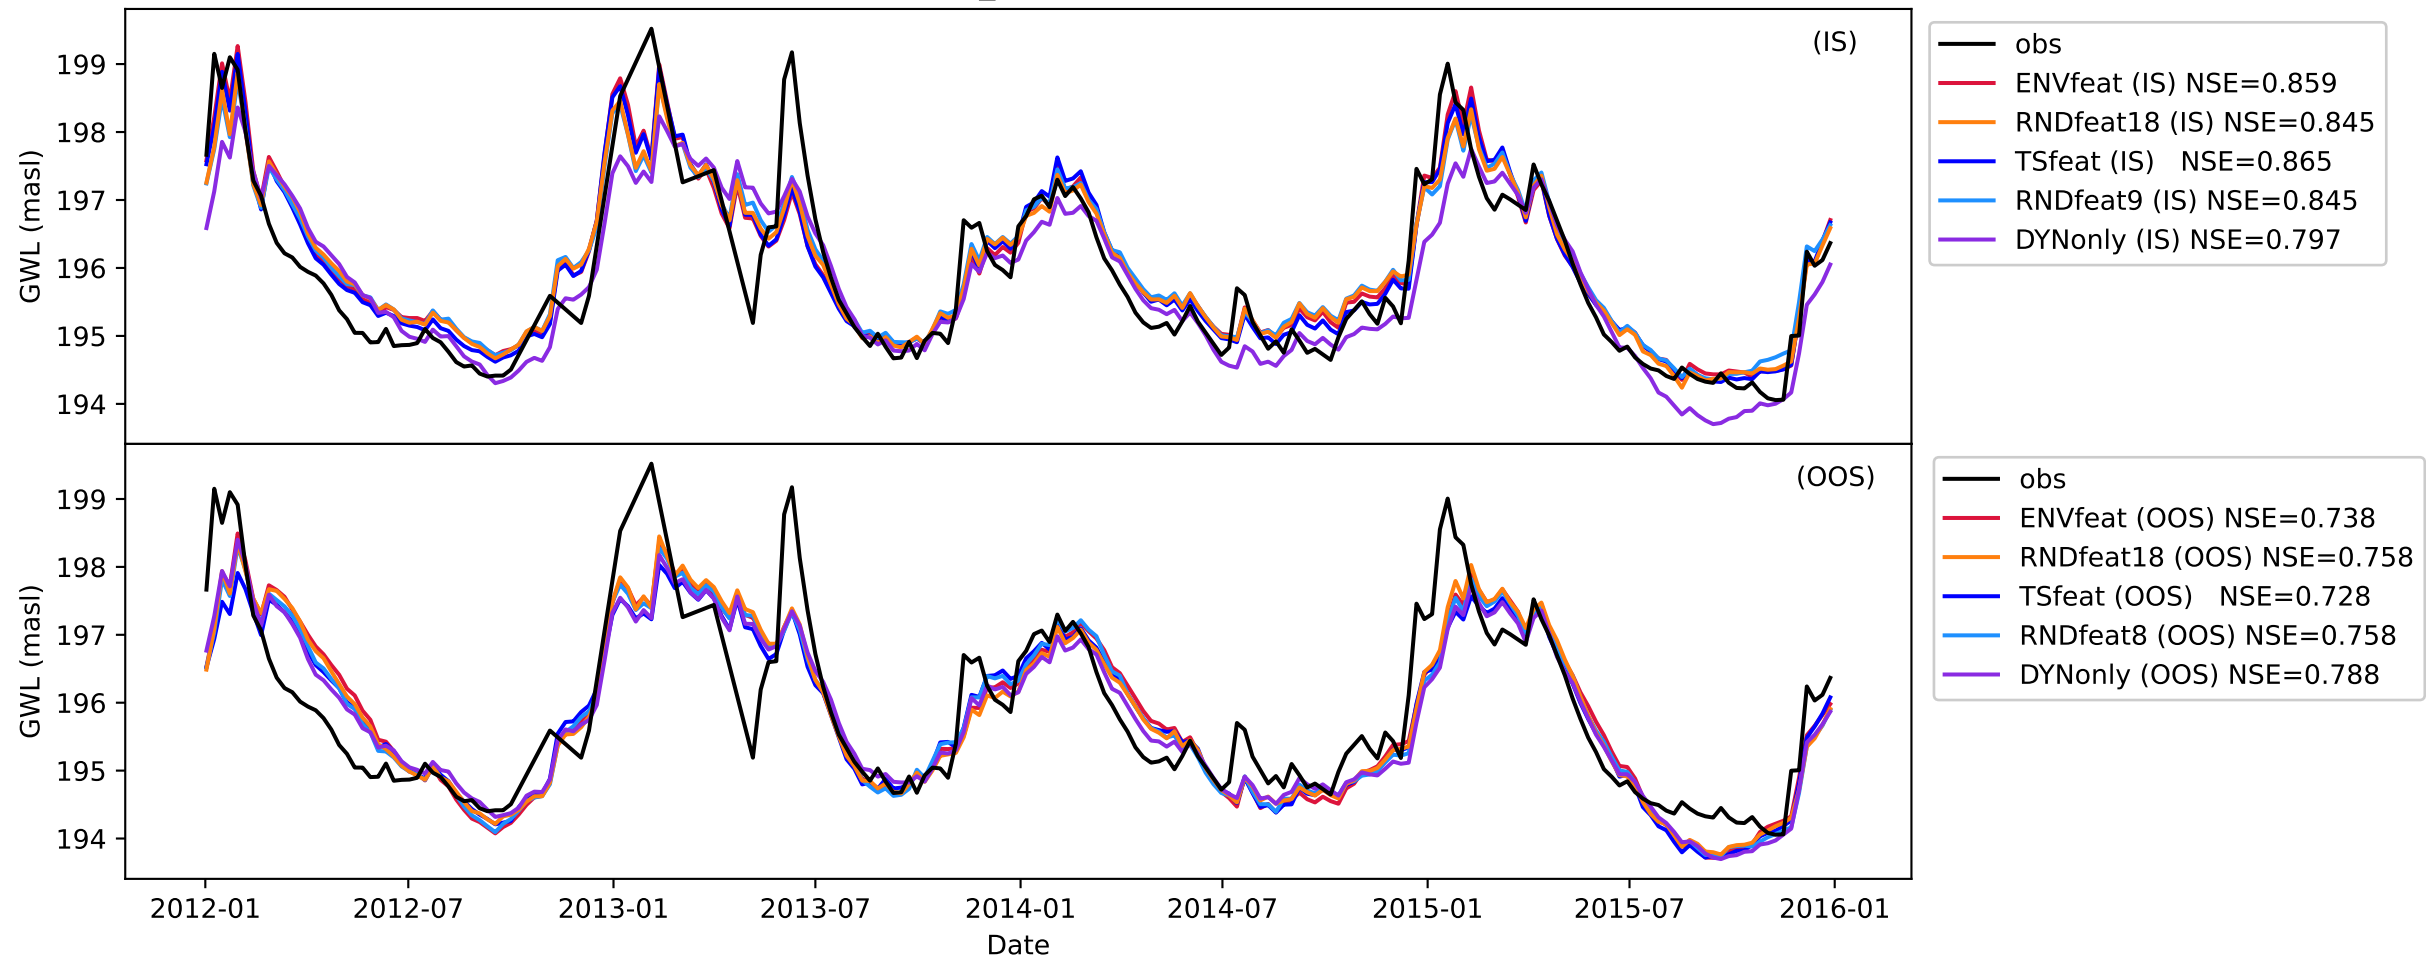

## HE\_6253

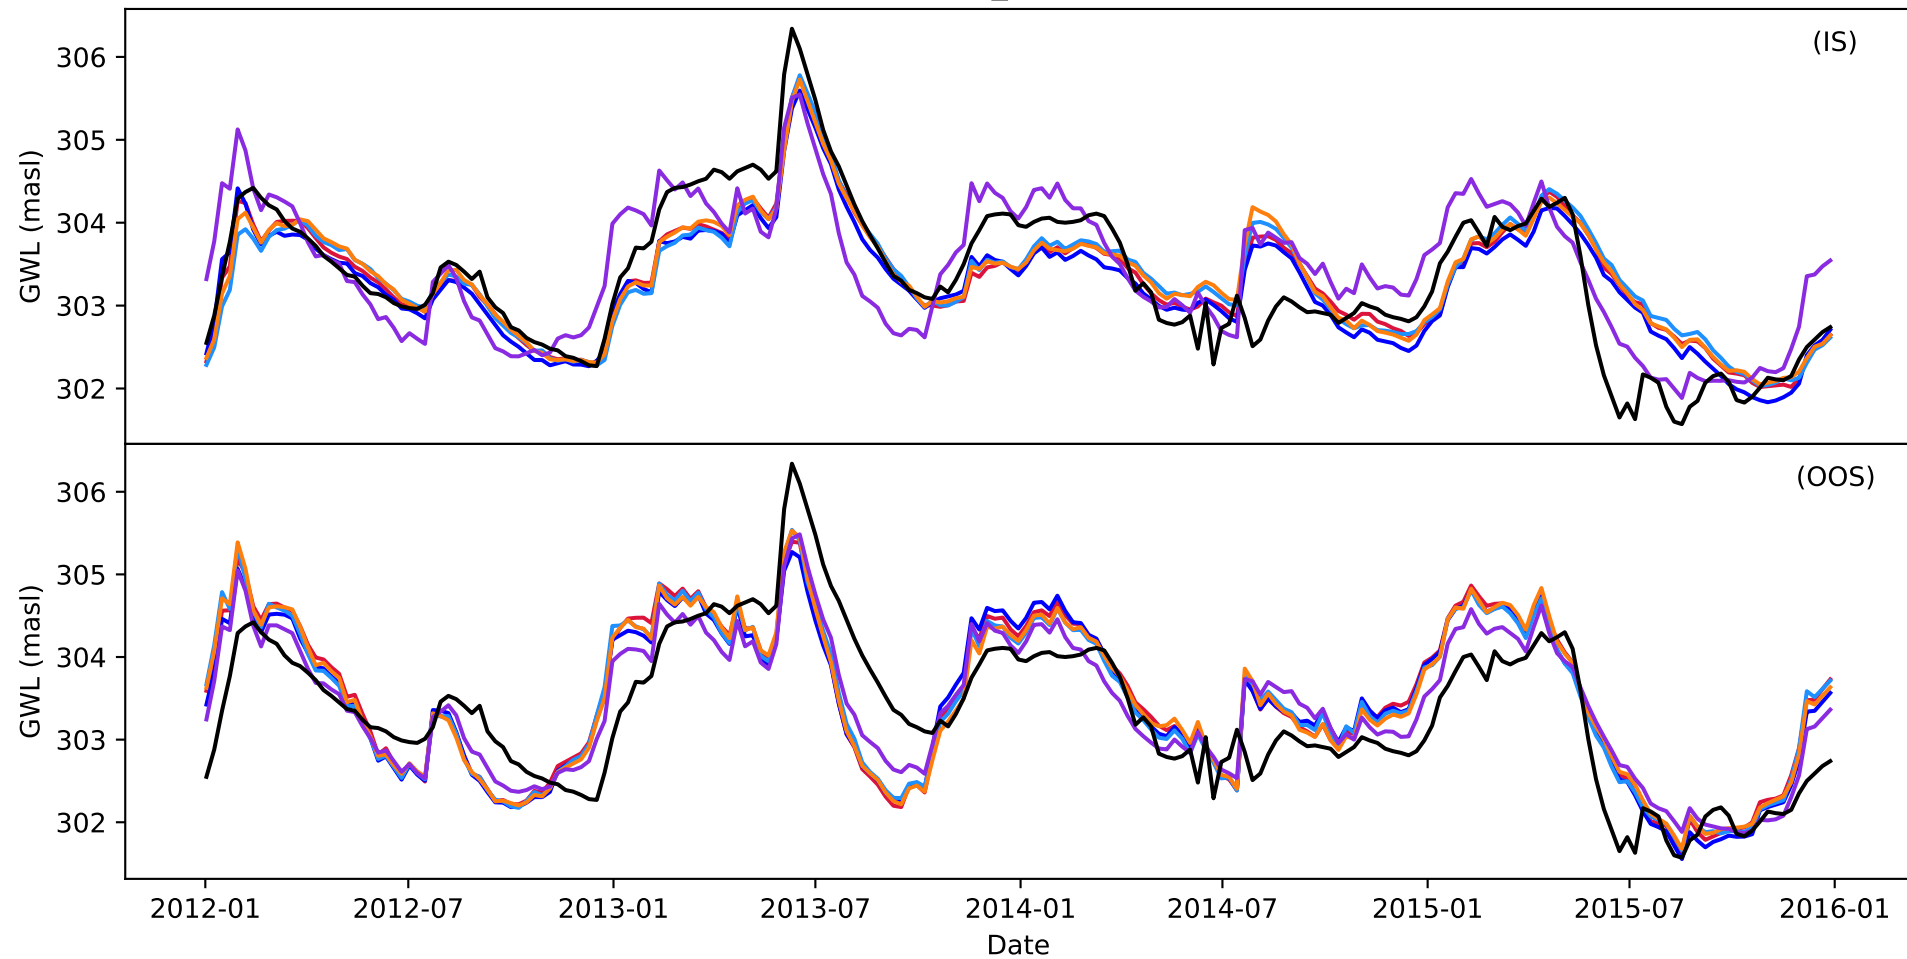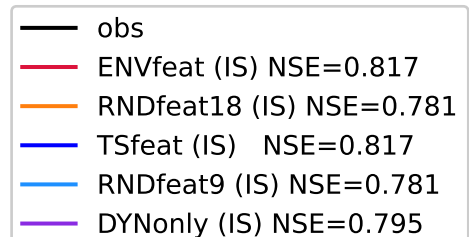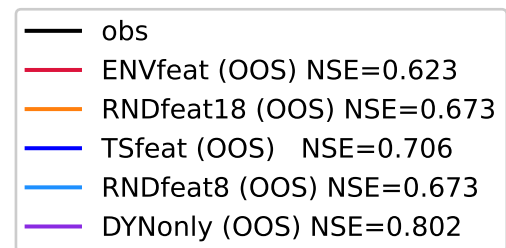

HE\_7824

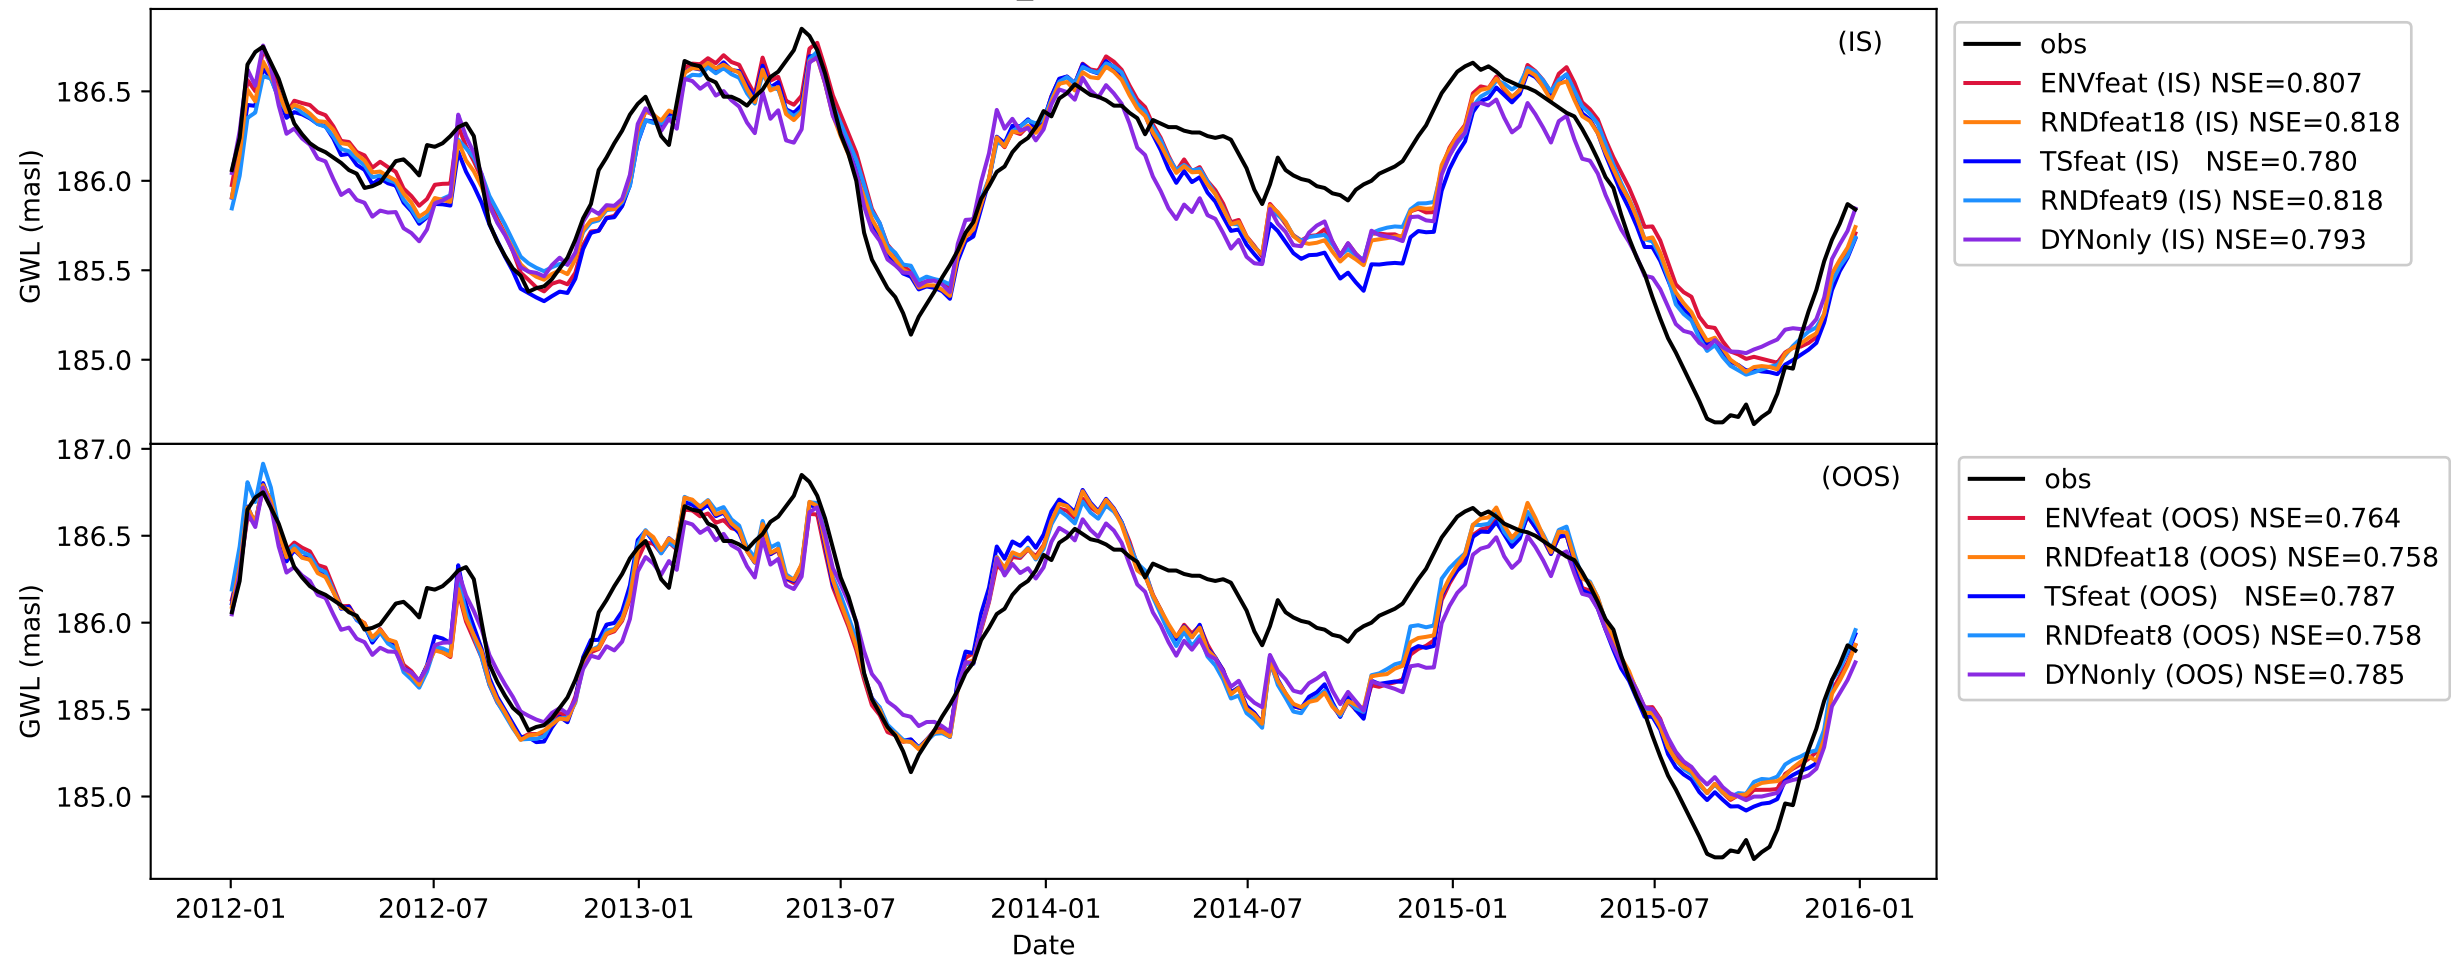

## HE\_10319

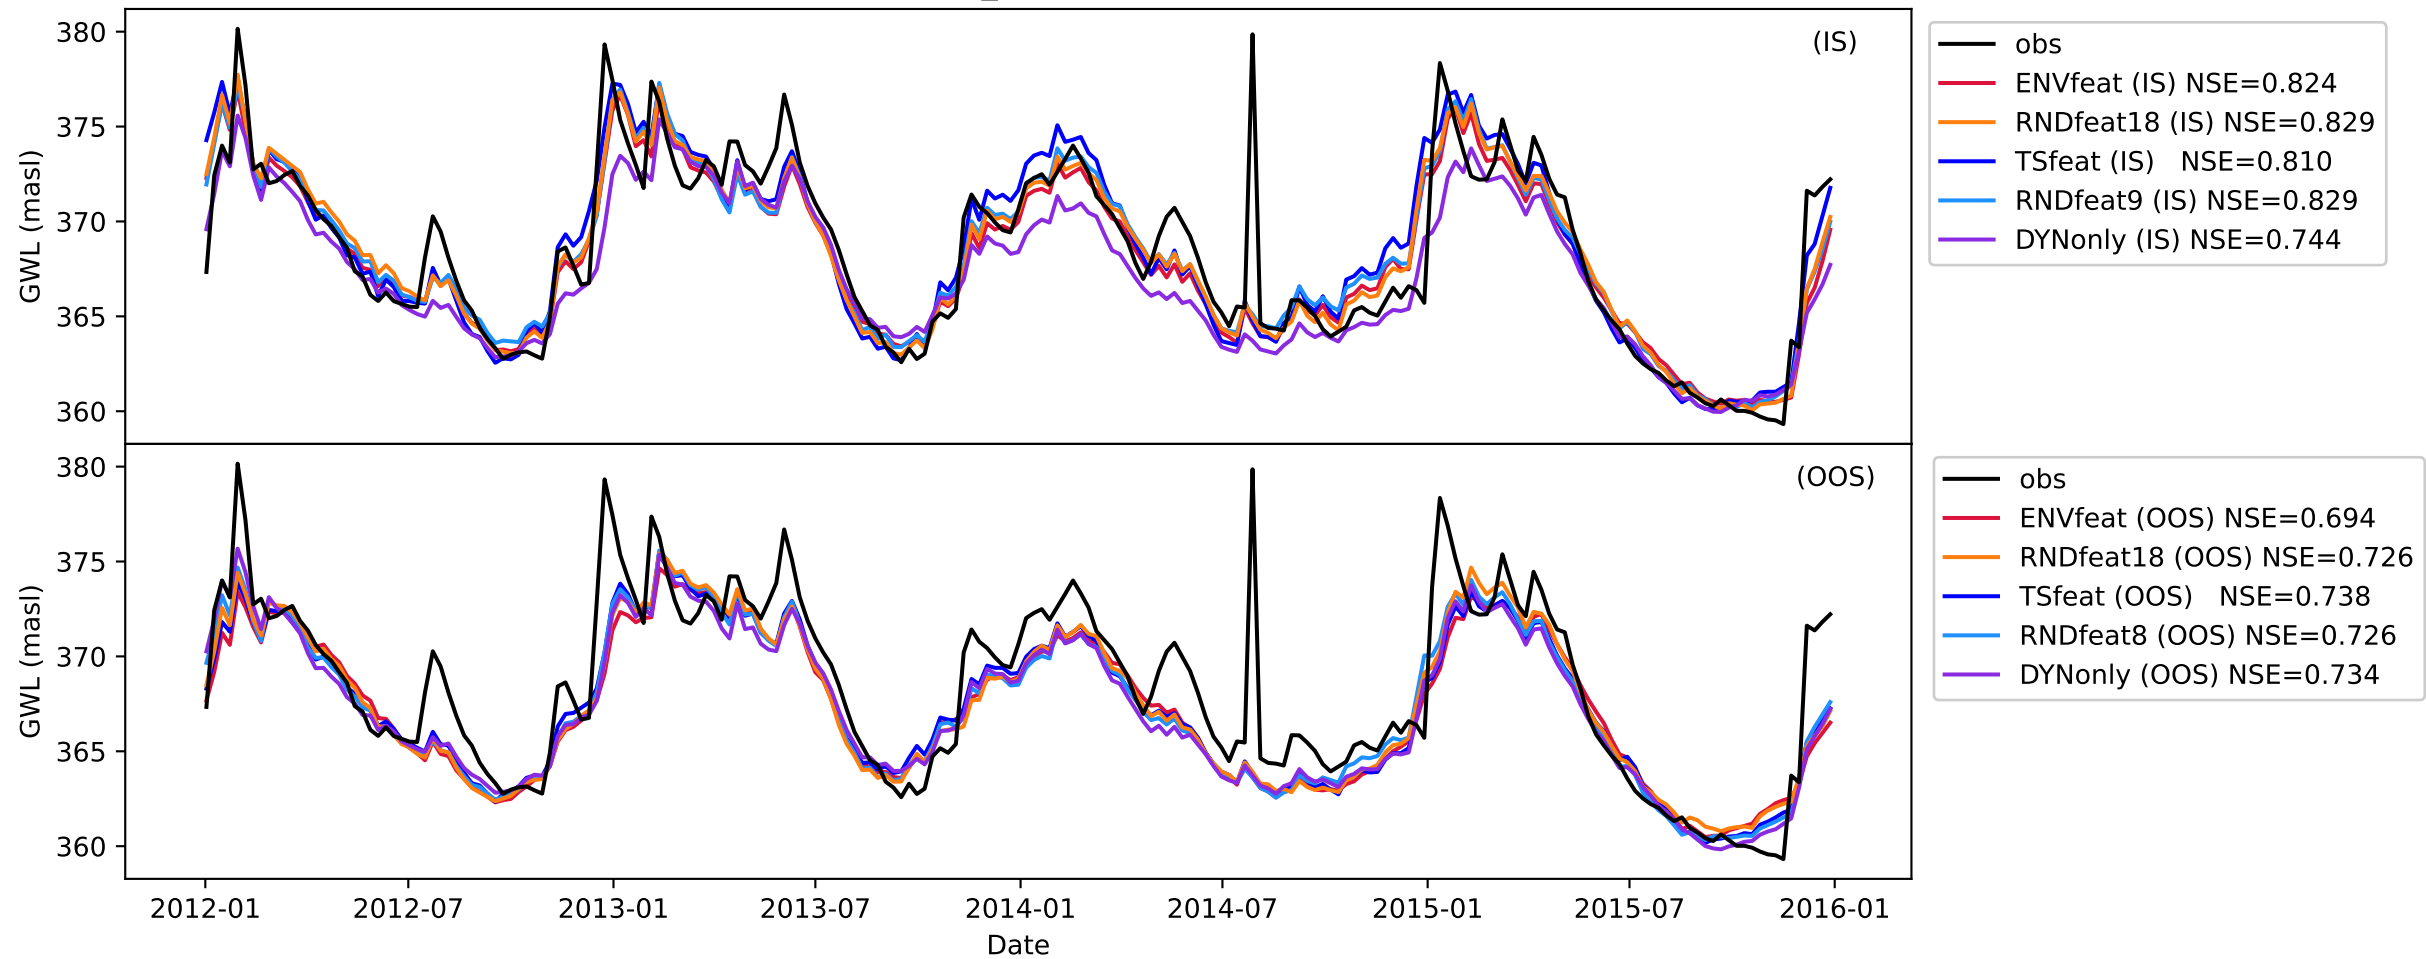

## HE\_11781

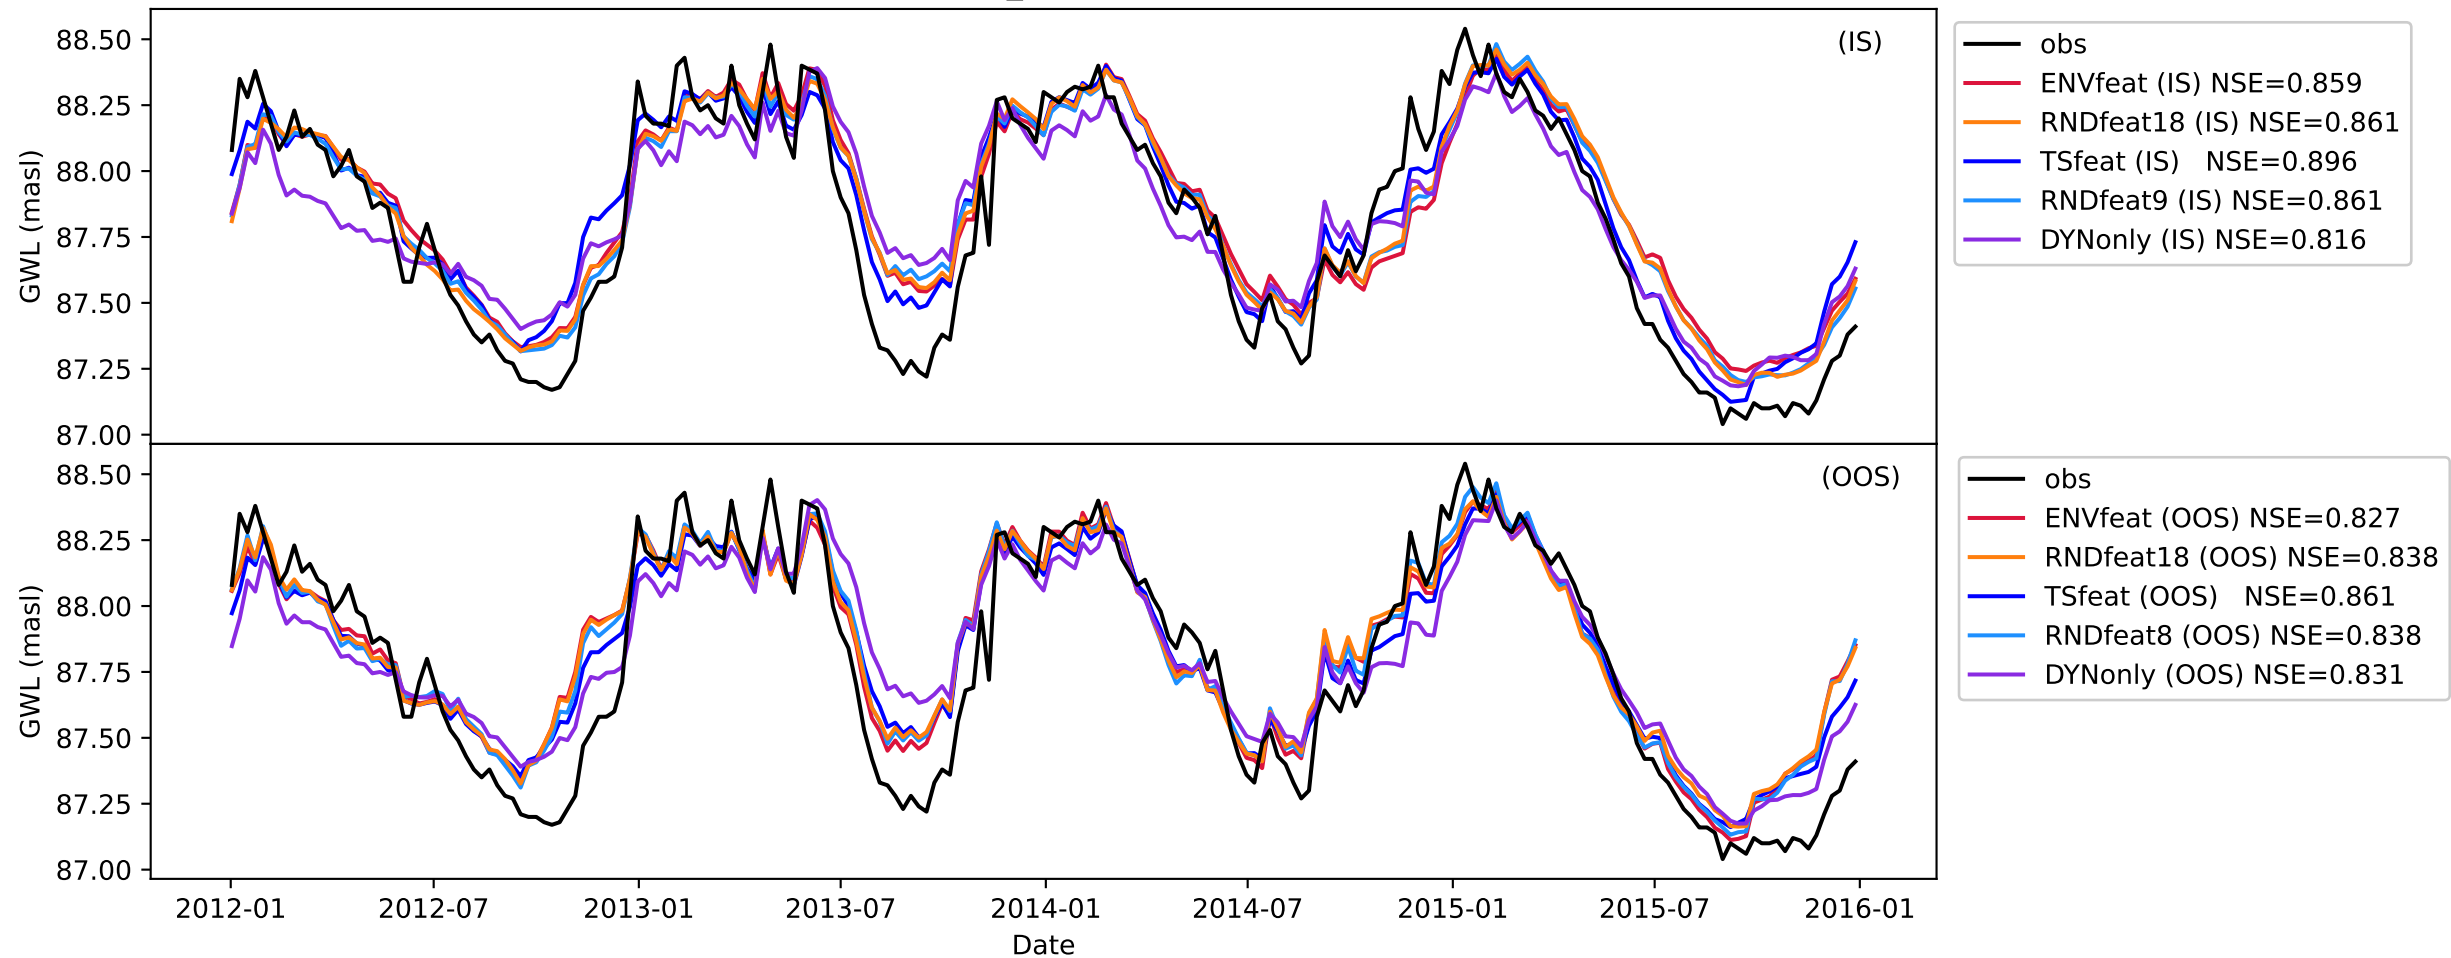

## HE\_12117

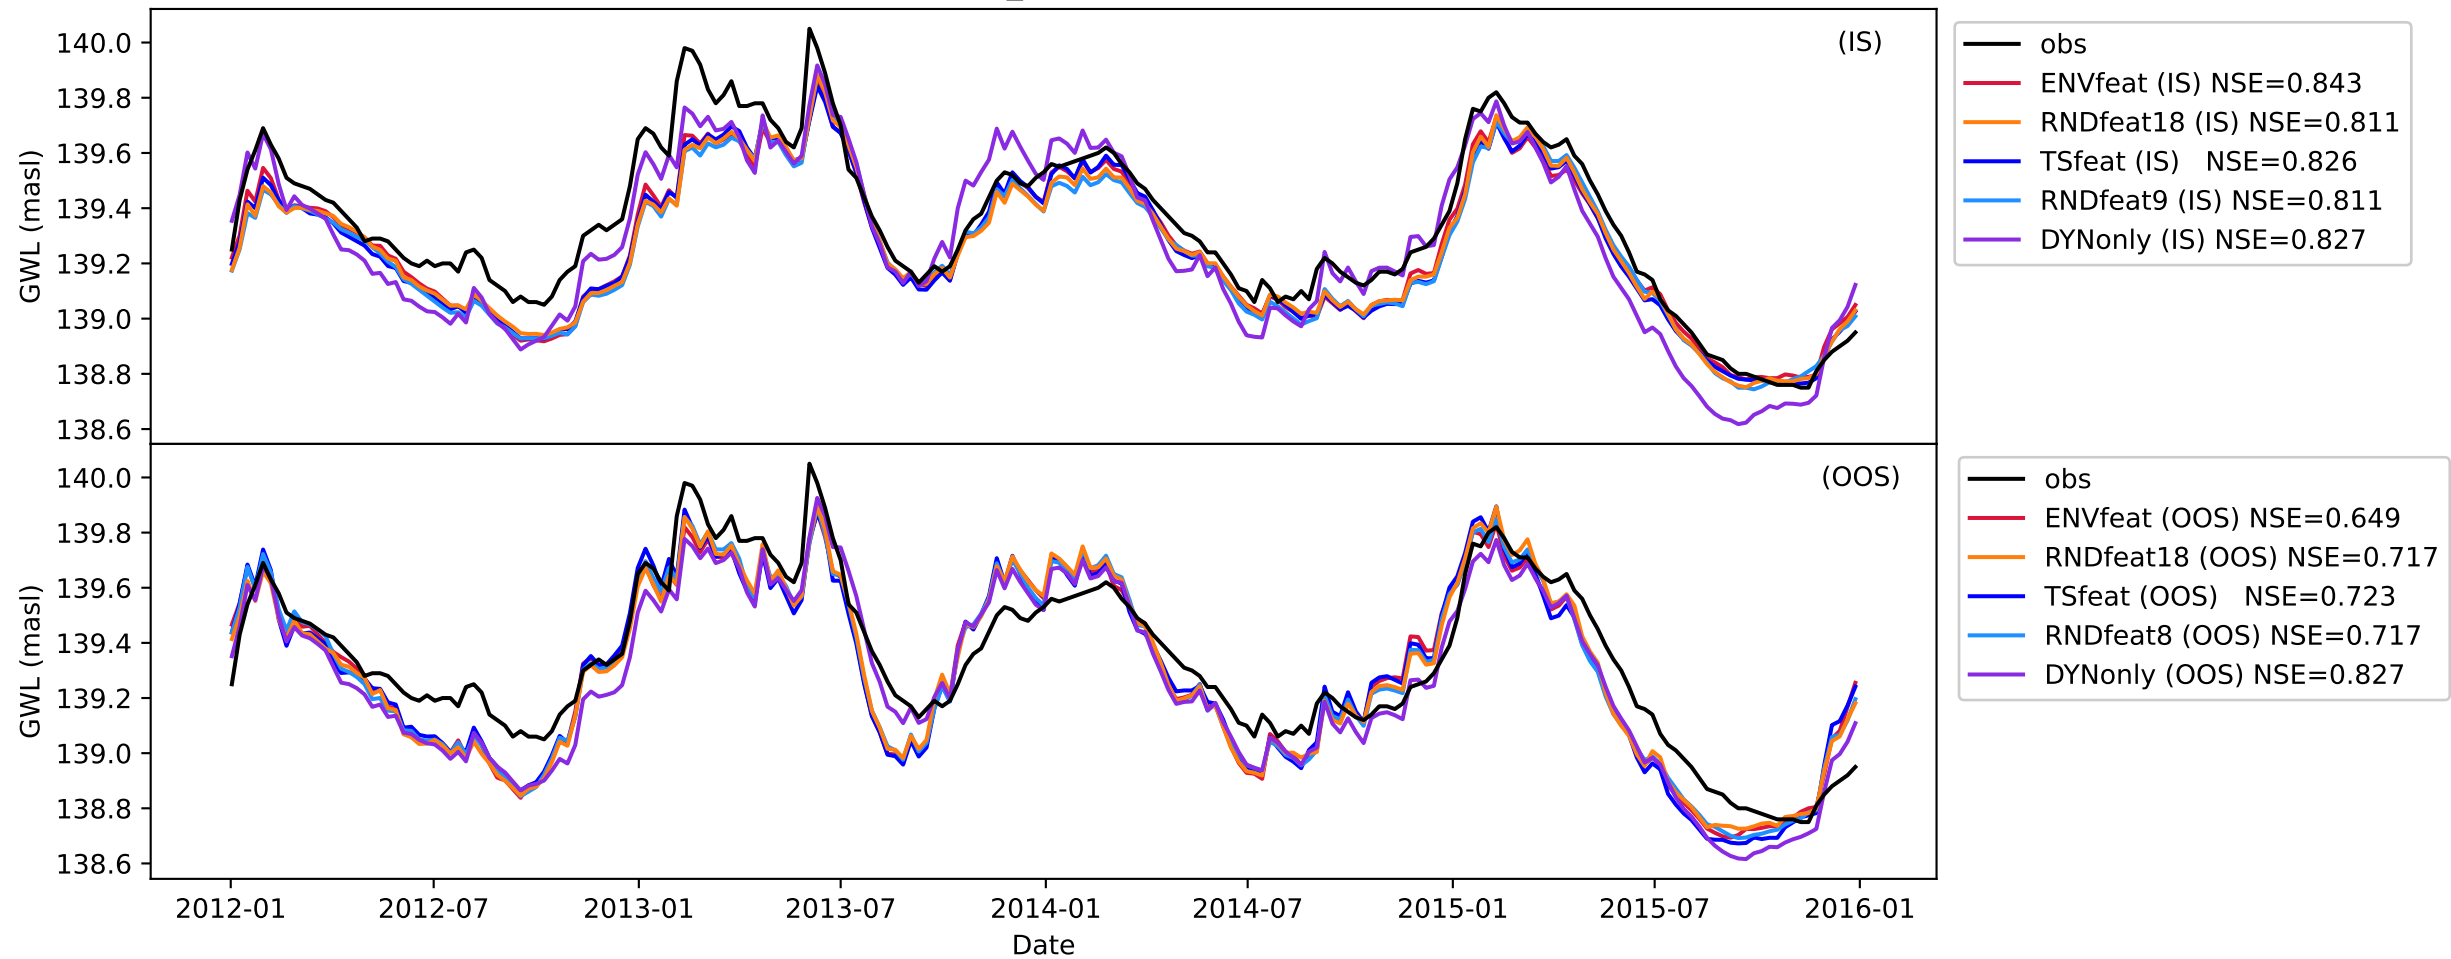

## HE\_14293

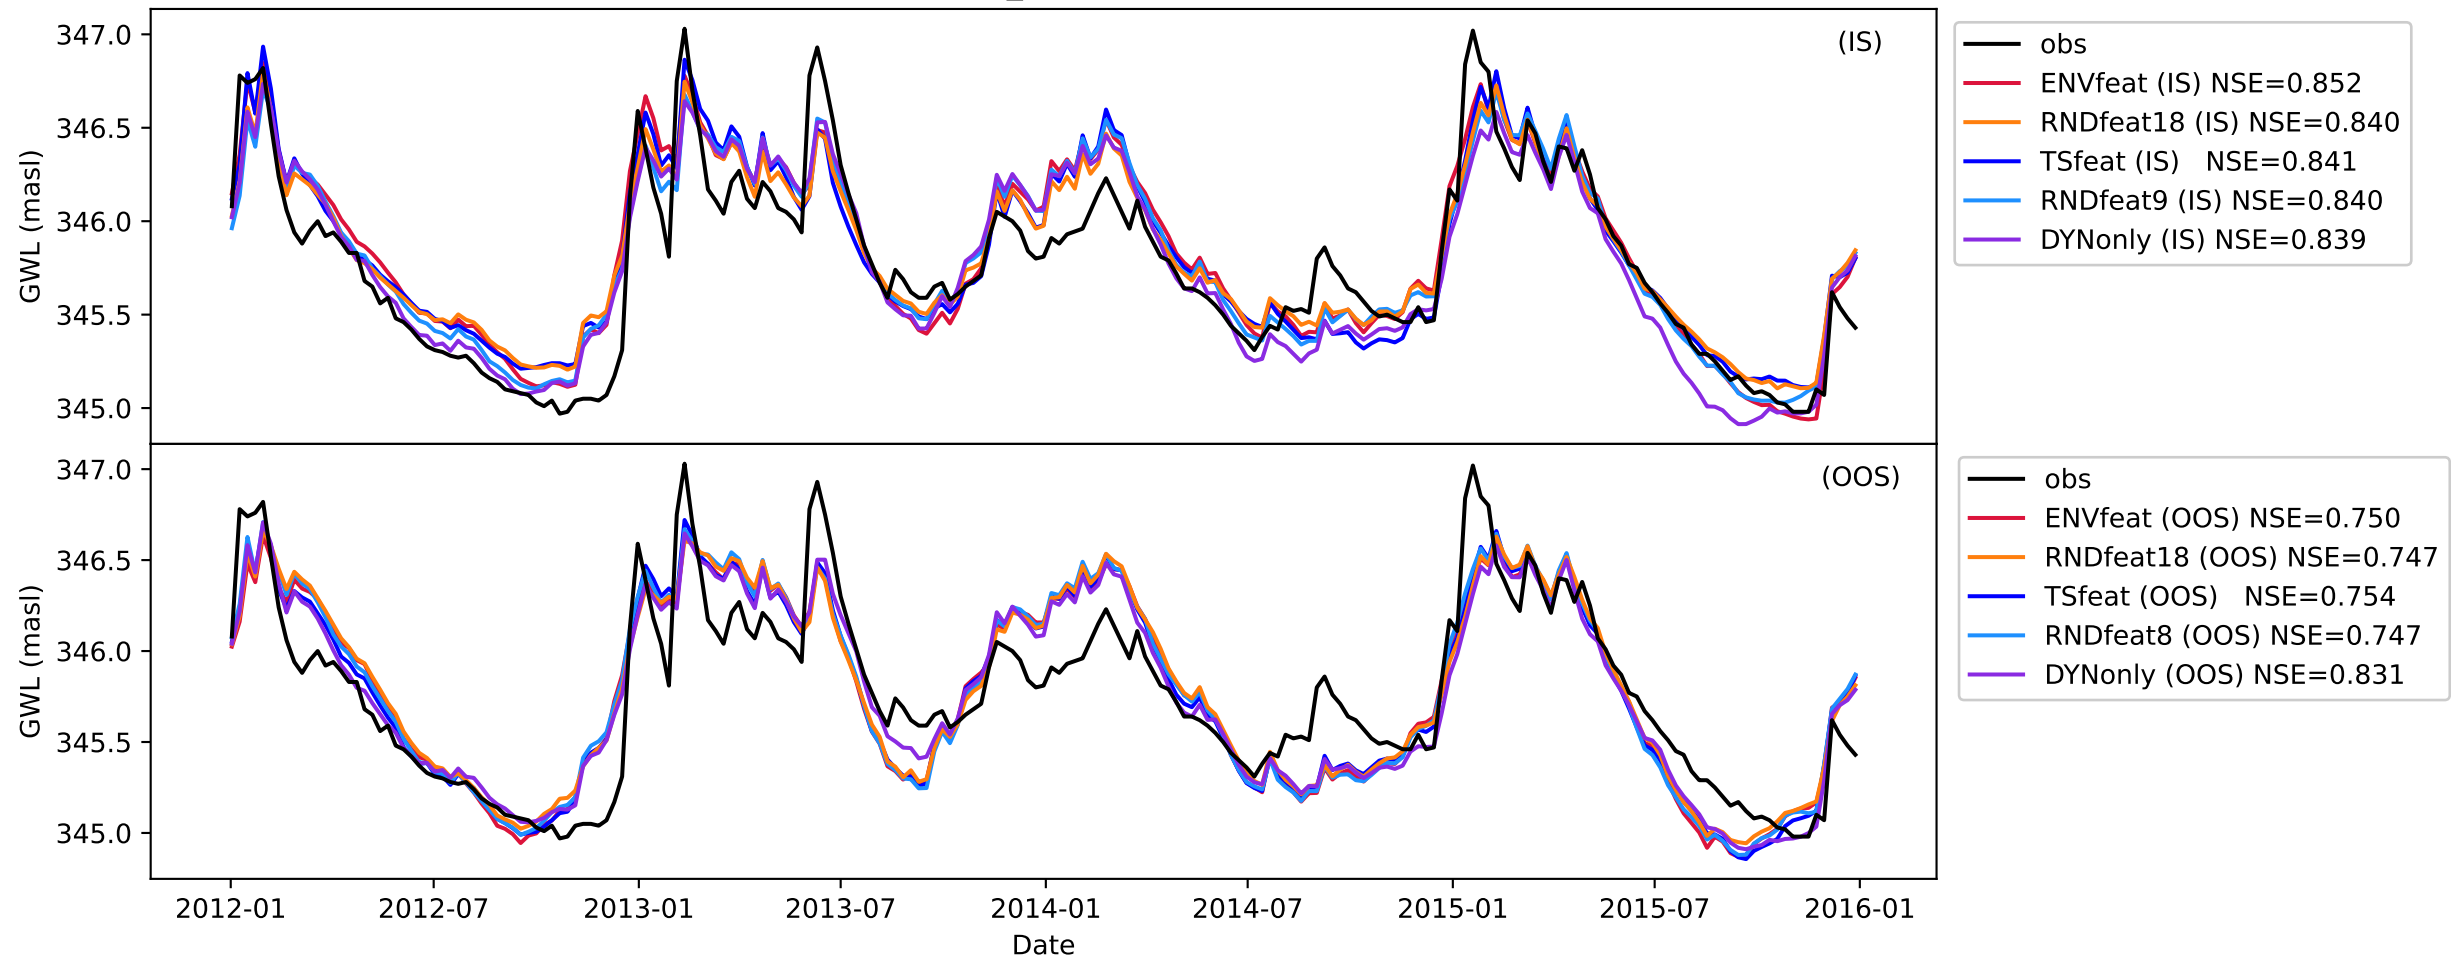



## HE\_14297

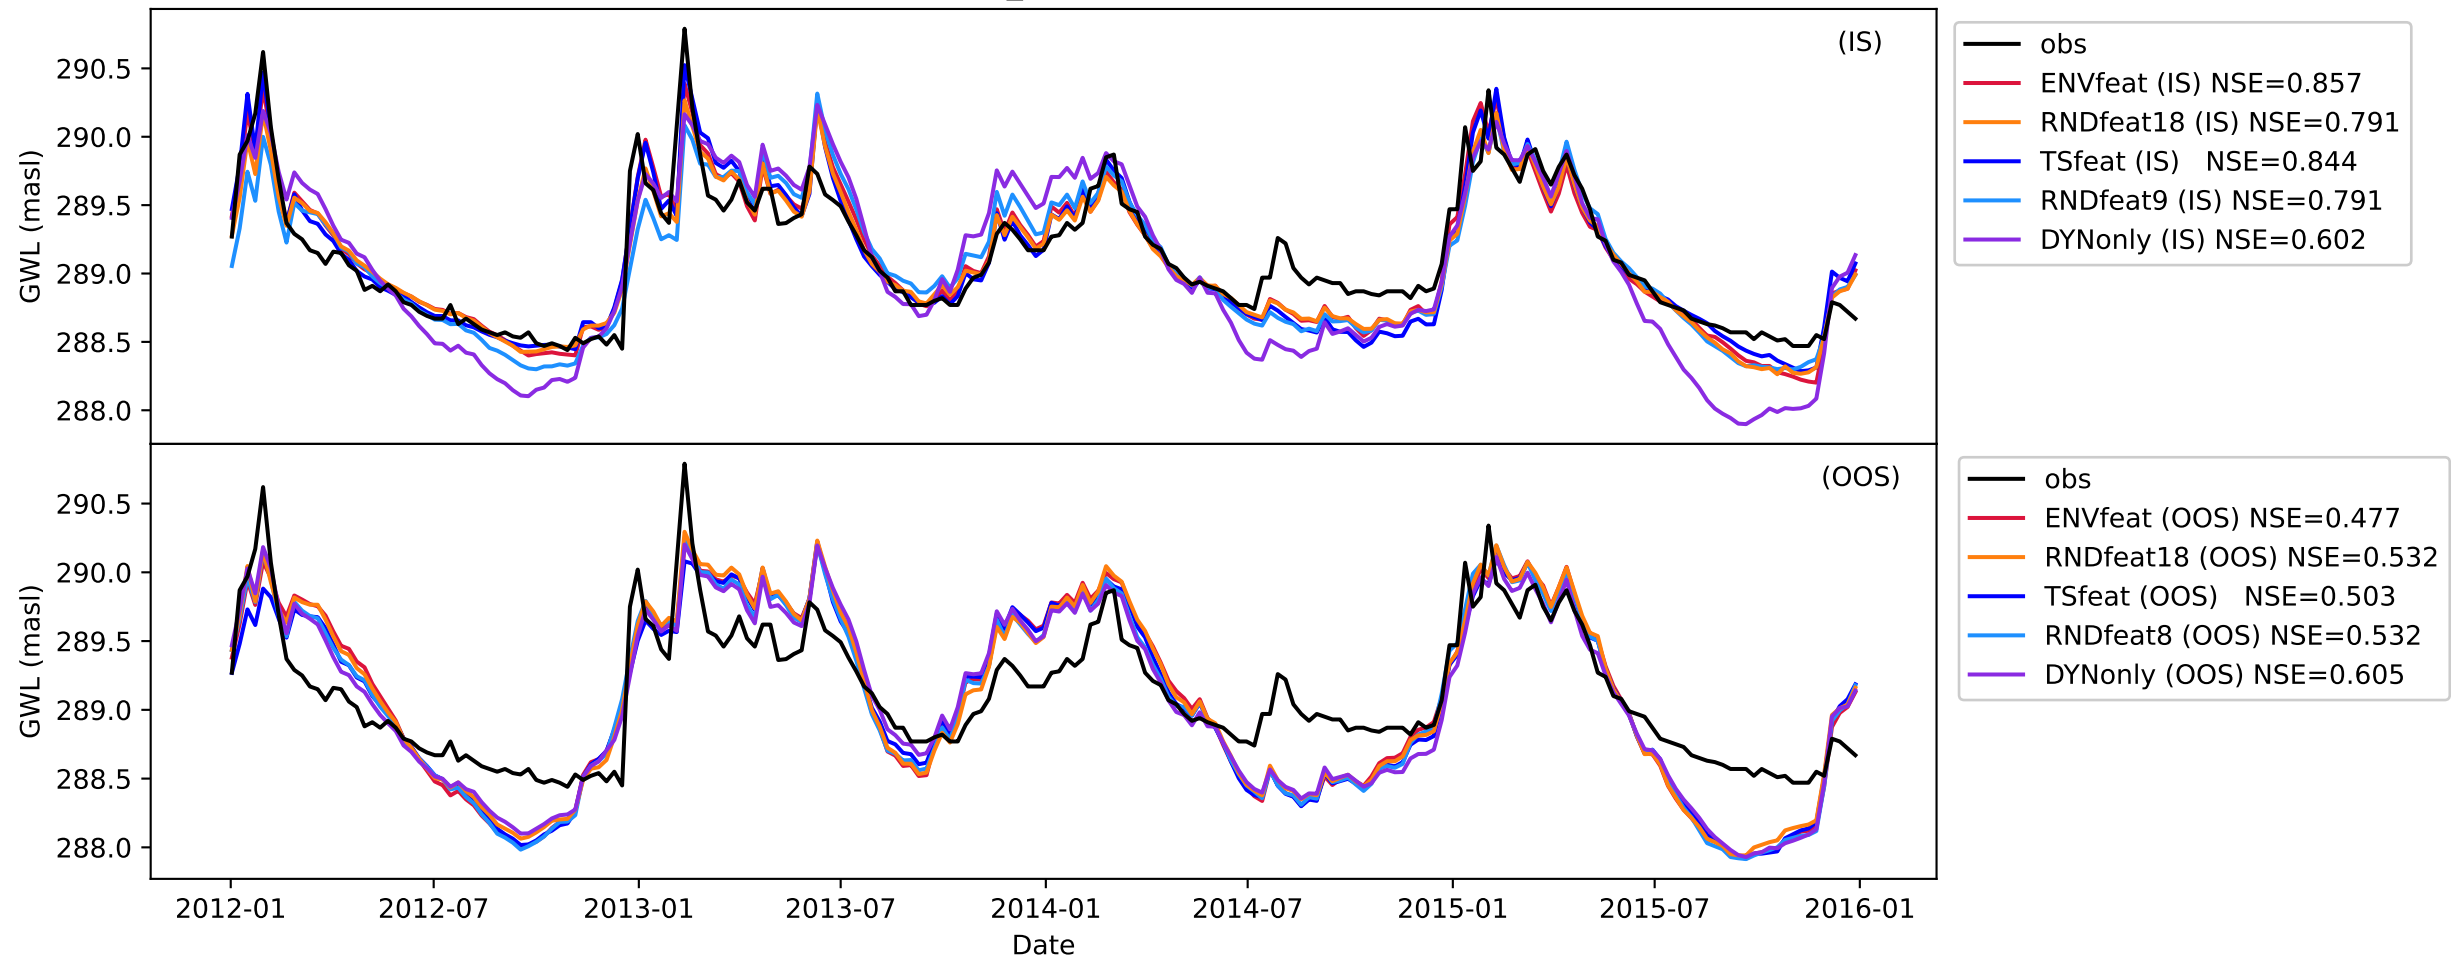

NI\_9700020

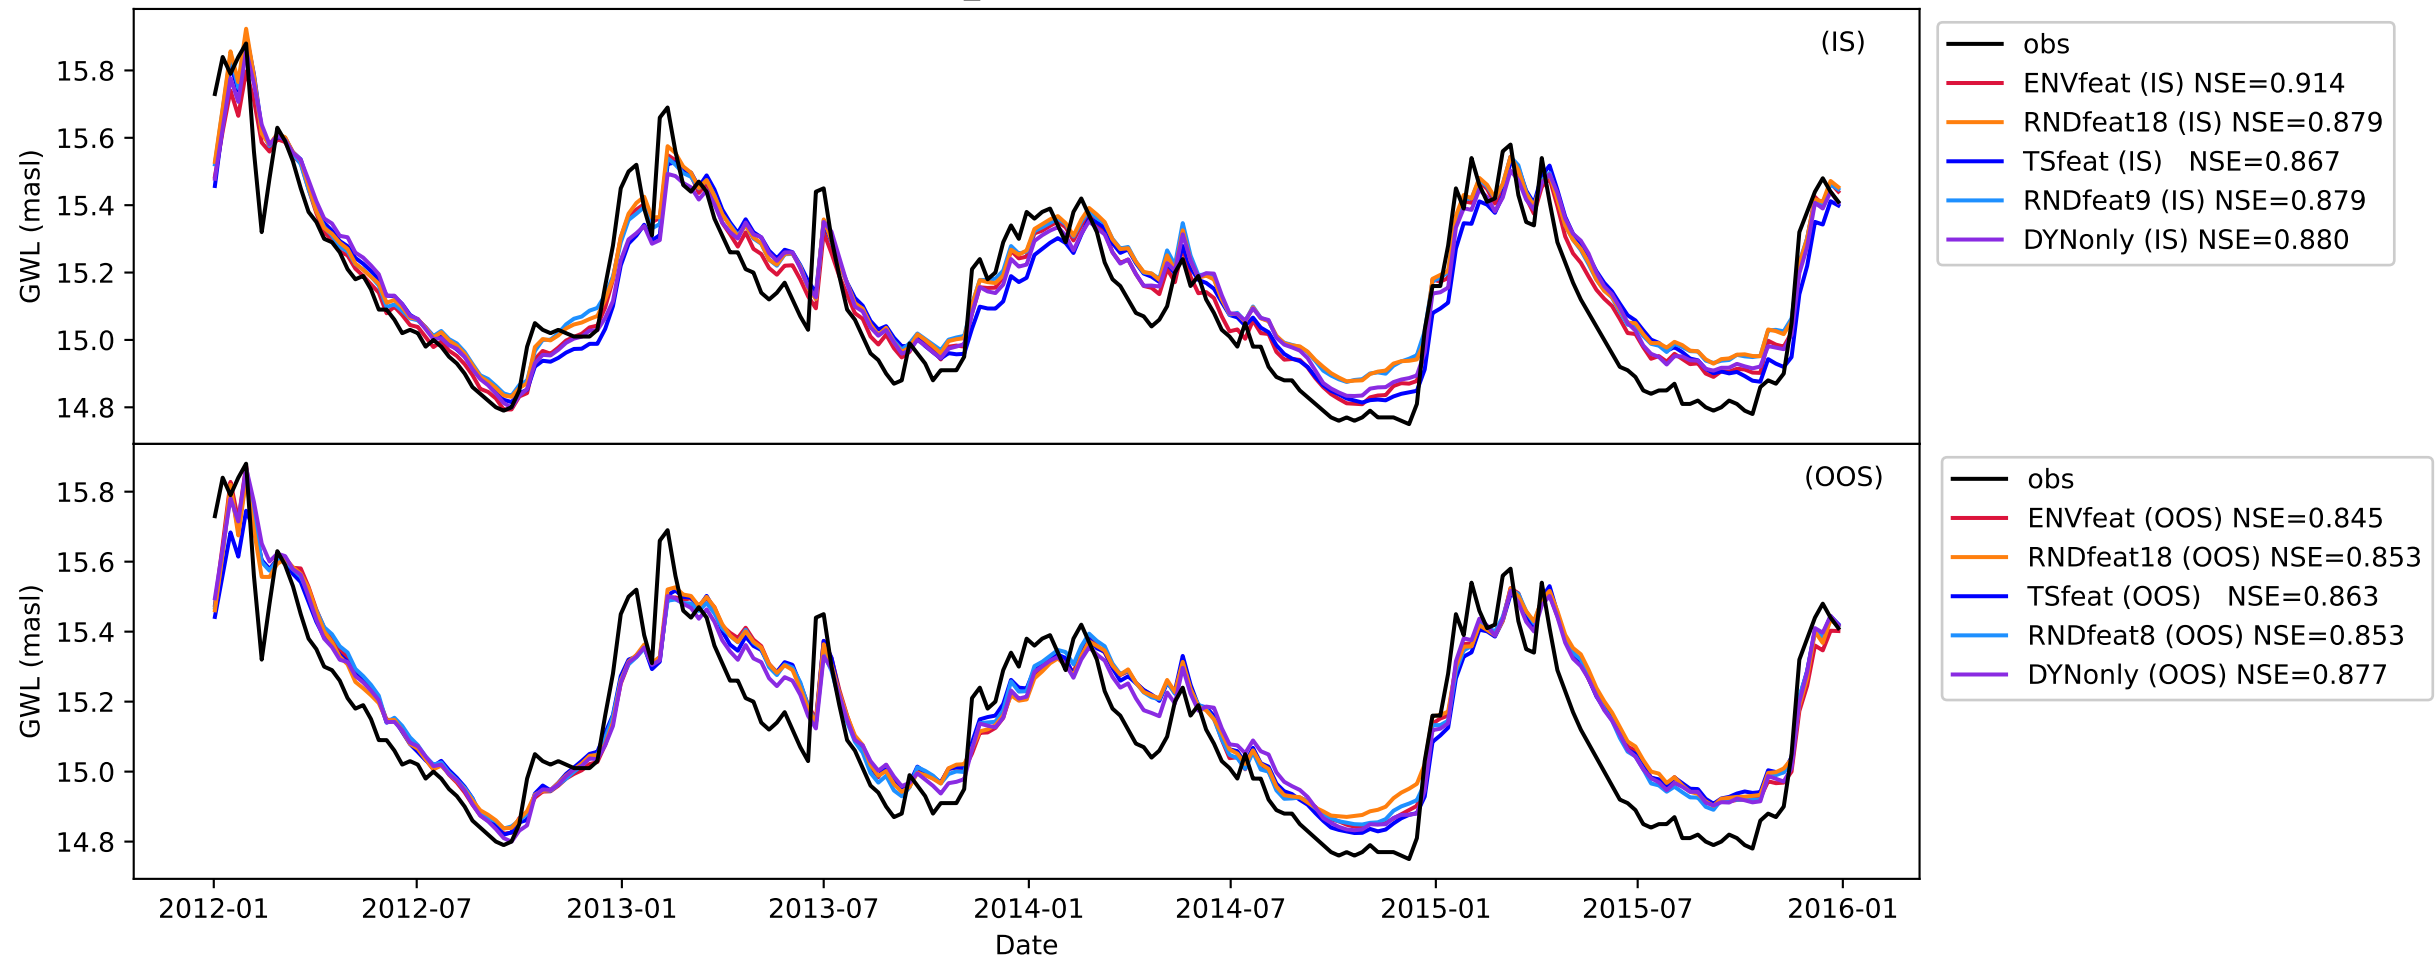

NI\_9700080

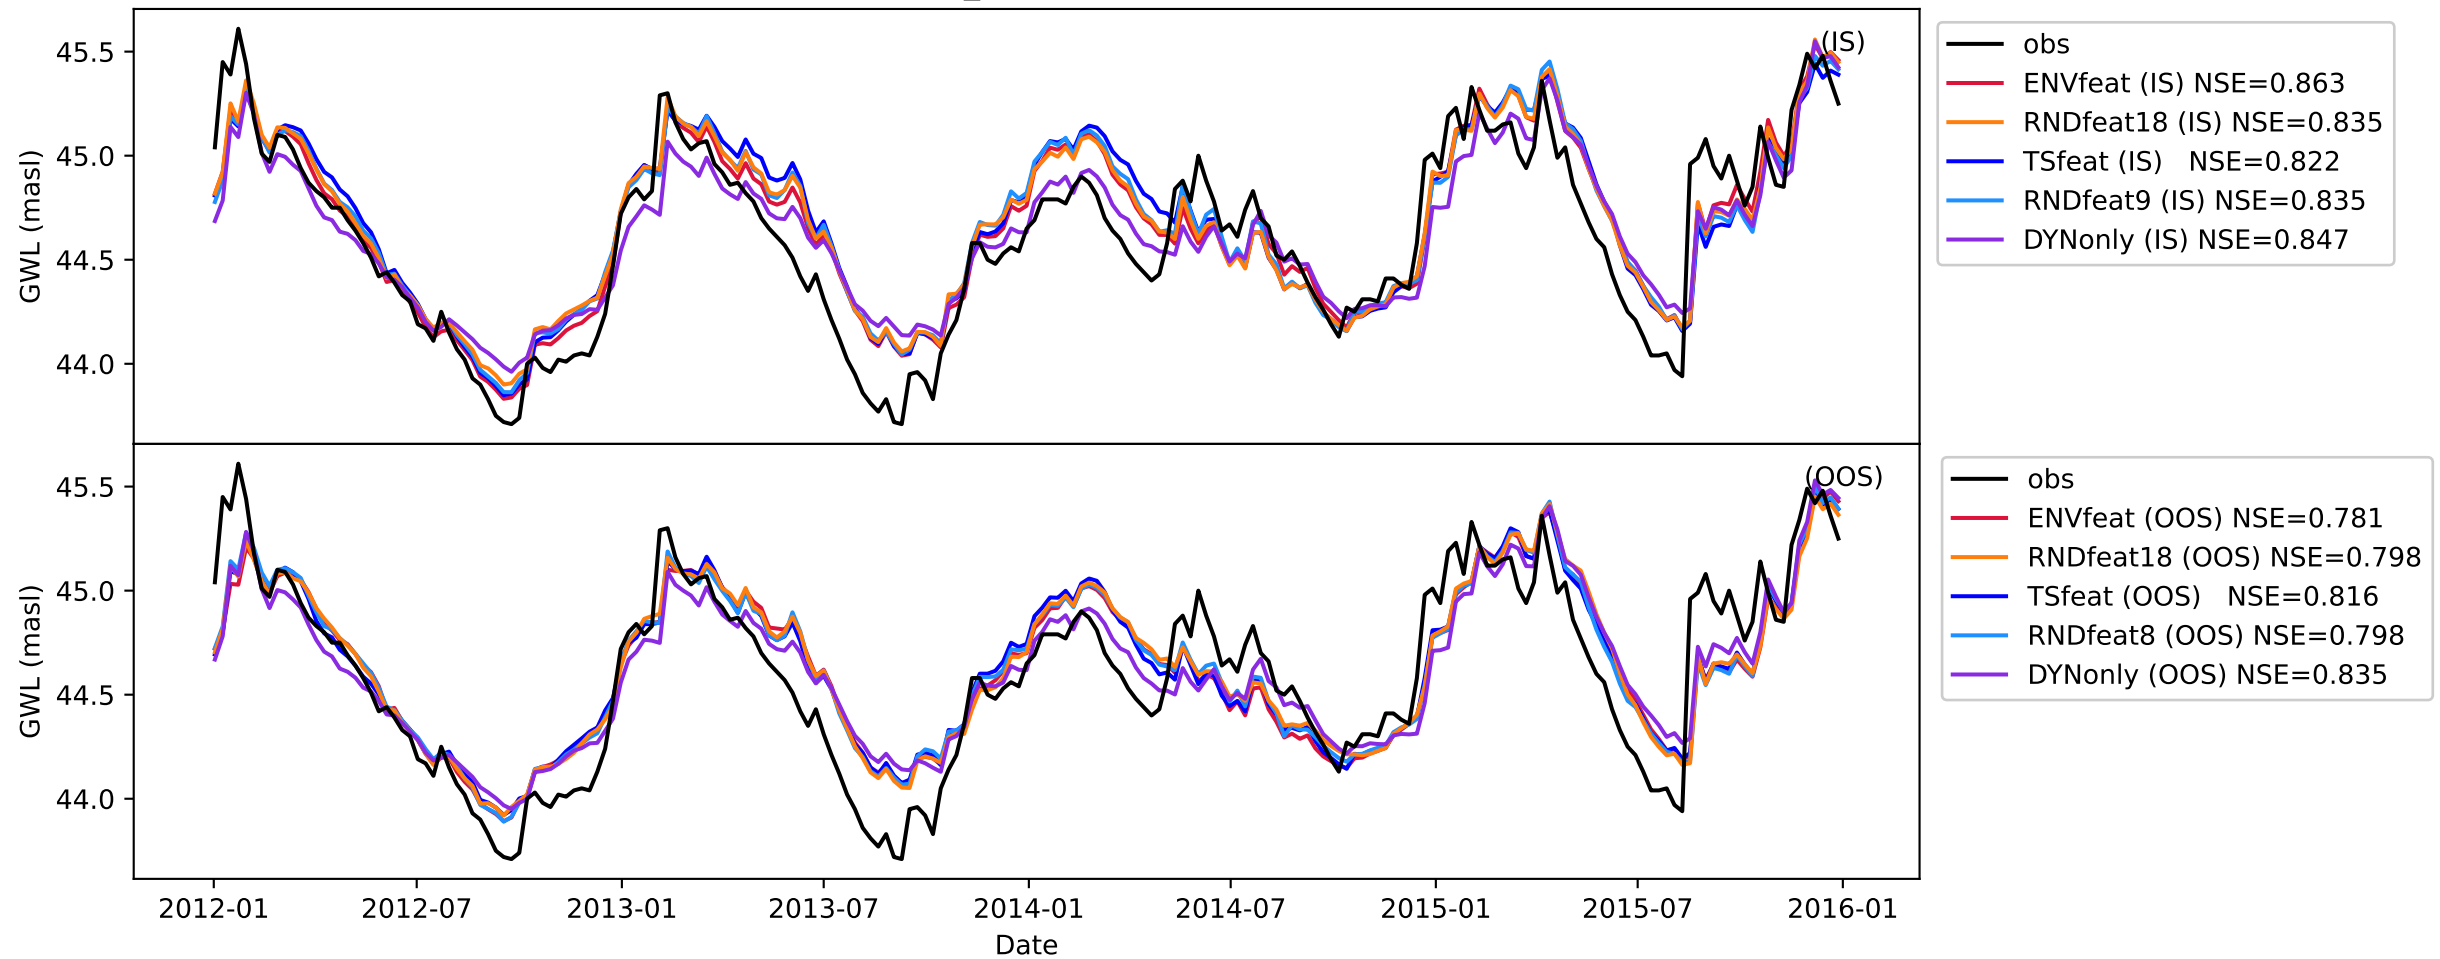

NI\_9700159

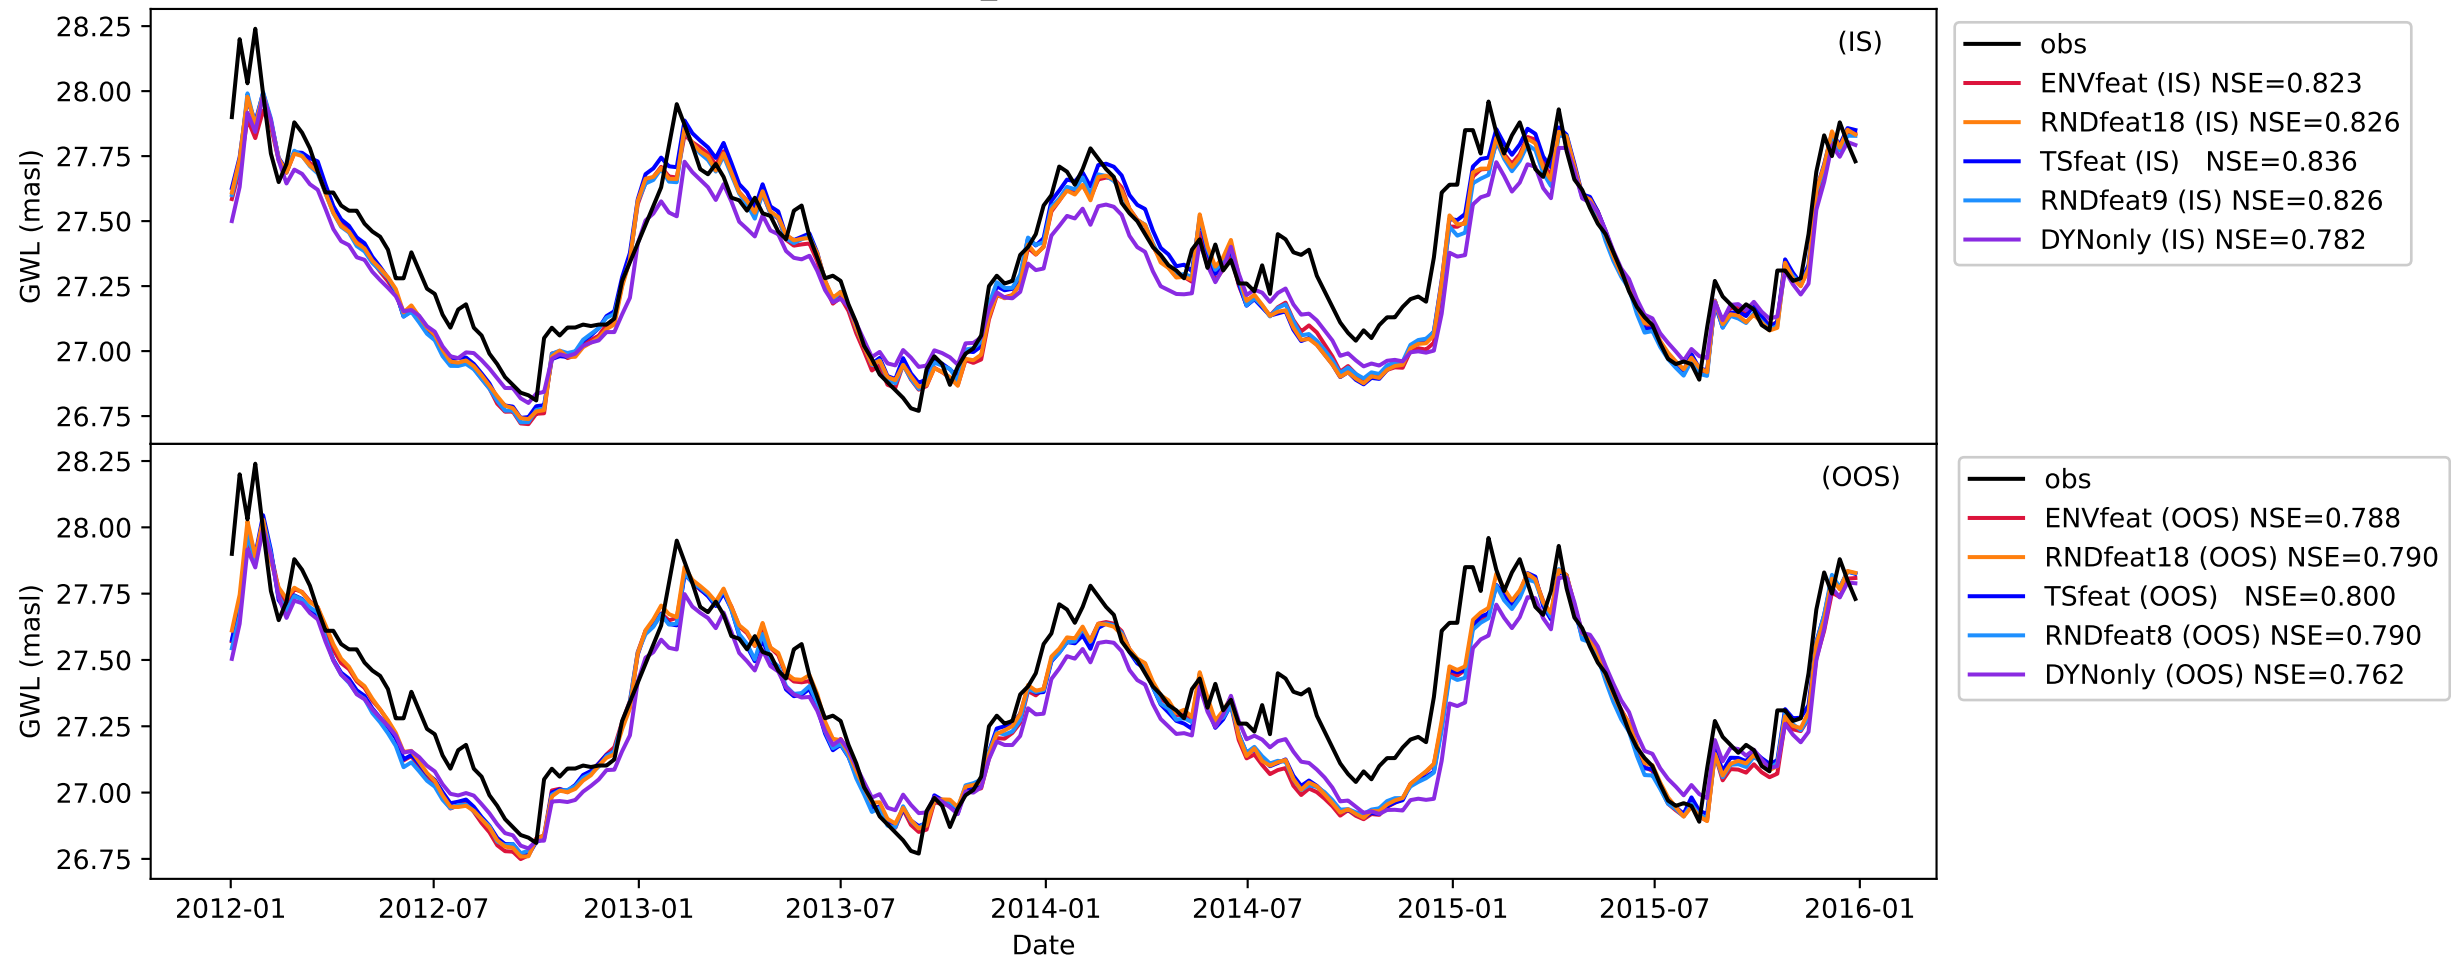

NI\_9840391

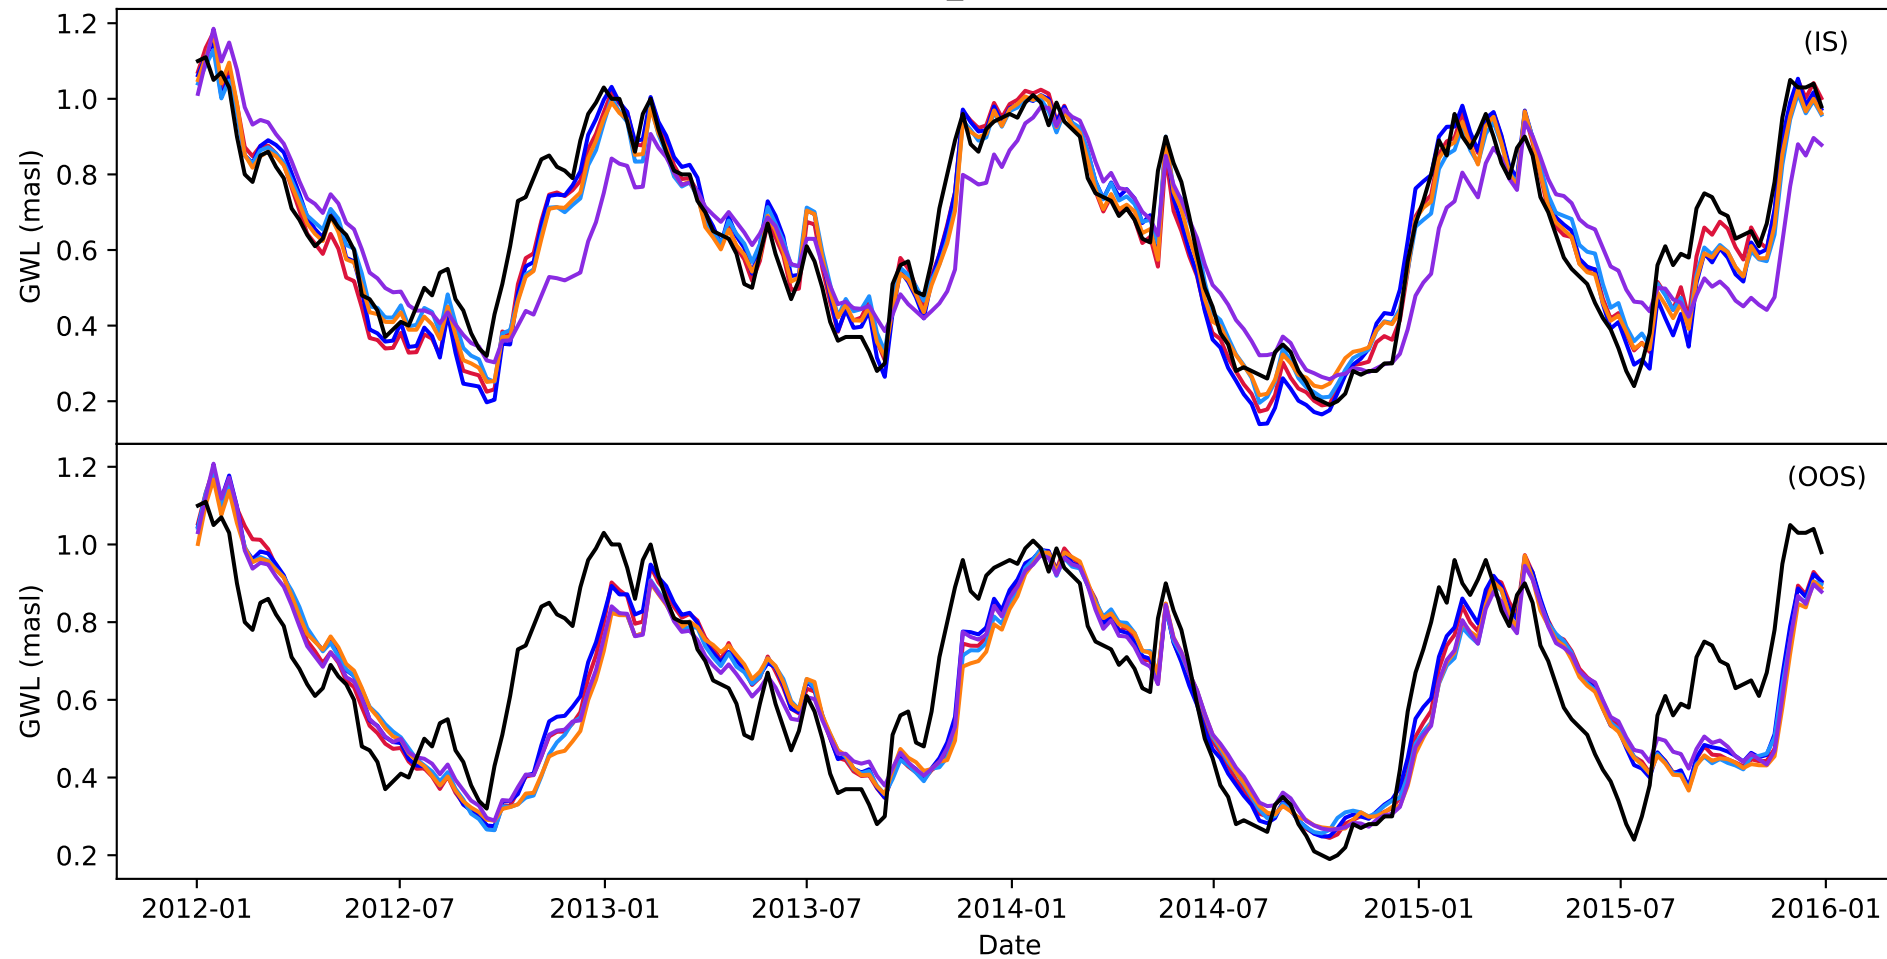

- obs
- ENVfeat (IS) NSE=0.895
- RNDfeat18 (IS) NSE=0.877
- TSfeat (IS) NSE=0.869
- RNDfeat9 (IS) NSE=0.877
- DYOnly (IS) NSE=0.655

- obs
- ENVfeat (OOS) NSE=0.590
- RNDfeat18 (OOS) NSE=0.536
- TSfeat (OOS) NSE=0.649
- RNDfeat8 (OOS) NSE=0.536
- DYOnly (OOS) NSE=0.625

NI\_9840901

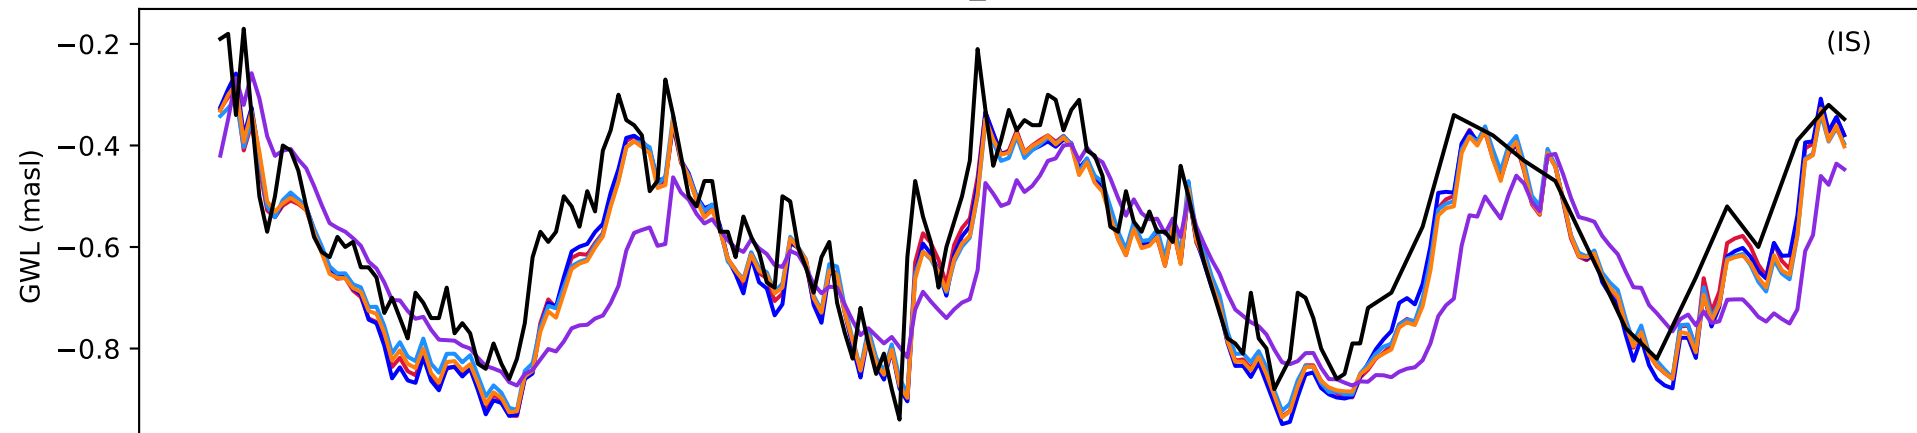

- obs
- ENVfeat (IS) NSE=0.707
- RNDfeat18 (IS) NSE=0.700
- TSfeat (IS) NSE=0.691
- RNDfeat9 (IS) NSE=0.700
- DYNonly (IS) NSE=0.303

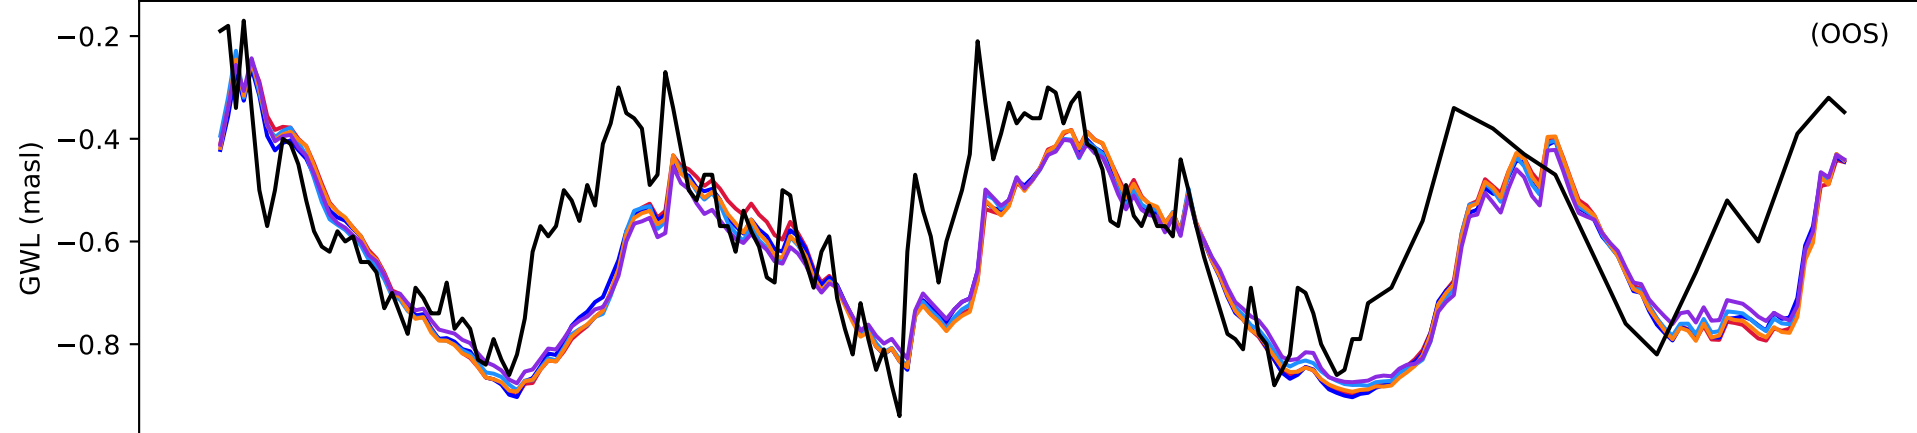

- obs
- ENVfeat (OOS) NSE=0.196
- RNDfeat18 (OOS) NSE=0.210
- TSfeat (OOS) NSE=0.264
- RNDfeat8 (OOS) NSE=0.210
- DYNonly (OOS) NSE=0.271

2012-01      2012-07      2013-01      2013-07      2014-01      2014-07      2015-01      2015-07      2016-01

Date

NI\_9853172

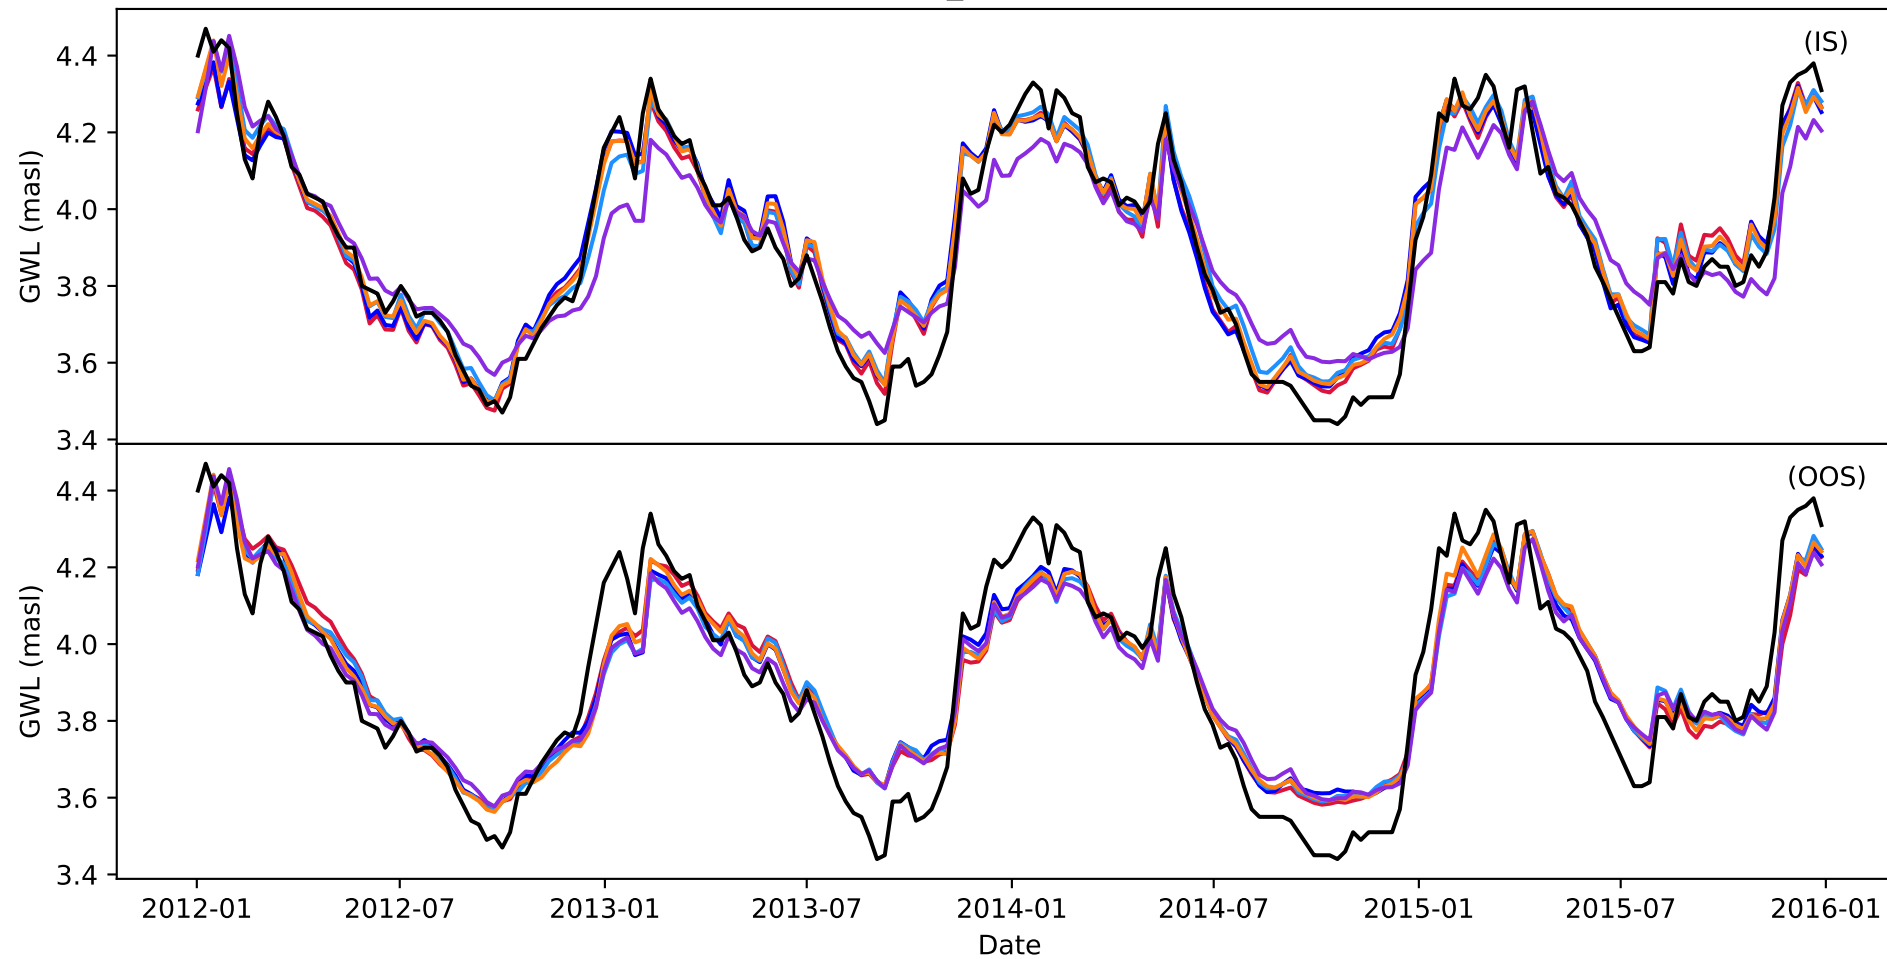

- obs
- ENVfeat (IS) NSE=0.939
- RNDfeat18 (IS) NSE=0.936
- TSfeat (IS) NSE=0.935
- RNDfeat9 (IS) NSE=0.936
- DYNonly (IS) NSE=0.858

- obs
- ENVfeat (OOS) NSE=0.861
- RNDfeat18 (OOS) NSE=0.851
- TSfeat (OOS) NSE=0.879
- RNDfeat8 (OOS) NSE=0.851
- DYNonly (OOS) NSE=0.861

NI\_40000175

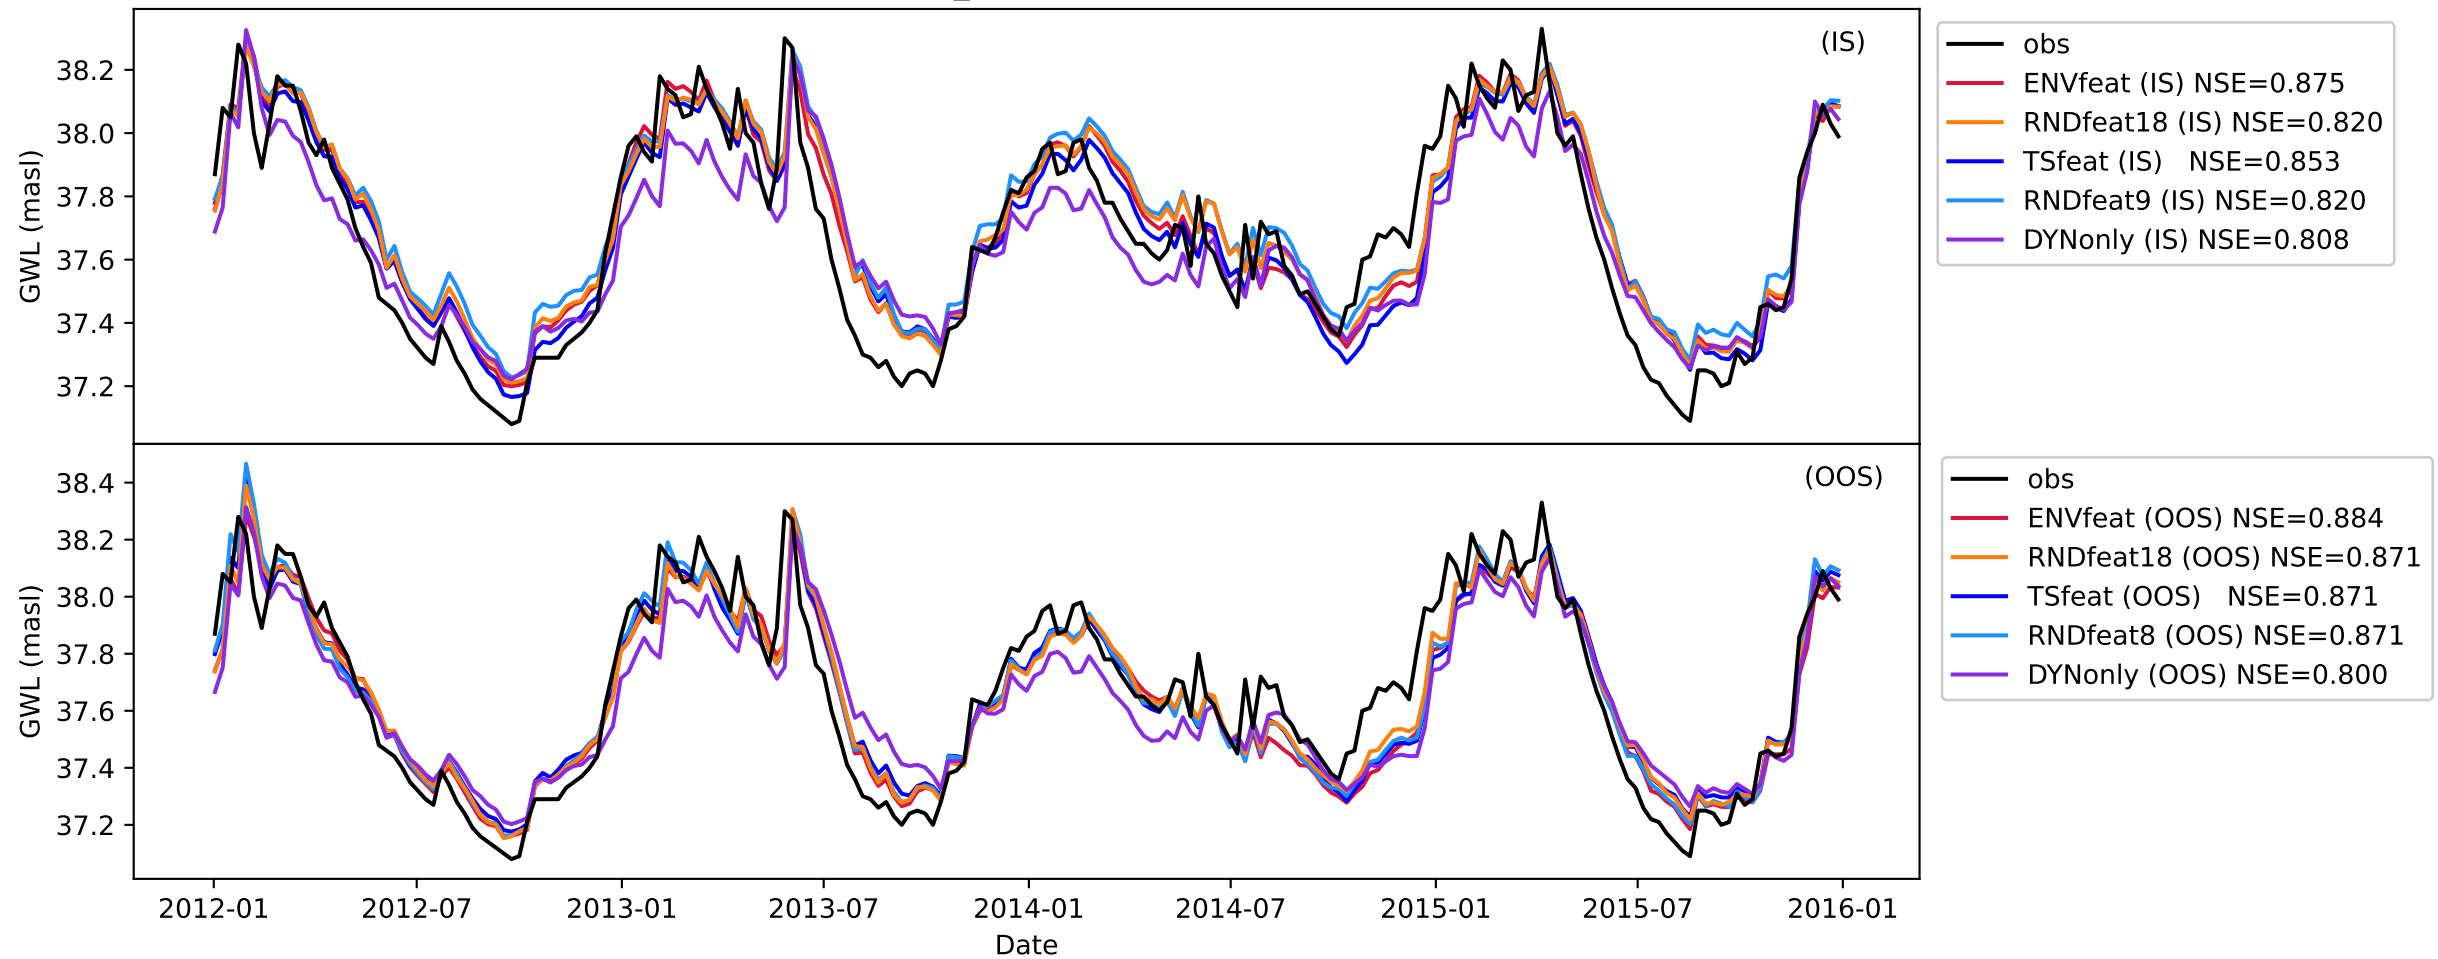



# NI\_40000233

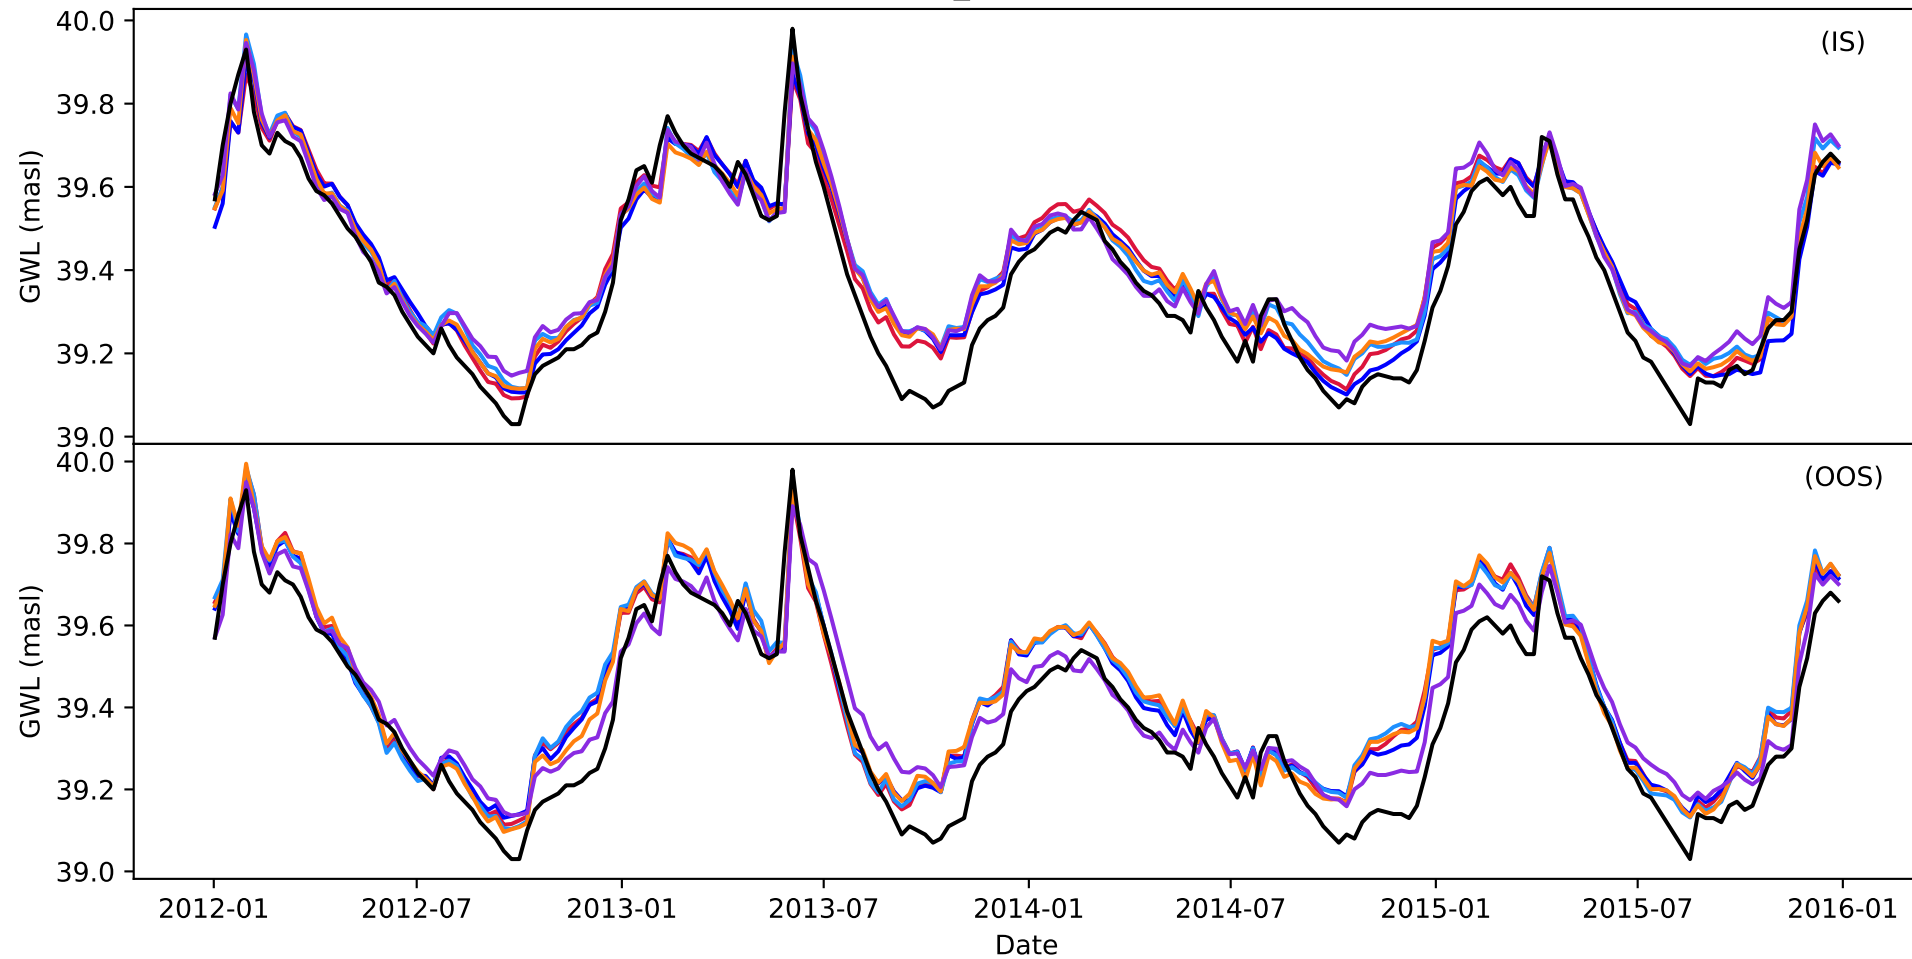

- obs
- ENVfeat (IS) NSE=0.932
- RNDfeat18 (IS) NSE=0.917
- TSfeat (IS) NSE=0.932
- RNDfeat9 (IS) NSE=0.917
- DYNOnly (IS) NSE=0.898

- obs
- ENVfeat (OOS) NSE=0.828
- RNDfeat18 (OOS) NSE=0.838
- TSfeat (OOS) NSE=0.859
- RNDfeat8 (OOS) NSE=0.838
- DYNOnly (OOS) NSE=0.913

NI\_40501911

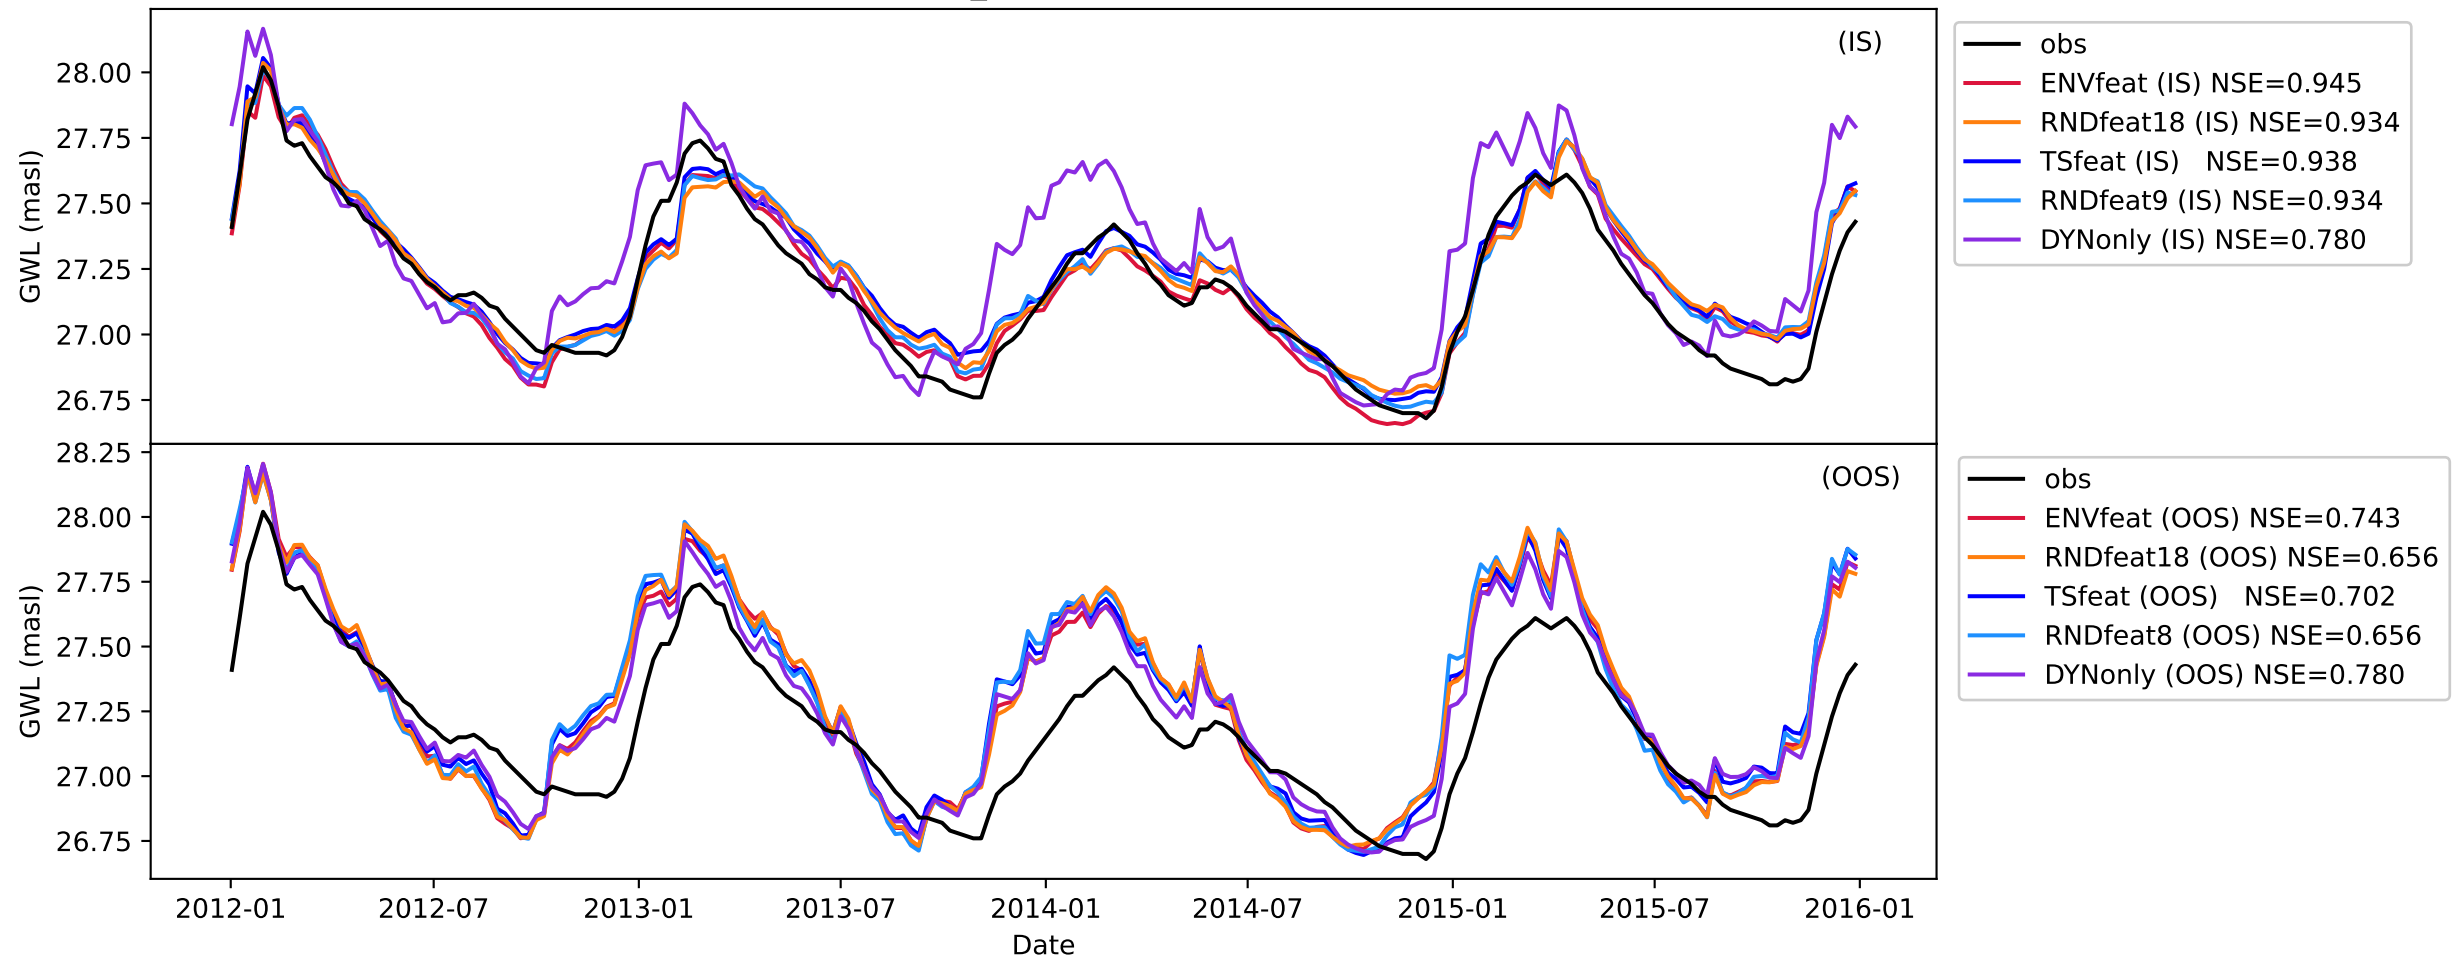

NI\_100000728

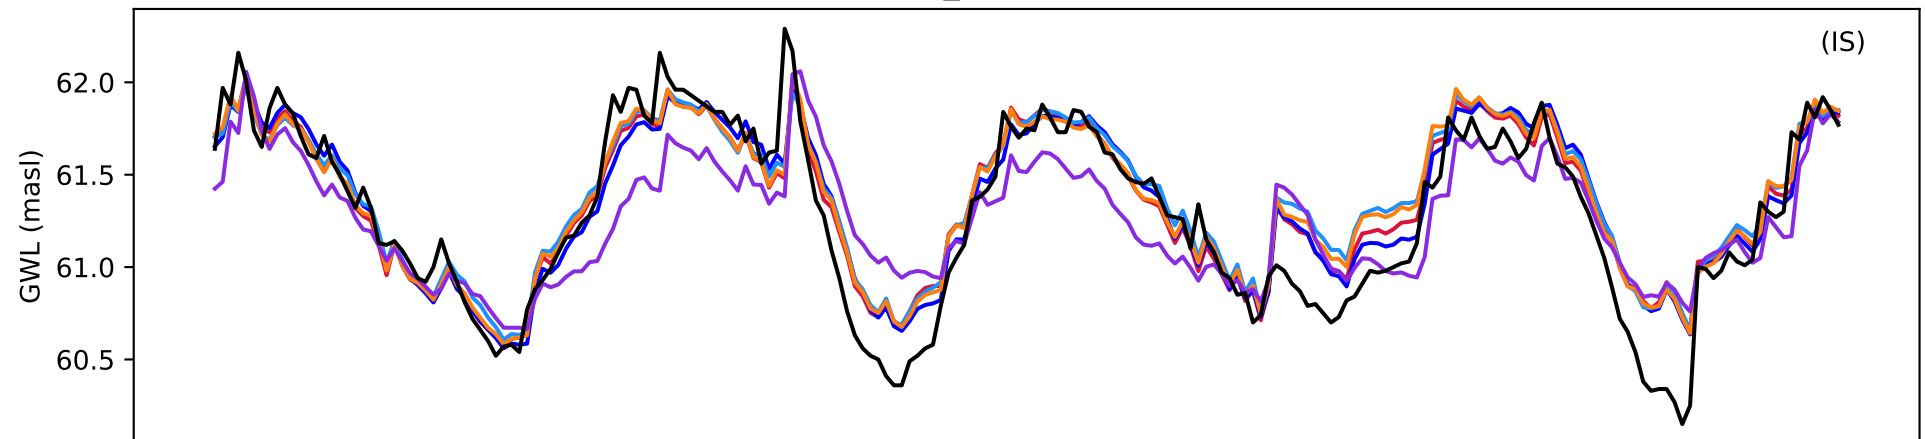

- obs
- ENVfeat (IS) NSE=0.843
- RNDfeat18 (IS) NSE=0.811
- TSfeat (IS) NSE=0.854
- RNDfeat9 (IS) NSE=0.811
- DYNSonly (IS) NSE=0.645

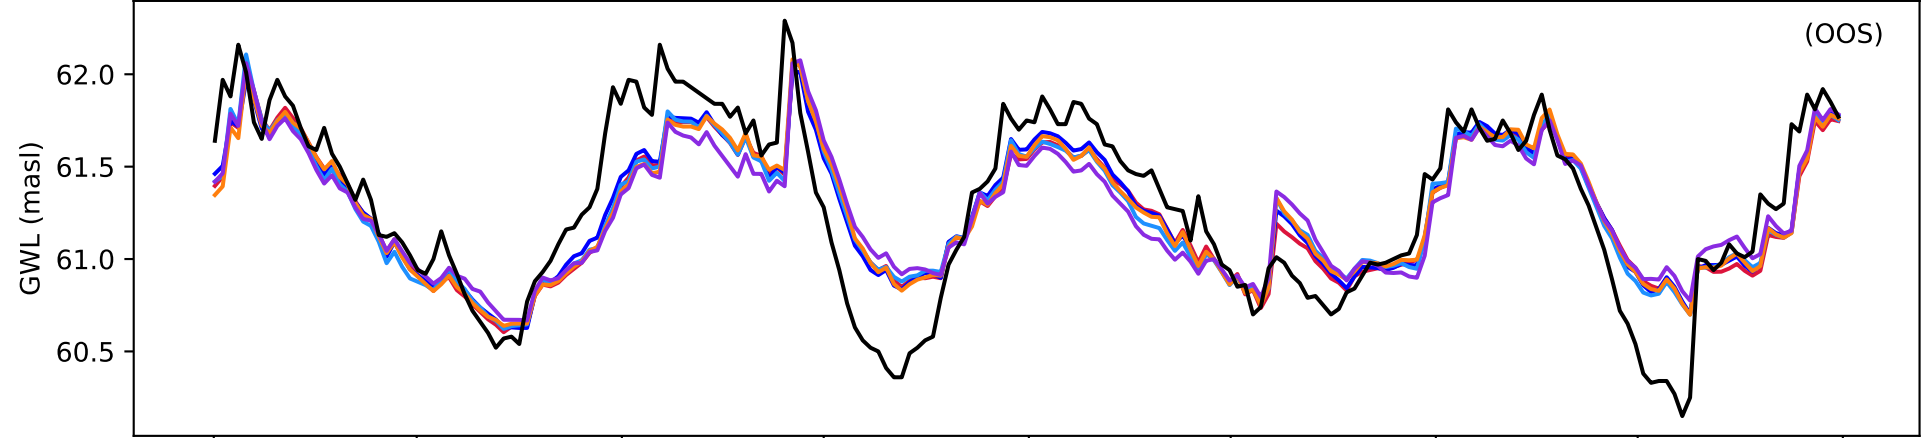

- obs
- ENVfeat (OOS) NSE=0.724
- RNDfeat18 (OOS) NSE=0.718
- TSfeat (OOS) NSE=0.763
- RNDfeat8 (OOS) NSE=0.718
- DYNSonly (OOS) NSE=0.655

2012-01      2012-07      2013-01      2013-07      2014-01      2014-07      2015-01      2015-07      2016-01

Date

NI\_100000842

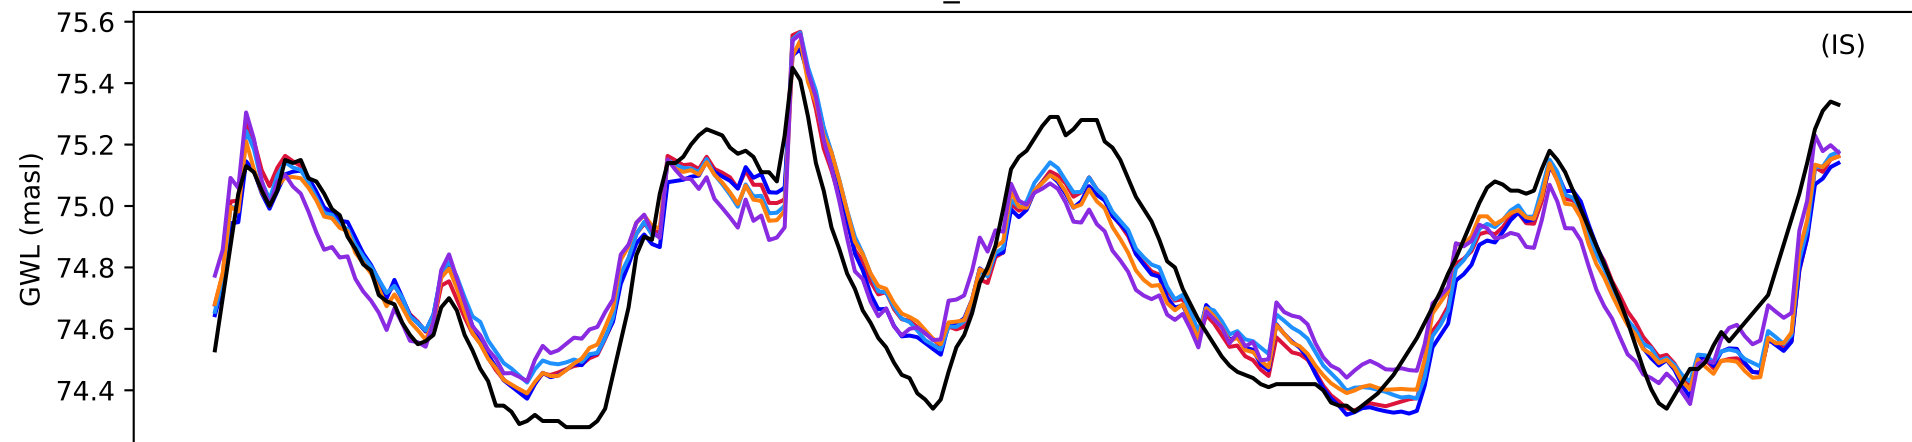

- obs
- ENVfeat (IS) NSE=0.854
- RNDfeat18 (IS) NSE=0.832
- TSfeat (IS) NSE=0.852
- RNDfeat9 (IS) NSE=0.832
- DYNOnly (IS) NSE=0.786

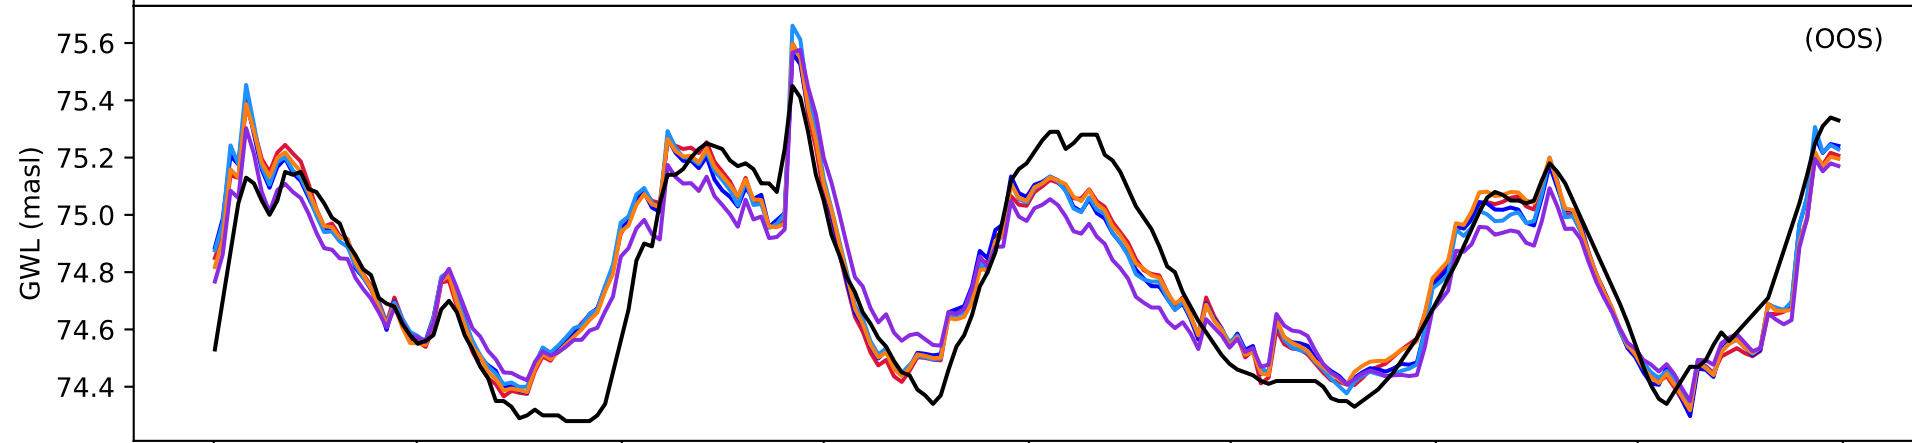

- obs
- ENVfeat (OOS) NSE=0.801
- RNDfeat18 (OOS) NSE=0.795
- TSfeat (OOS) NSE=0.774
- RNDfeat8 (OOS) NSE=0.795
- DYNOnly (OOS) NSE=0.798

2012-01      2012-07      2013-01      2013-07      2014-01      2014-07      2015-01      2015-07      2016-01

Date

# NI\_100000926

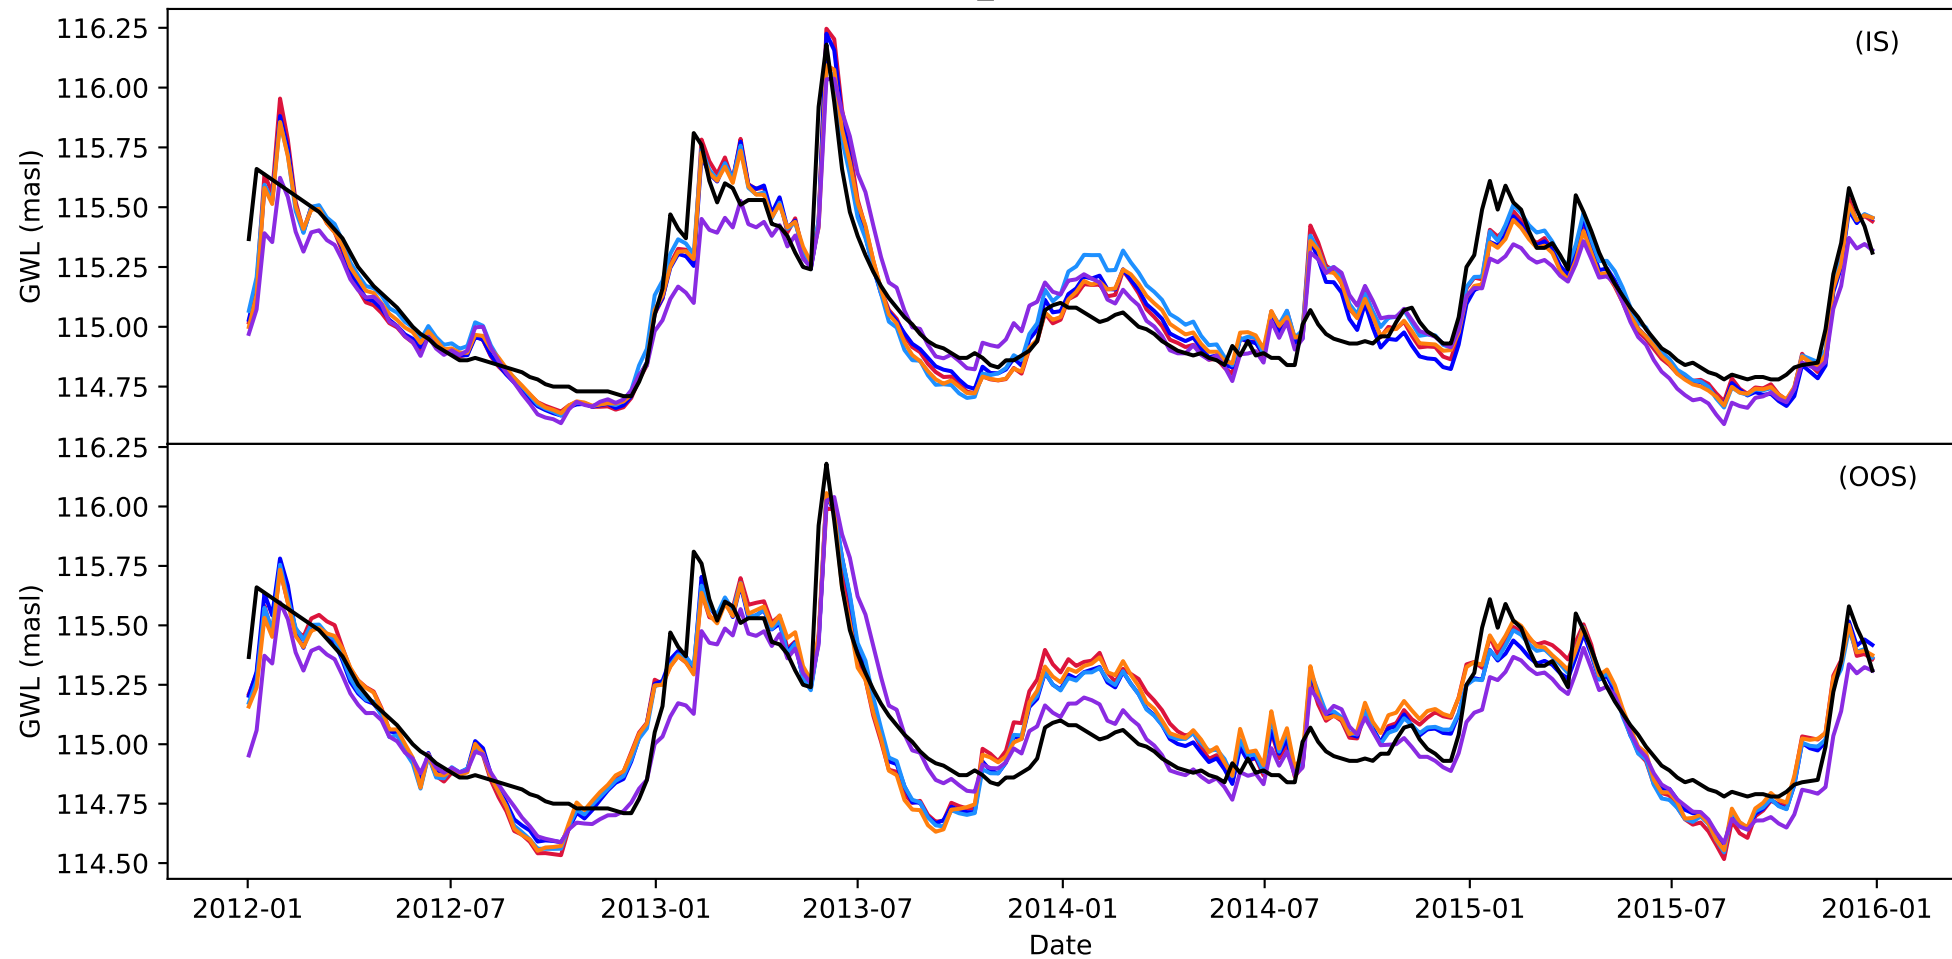

- obs
- ENVfeat (IS) NSE=0.833
- RNDfeat18 (IS) NSE=0.818
- TSfeat (IS) NSE=0.841
- RNDfeat9 (IS) NSE=0.818
- DYNOnly (IS) NSE=0.760

- obs
- ENVfeat (OOS) NSE=0.715
- RNDfeat18 (OOS) NSE=0.740
- TSfeat (OOS) NSE=0.770
- RNDfeat8 (OOS) NSE=0.740
- DYNOnly (OOS) NSE=0.782

NI\_129300060

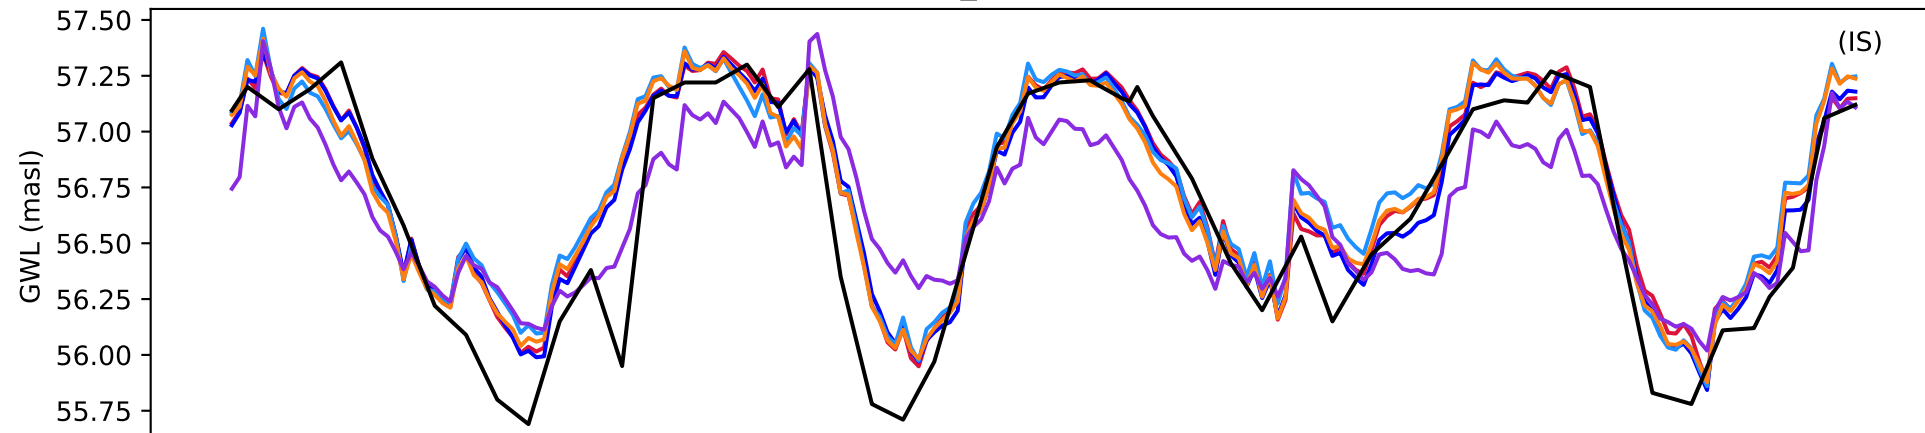

- obs
- ENVfeat (IS) NSE=0.839
- RNDfeat18 (IS) NSE=0.790
- TSfeat (IS) NSE=0.847
- RNDfeat9 (IS) NSE=0.790
- DYNonly (IS) NSE=0.670

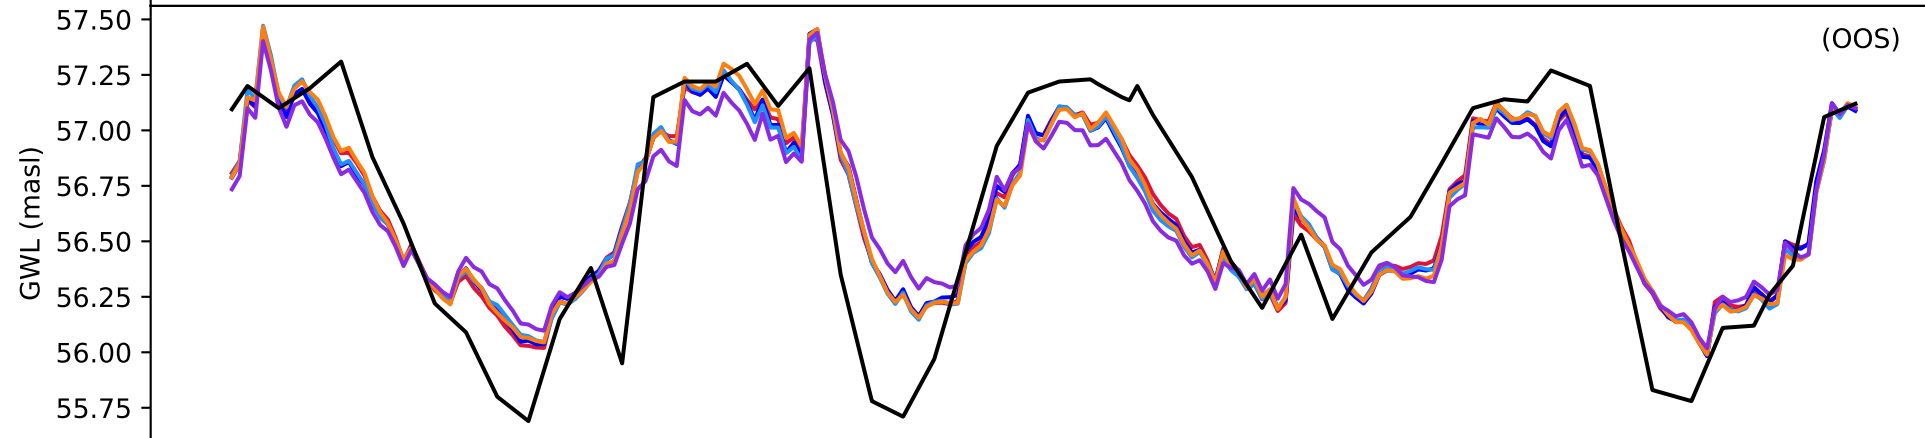

- obs
- ENVfeat (OOS) NSE=0.781
- RNDfeat18 (OOS) NSE=0.740
- TSfeat (OOS) NSE=0.756
- RNDfeat8 (OOS) NSE=0.740
- DYNonly (OOS) NSE=0.675

2012-01      2012-07      2013-01      2013-07      2014-01      2014-07      2015-01      2015-07      2016-01

Date

NI\_200000620

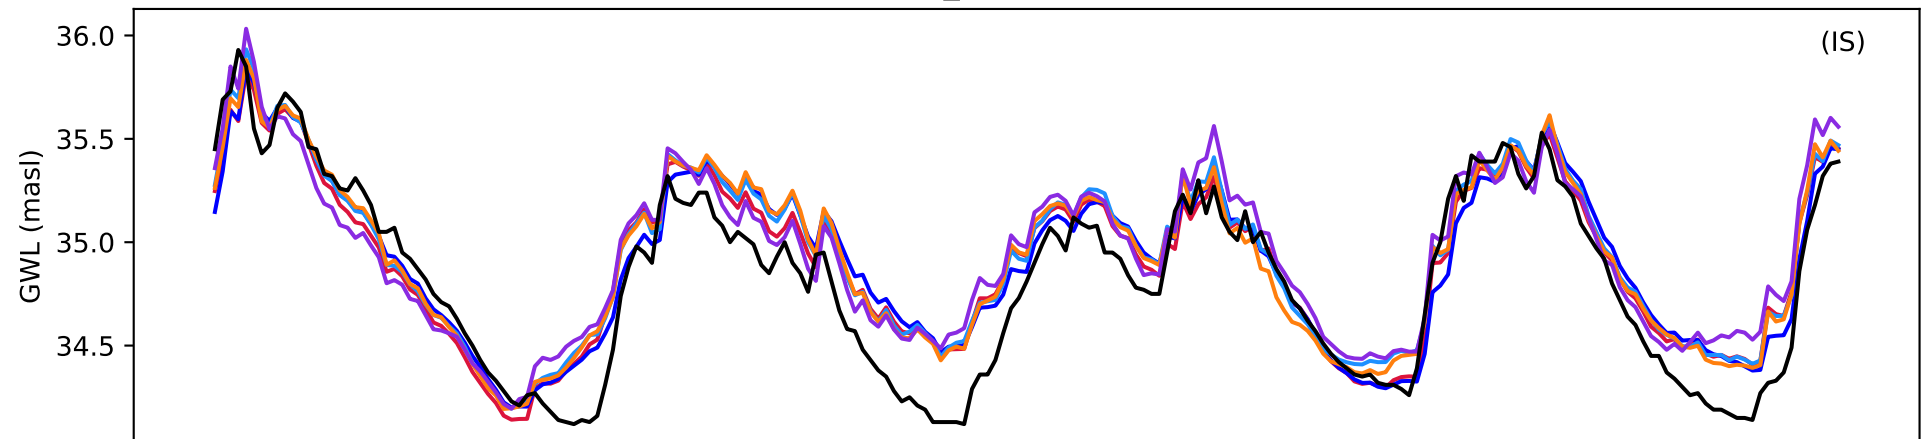

- obs
- ENVfeat (IS) NSE=0.870
- RNDfeat18 (IS) NSE=0.861
- TSfeat (IS) NSE=0.865
- RNDfeat9 (IS) NSE=0.861
- DYNOnly (IS) NSE=0.823

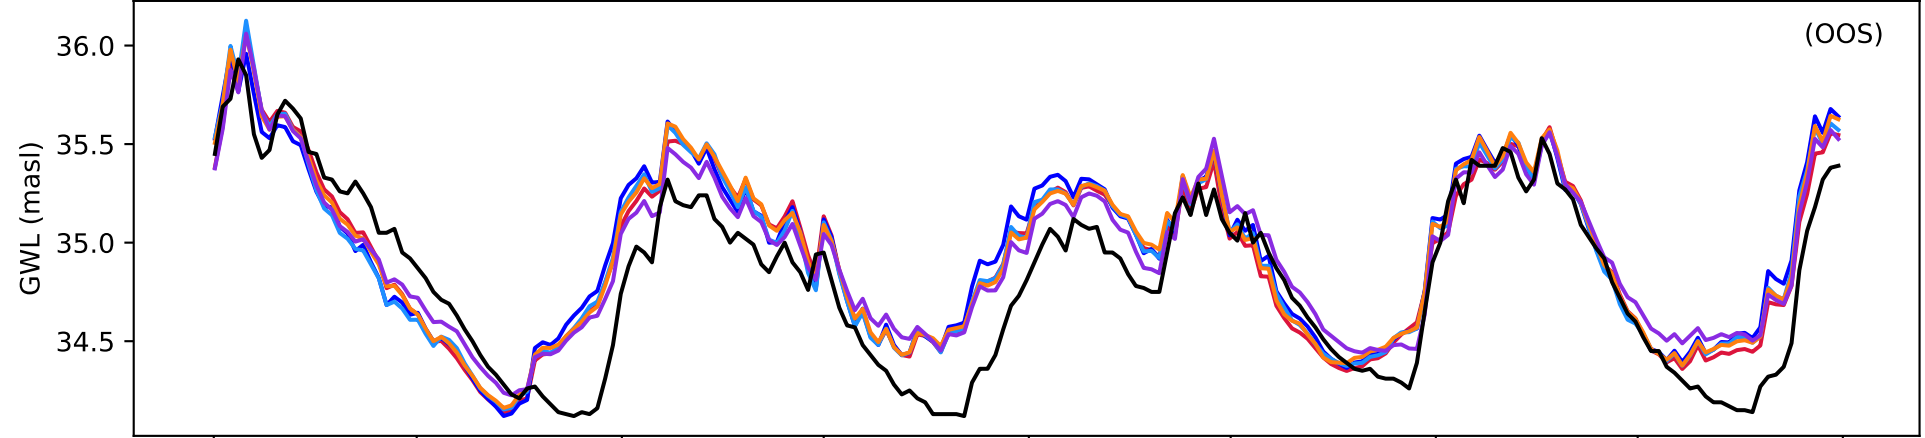

- obs
- ENVfeat (OOS) NSE=0.819
- RNDfeat18 (OOS) NSE=0.794
- TSfeat (OOS) NSE=0.745
- RNDfeat8 (OOS) NSE=0.794
- DYNOnly (OOS) NSE=0.839

2012-01      2012-07      2013-01      2013-07      2014-01      2014-07      2015-01      2015-07      2016-01

Date

NI\_200000788

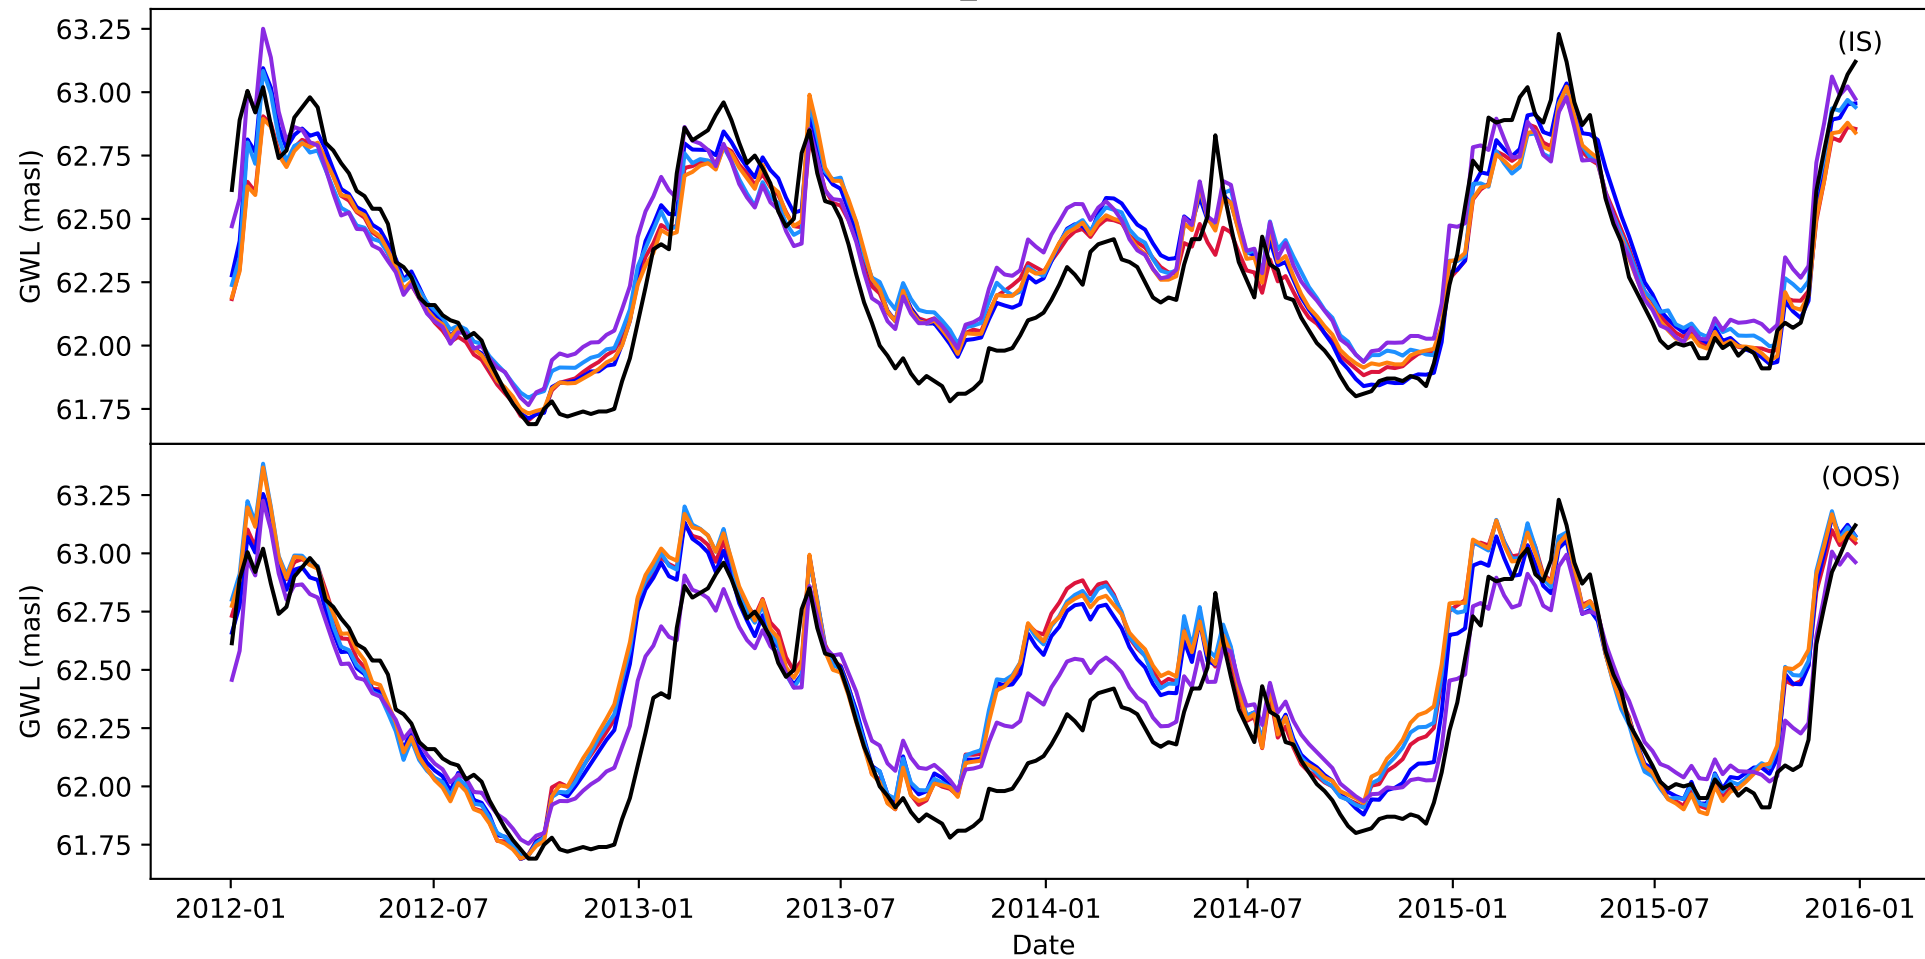

- obs
- ENVfeat (IS) NSE=0.911
- RNDfeat18 (IS) NSE=0.895
- TSfeat (IS) NSE=0.929
- RNDfeat9 (IS) NSE=0.895
- DYNonly (IS) NSE=0.885

- obs
- ENVfeat (OOS) NSE=0.720
- RNDfeat18 (OOS) NSE=0.681
- TSfeat (OOS) NSE=0.756
- RNDfeat8 (OOS) NSE=0.681
- DYNonly (OOS) NSE=0.901



# NI\_200001068

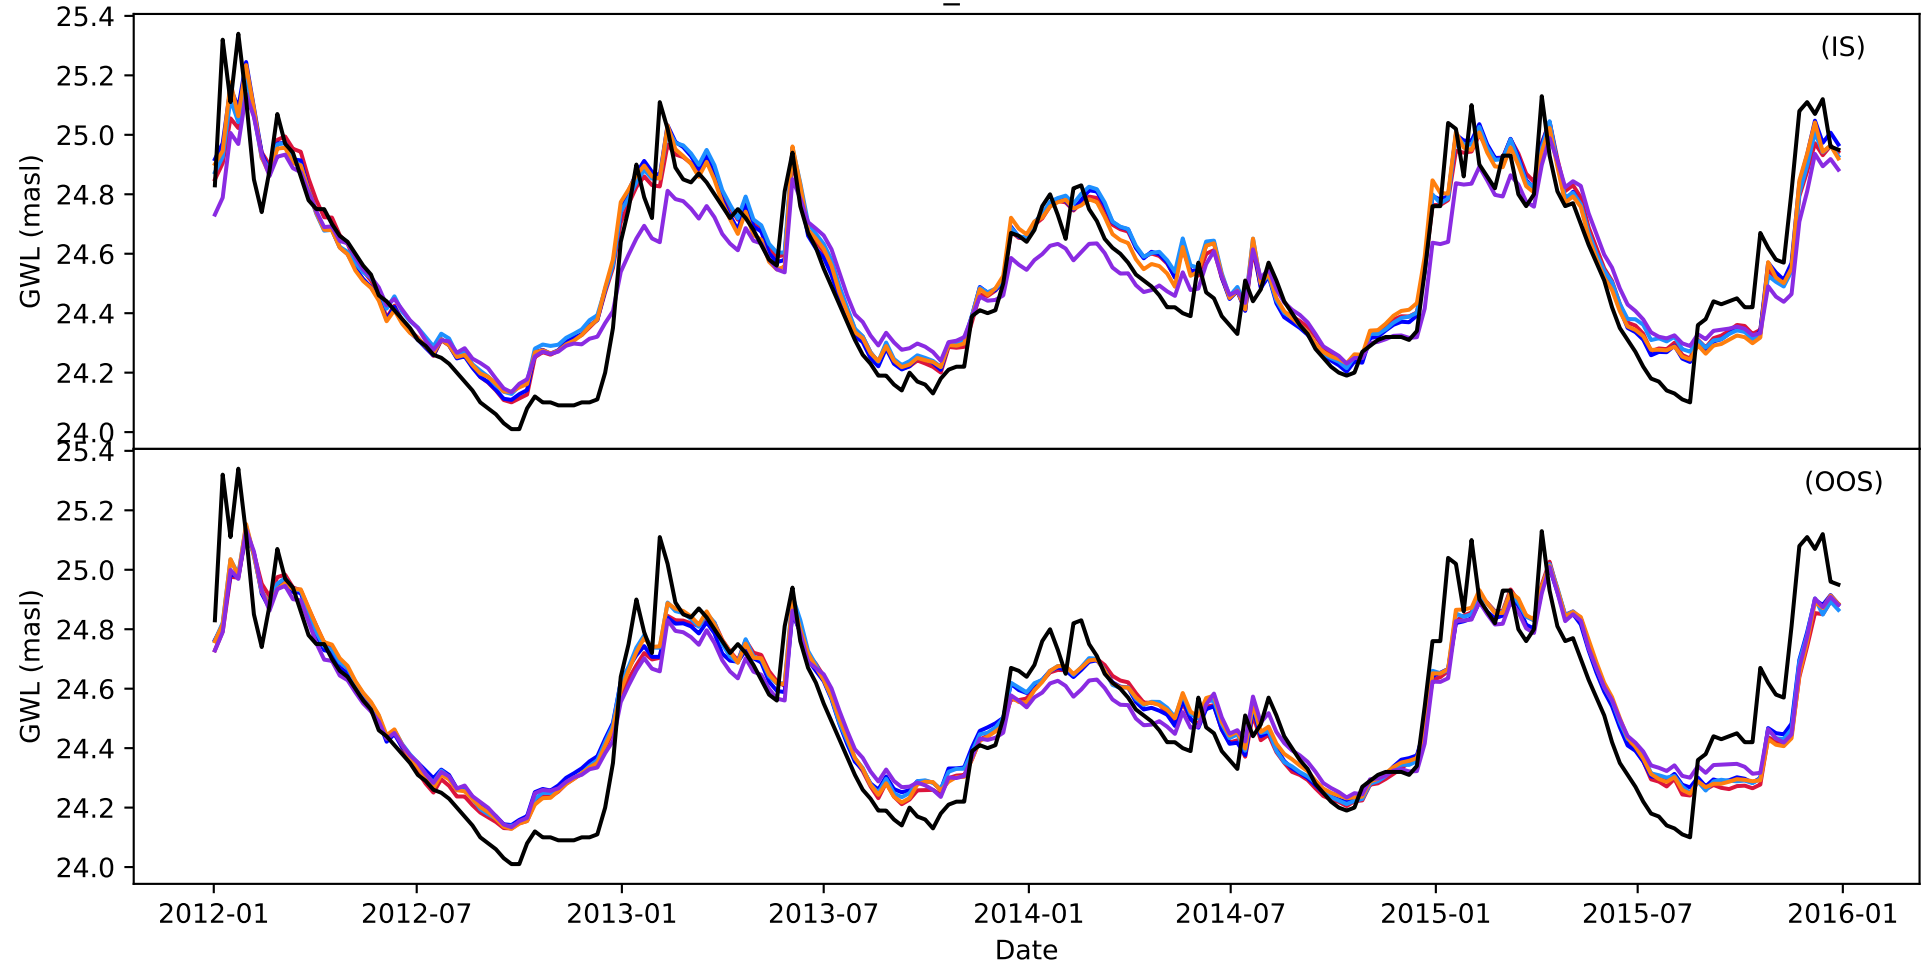

- obs
- ENVfeat (IS) NSE=0.881
- RNDfeat18 (IS) NSE=0.866
- TSfeat (IS) NSE=0.883
- RNDfeat9 (IS) NSE=0.866
- DYNonly (IS) NSE=0.827

- obs
- ENVfeat (OOS) NSE=0.839
- RNDfeat18 (OOS) NSE=0.843
- TSfeat (OOS) NSE=0.843
- RNDfeat8 (OOS) NSE=0.843
- DYNonly (OOS) NSE=0.825

NI\_200001722

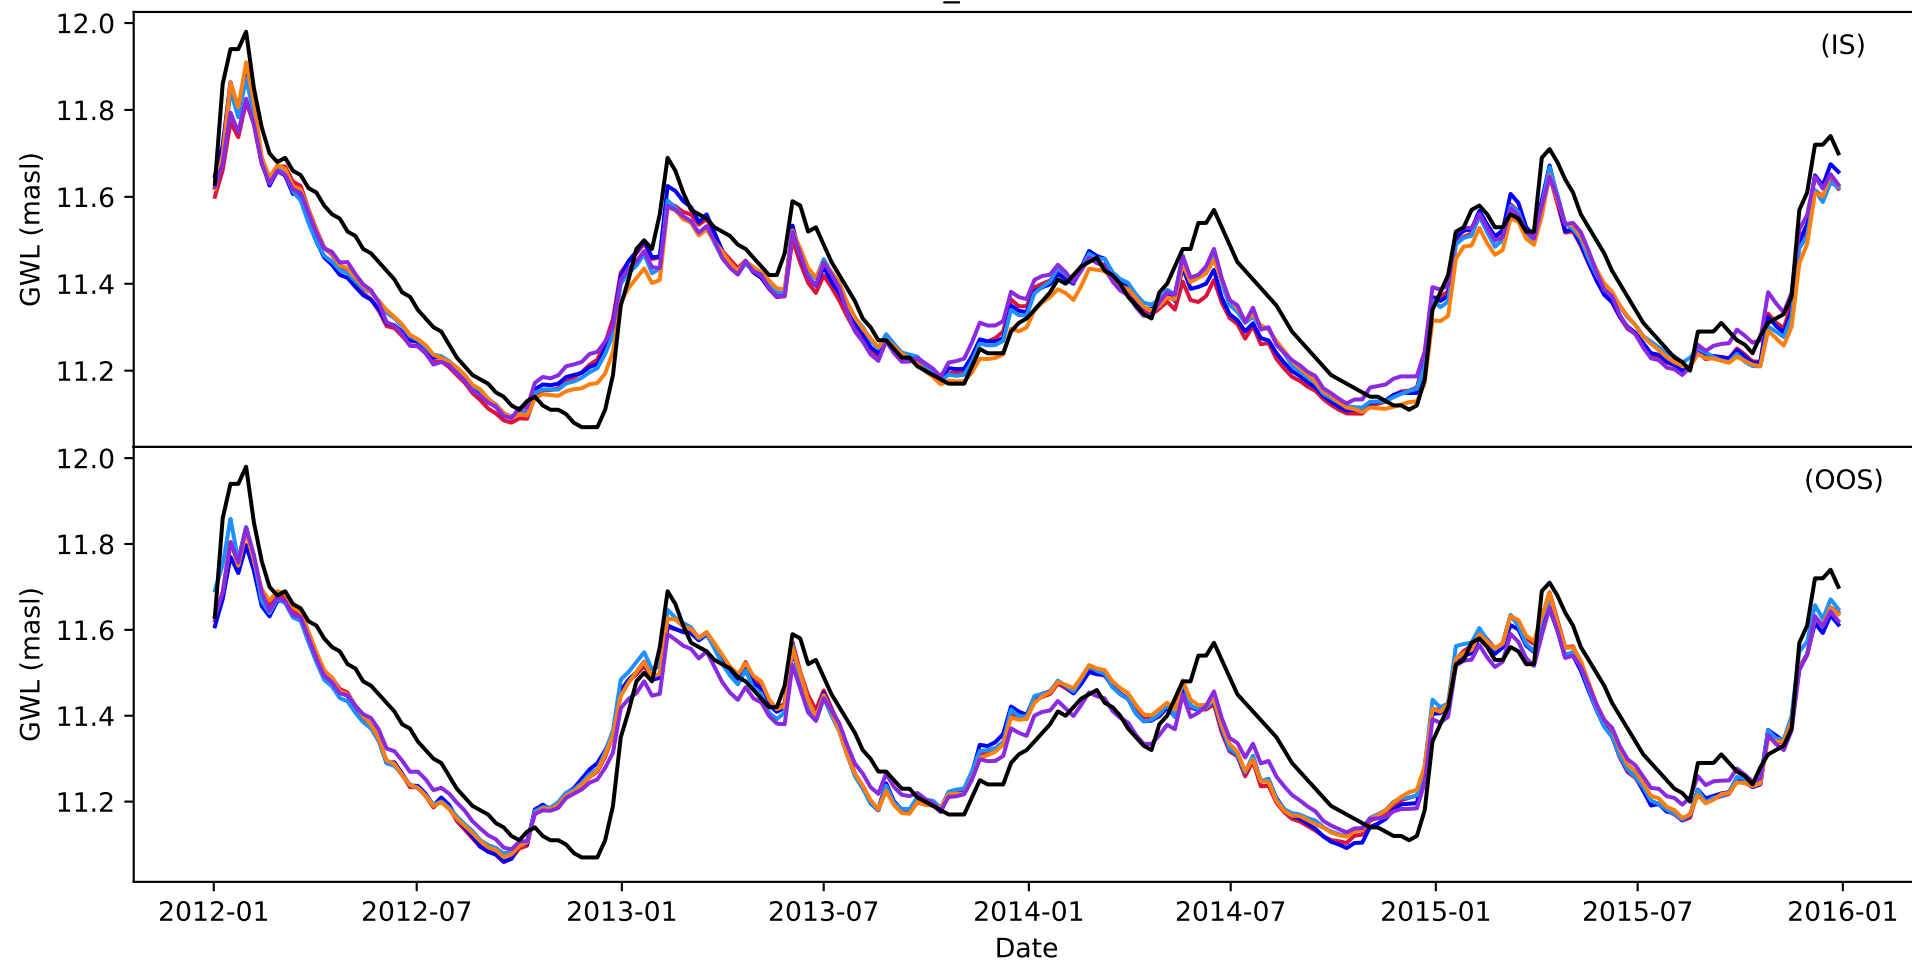

- obs
- ENVfeat (IS) NSE=0.838
- RNDfeat18 (IS) NSE=0.884
- TSfeat (IS) NSE=0.876
- RNDfeat9 (IS) NSE=0.884
- DYNonly (IS) NSE=0.875

- obs
- ENVfeat (OOS) NSE=0.814
- RNDfeat18 (OOS) NSE=0.823
- TSfeat (OOS) NSE=0.798
- RNDfeat8 (OOS) NSE=0.823
- DYNonly (OOS) NSE=0.877

NI\_200002153

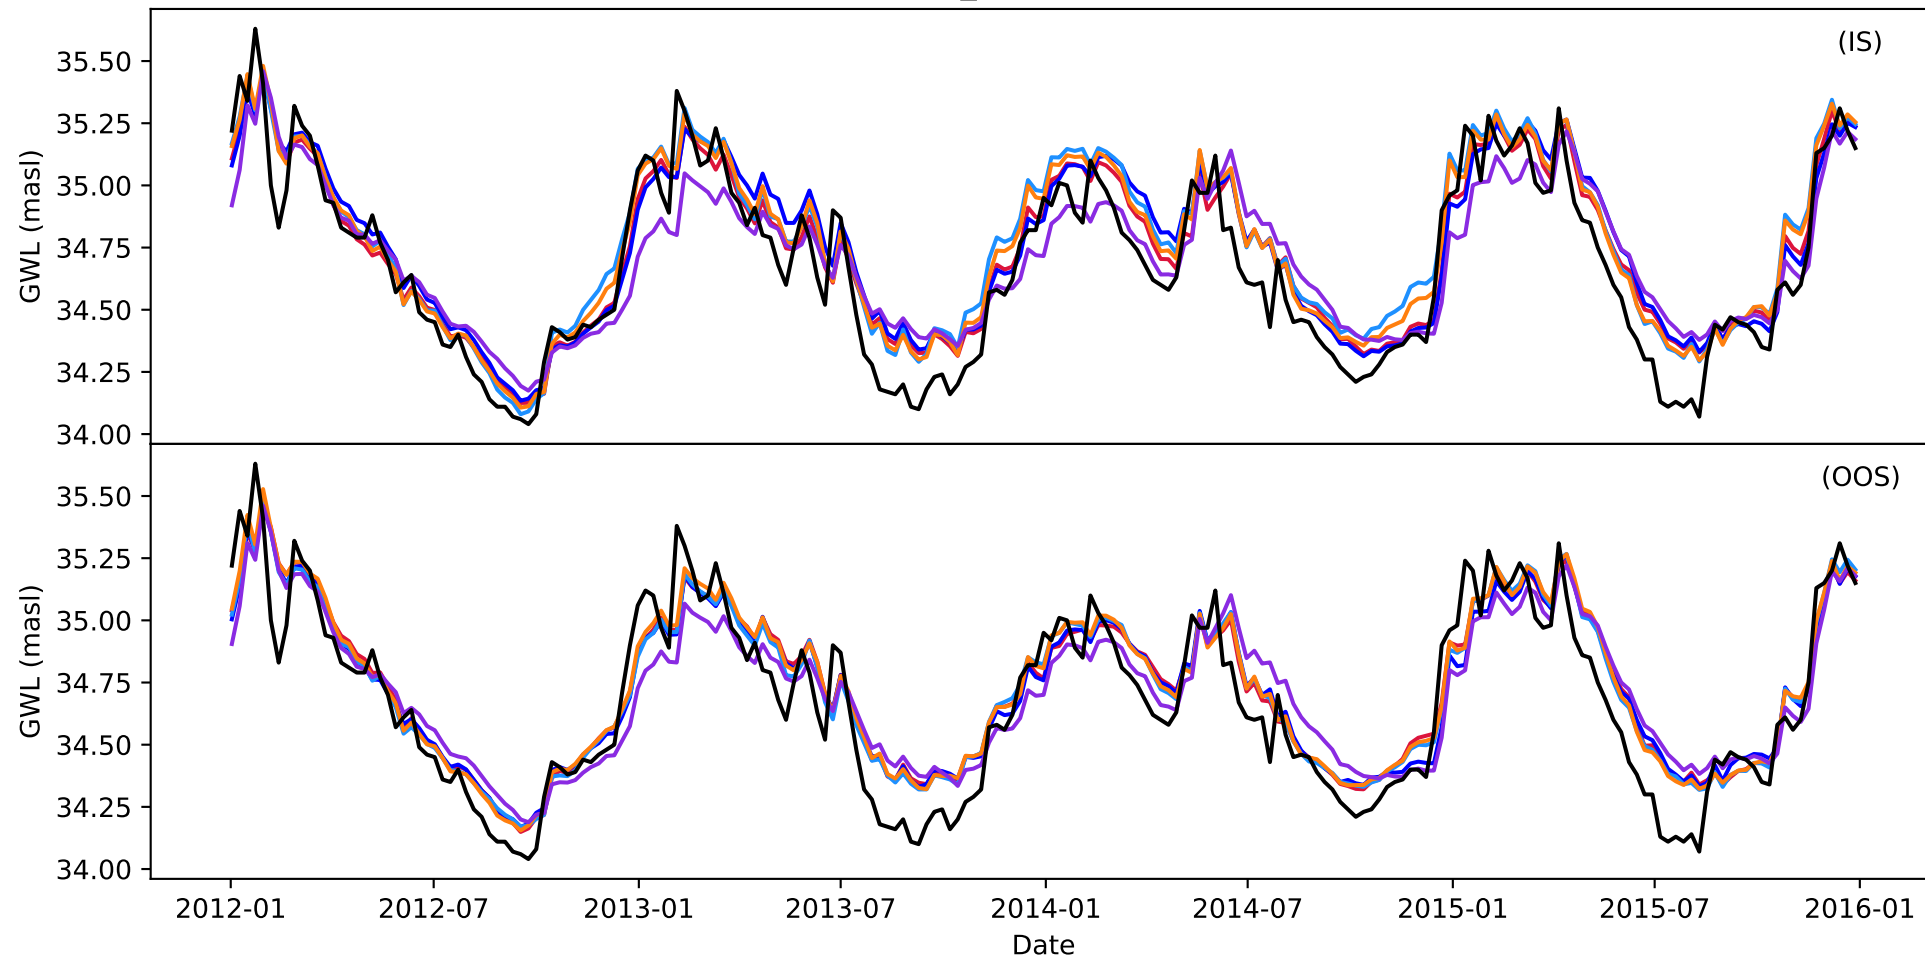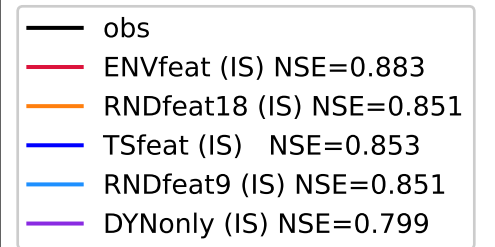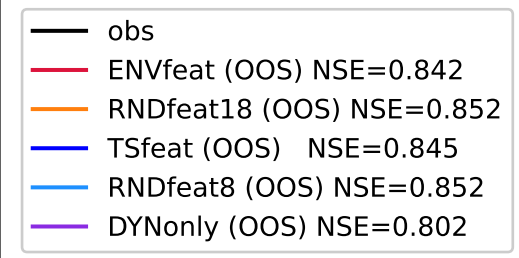

NI\_400080190

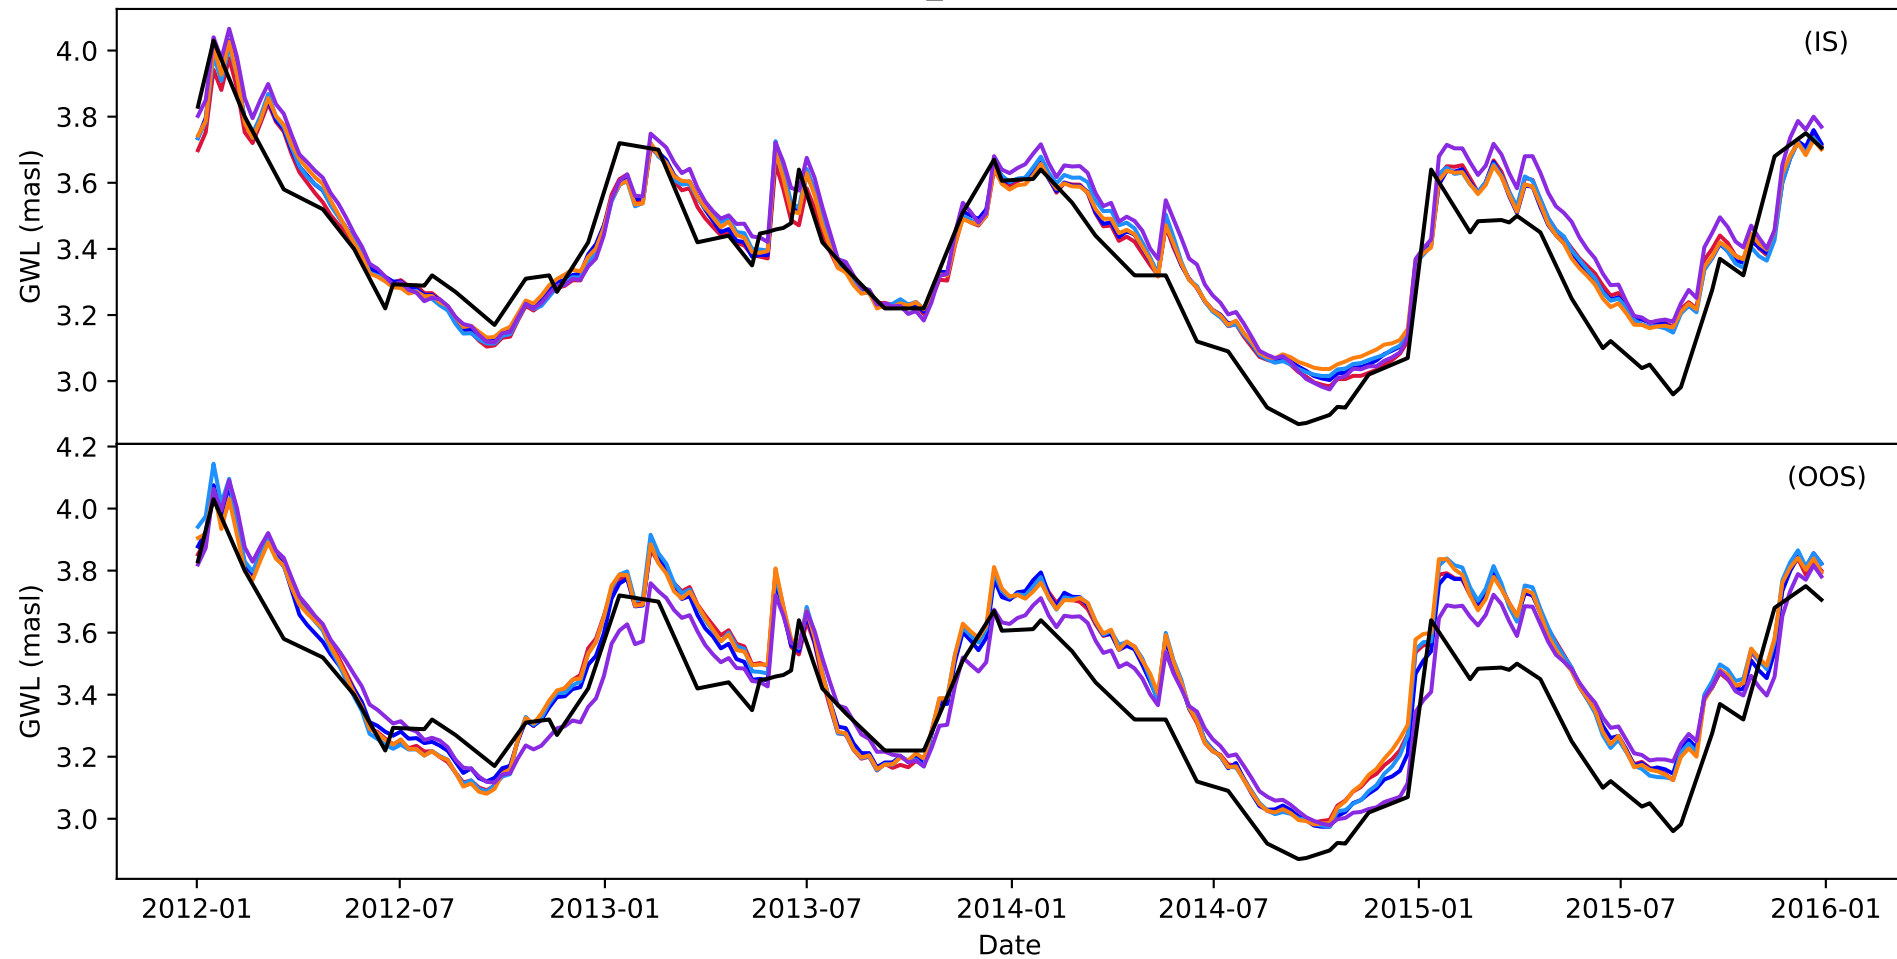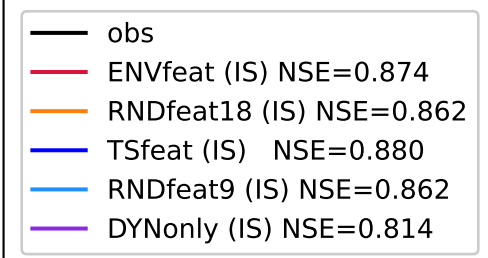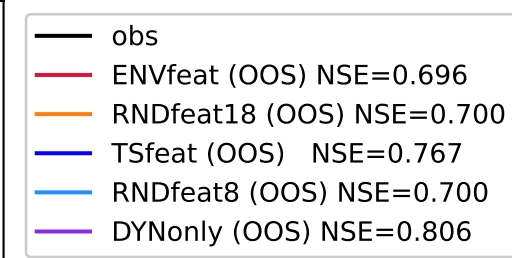

NI\_400081660

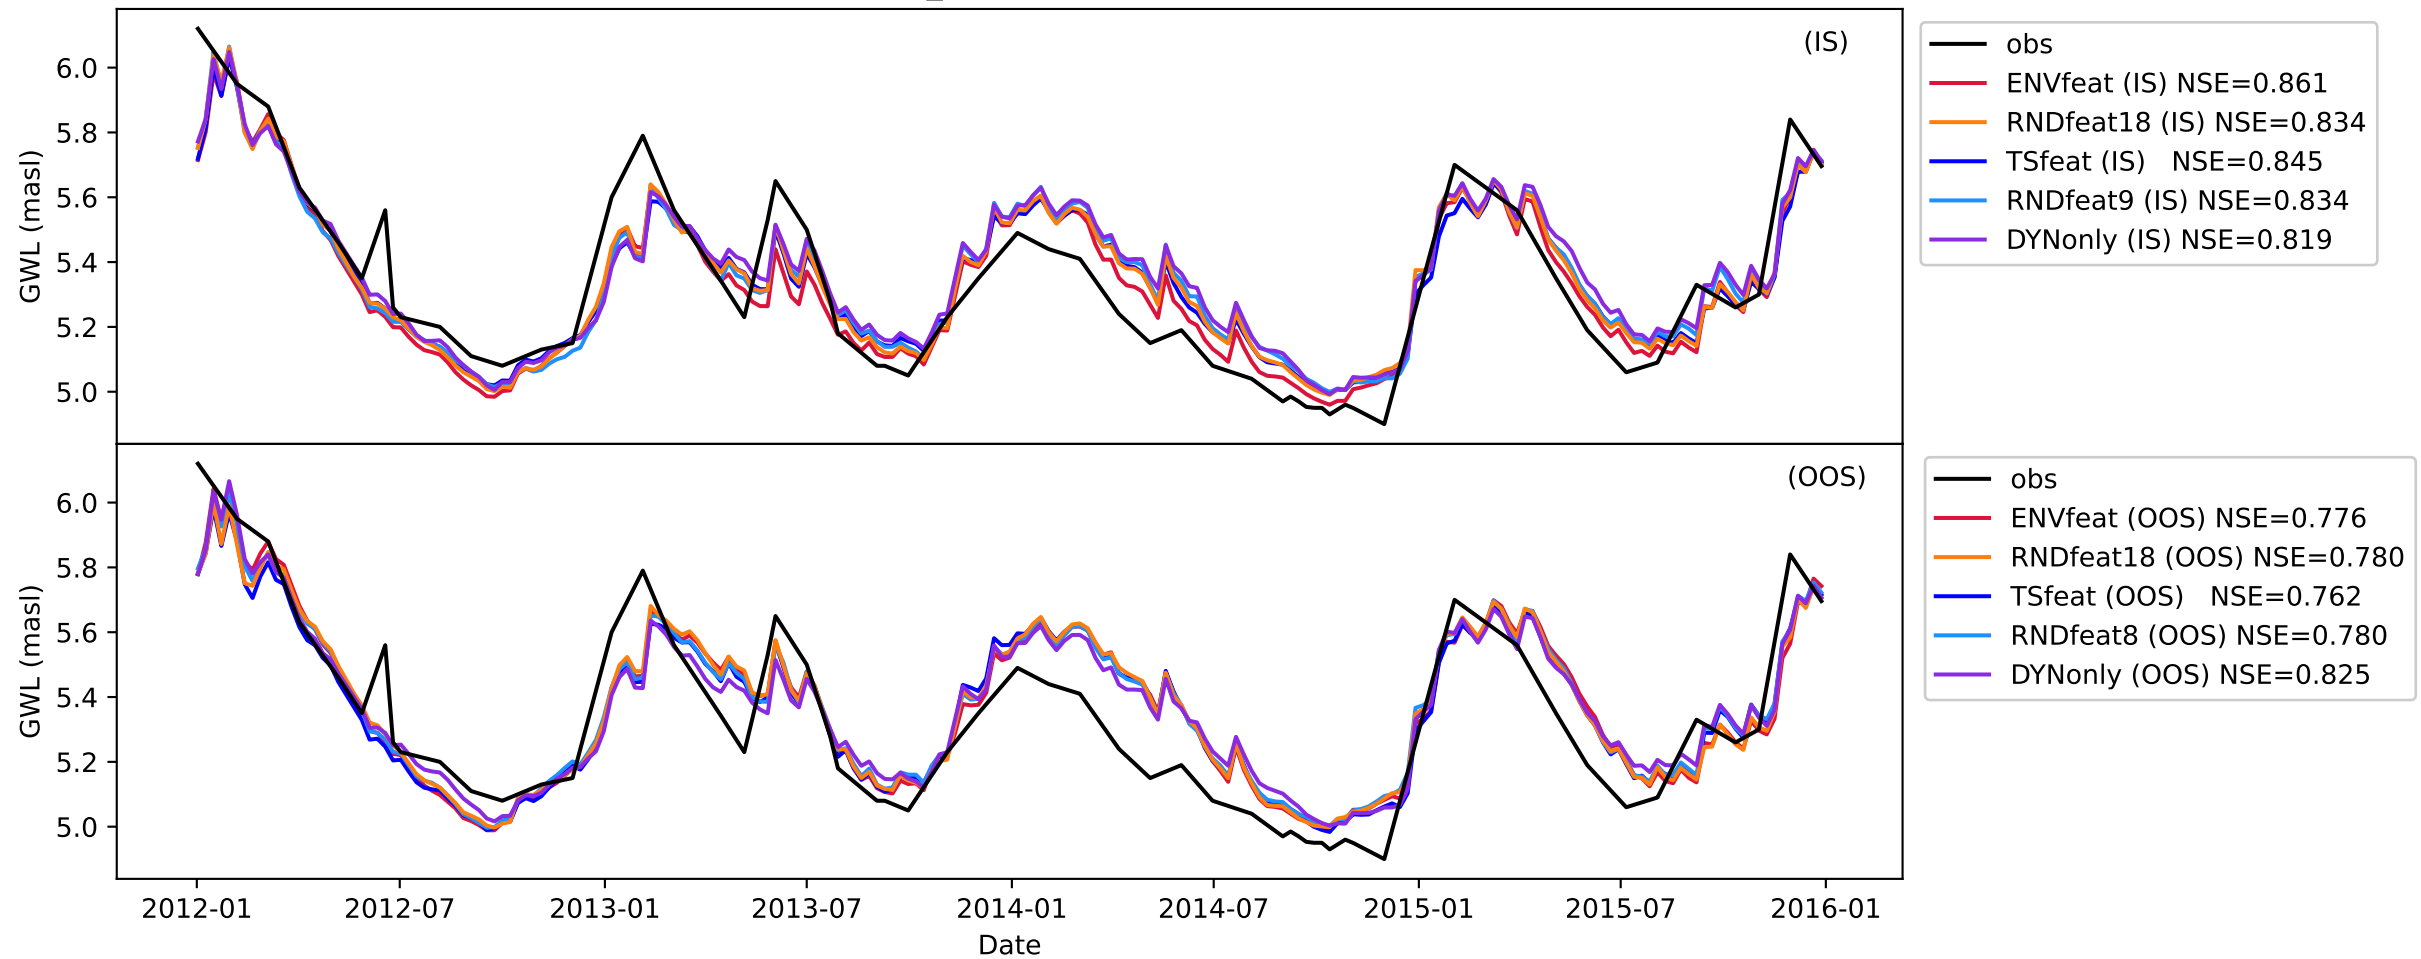

# NI\_405160331

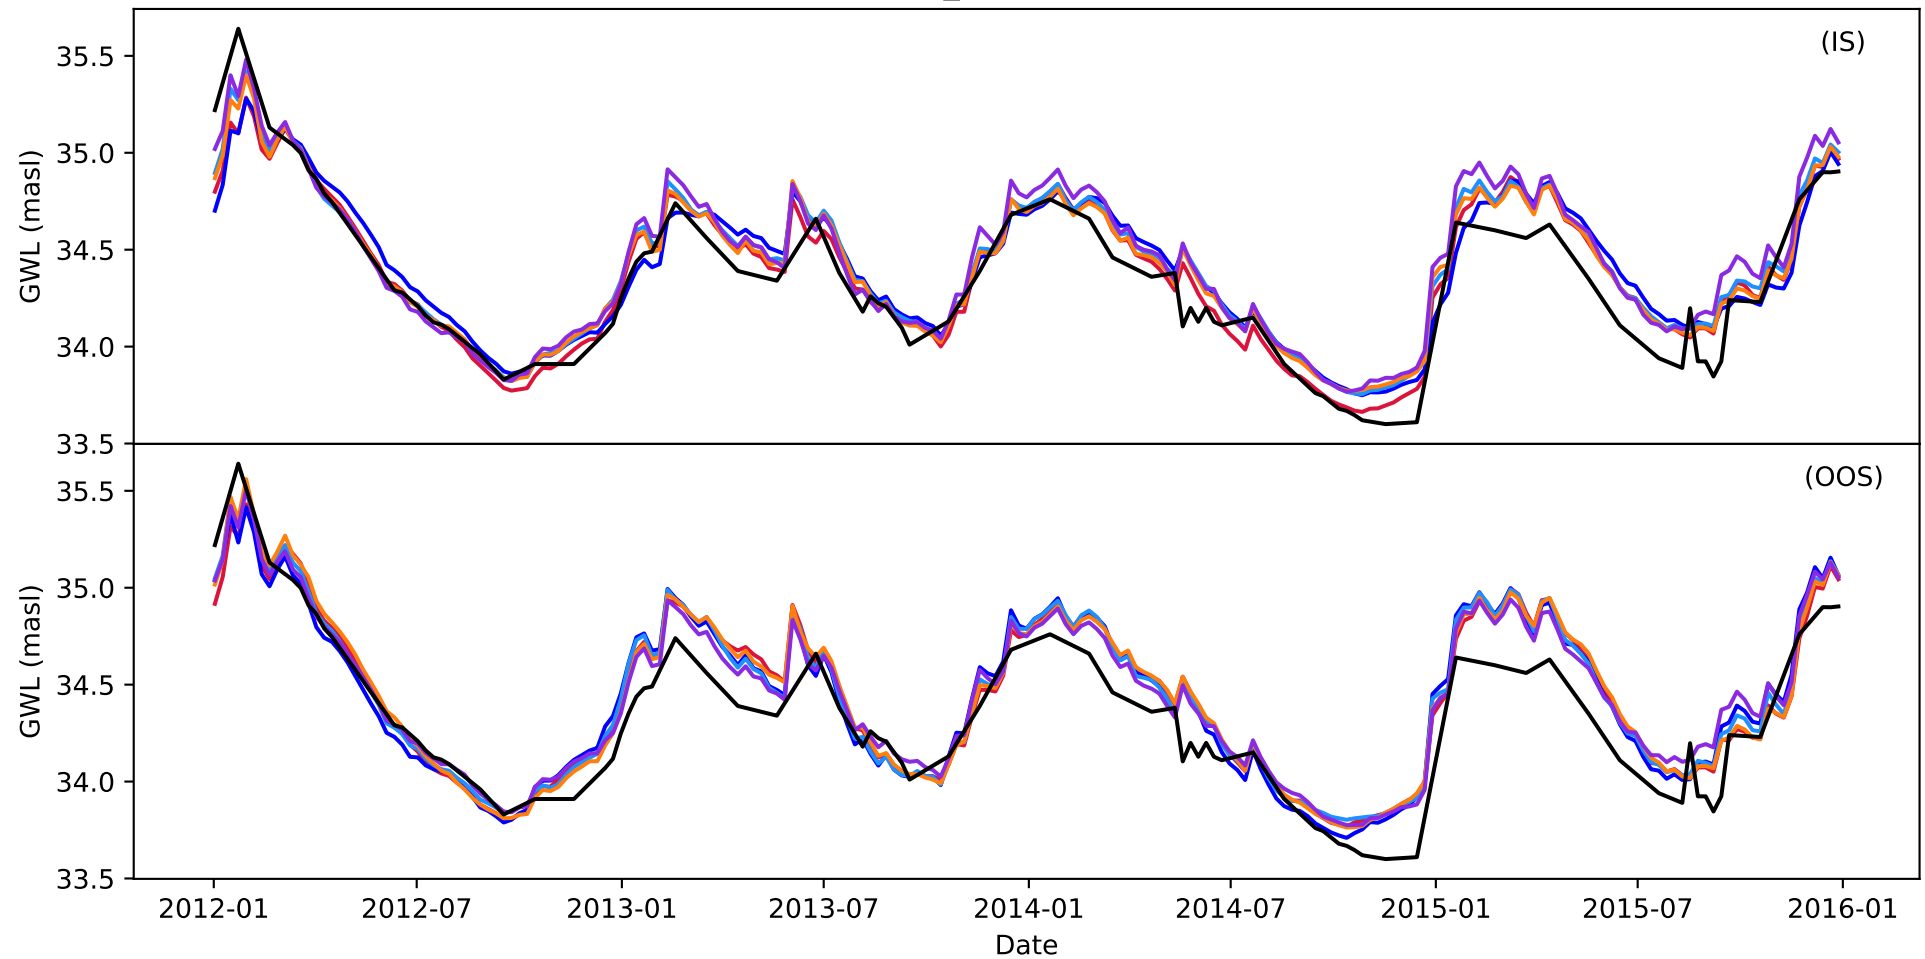

- obs
- ENVfeat (IS) NSE=0.919
- RNDfeat18 (IS) NSE=0.896
- TSfeat (IS) NSE=0.885
- RNDfeat9 (IS) NSE=0.896
- DYNOnly (IS) NSE=0.878

- obs
- ENVfeat (OOS) NSE=0.823
- RNDfeat18 (OOS) NSE=0.821
- TSfeat (OOS) NSE=0.832
- RNDfeat8 (OOS) NSE=0.821
- DYNOnly (OOS) NSE=0.883

NI\_500000592

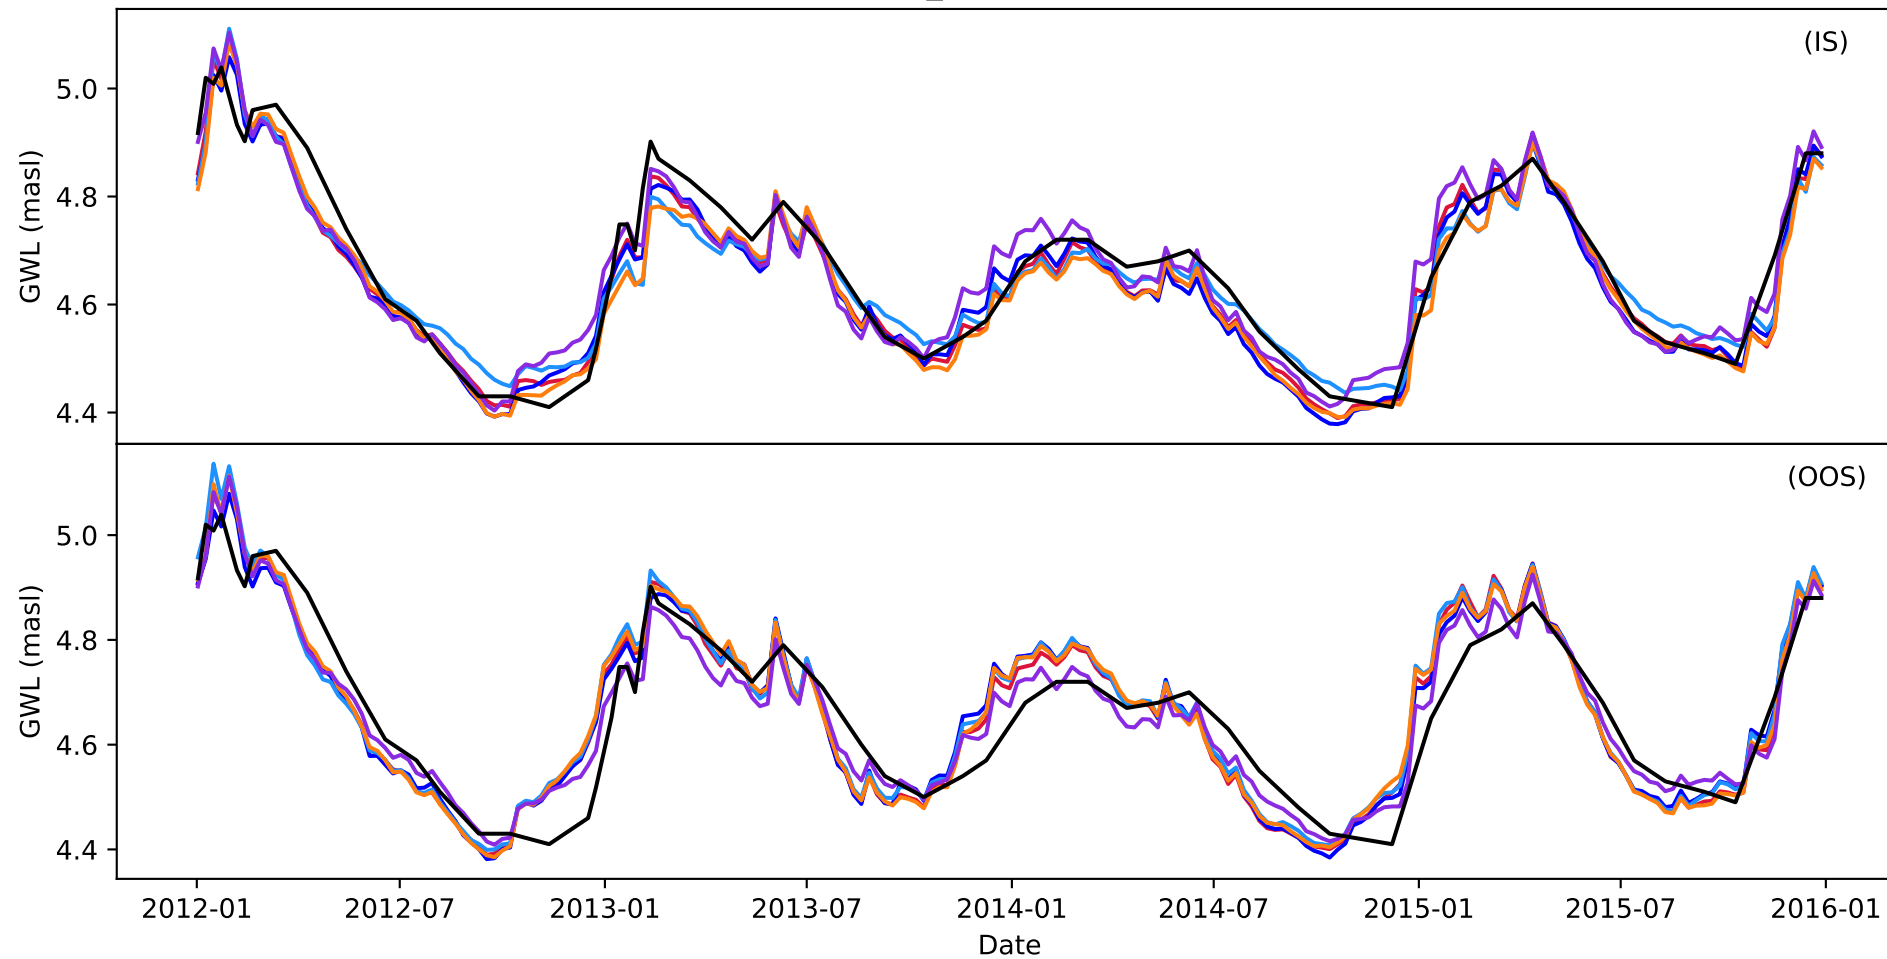

- obs
- ENVfeat (IS) NSE=0.939
- RNDfeat18 (IS) NSE=0.925
- TSfeat (IS) NSE=0.933
- RNDfeat9 (IS) NSE=0.925
- DYNonly (IS) NSE=0.923

- obs
- ENVfeat (OOS) NSE=0.873
- RNDfeat18 (OOS) NSE=0.851
- TSfeat (OOS) NSE=0.867
- RNDfeat8 (OOS) NSE=0.851
- DYNonly (OOS) NSE=0.924

NI\_600041871

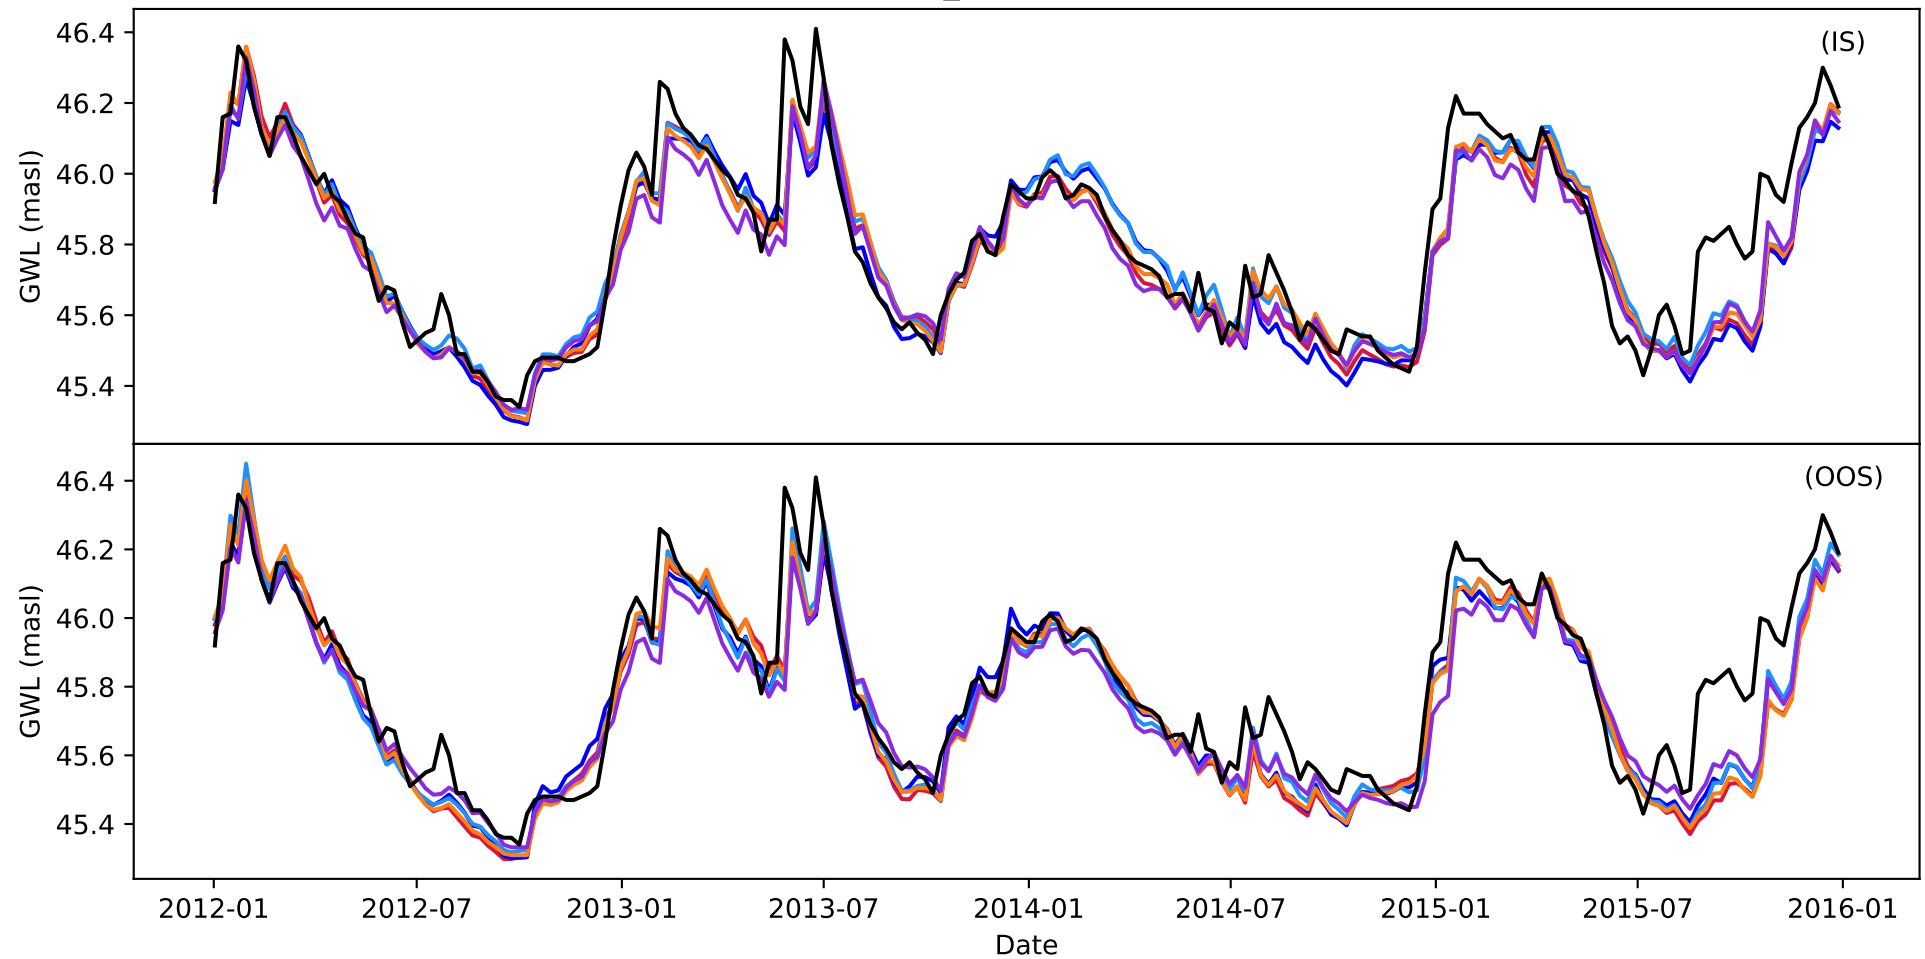

- obs
- ENVfeat (IS) NSE=0.828
- RNDfeat18 (IS) NSE=0.836
- TSfeat (IS) NSE=0.808
- RNDfeat9 (IS) NSE=0.836
- DYNSonly (IS) NSE=0.818

- obs
- ENVfeat (OOS) NSE=0.772
- RNDfeat18 (OOS) NSE=0.794
- TSfeat (OOS) NSE=0.792
- RNDfeat8 (OOS) NSE=0.794
- DYNSonly (OOS) NSE=0.797



NW\_60090169

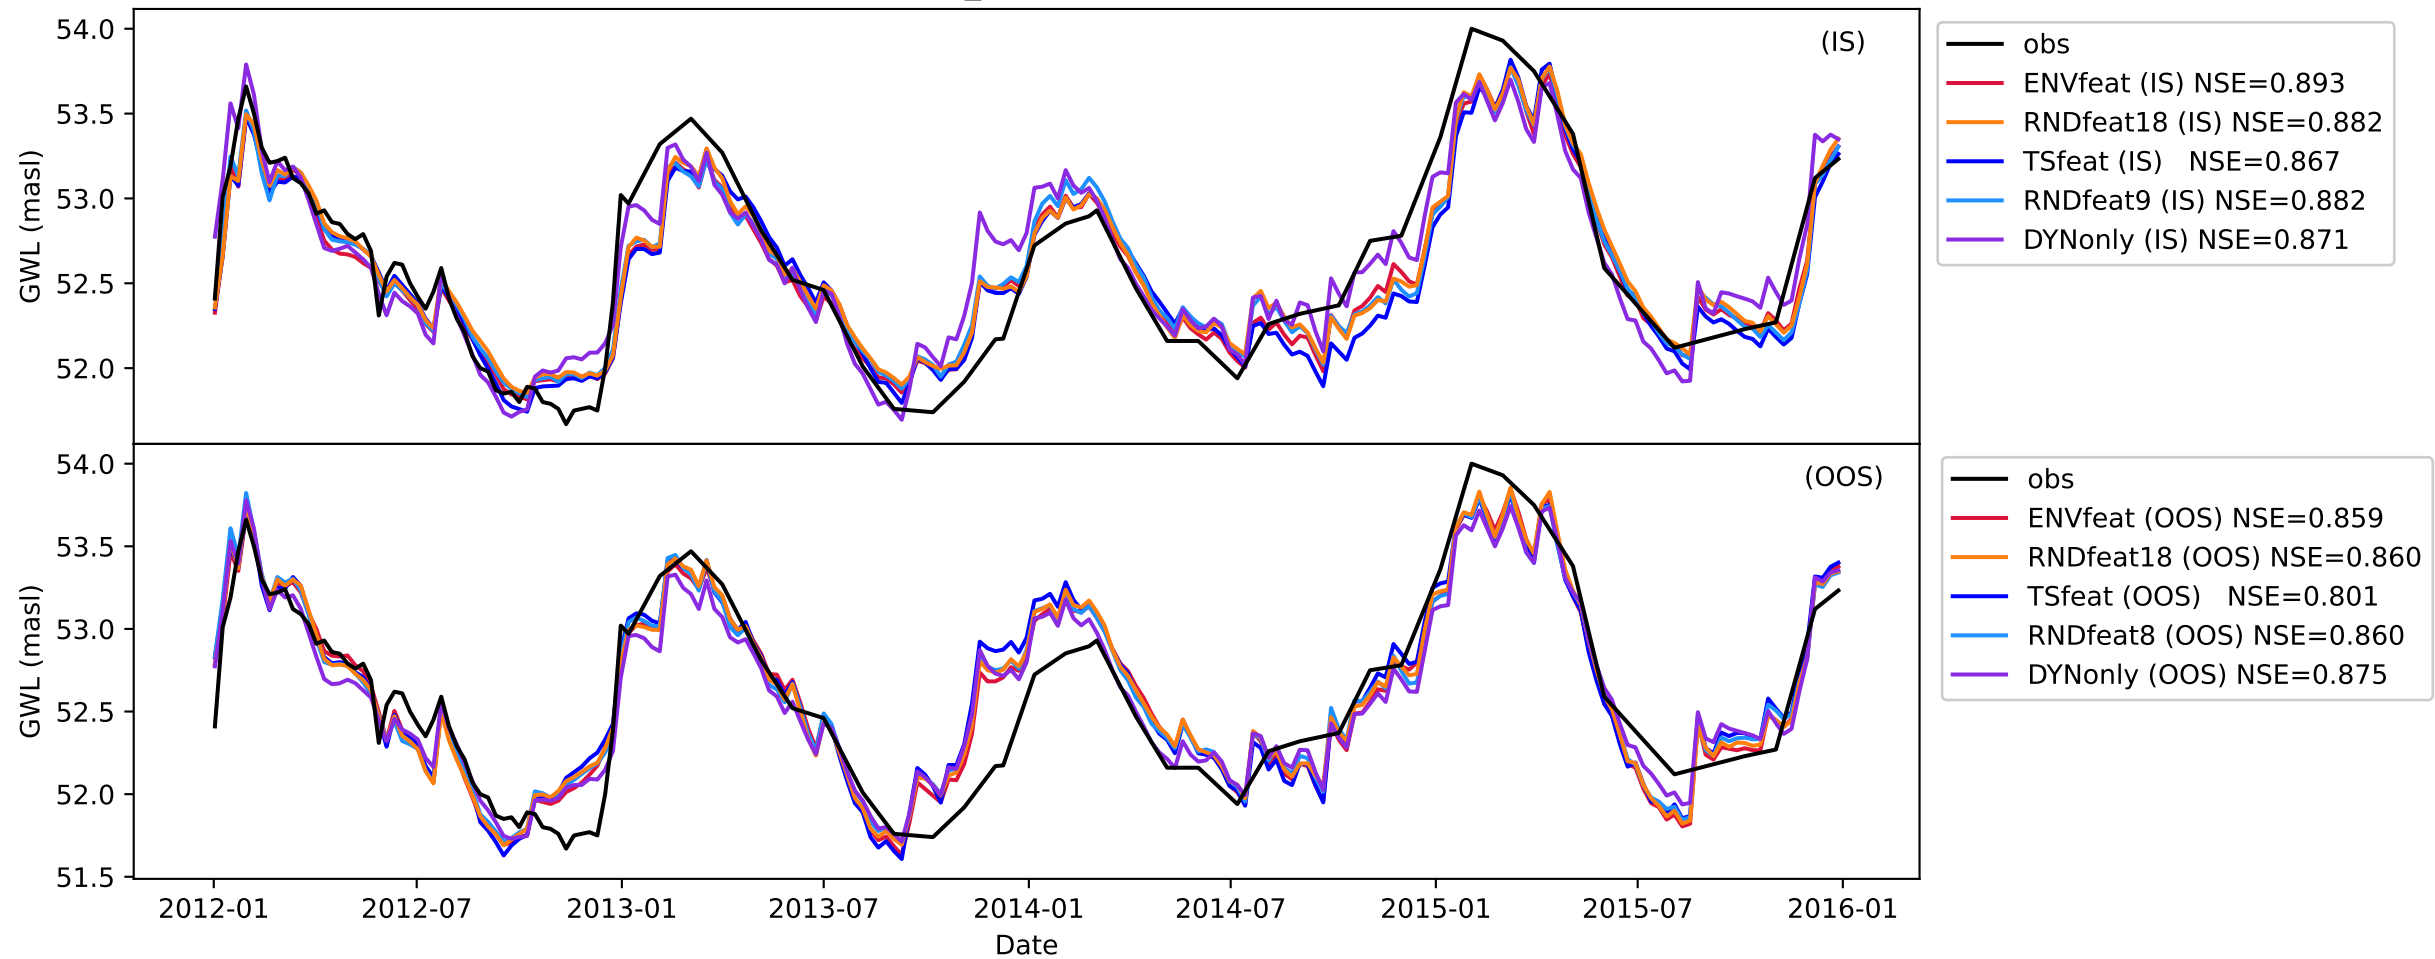

NW\_60240258

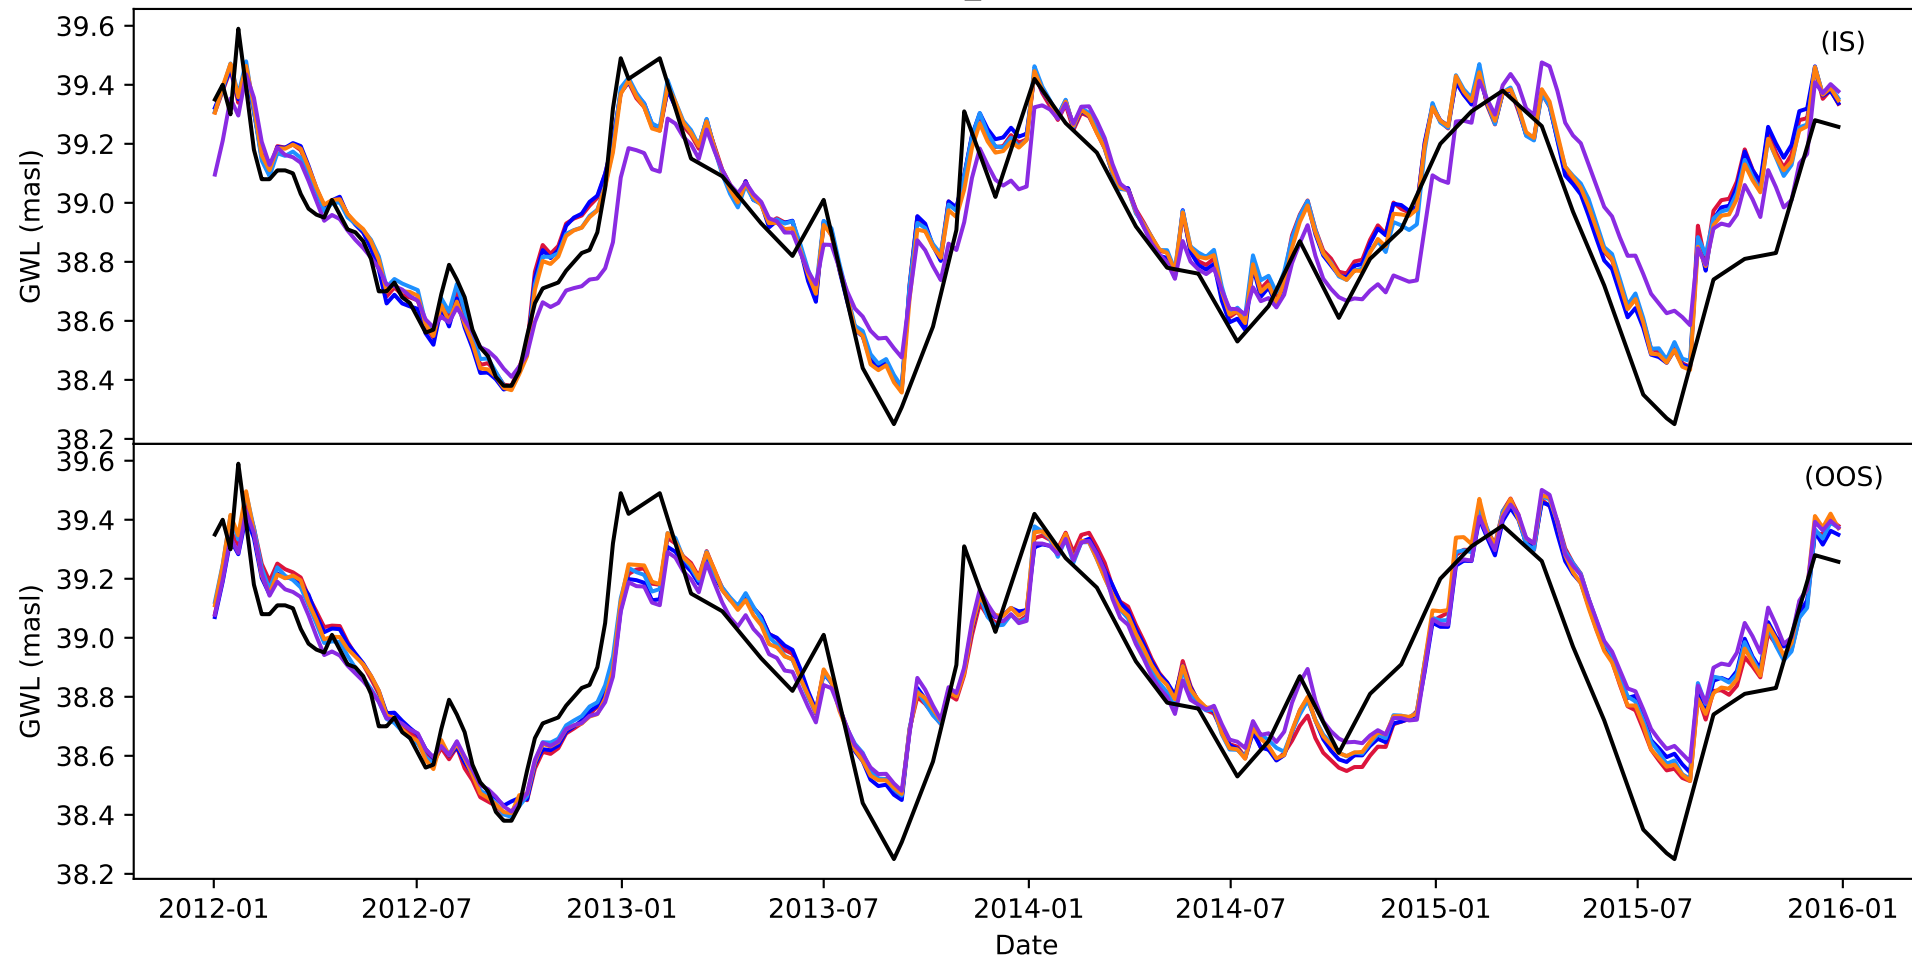

- obs
- ENVfeat (IS) NSE=0.810
- RNDfeat18 (IS) NSE=0.827
- TSfeat (IS) NSE=0.815
- RNDfeat9 (IS) NSE=0.827
- DYNSonly (IS) NSE=0.734

- obs
- ENVfeat (OOS) NSE=0.756
- RNDfeat18 (OOS) NSE=0.760
- TSfeat (OOS) NSE=0.738
- RNDfeat8 (OOS) NSE=0.760
- DYNSonly (OOS) NSE=0.731

NW\_8000186

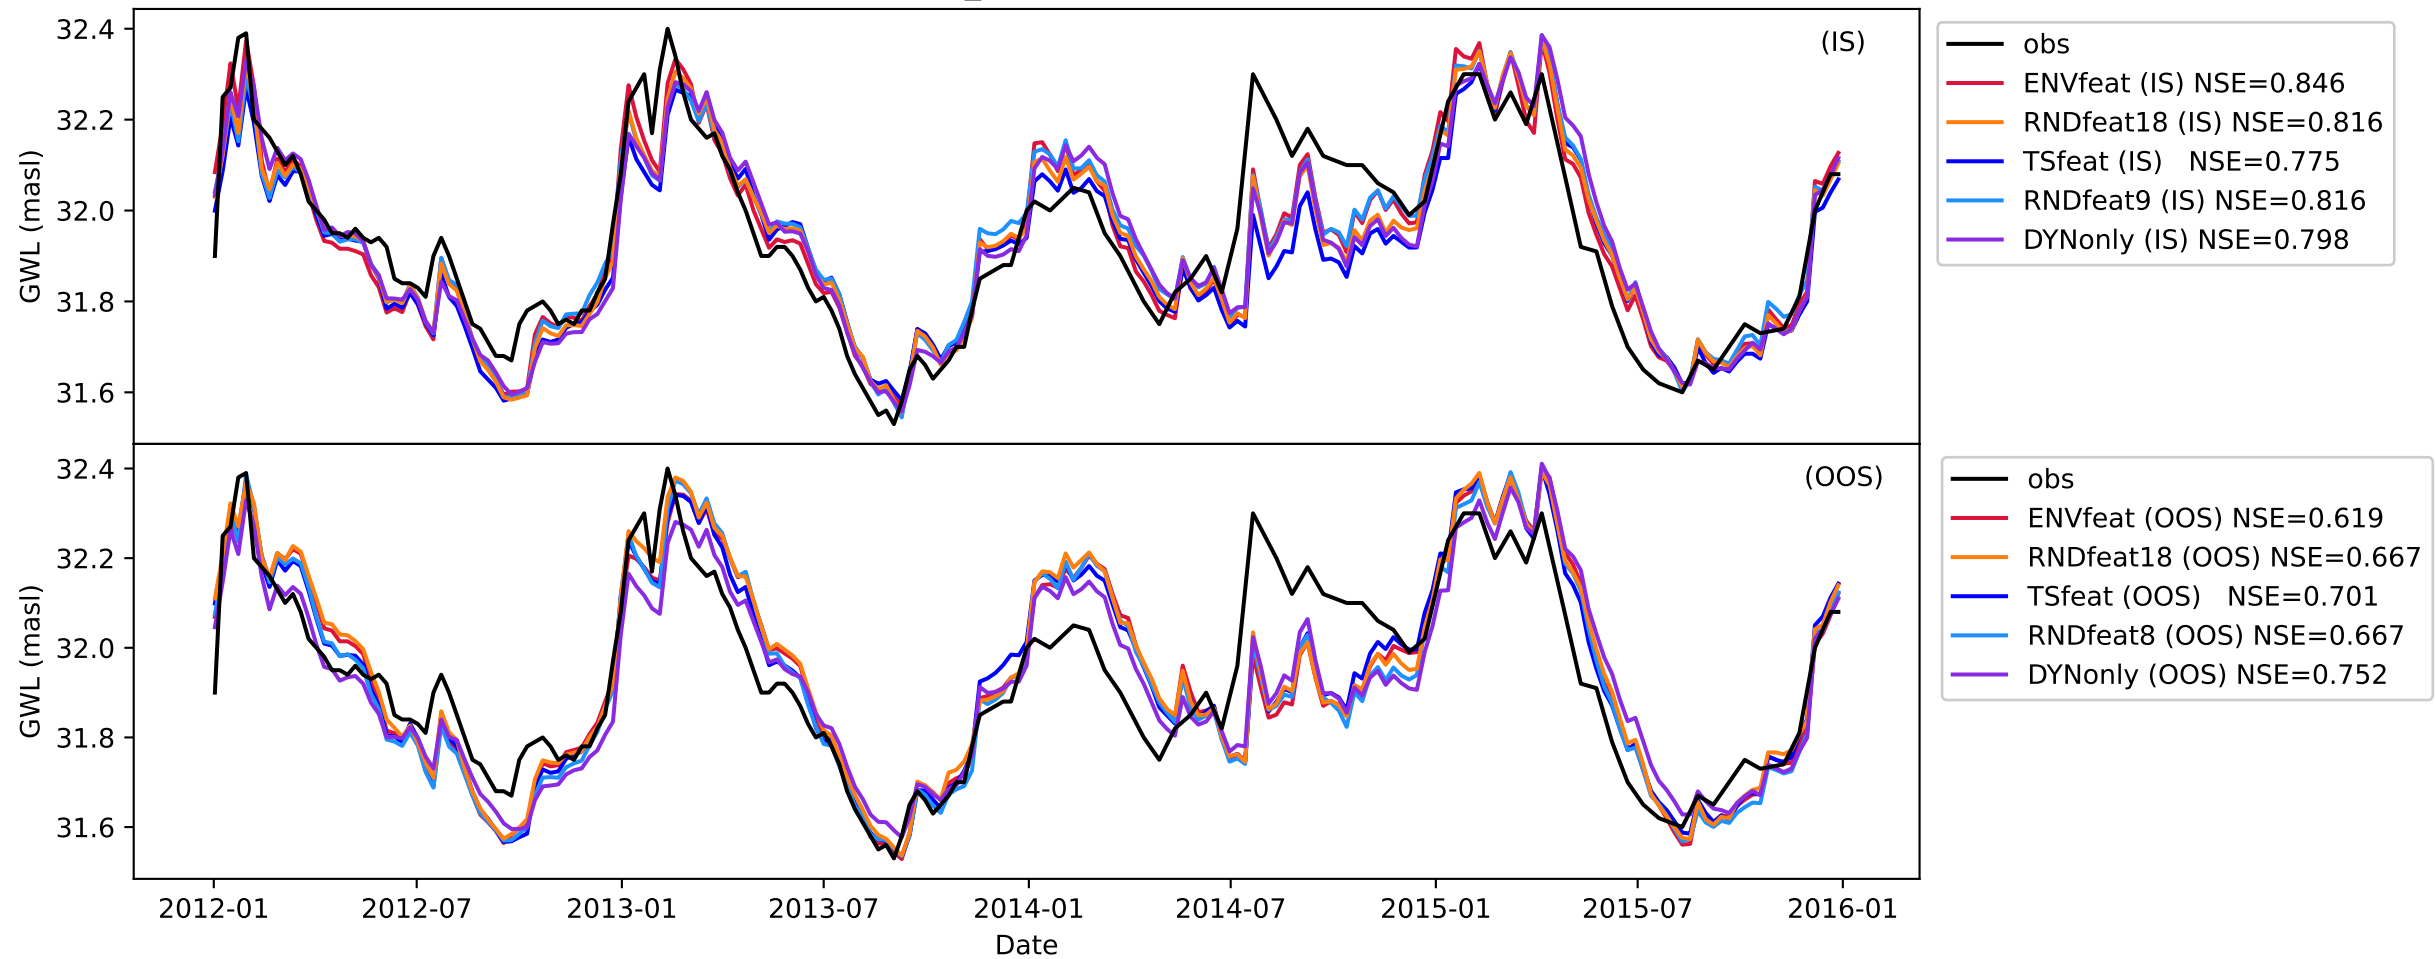

NW\_80300376

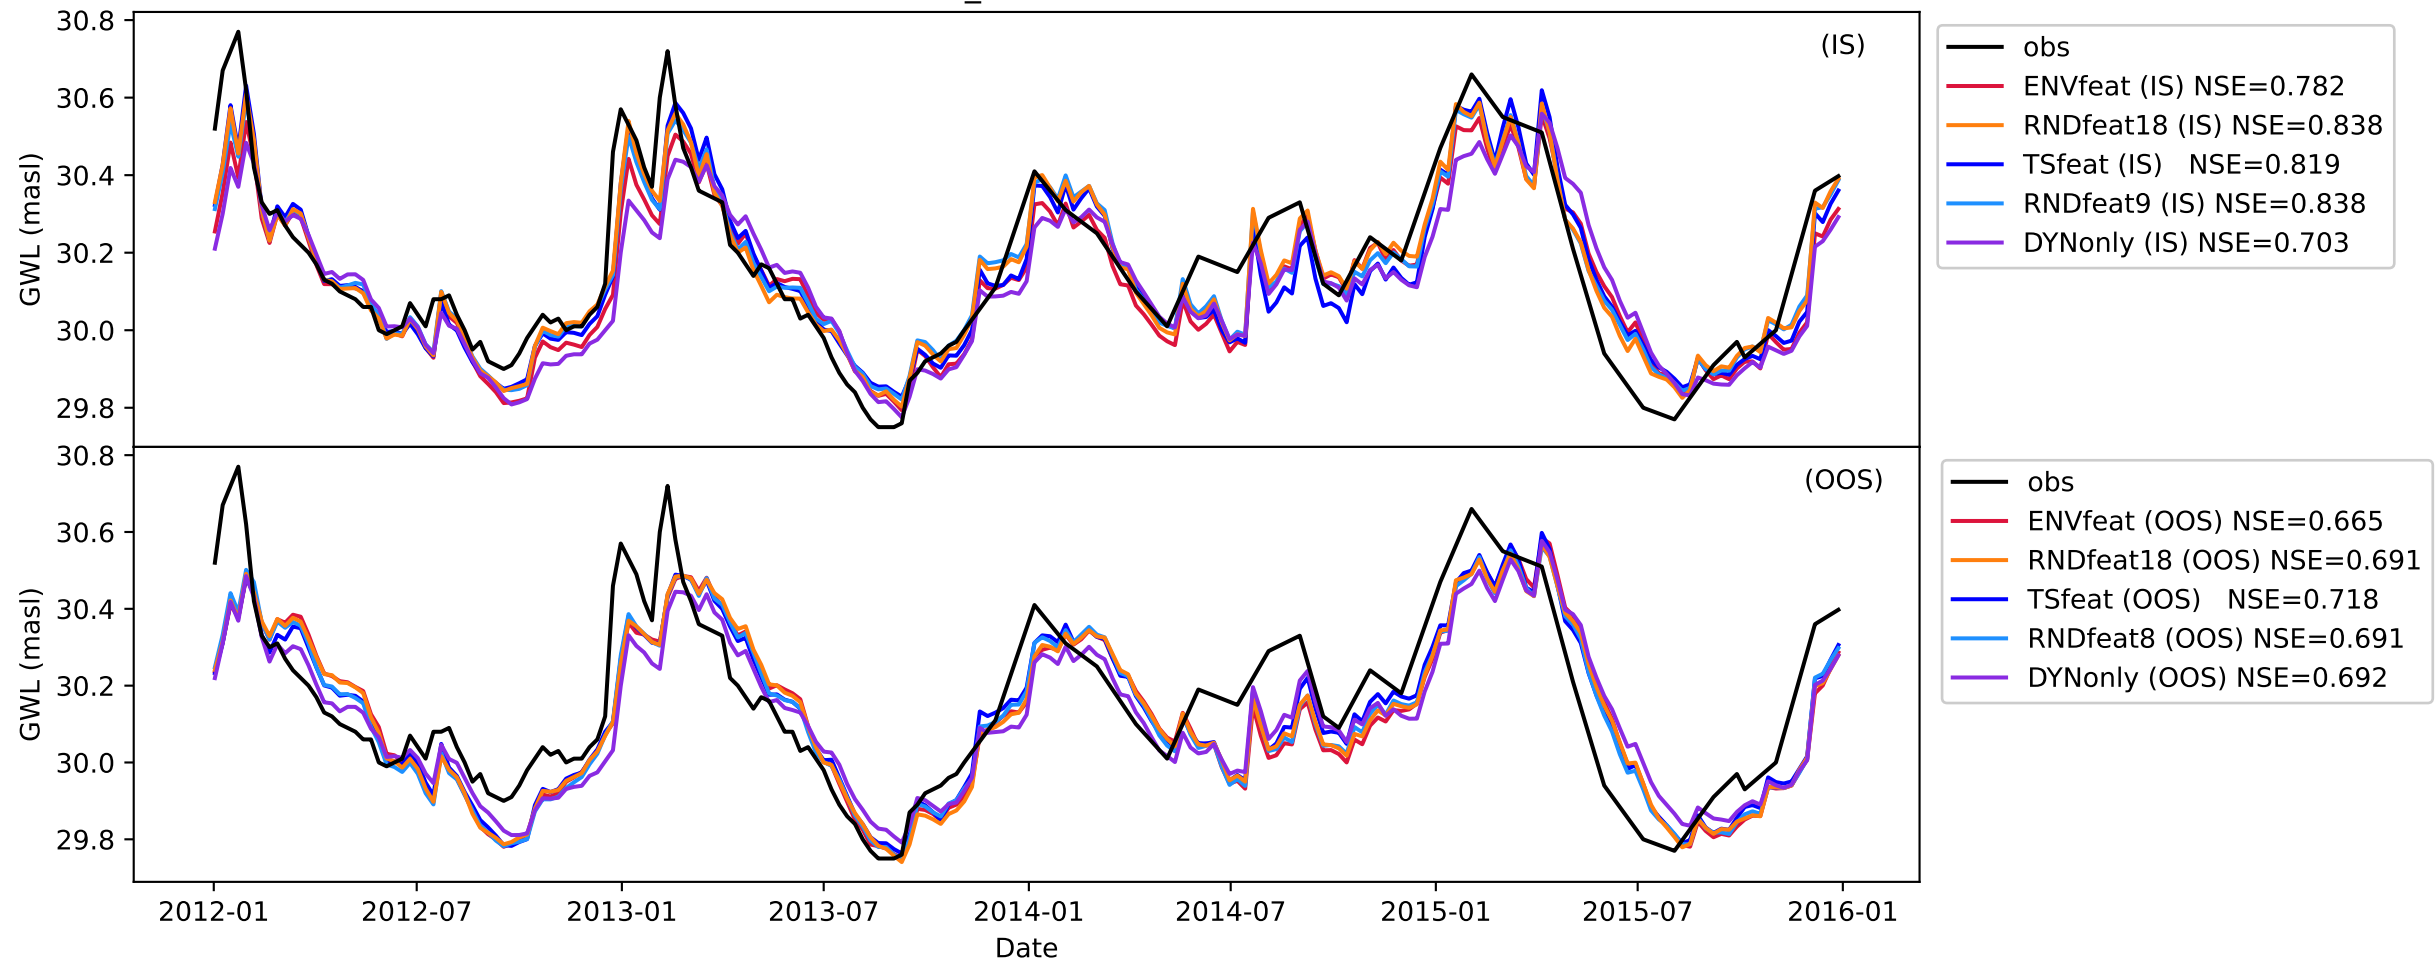

NW\_91163705

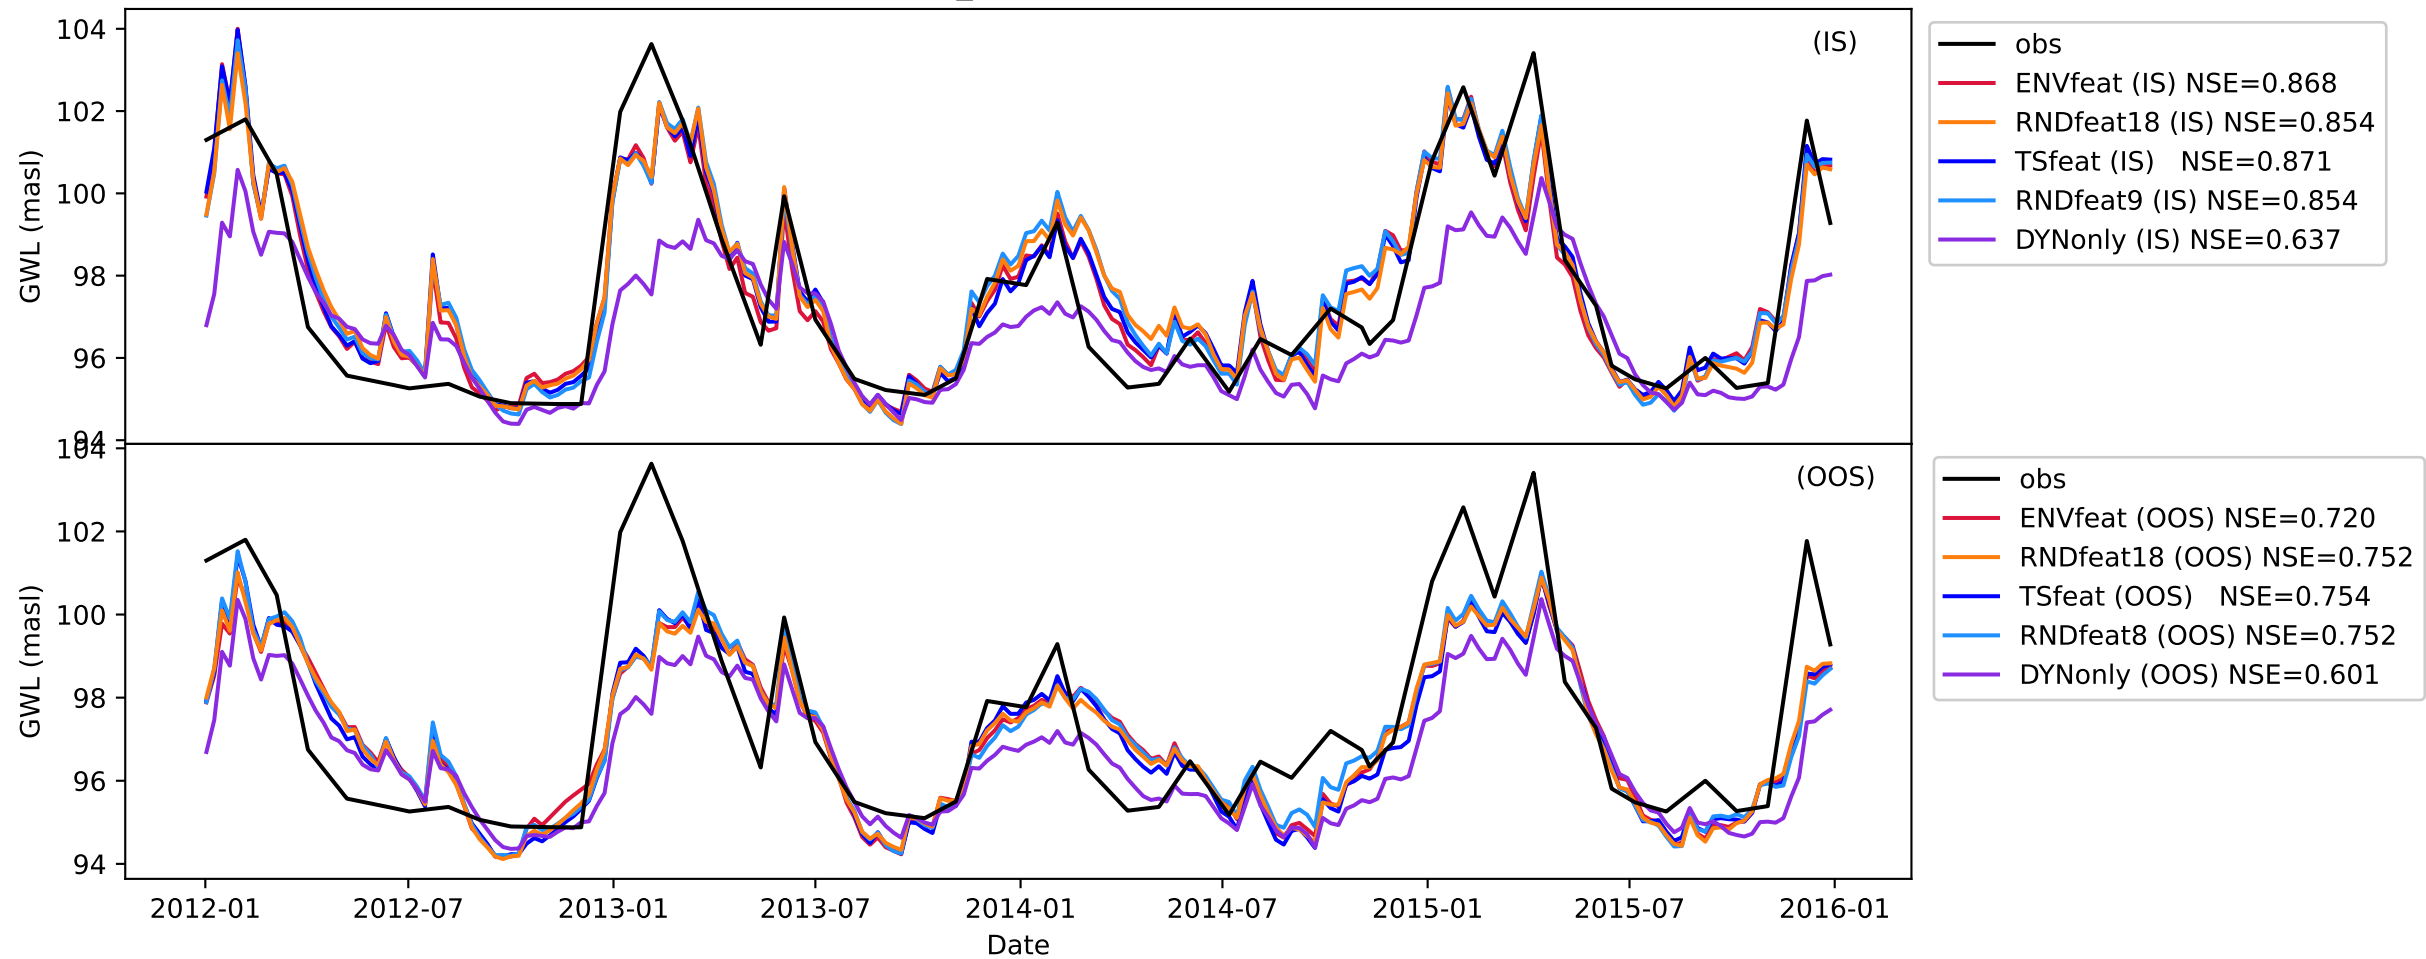

NW\_91174909

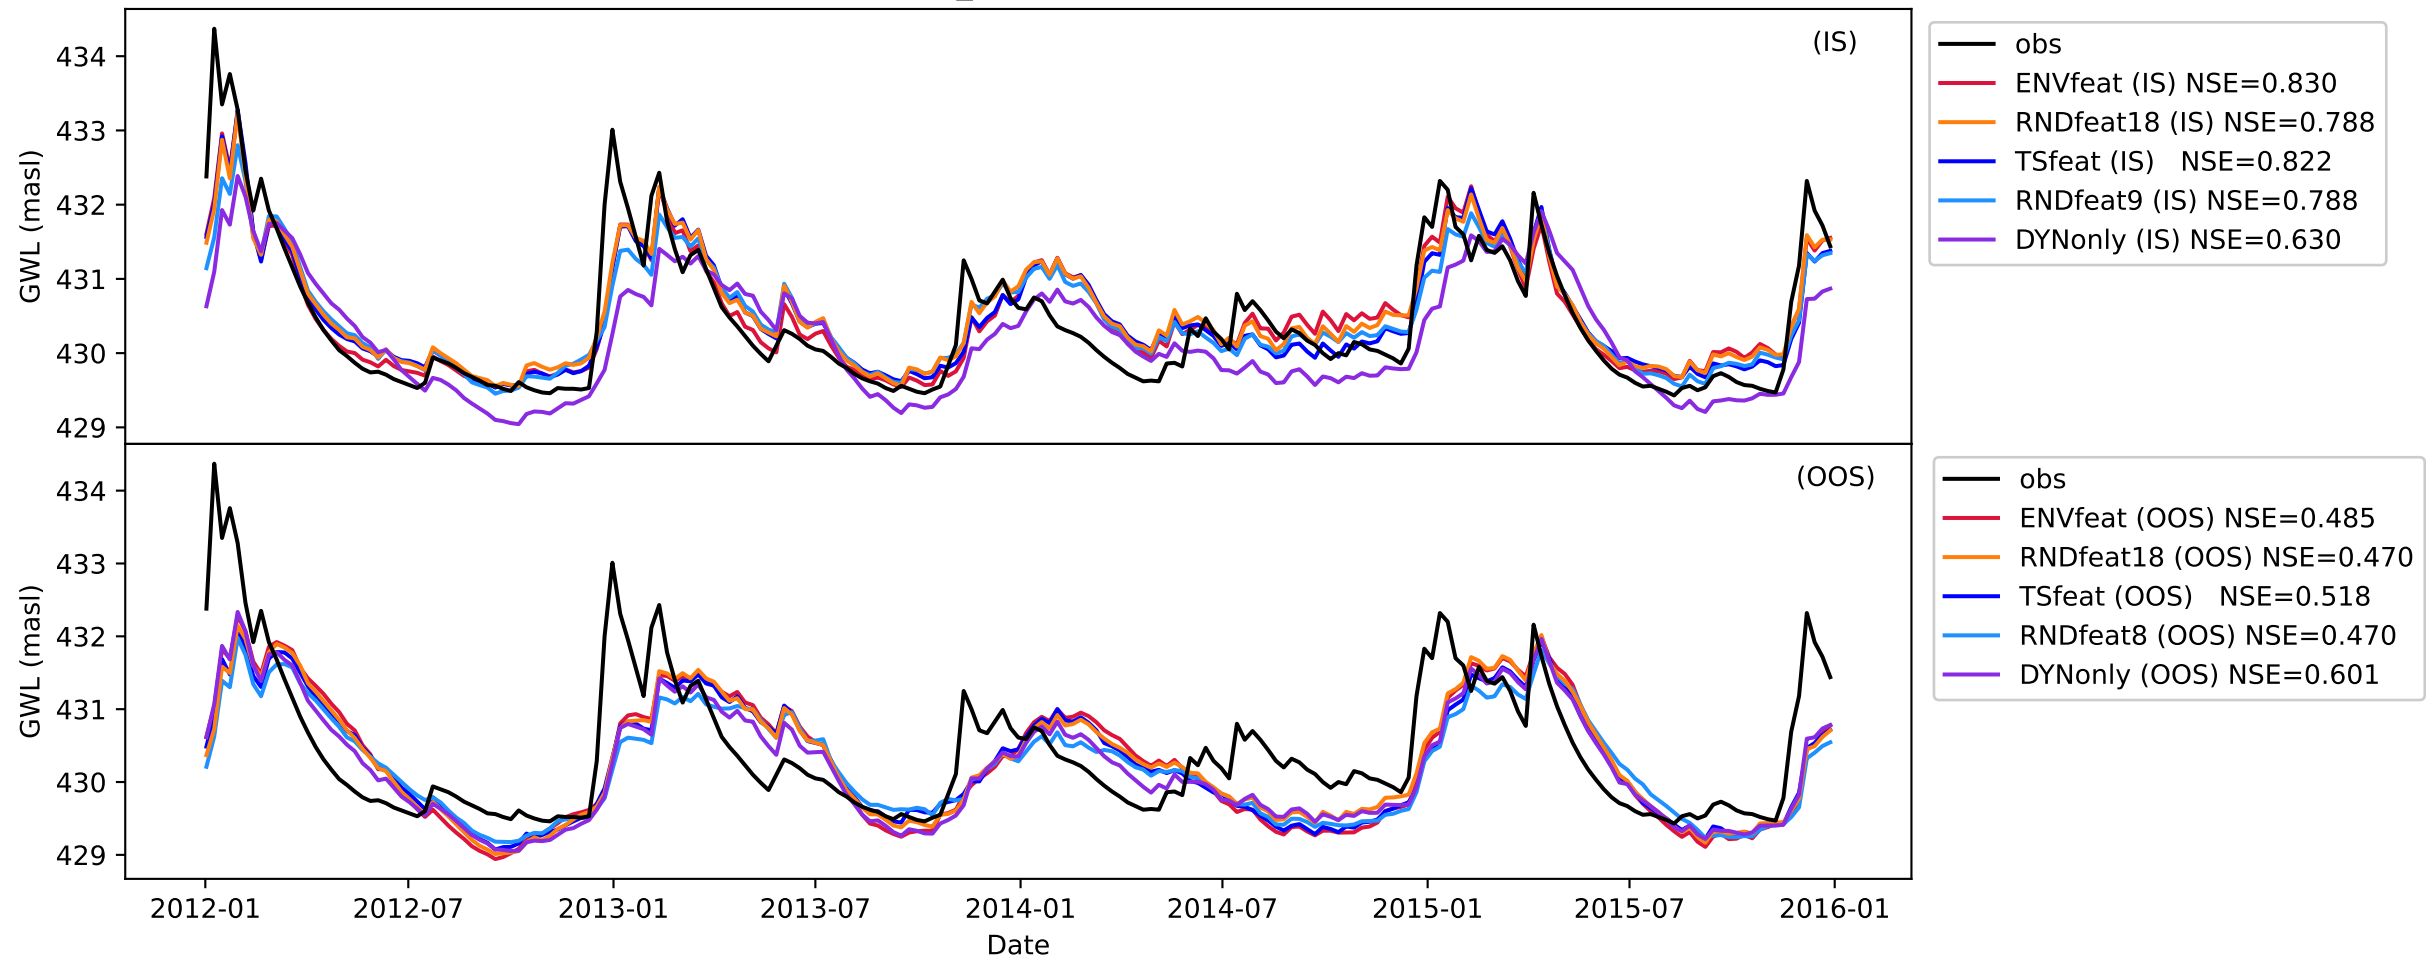

NW\_100140142

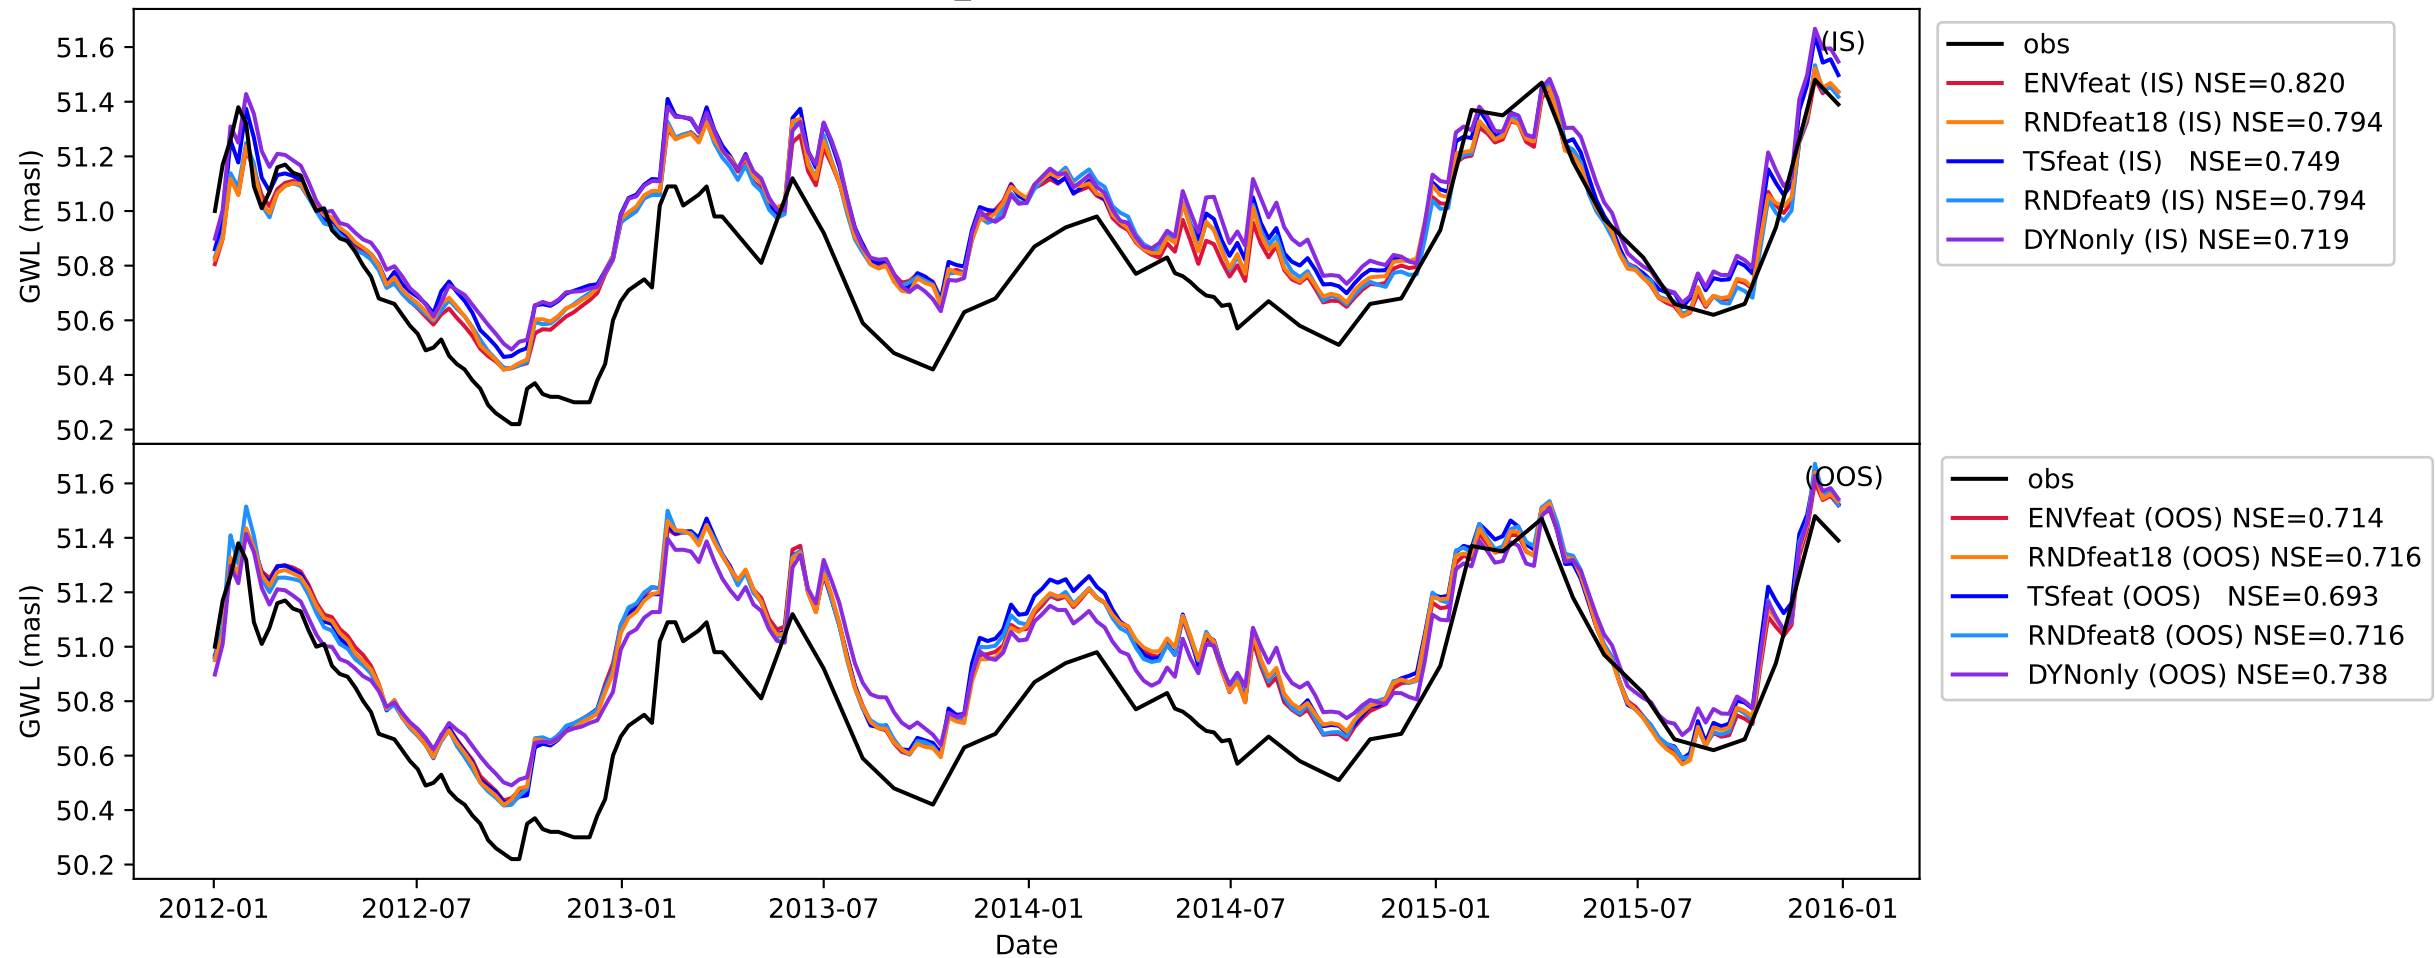

NW\_100140762

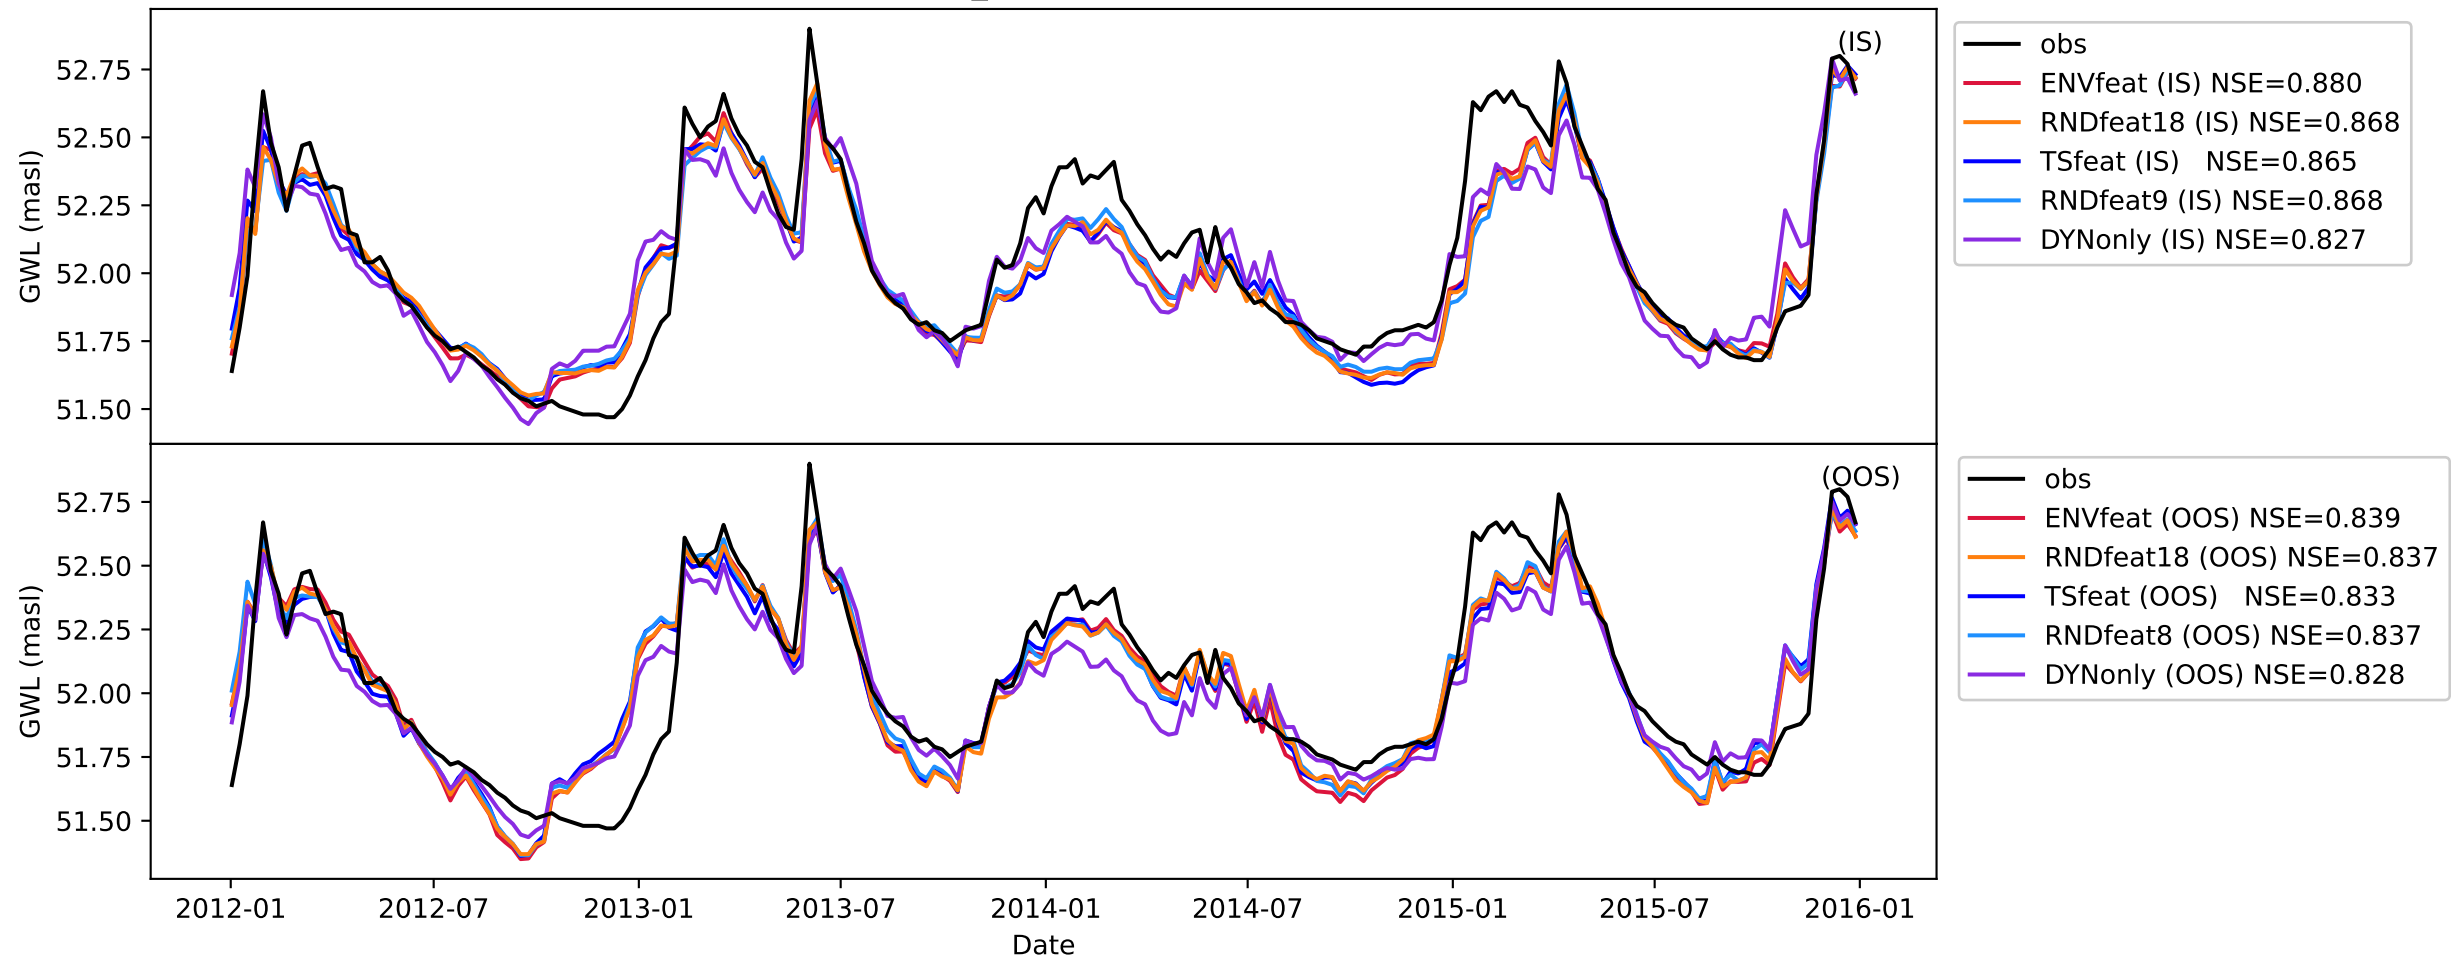



NW\_110040028

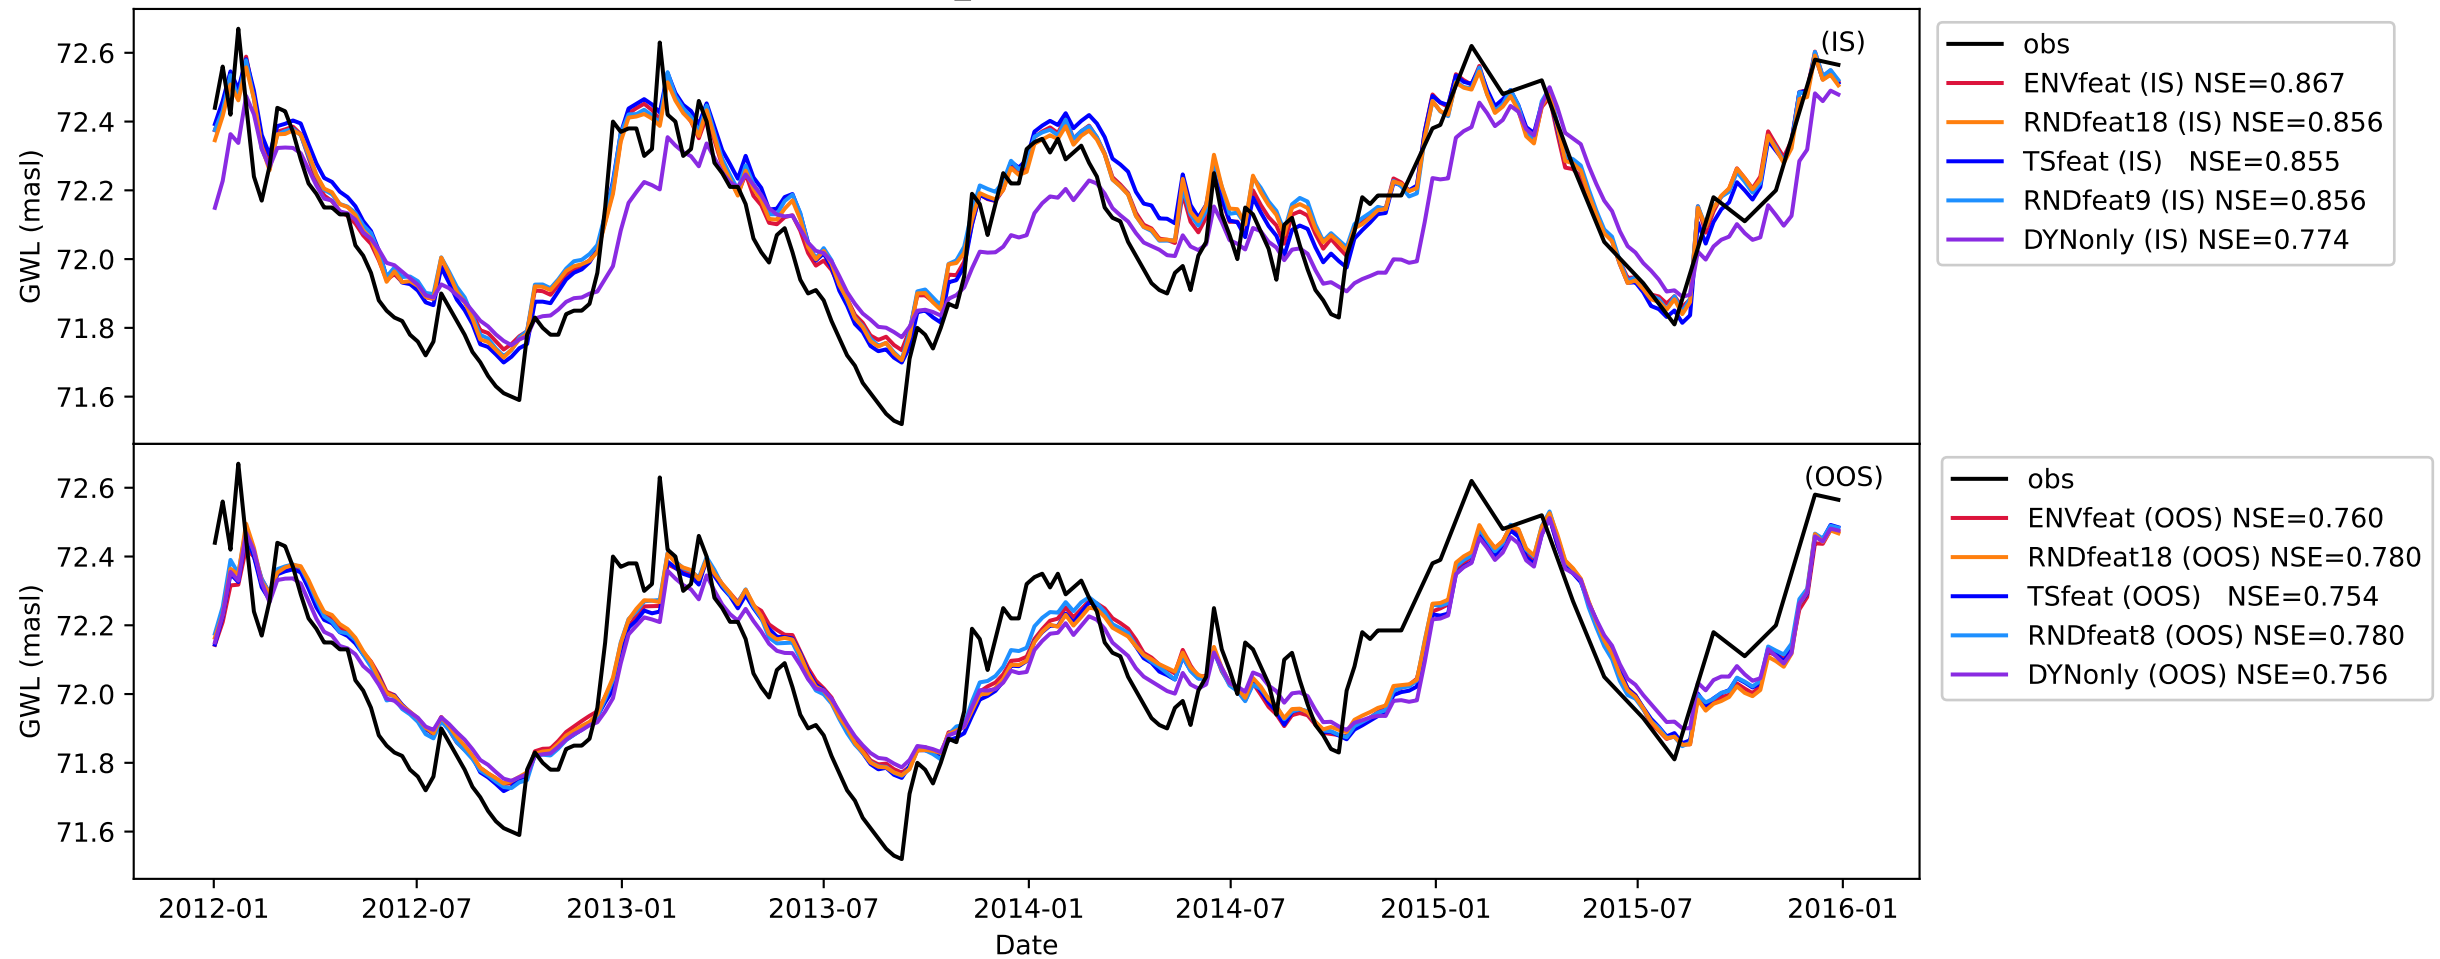

NW\_110040041

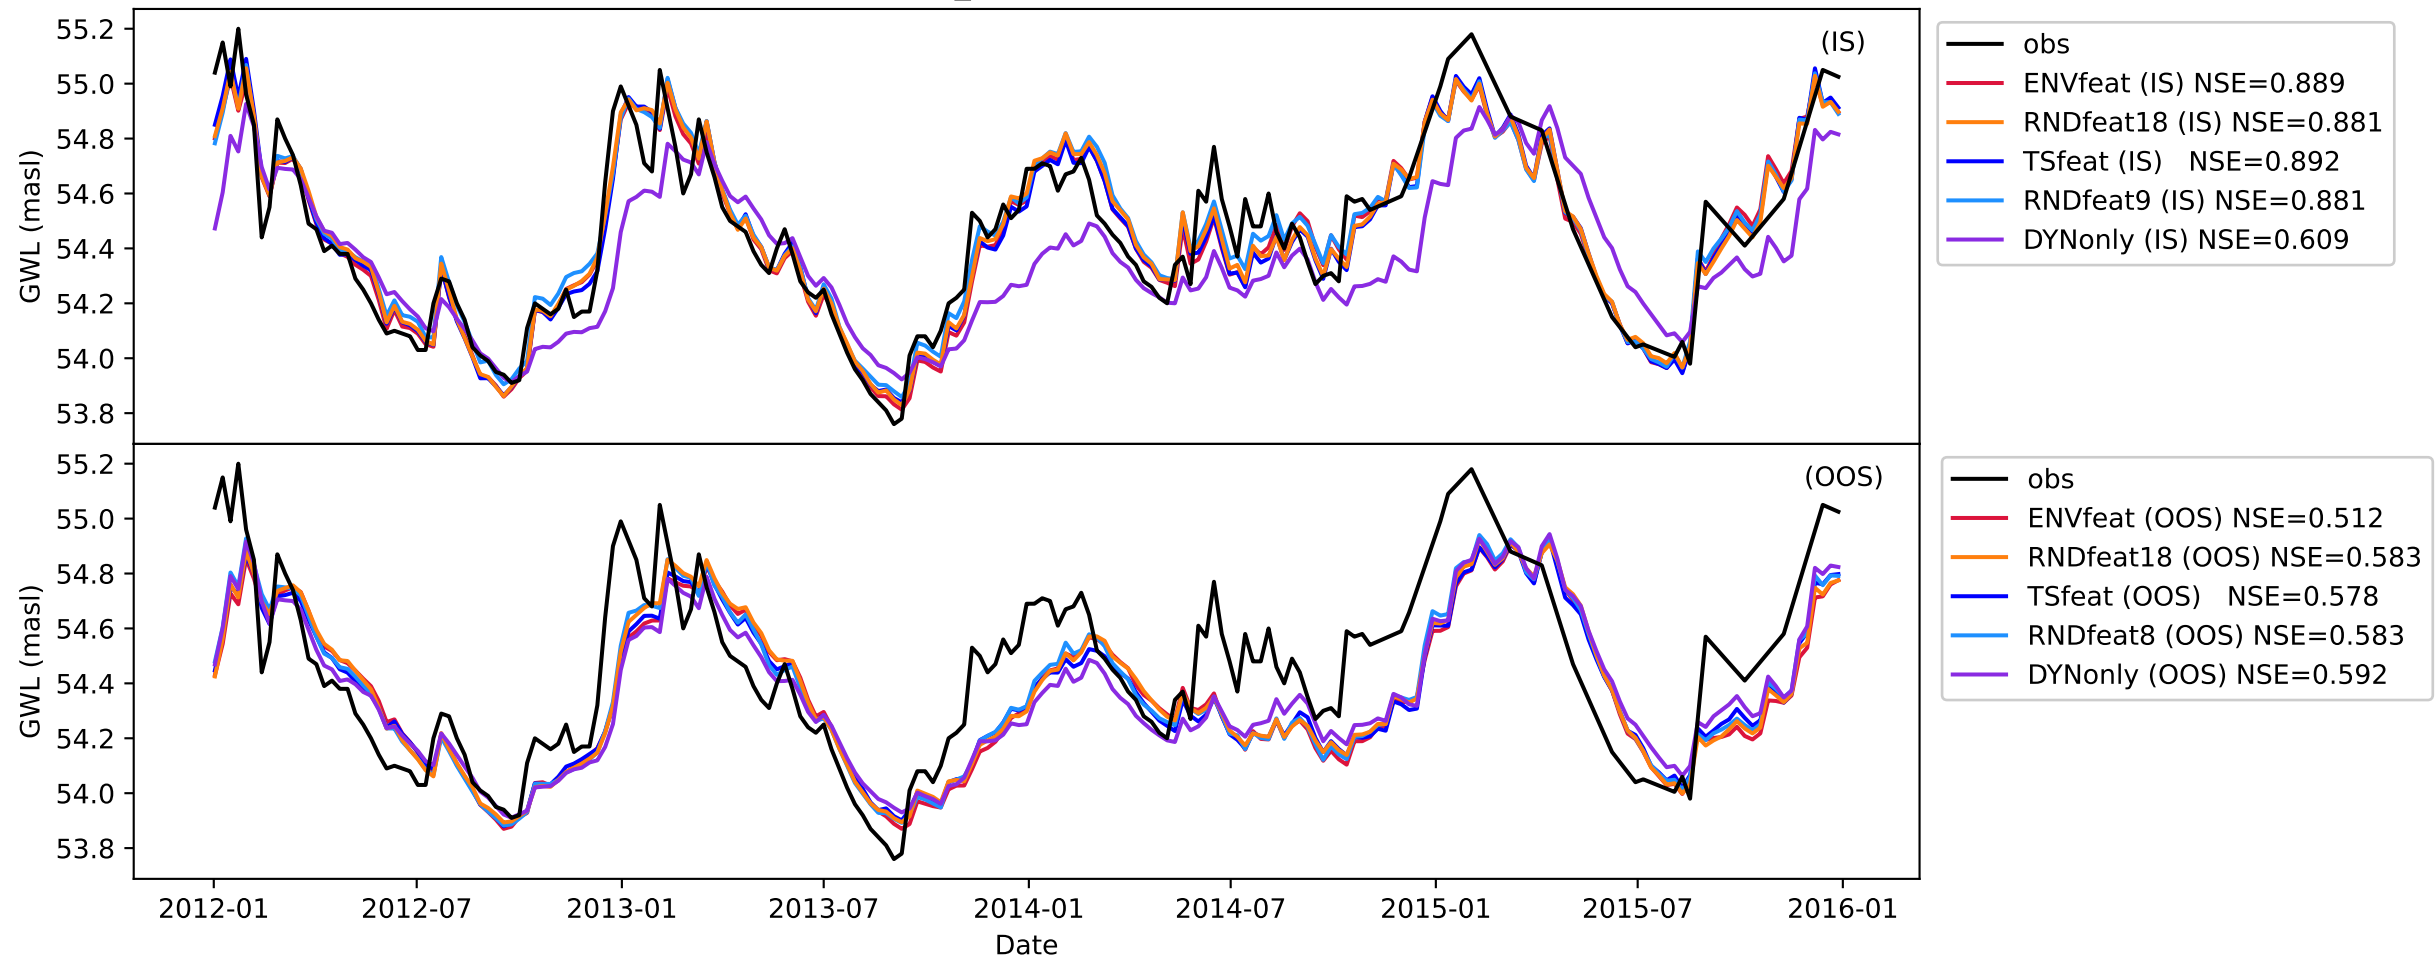

NW\_110060143

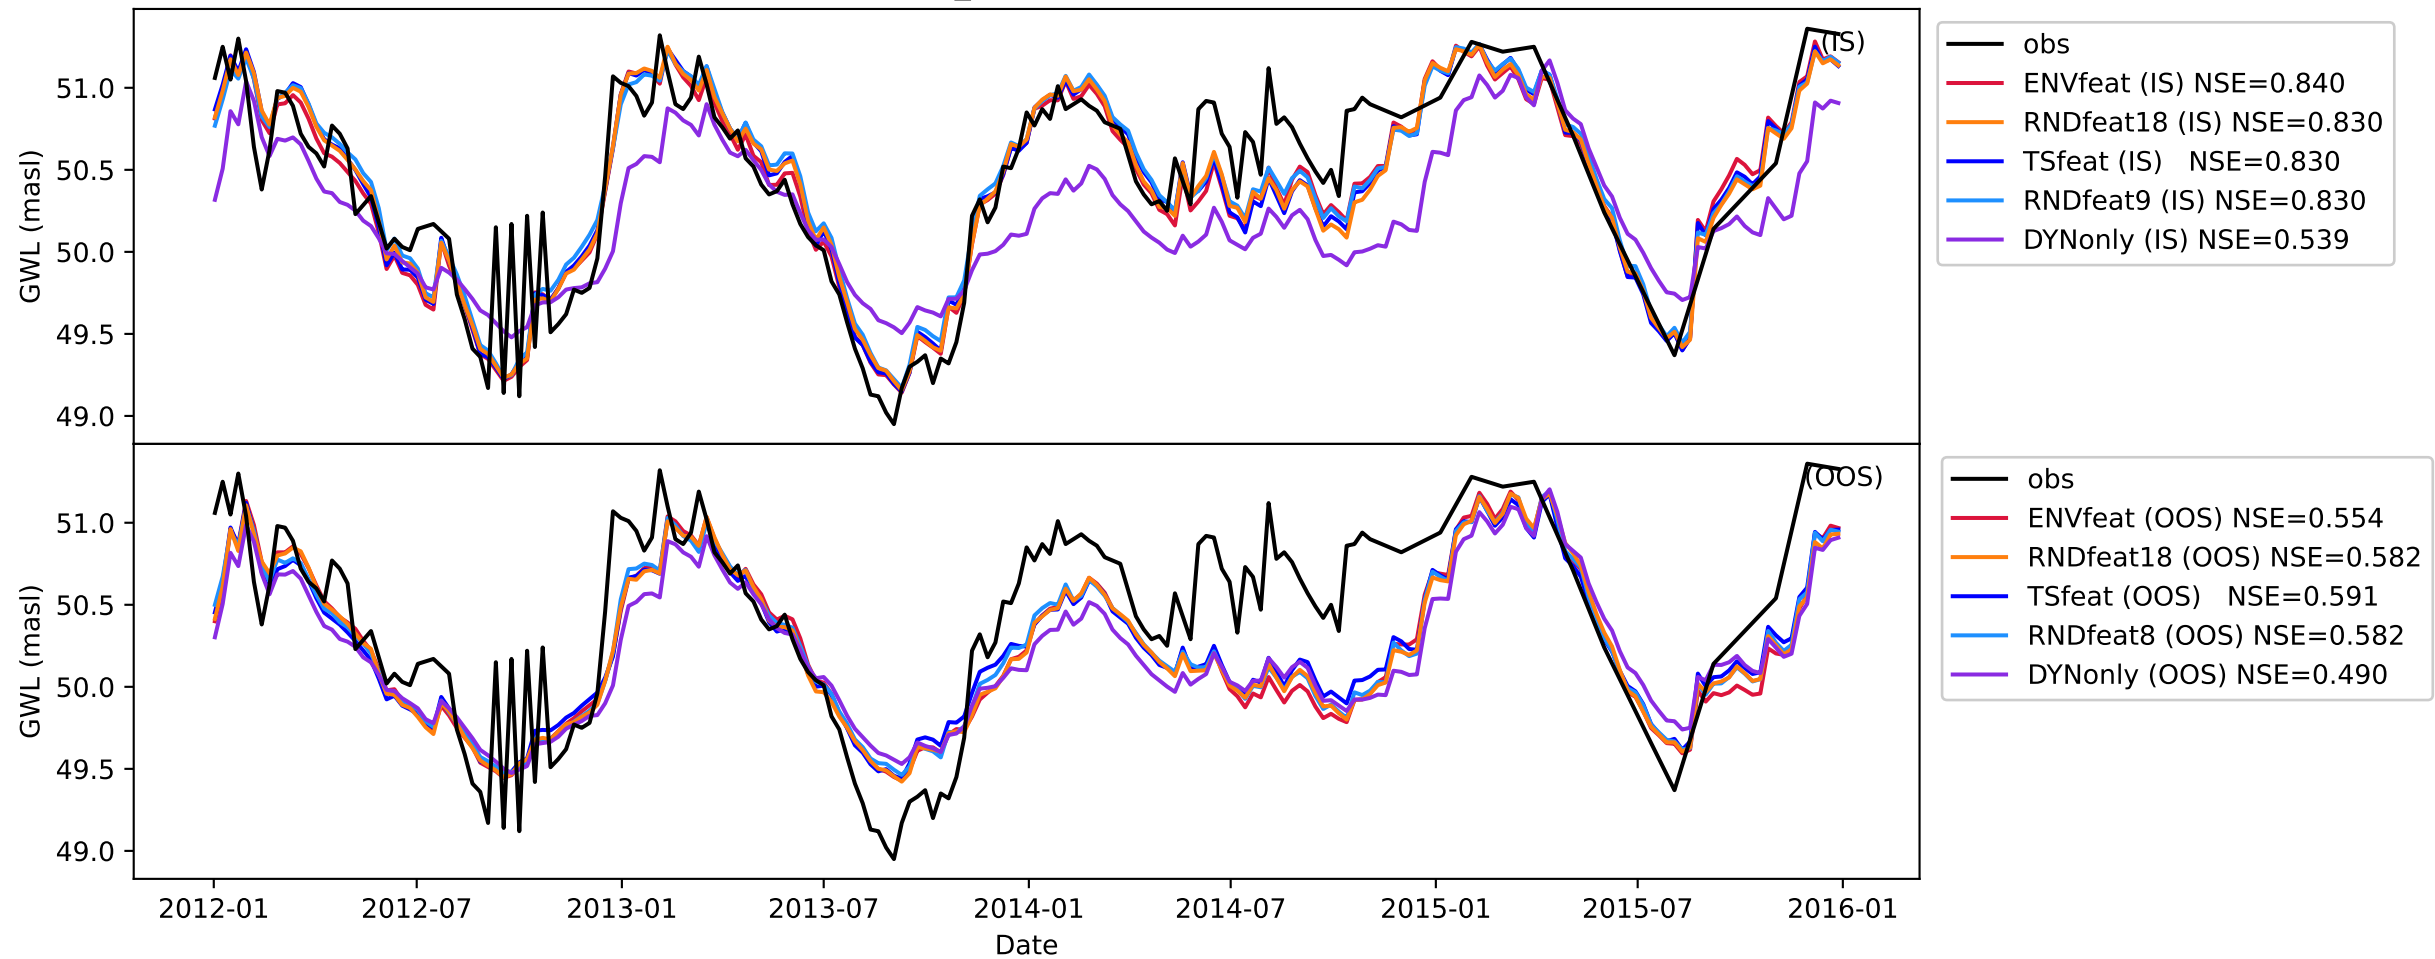

NW\_110240017

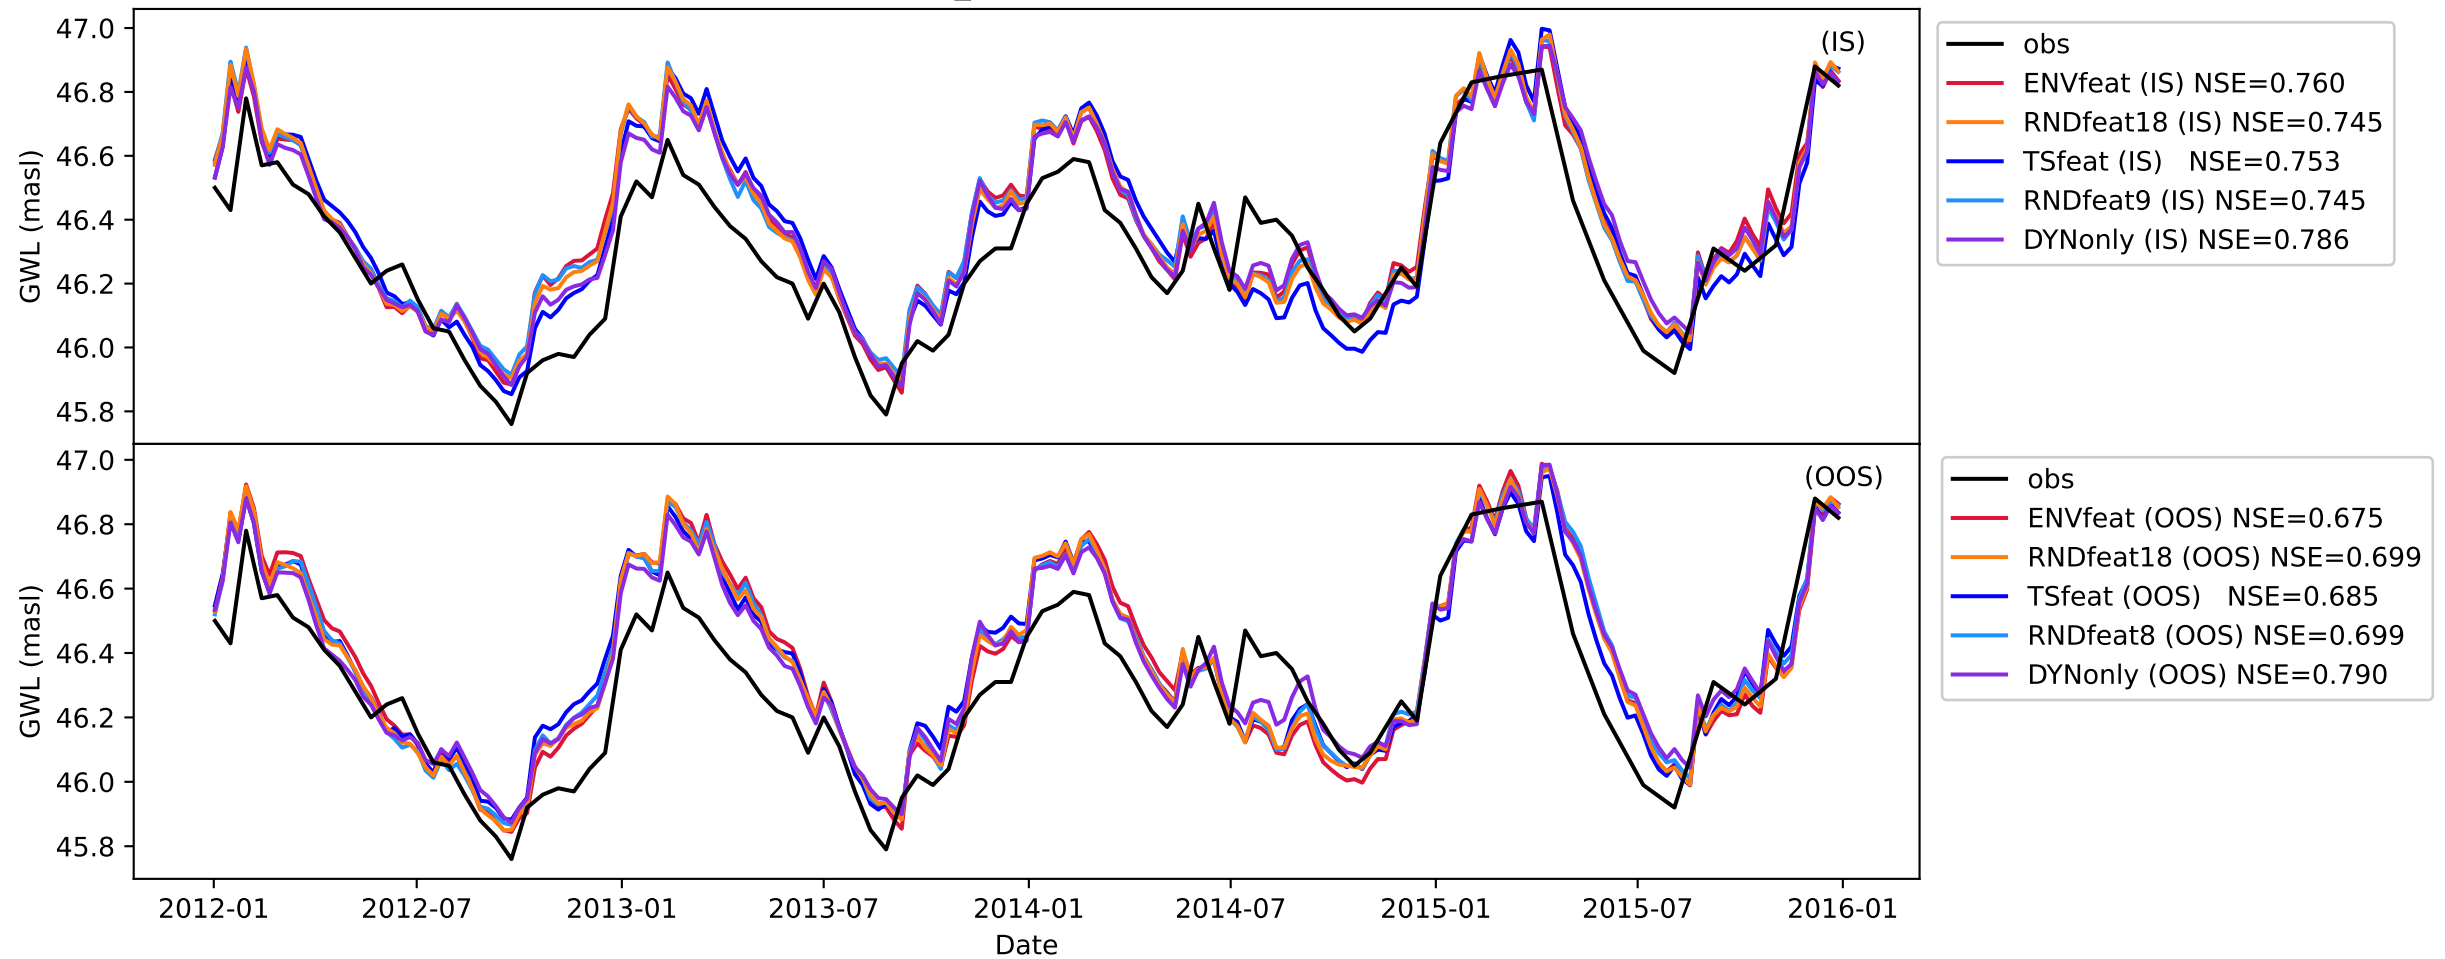

NW\_129660176

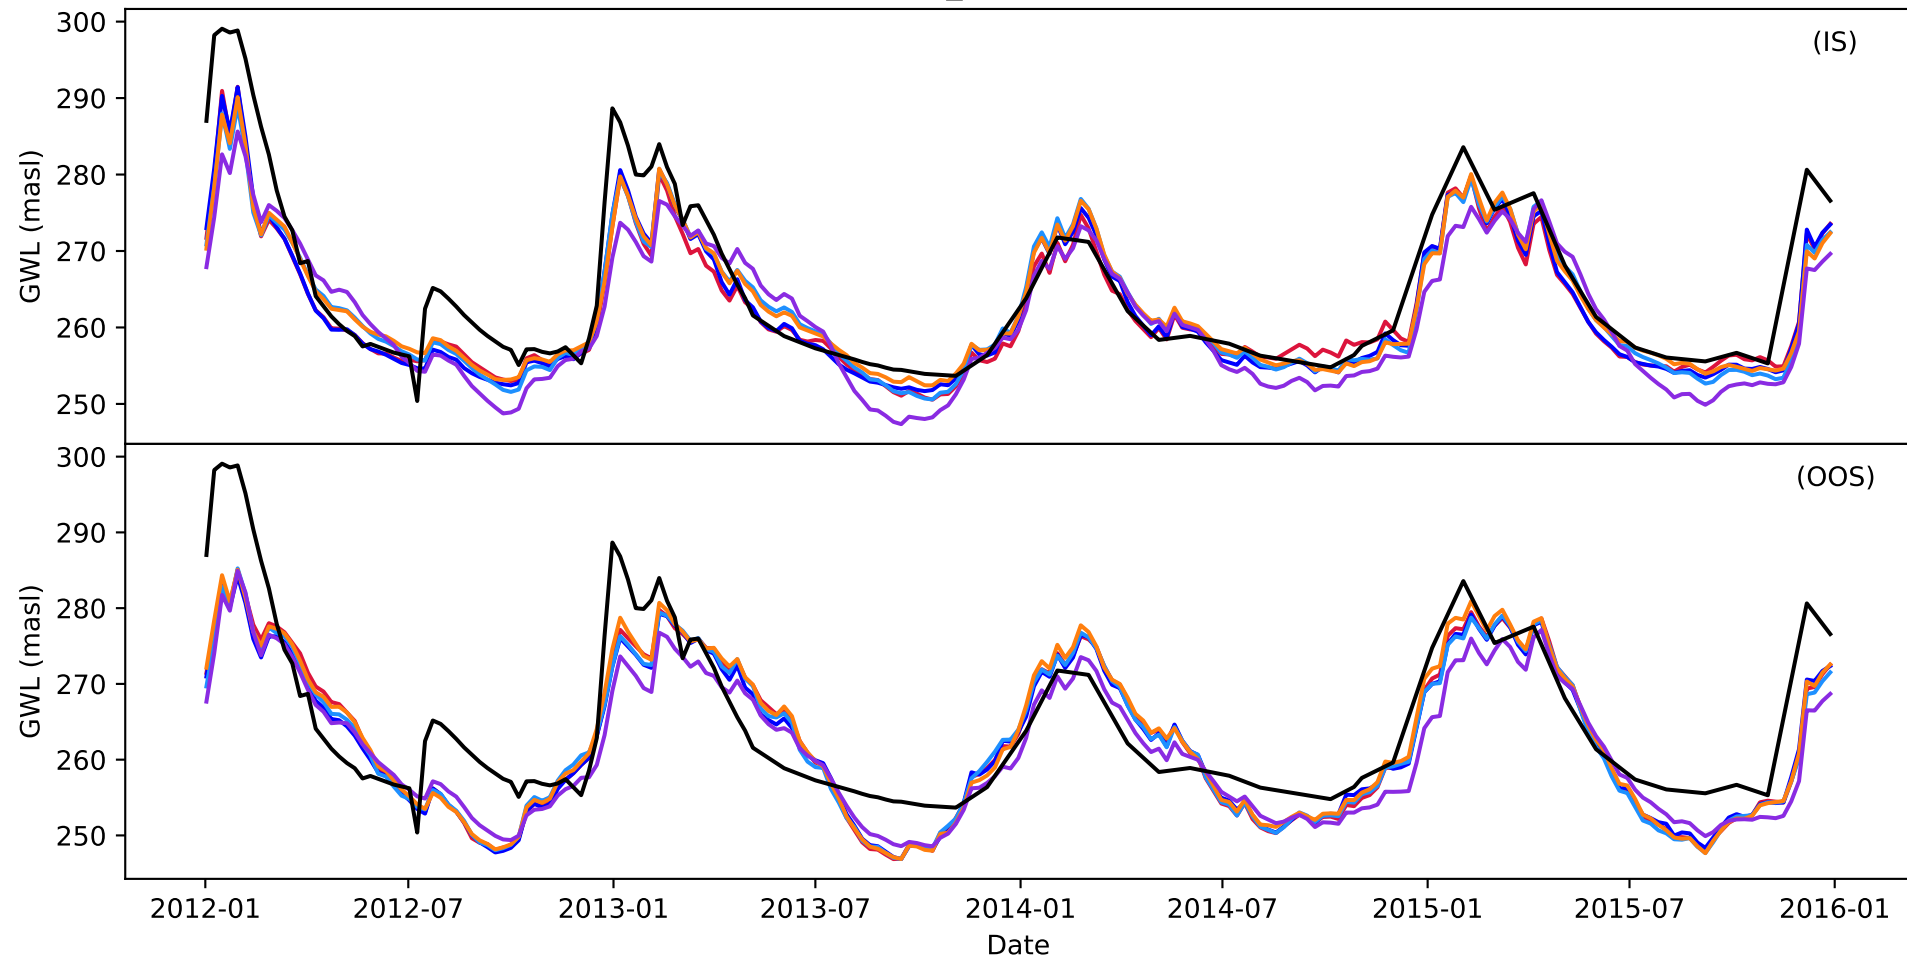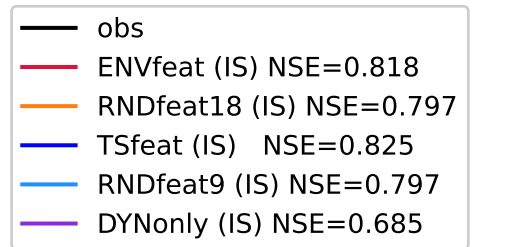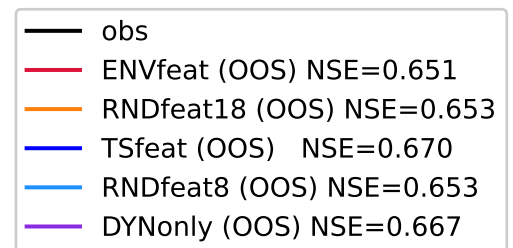

NW\_129660206

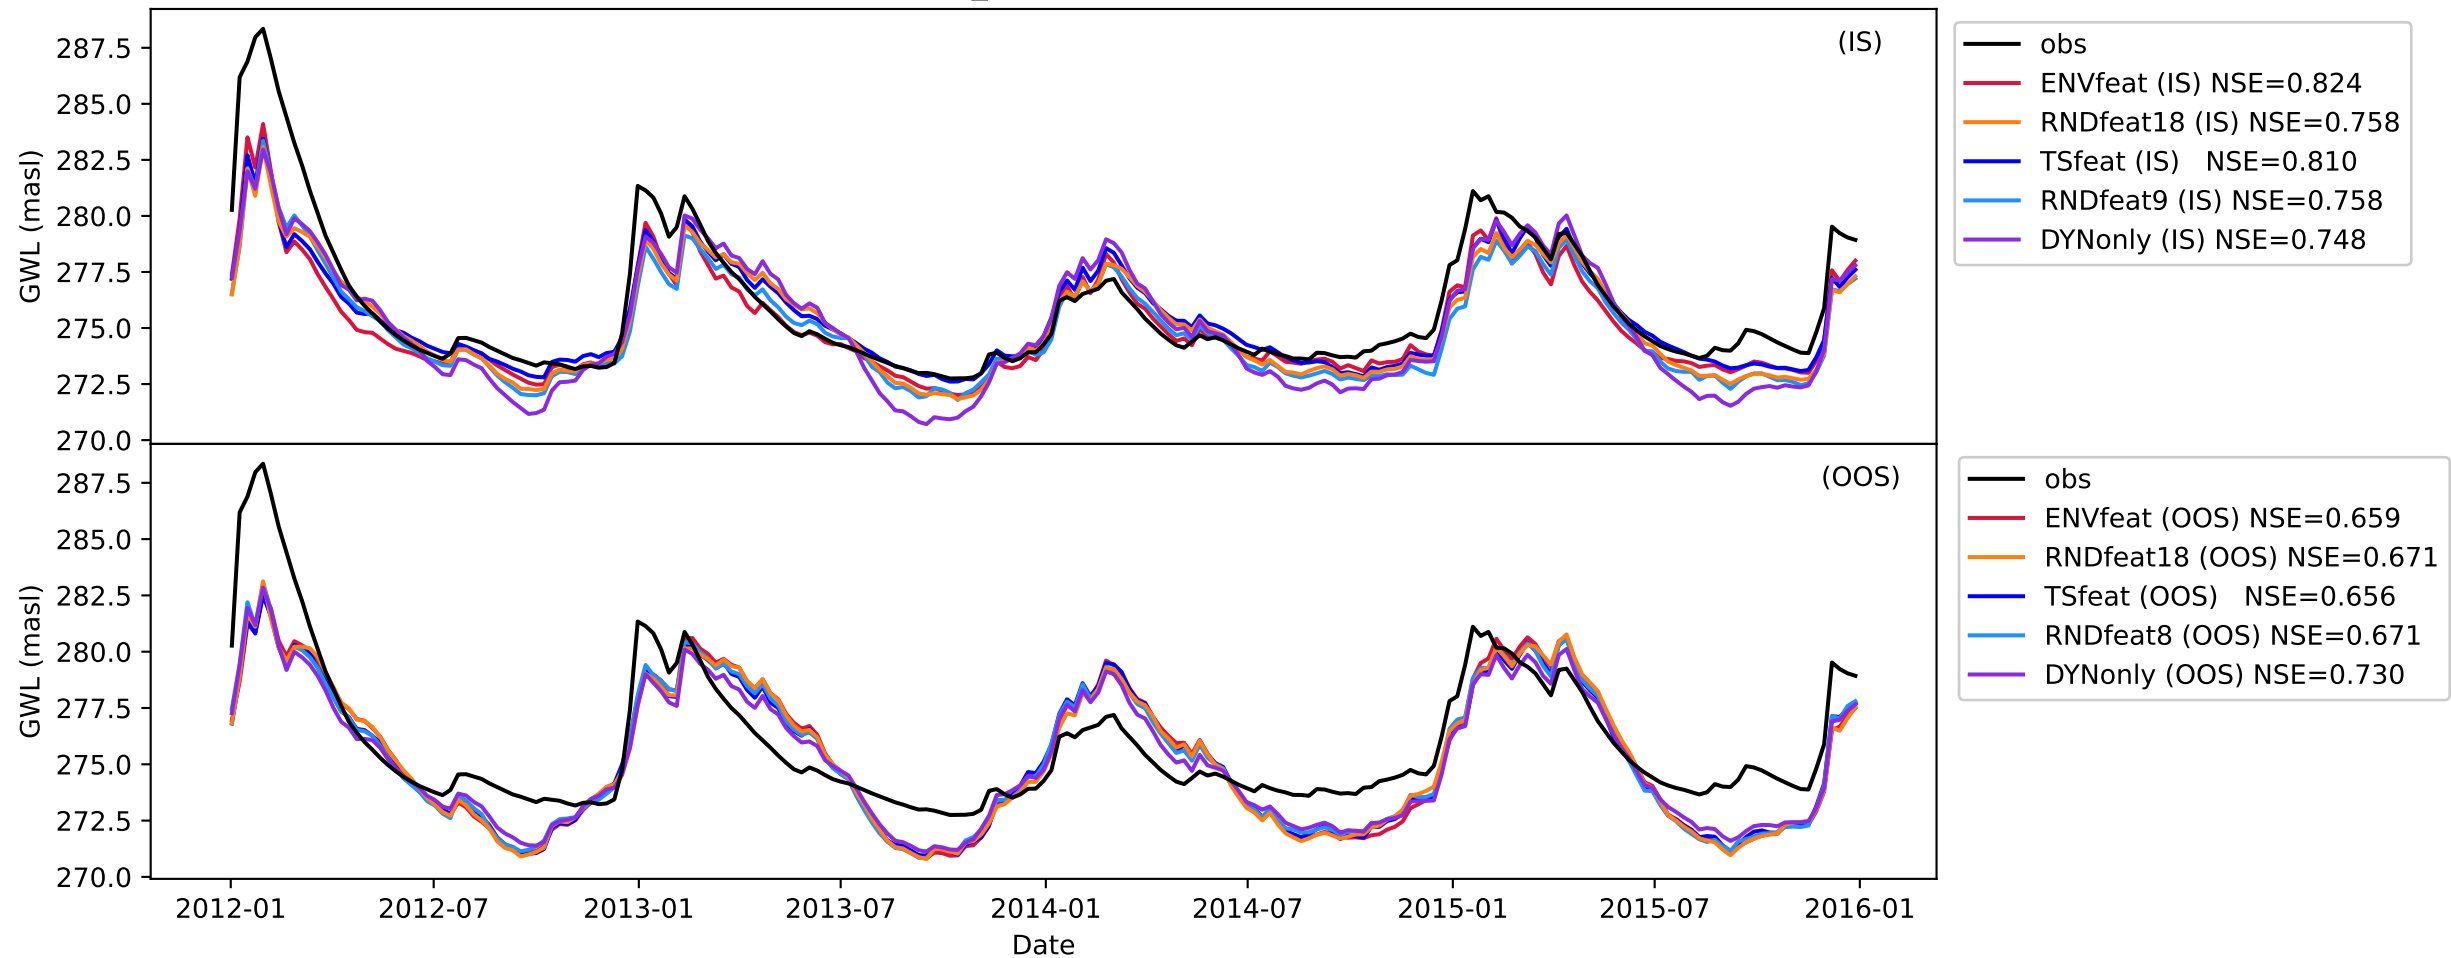

RP\_2373131200

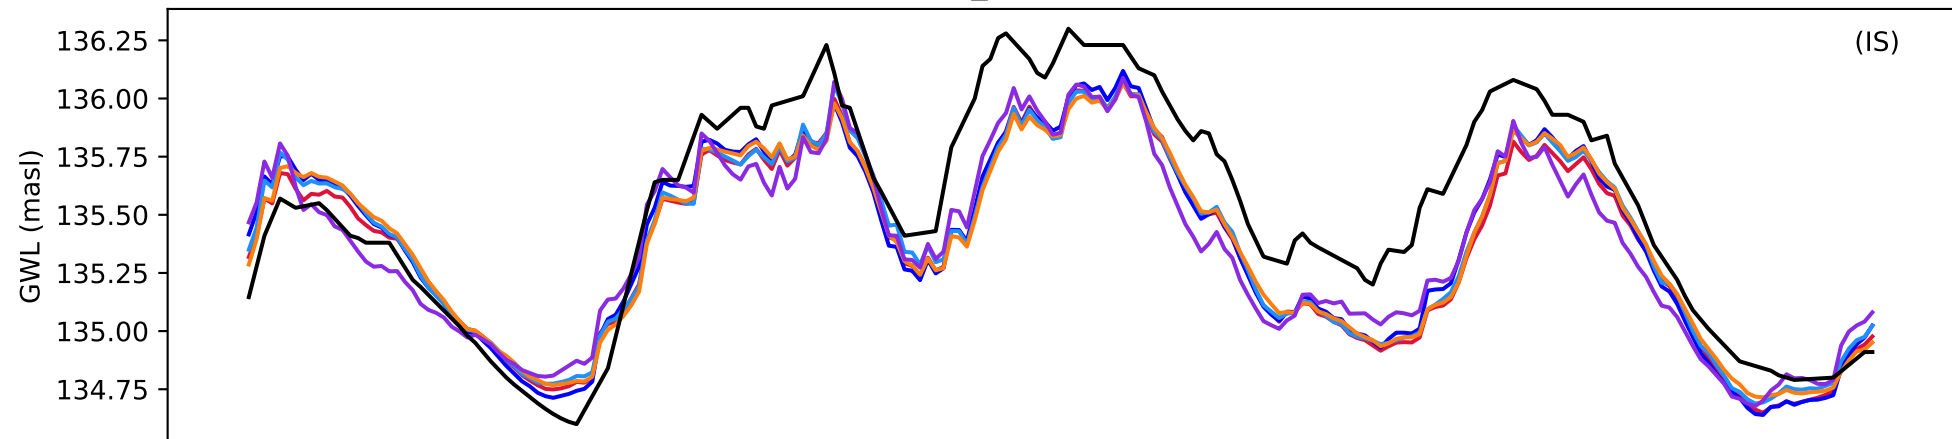

- obs
- ENVfeat (IS) NSE=0.751
- RNDfeat18 (IS) NSE=0.758
- TSfeat (IS) NSE=0.776
- RNDfeat9 (IS) NSE=0.758
- DYNOnly (IS) NSE=0.751

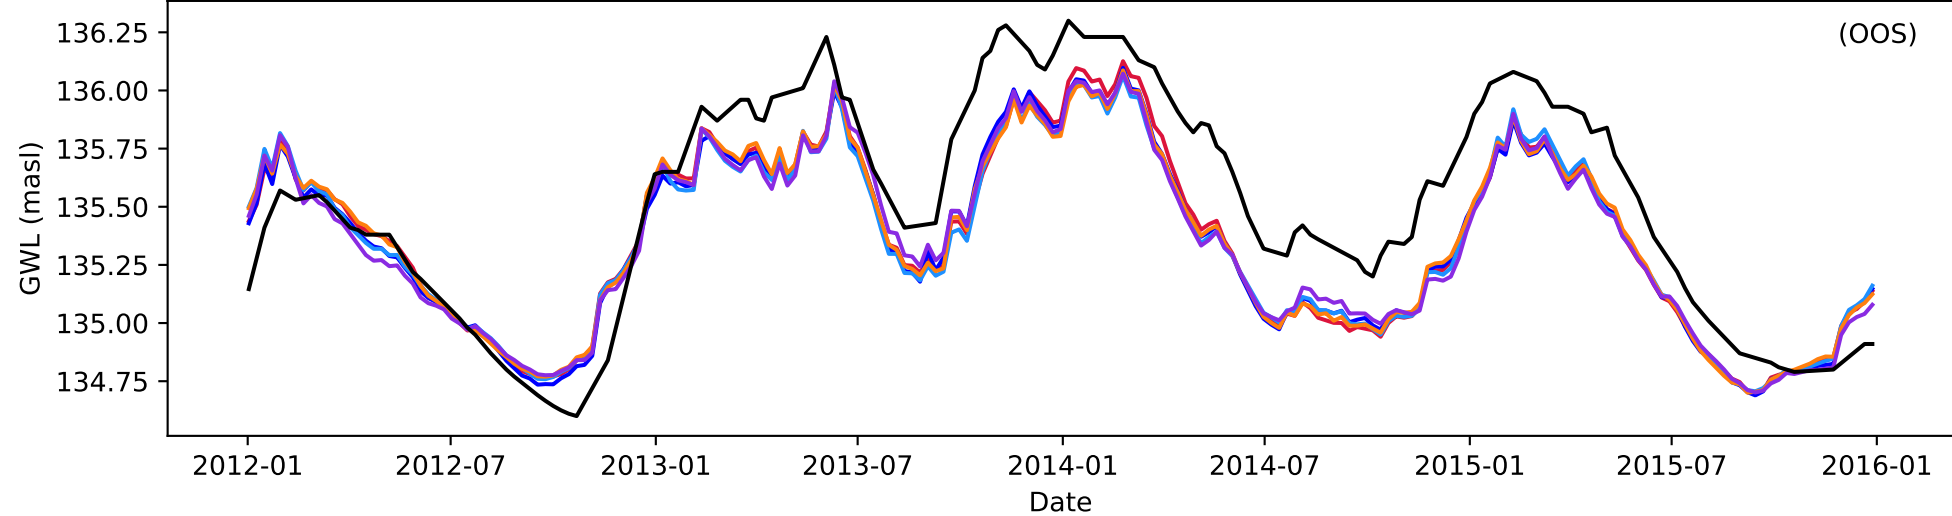

- obs
- ENVfeat (OOS) NSE=0.722
- RNDfeat18 (OOS) NSE=0.706
- TSfeat (OOS) NSE=0.708
- RNDfeat8 (OOS) NSE=0.706
- DYNOnly (OOS) NSE=0.731

RP\_2378140100

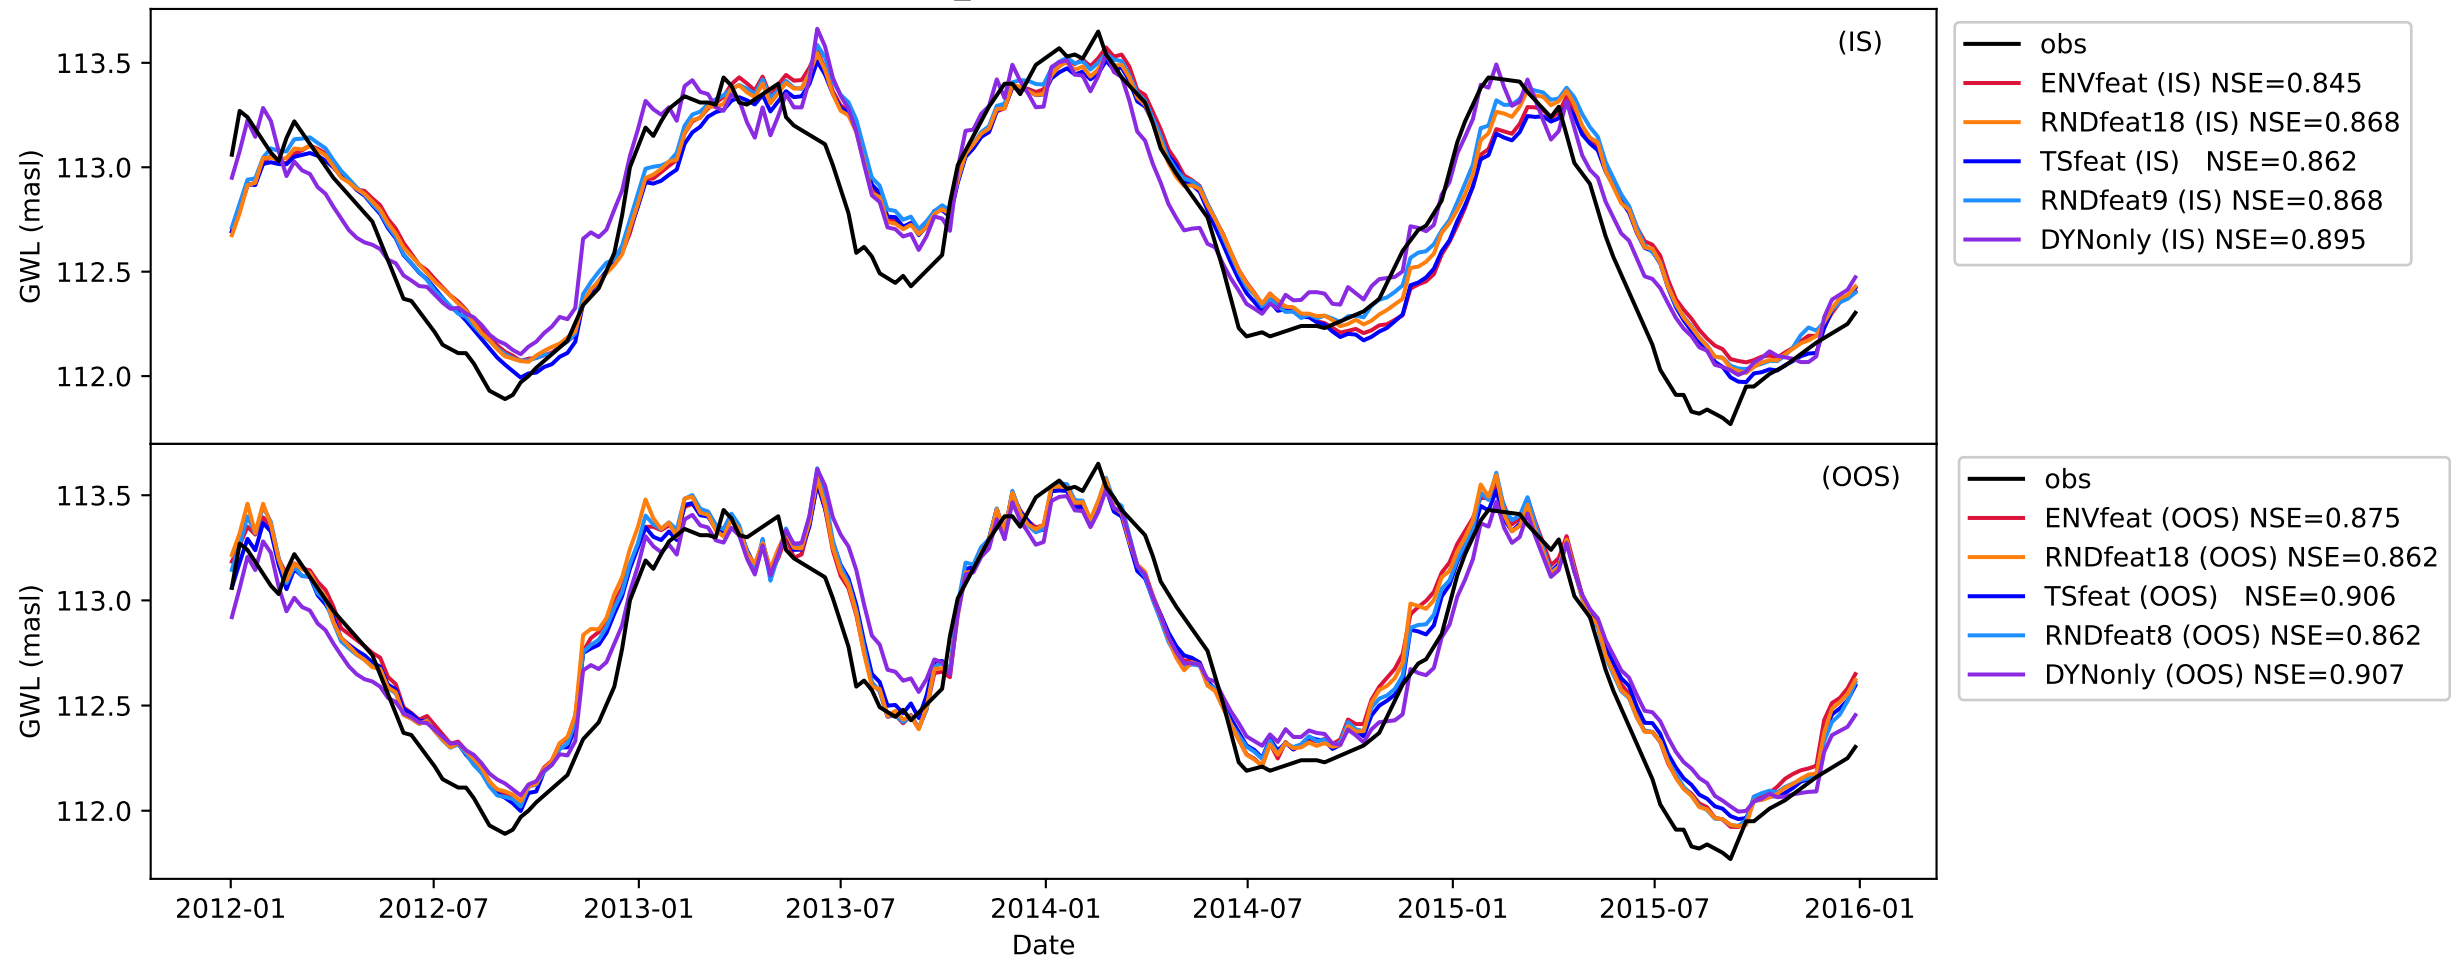



SH\_10L53126001

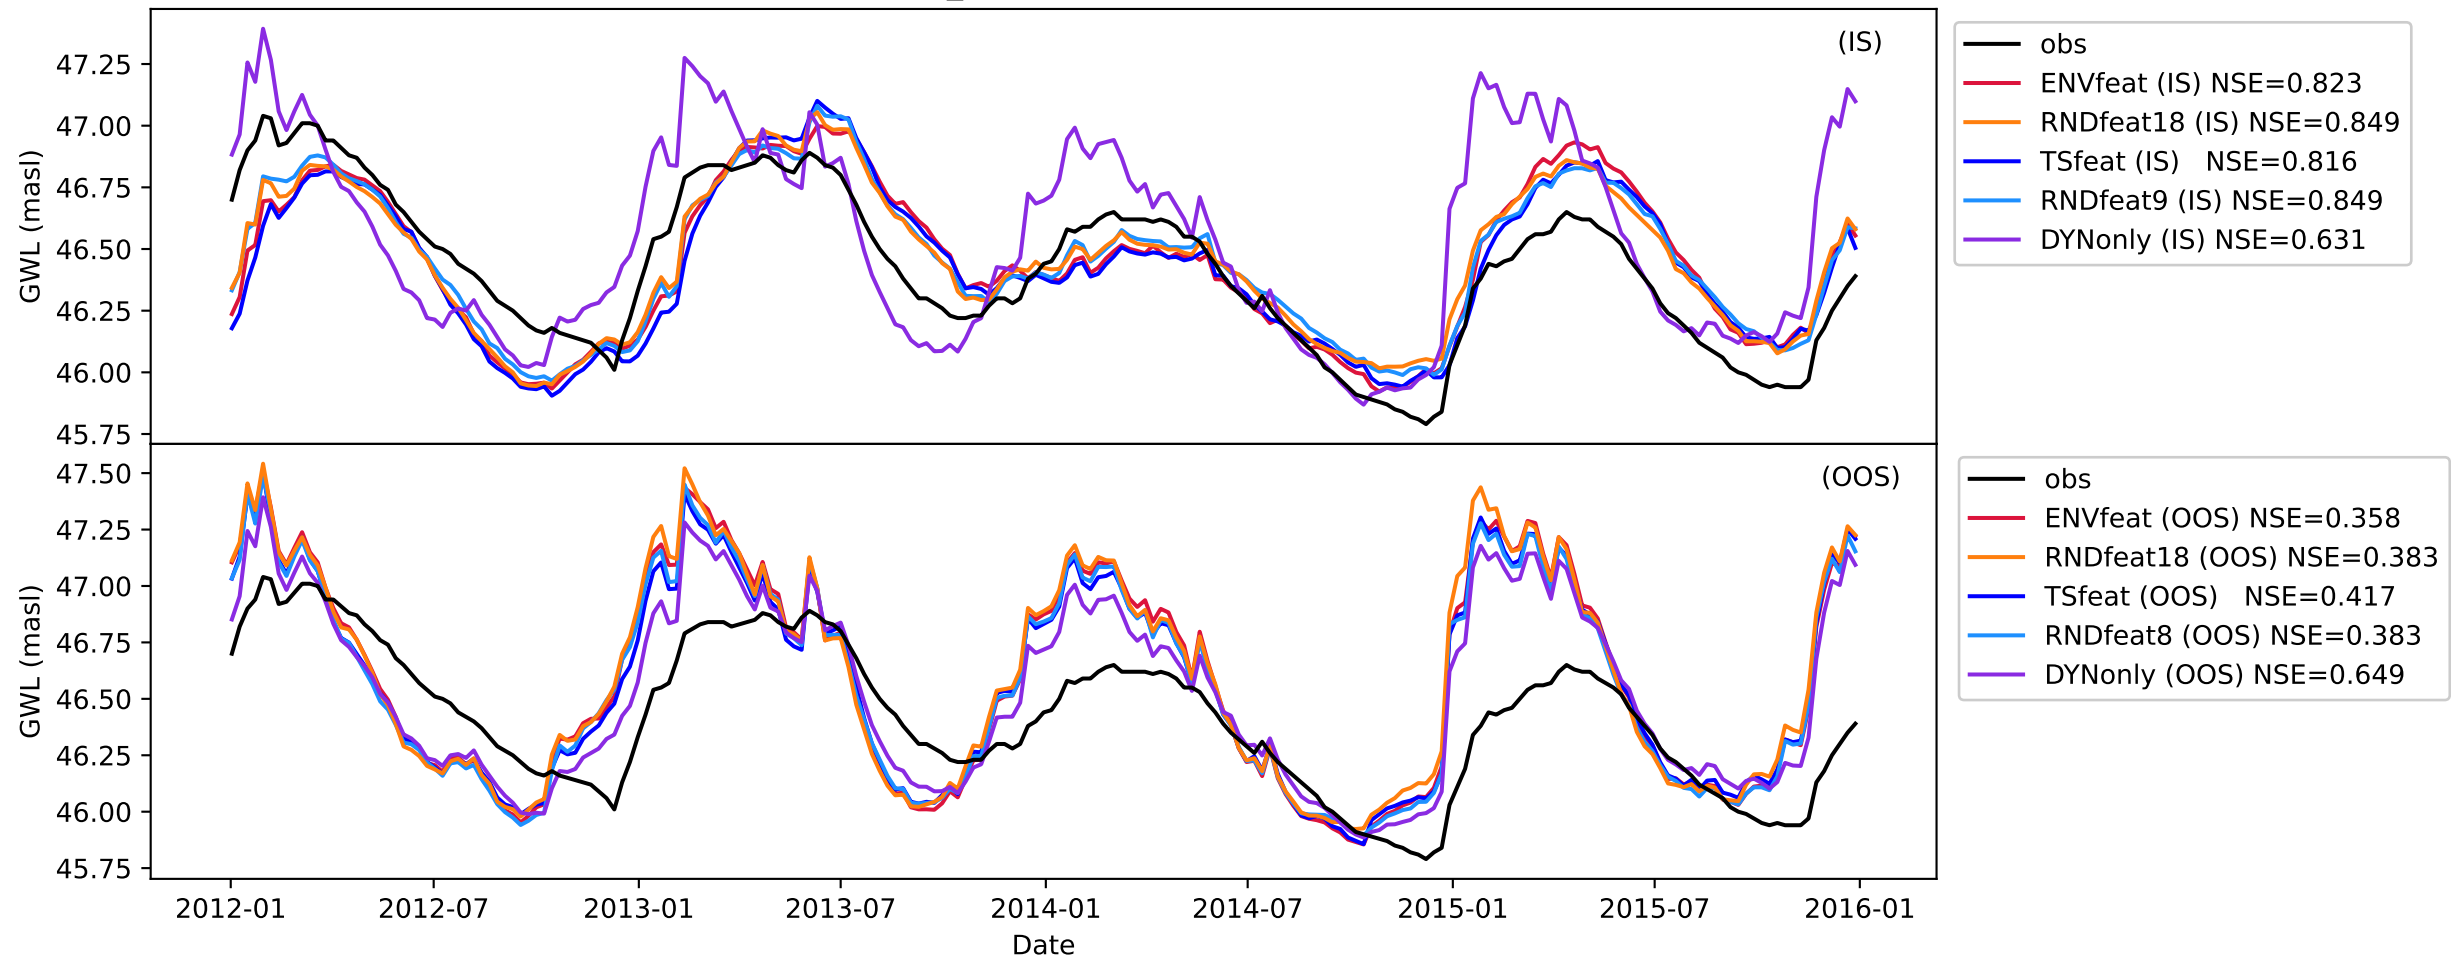

SH\_10L55038005

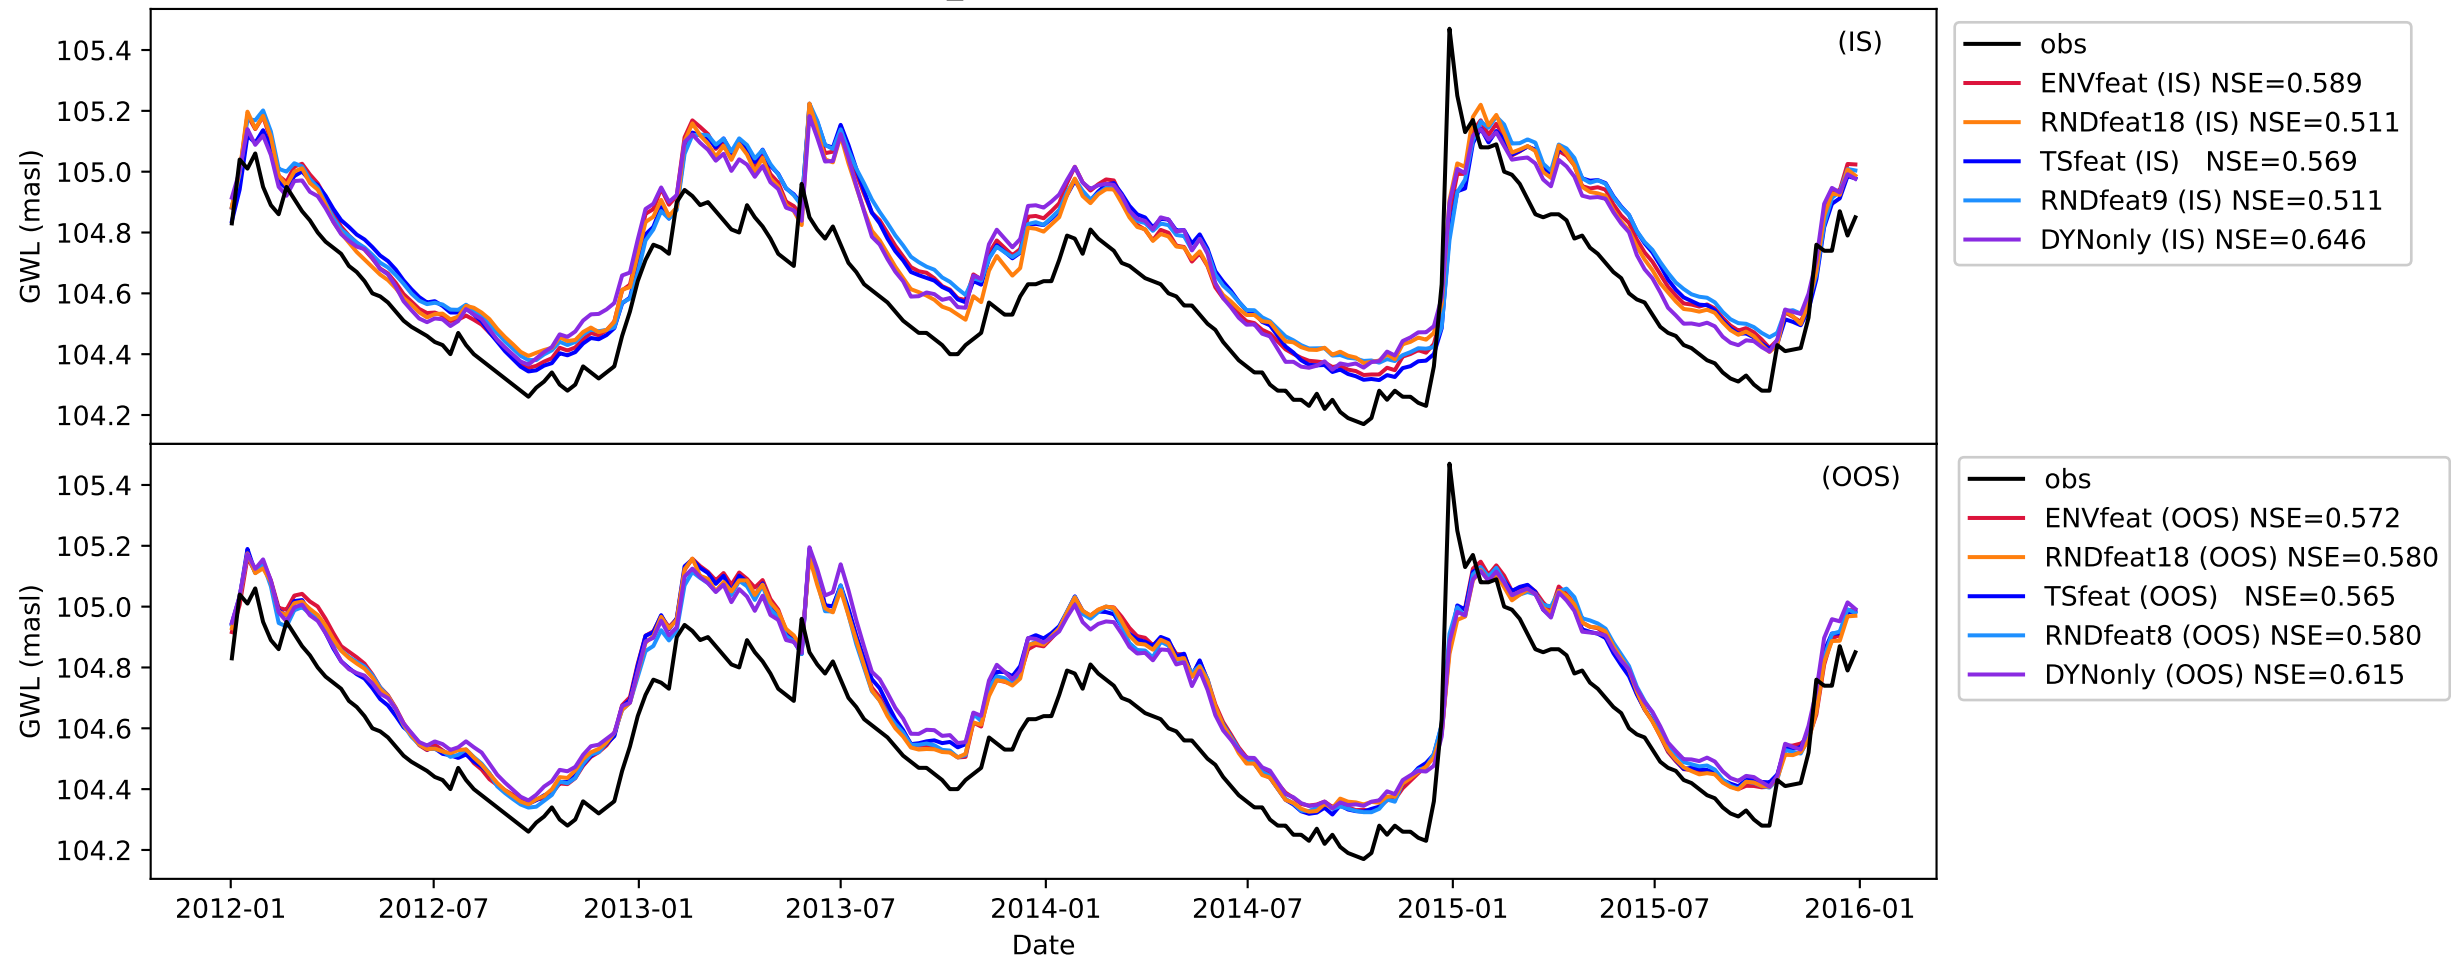

SH\_10L56048003

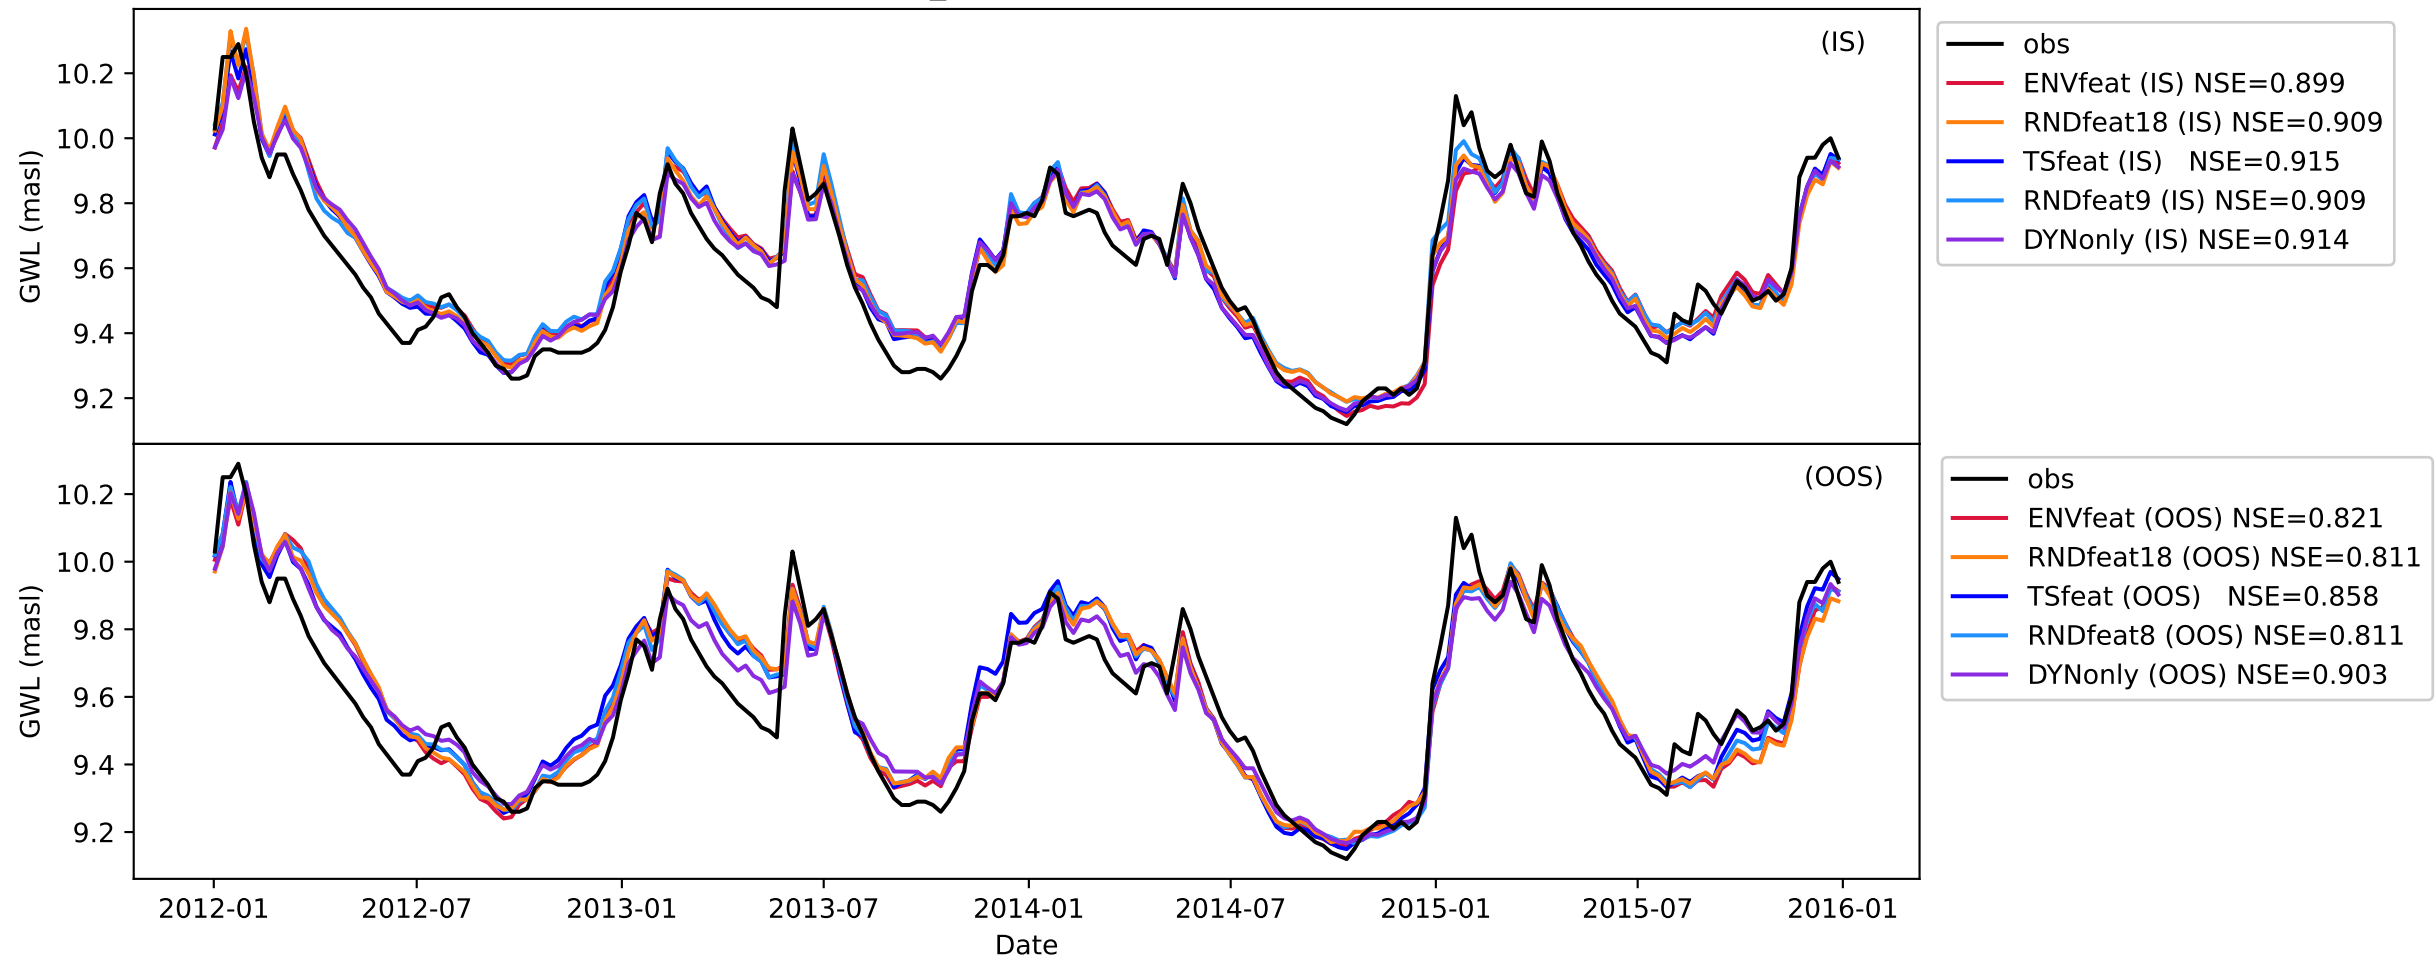

SH\_10L57066002

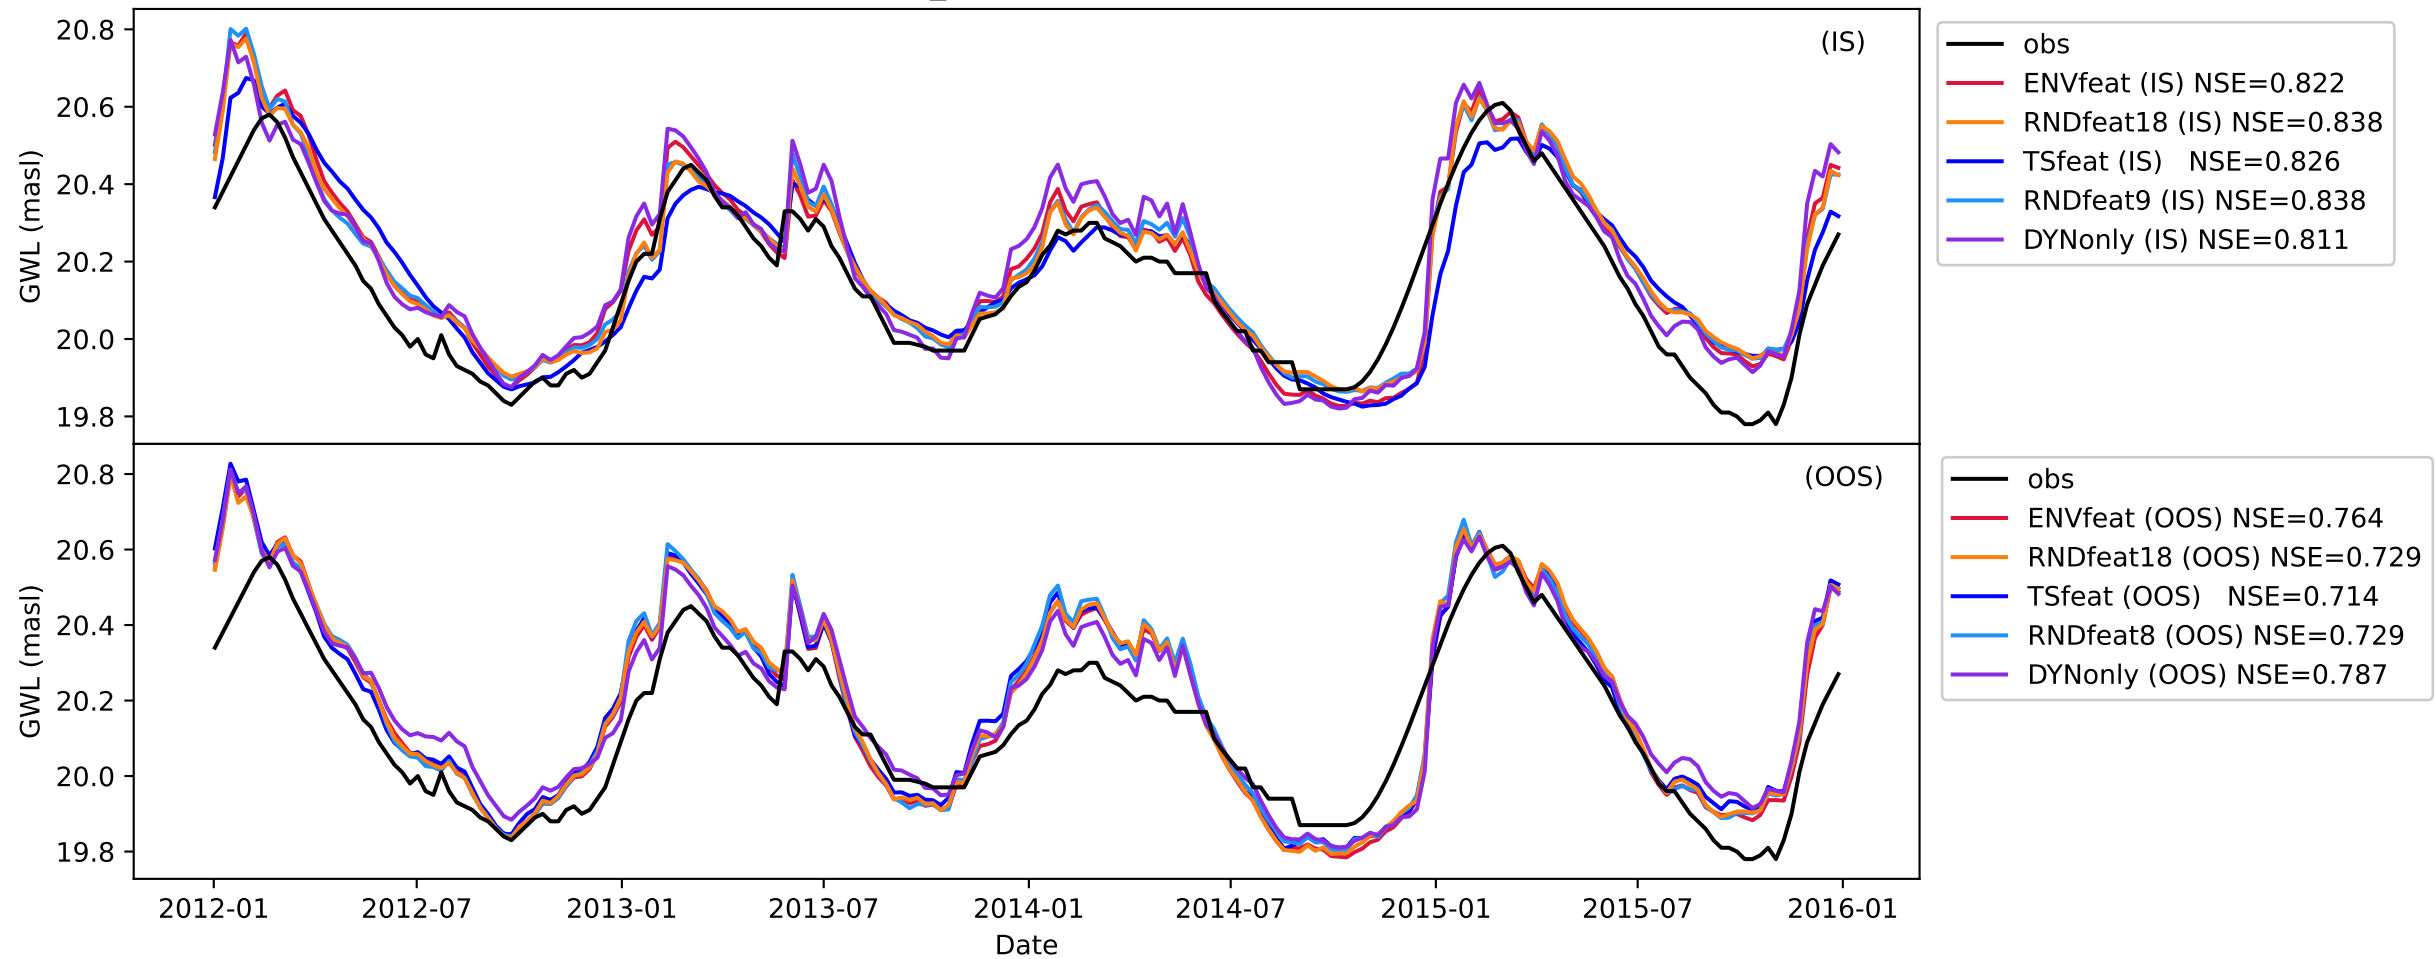

SH\_10L62060004

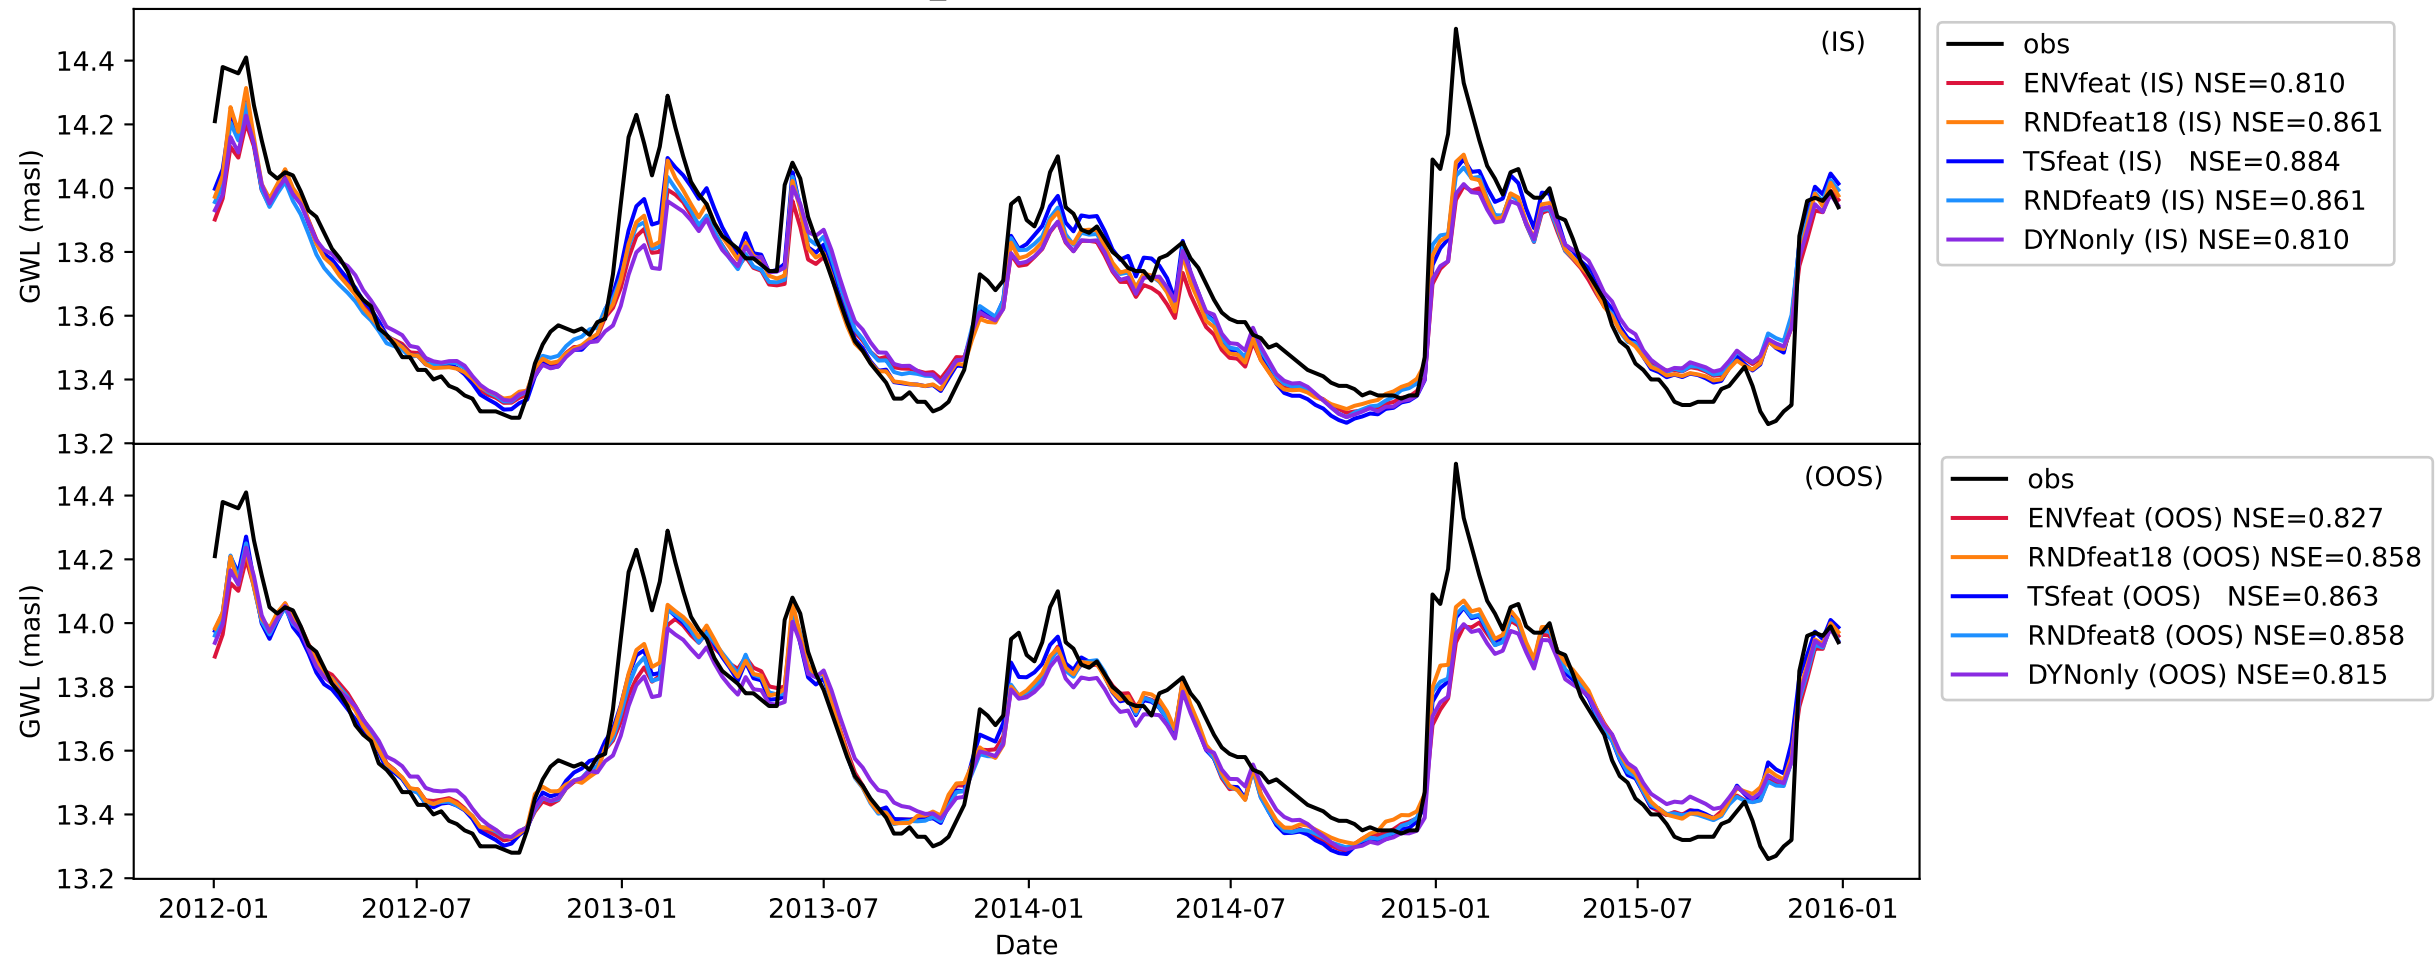

SN\_46440927

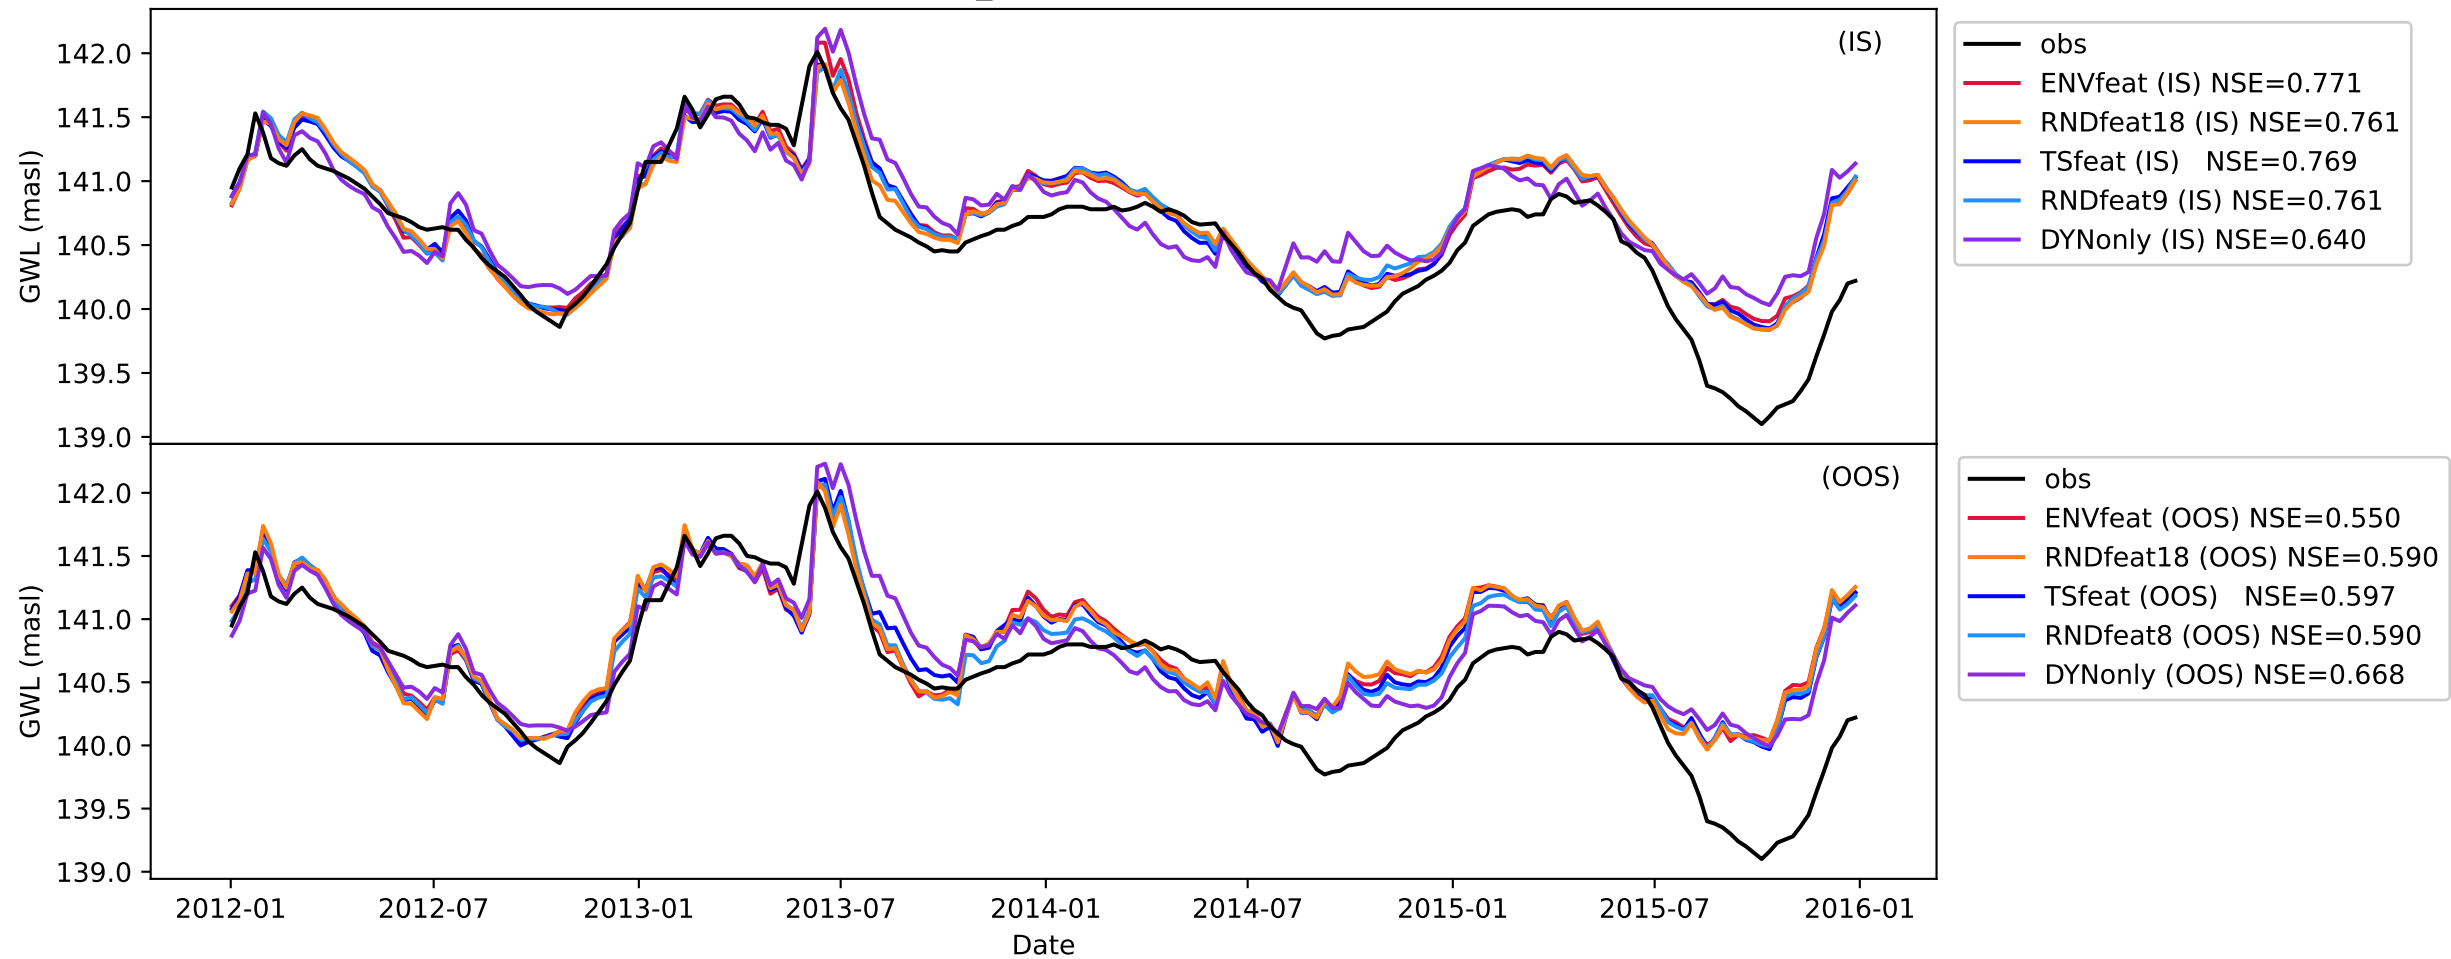

SN\_46460564

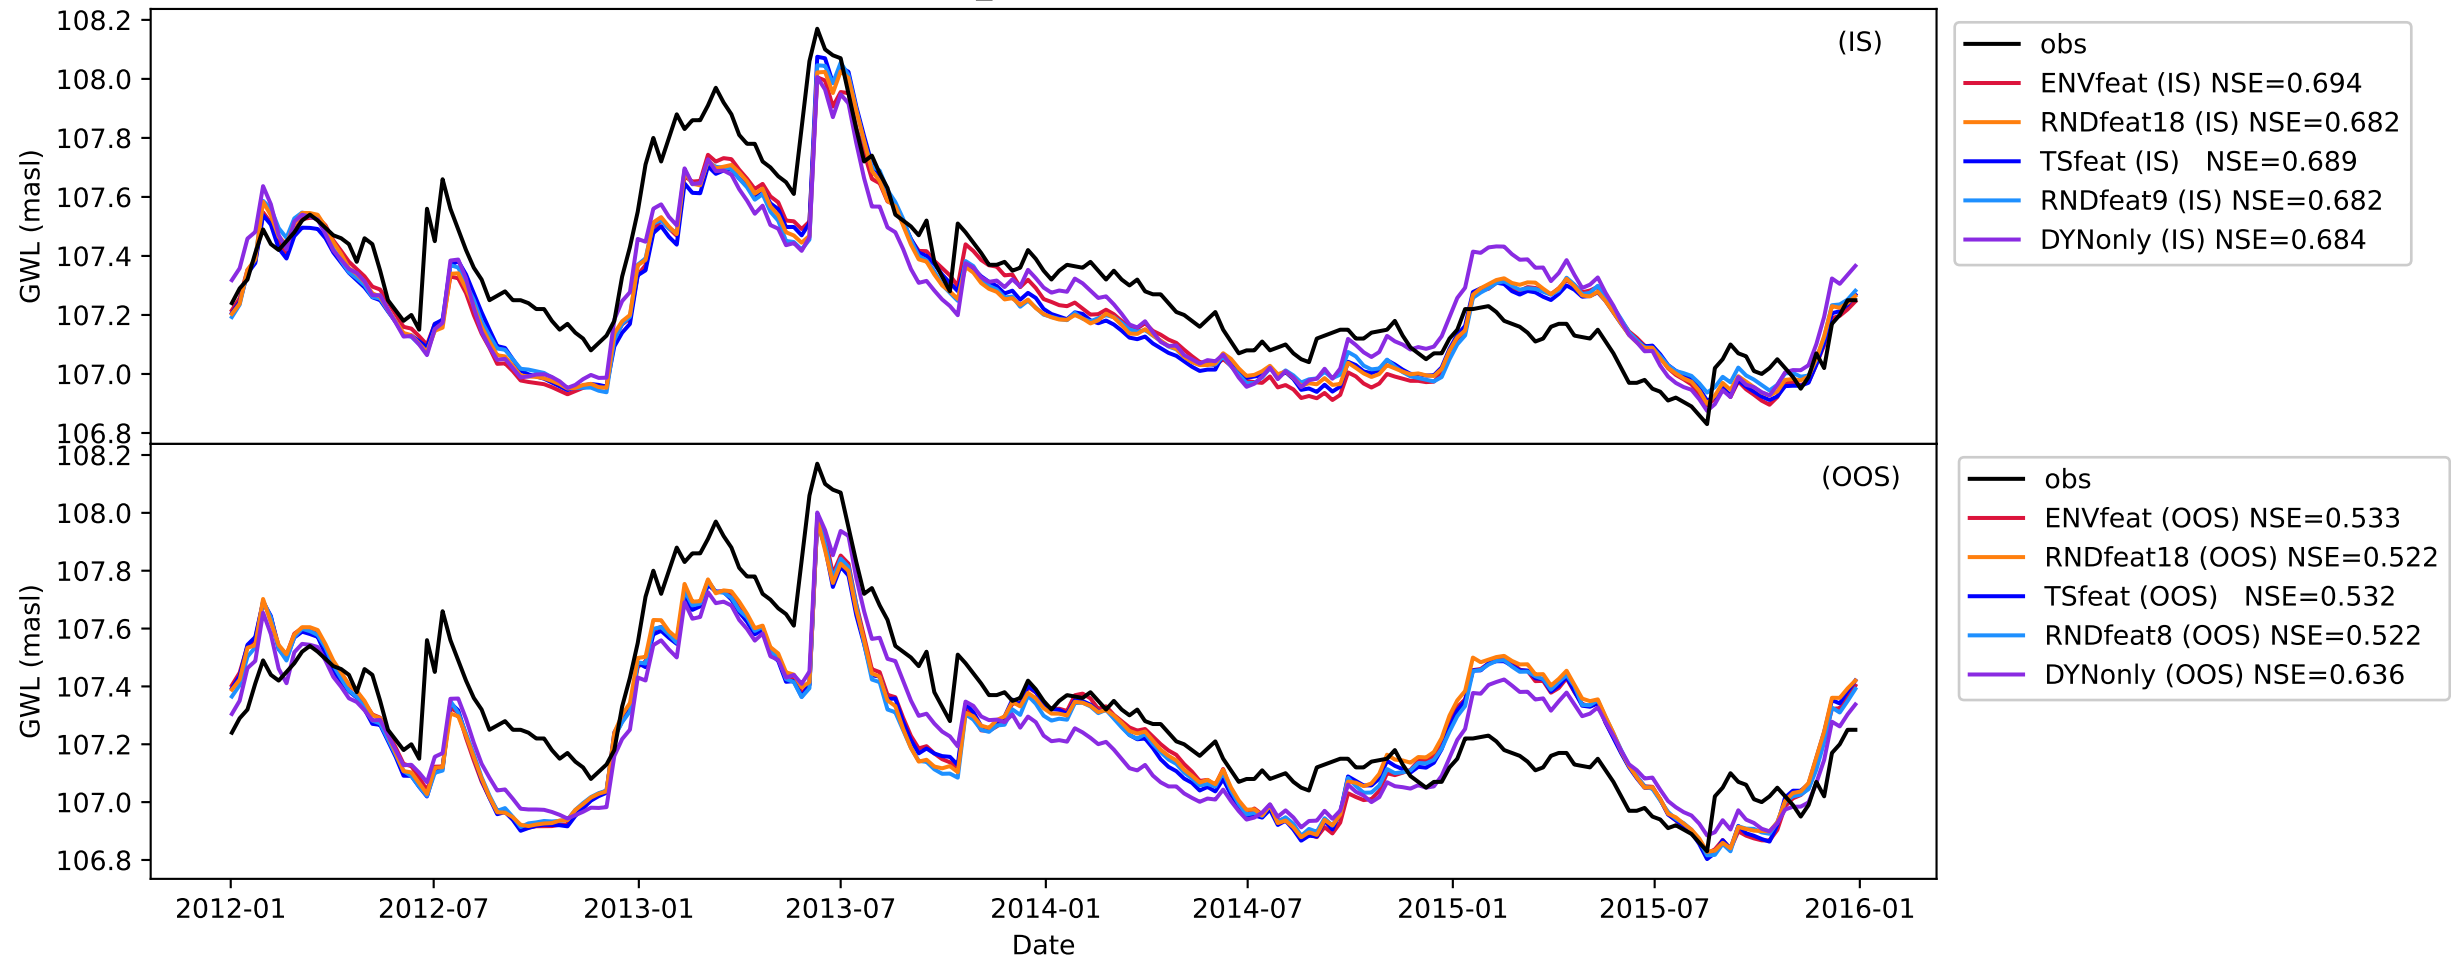

SN\_47500596

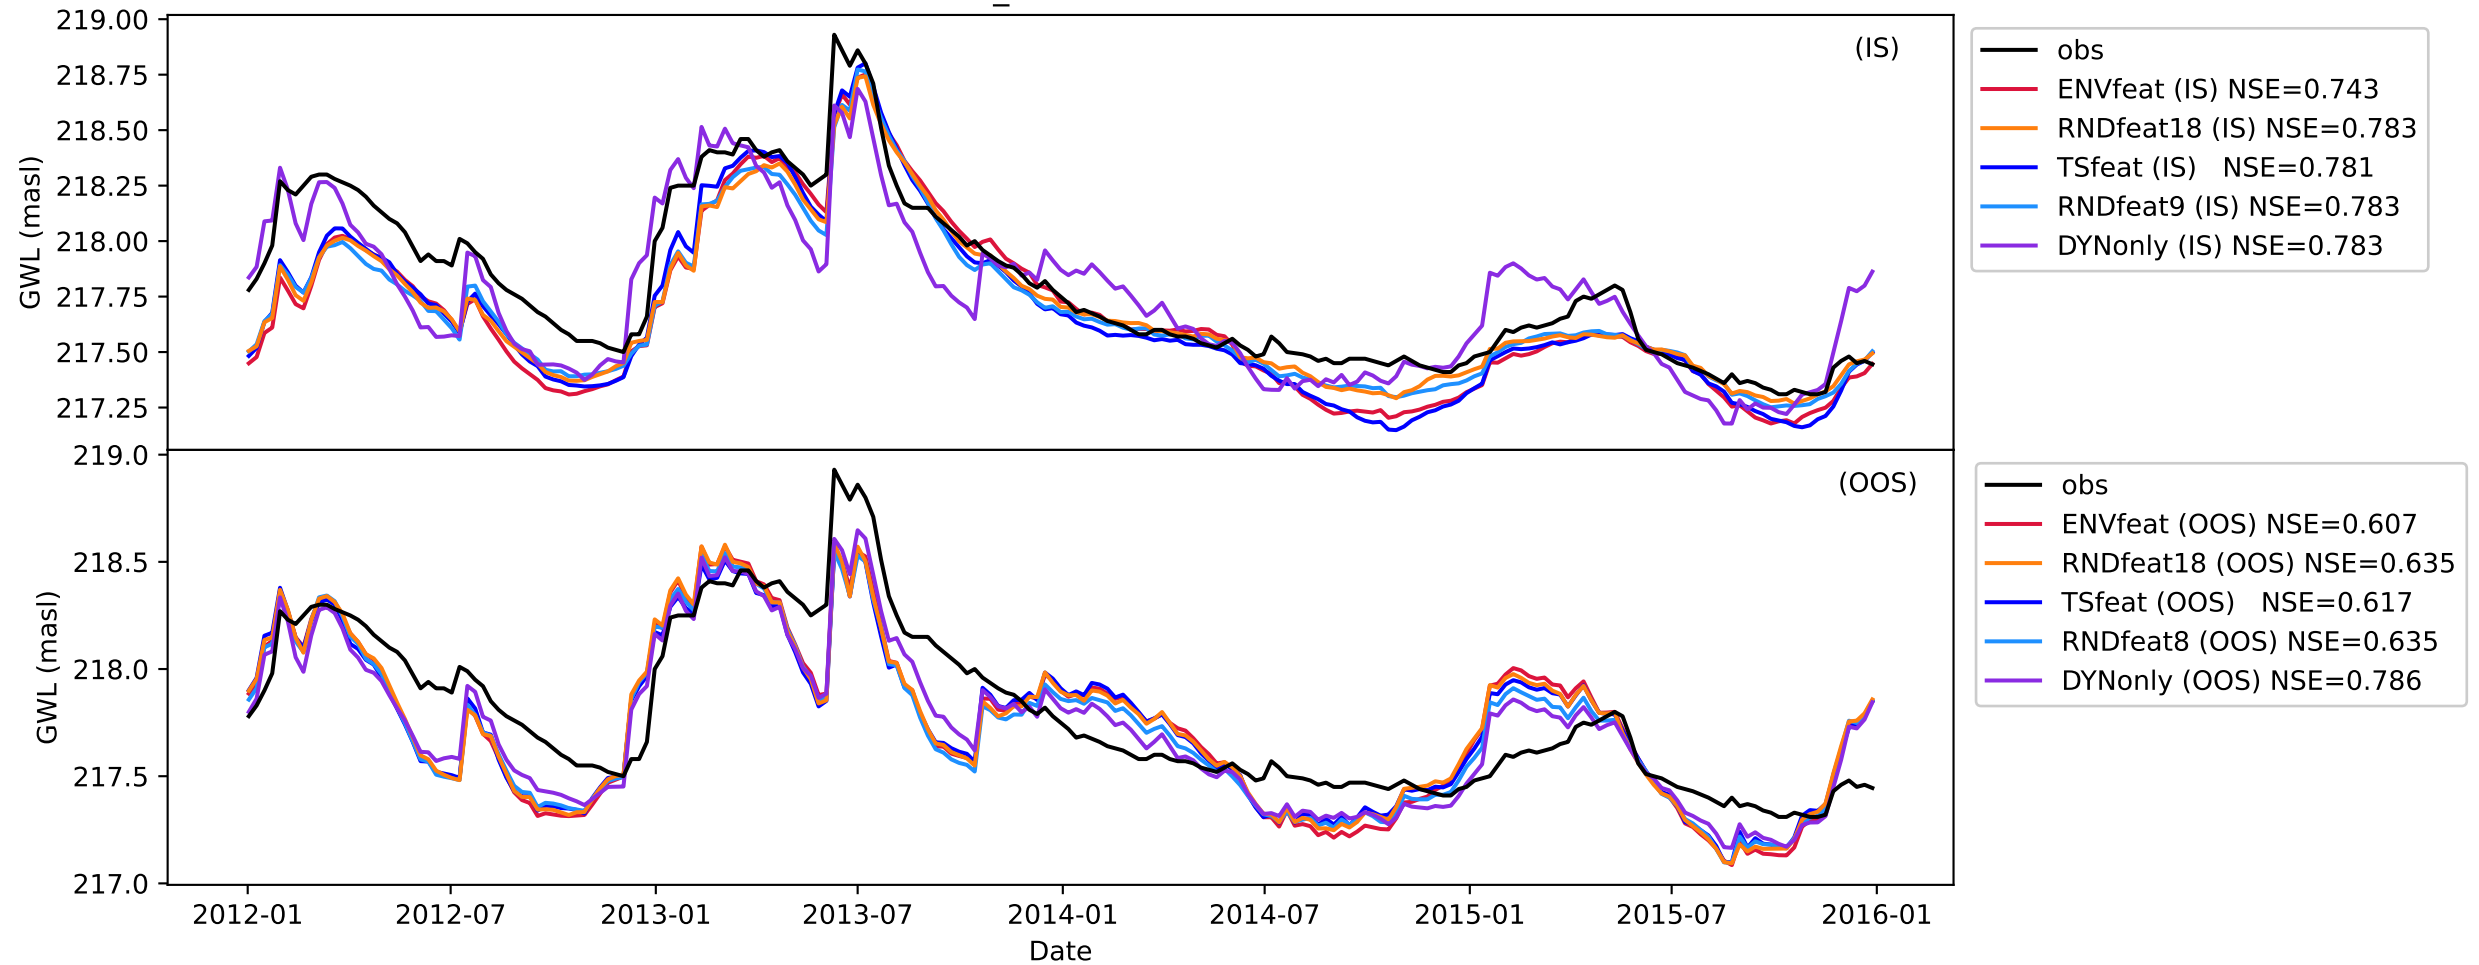



SN\_48390509

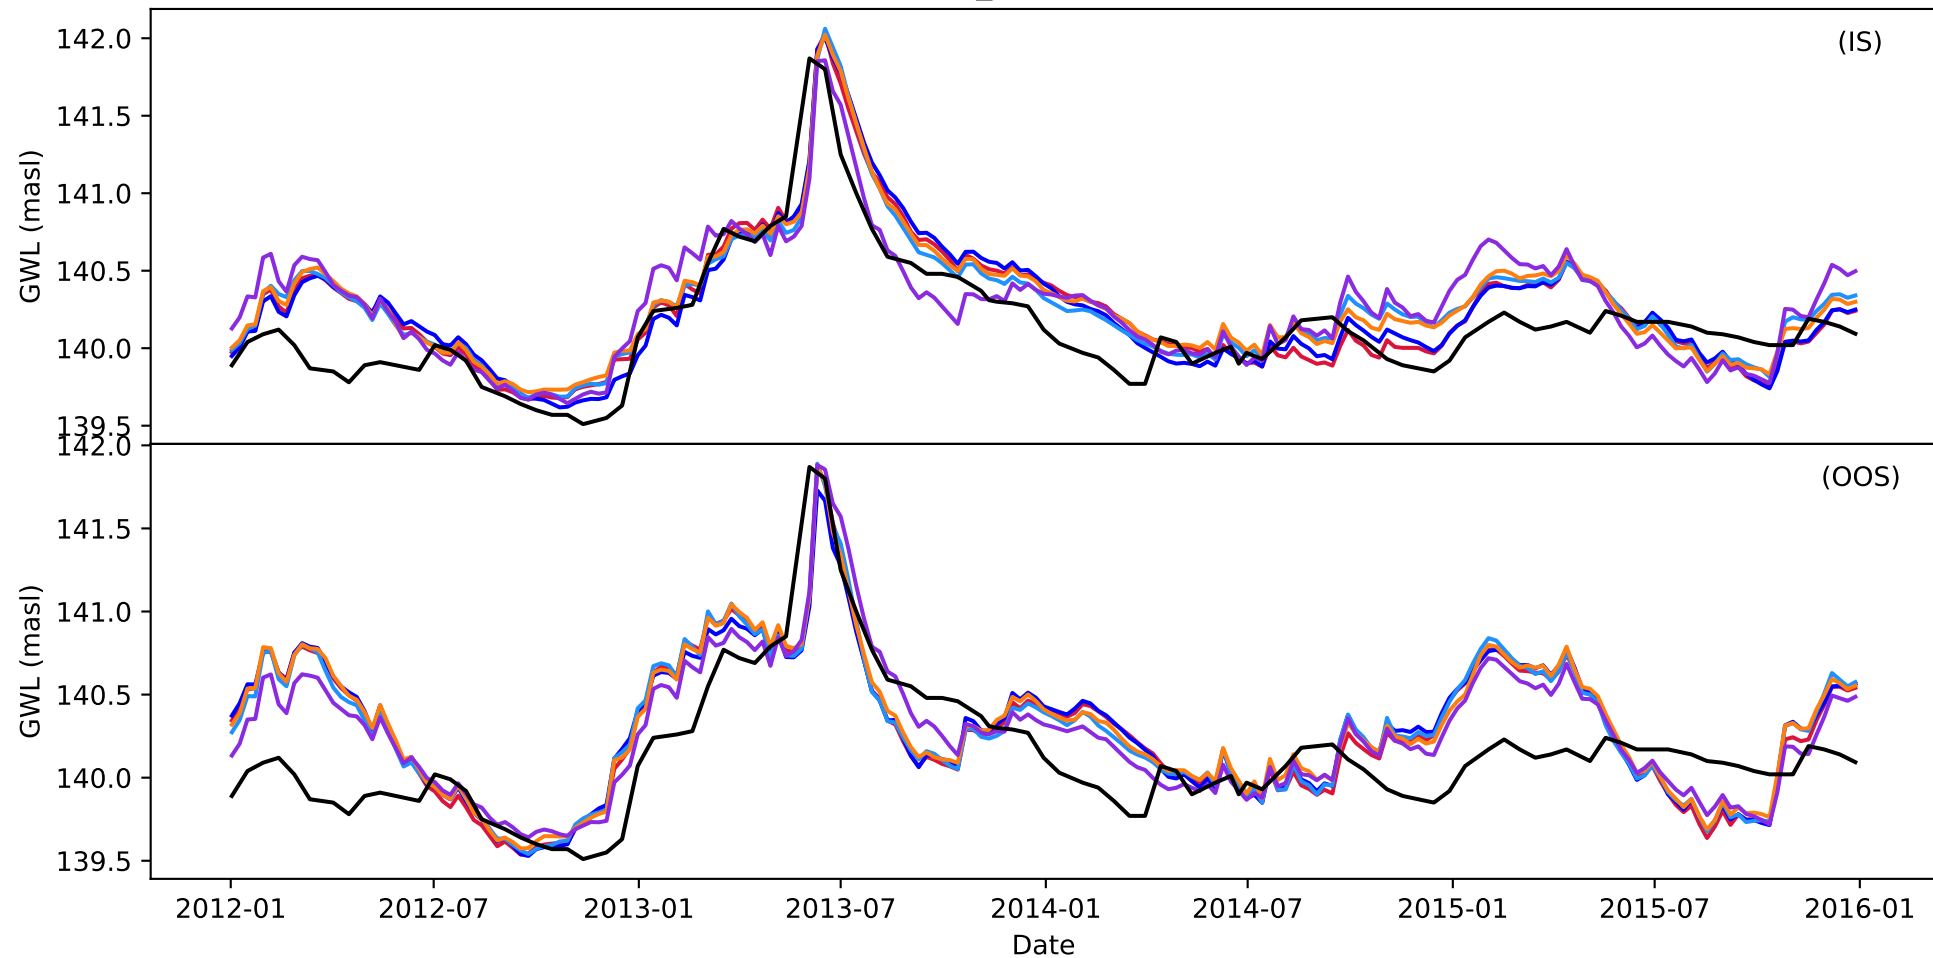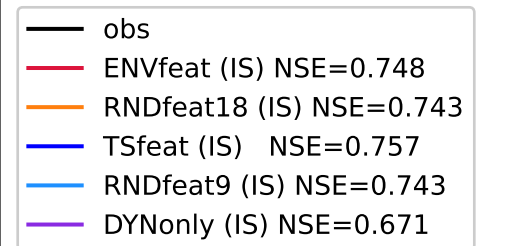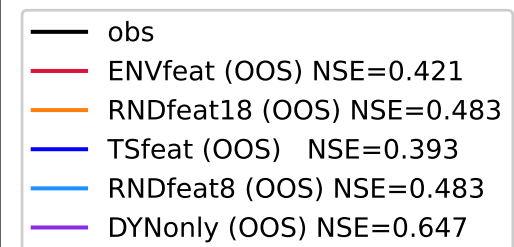

SN\_49430964

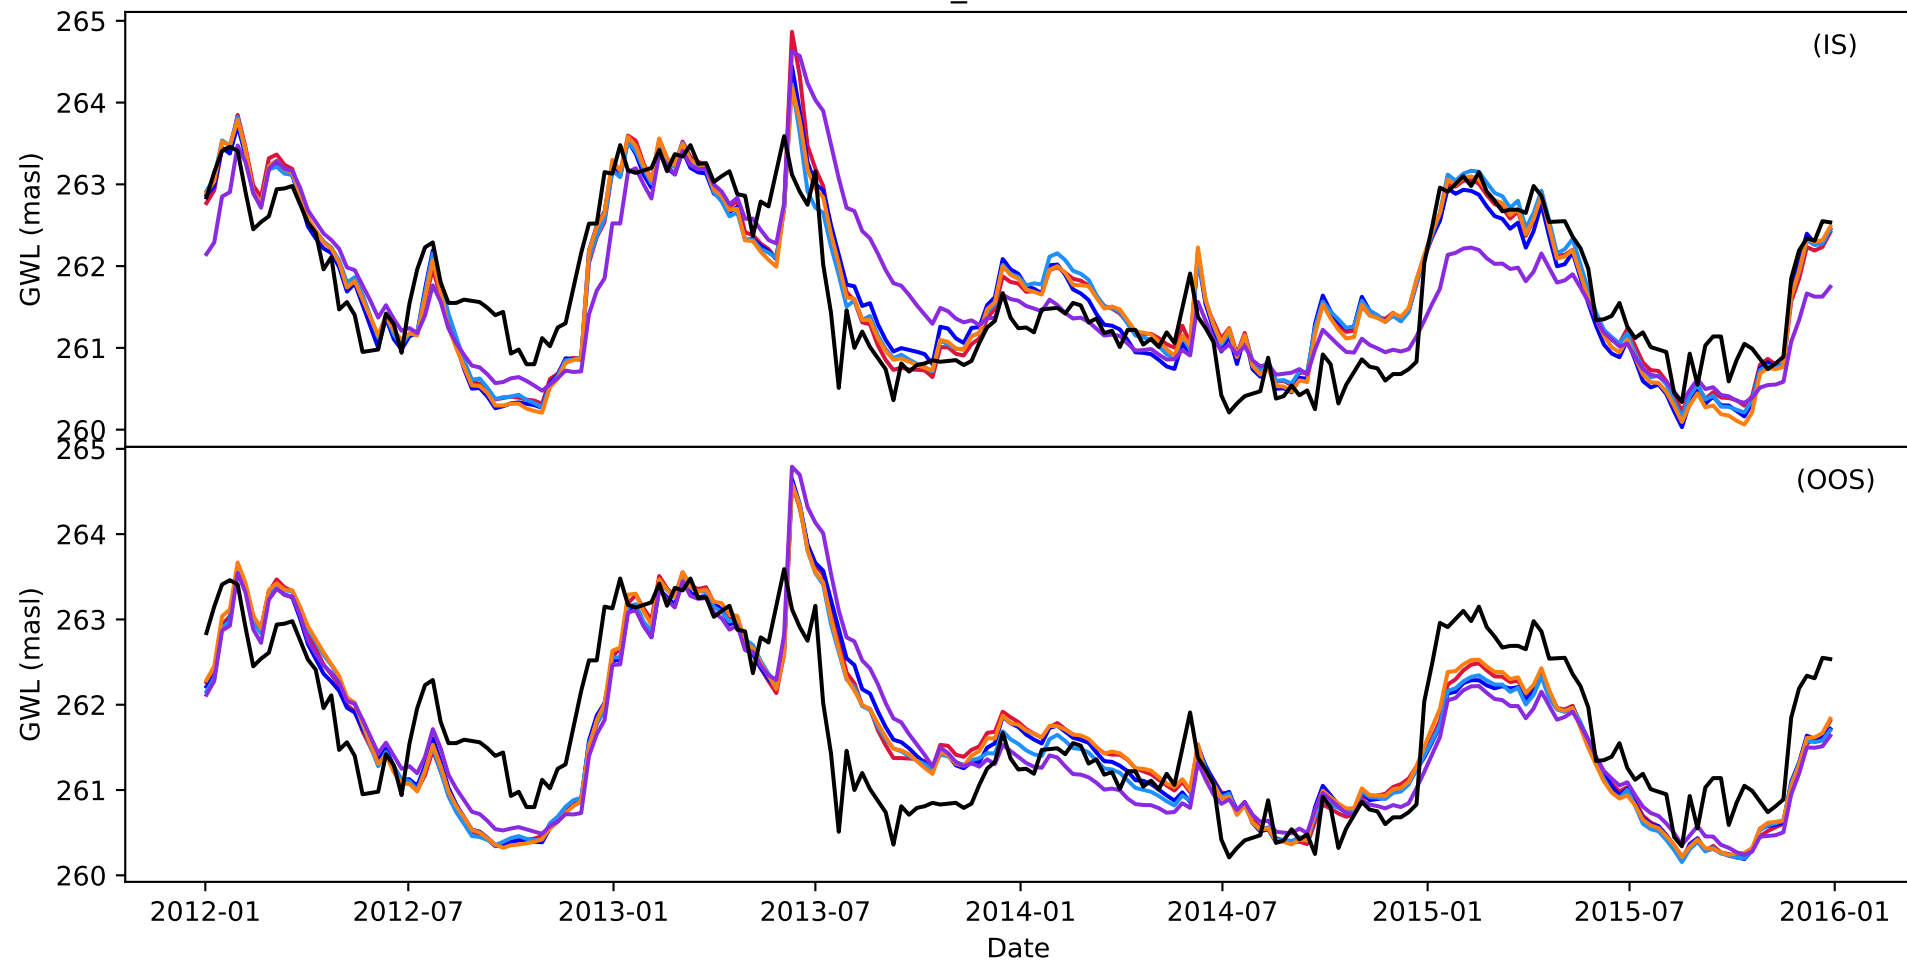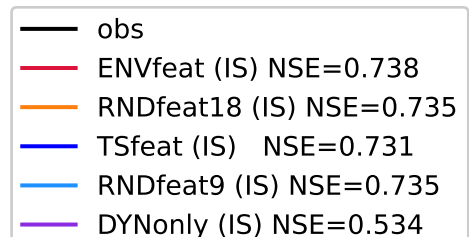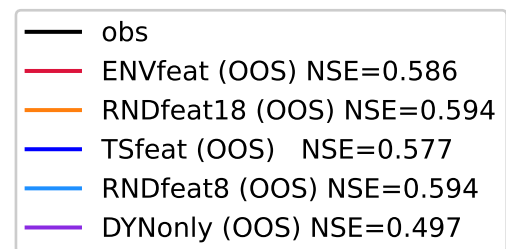

SN\_49484004

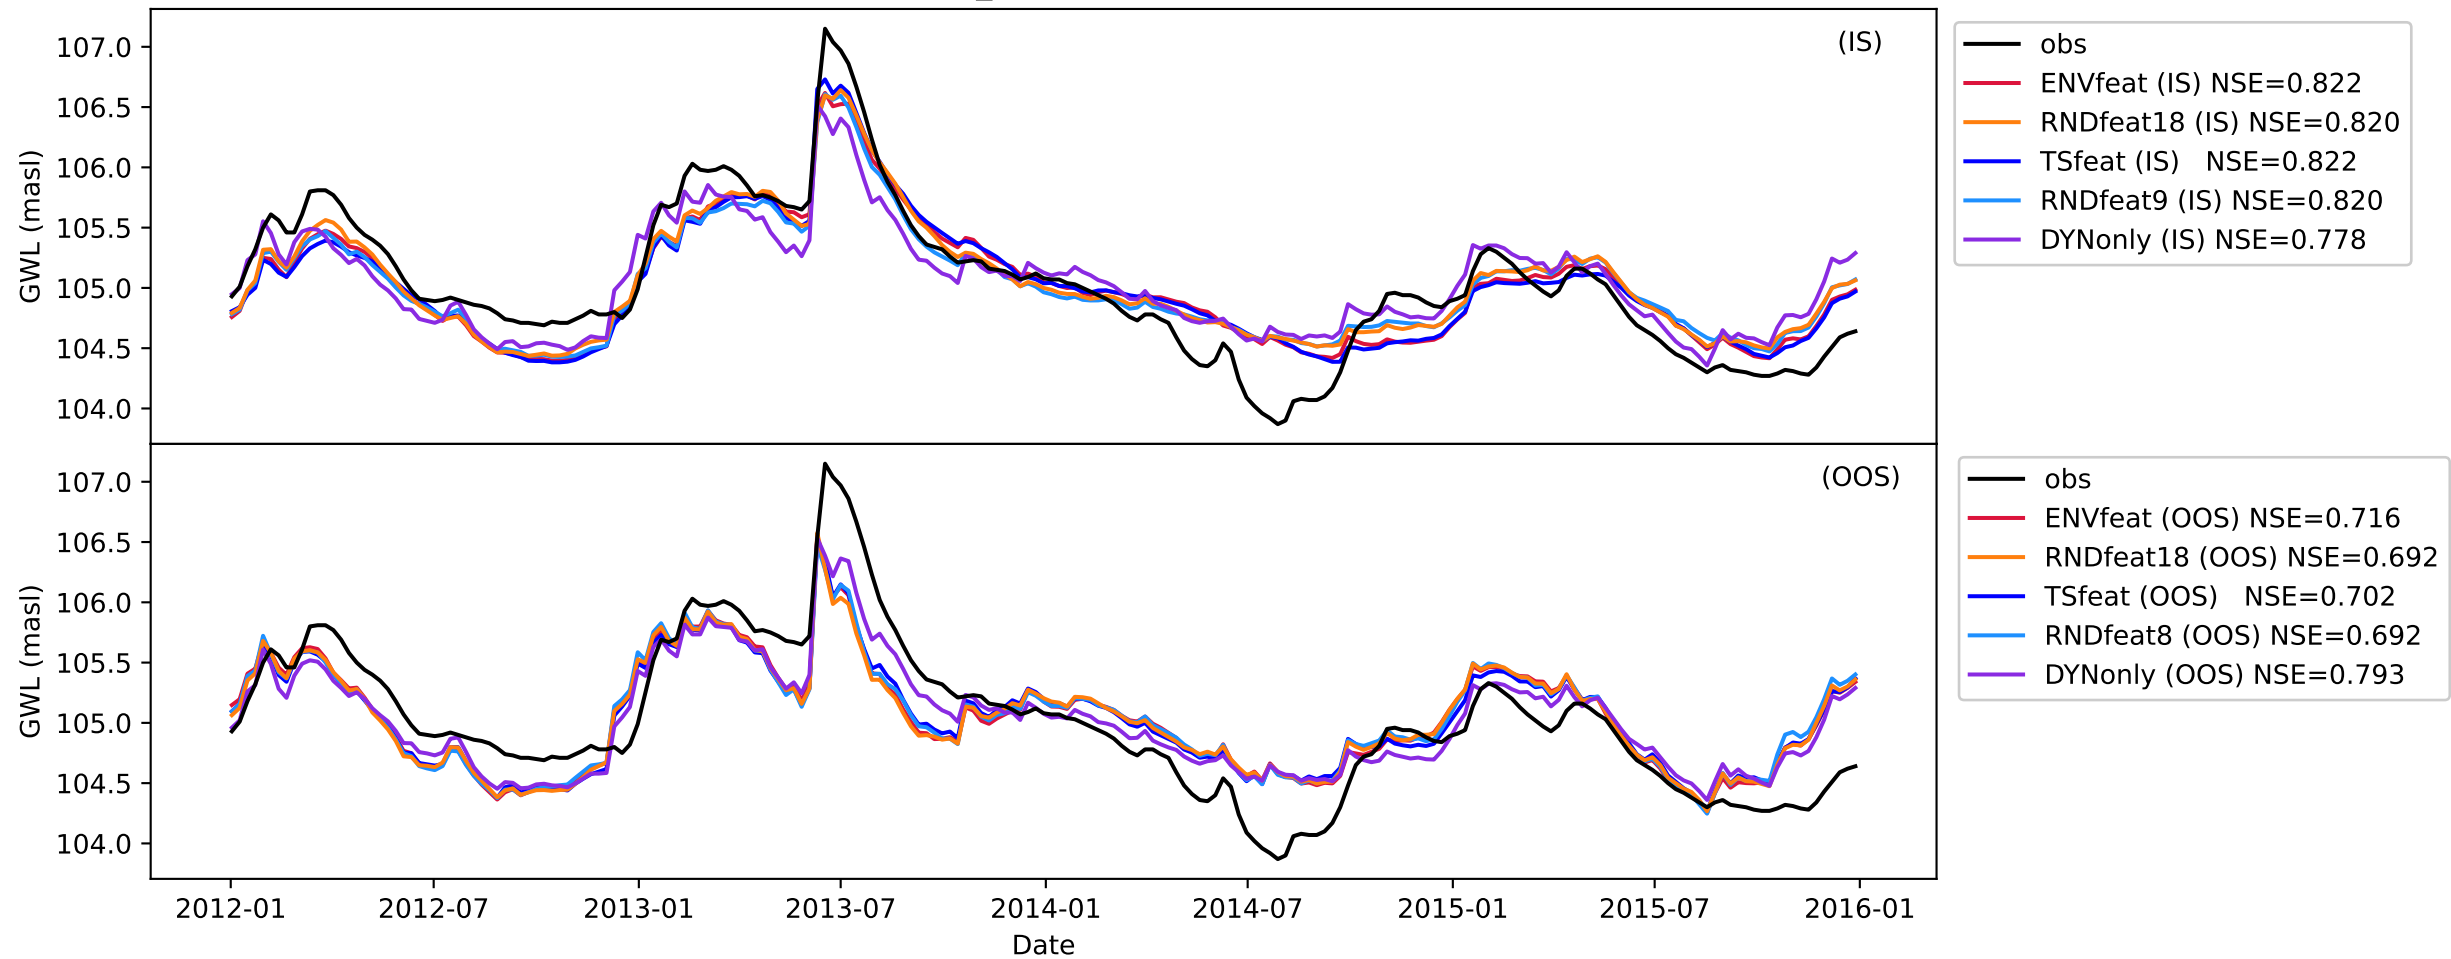

## SN\_49531740

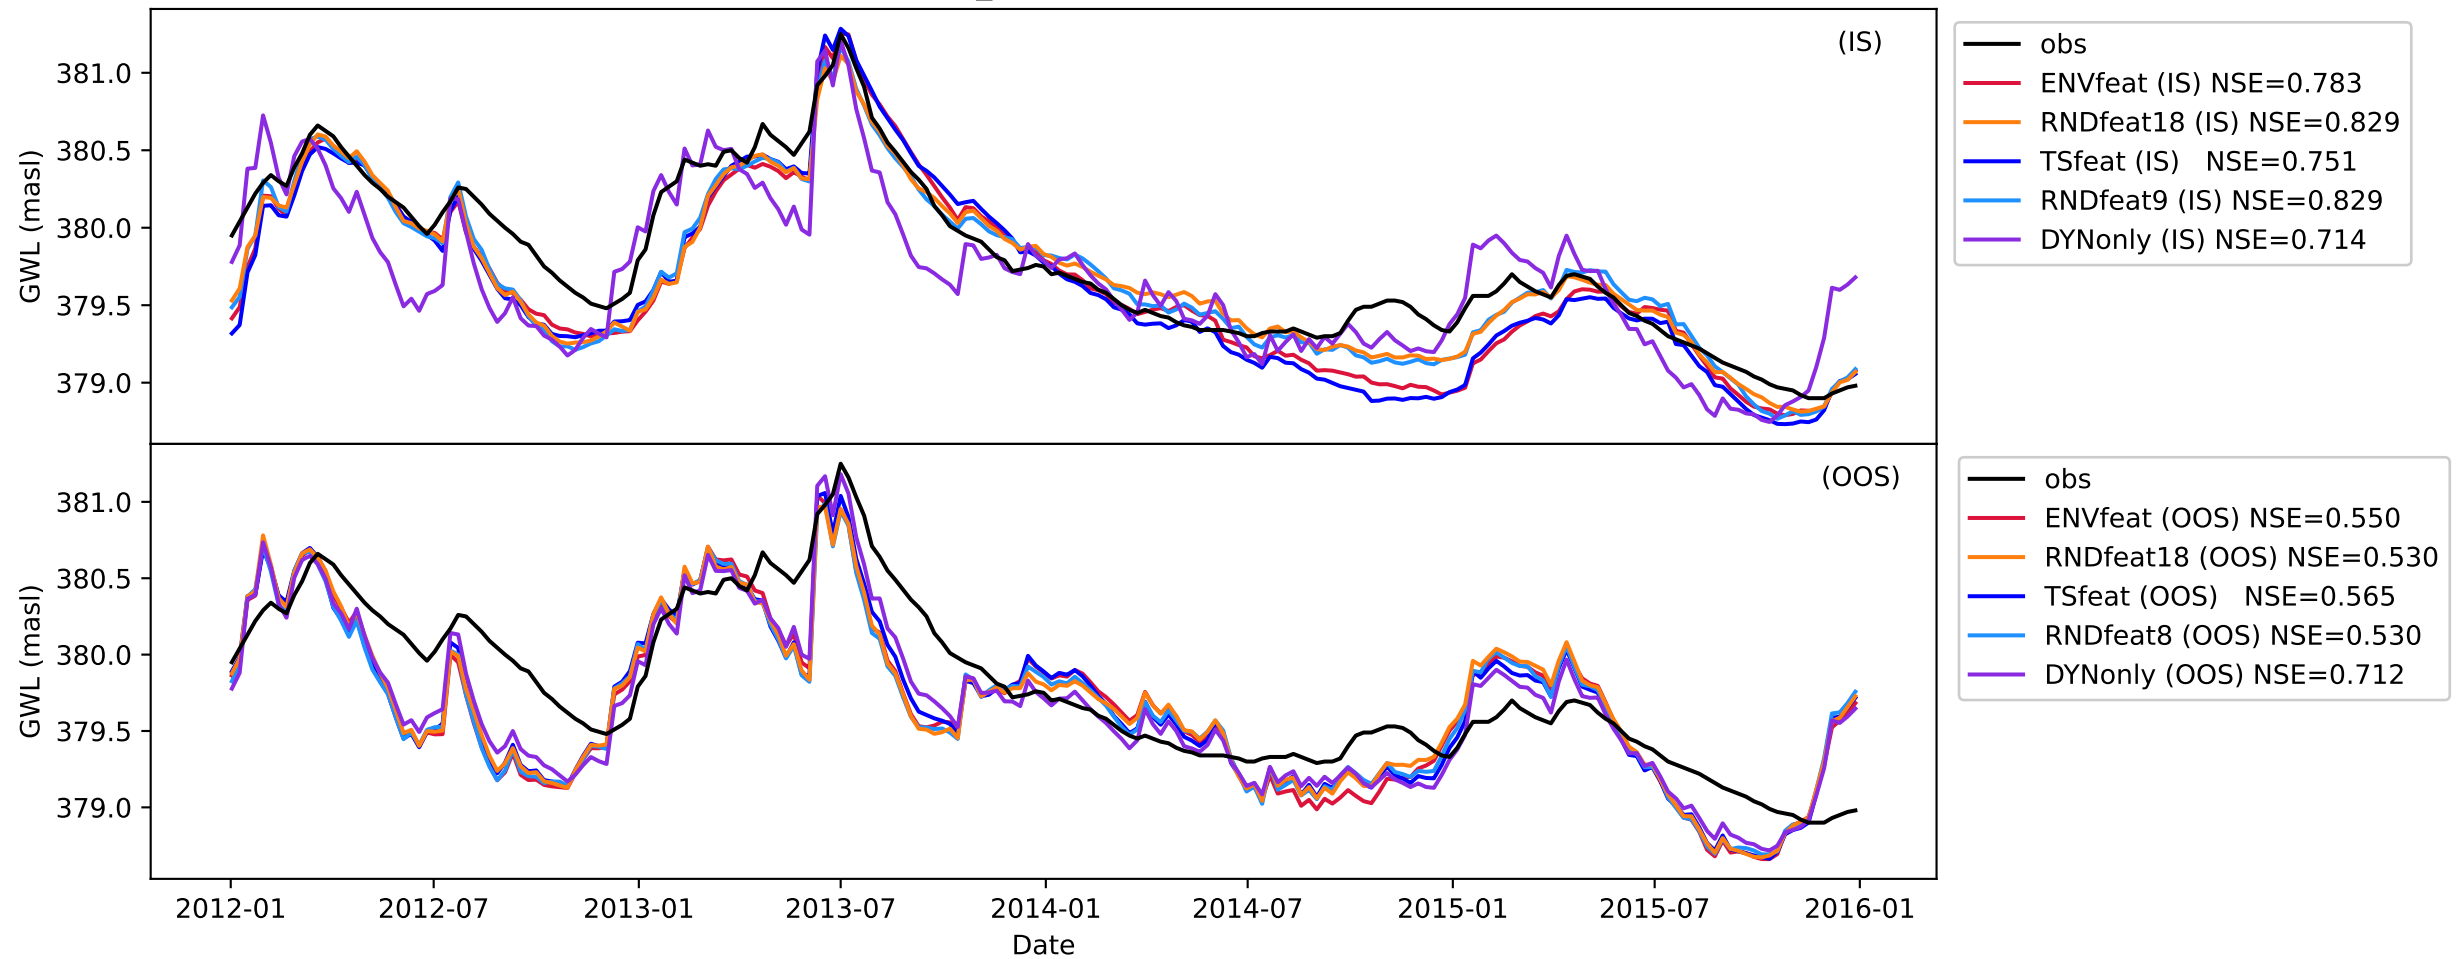

## SN\_52410759

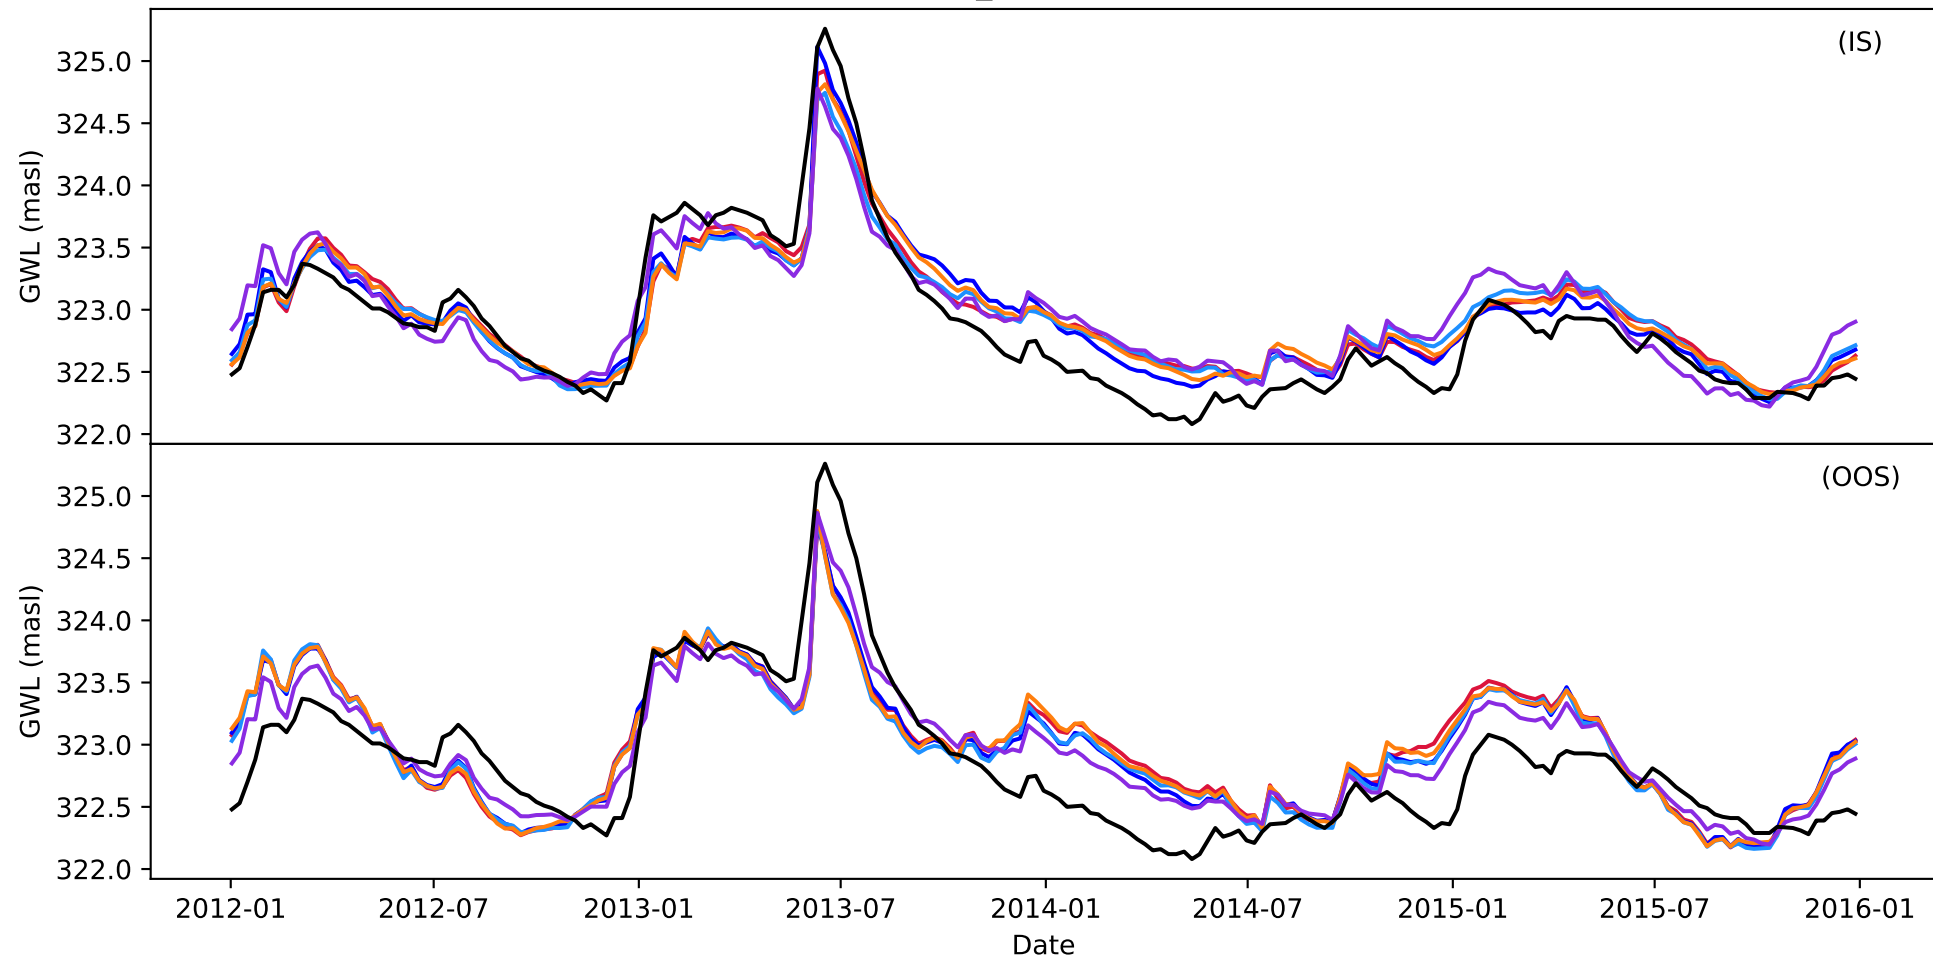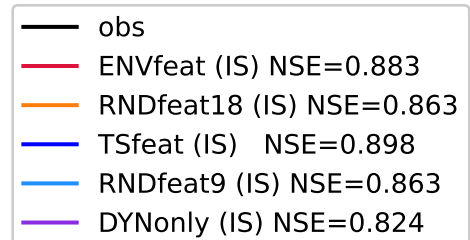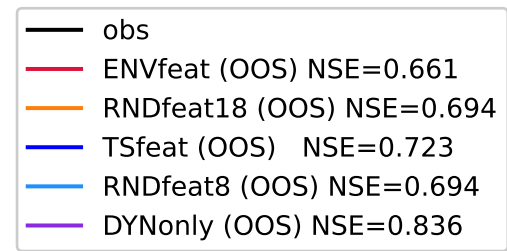

ST\_31340028

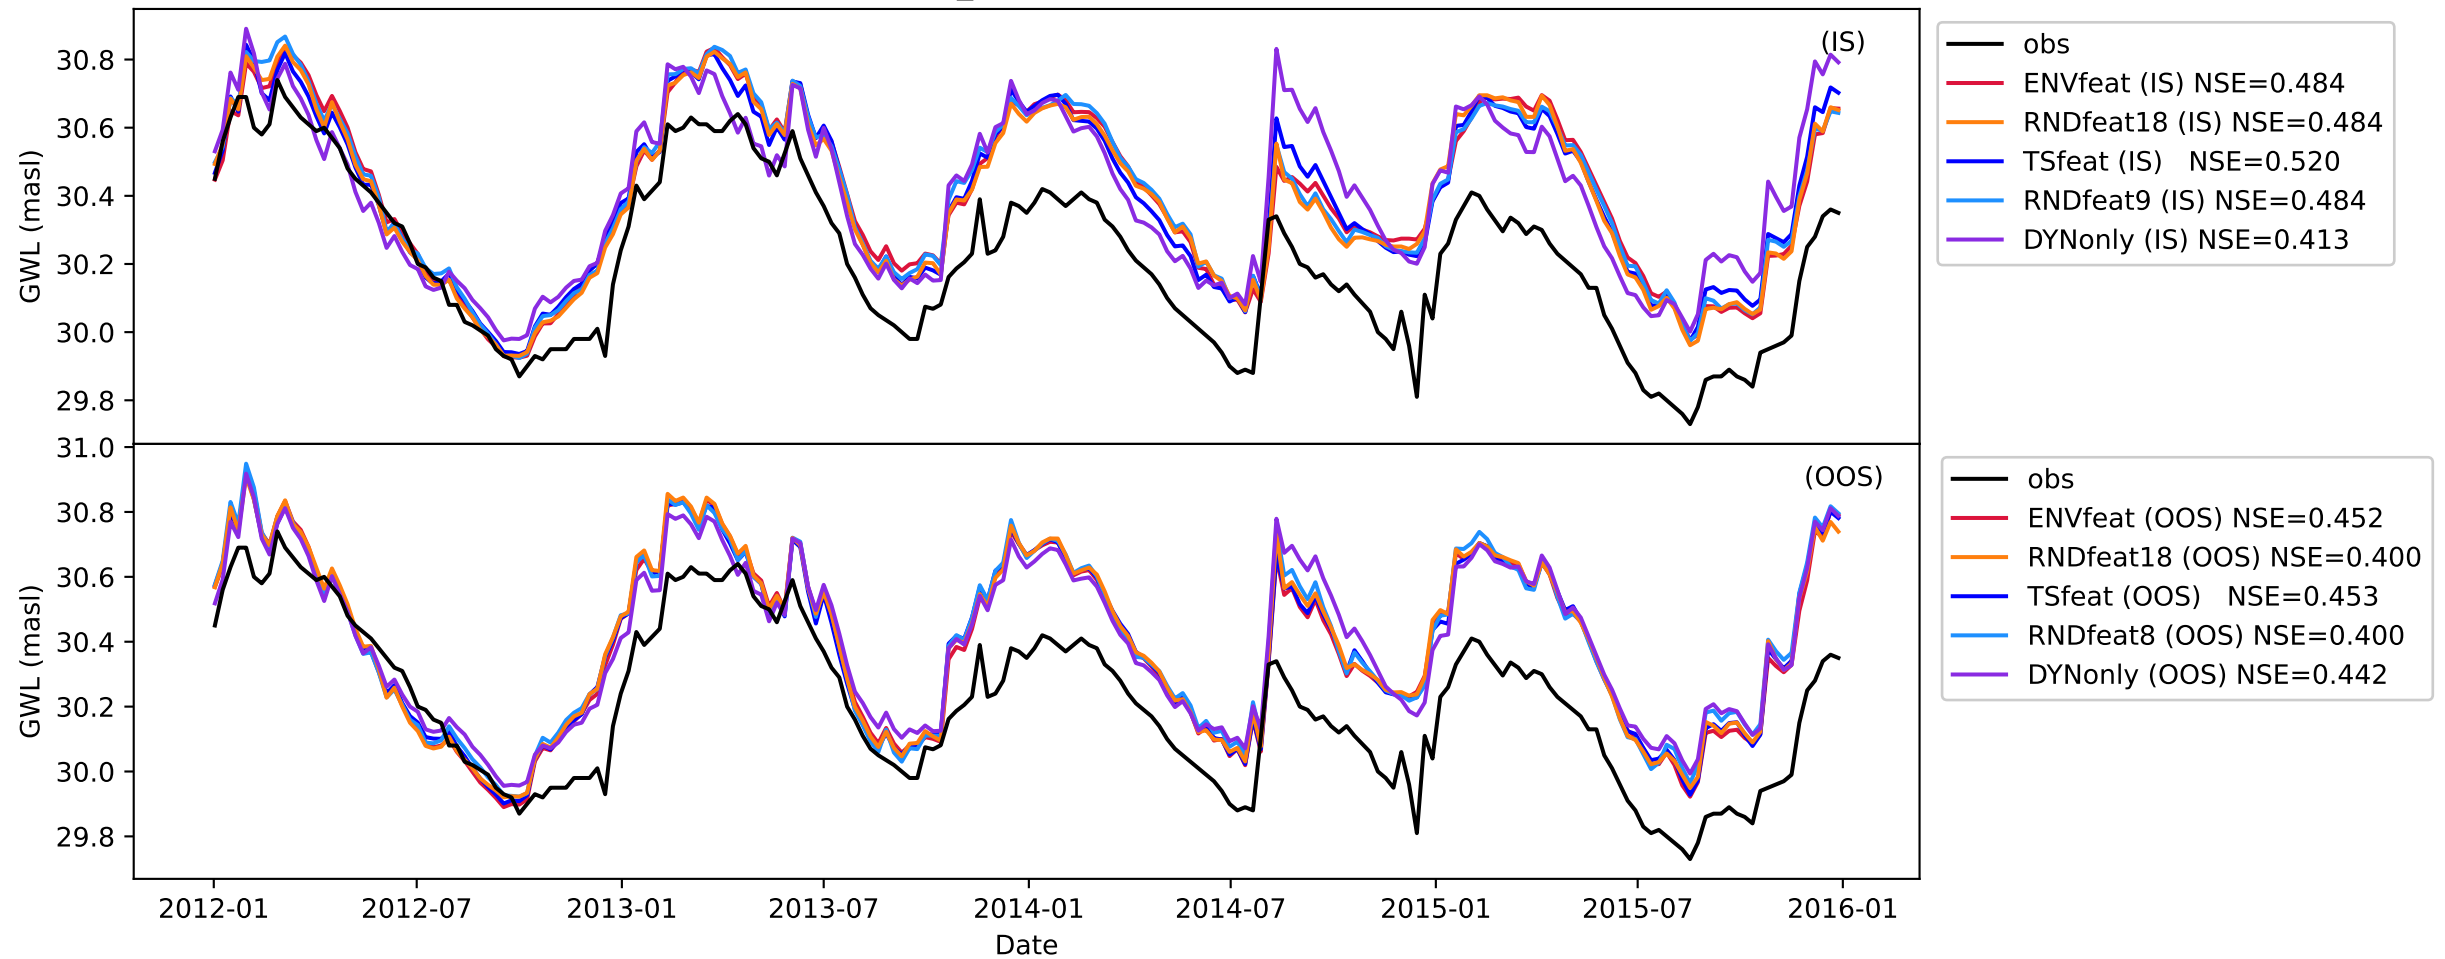

ST\_33340002

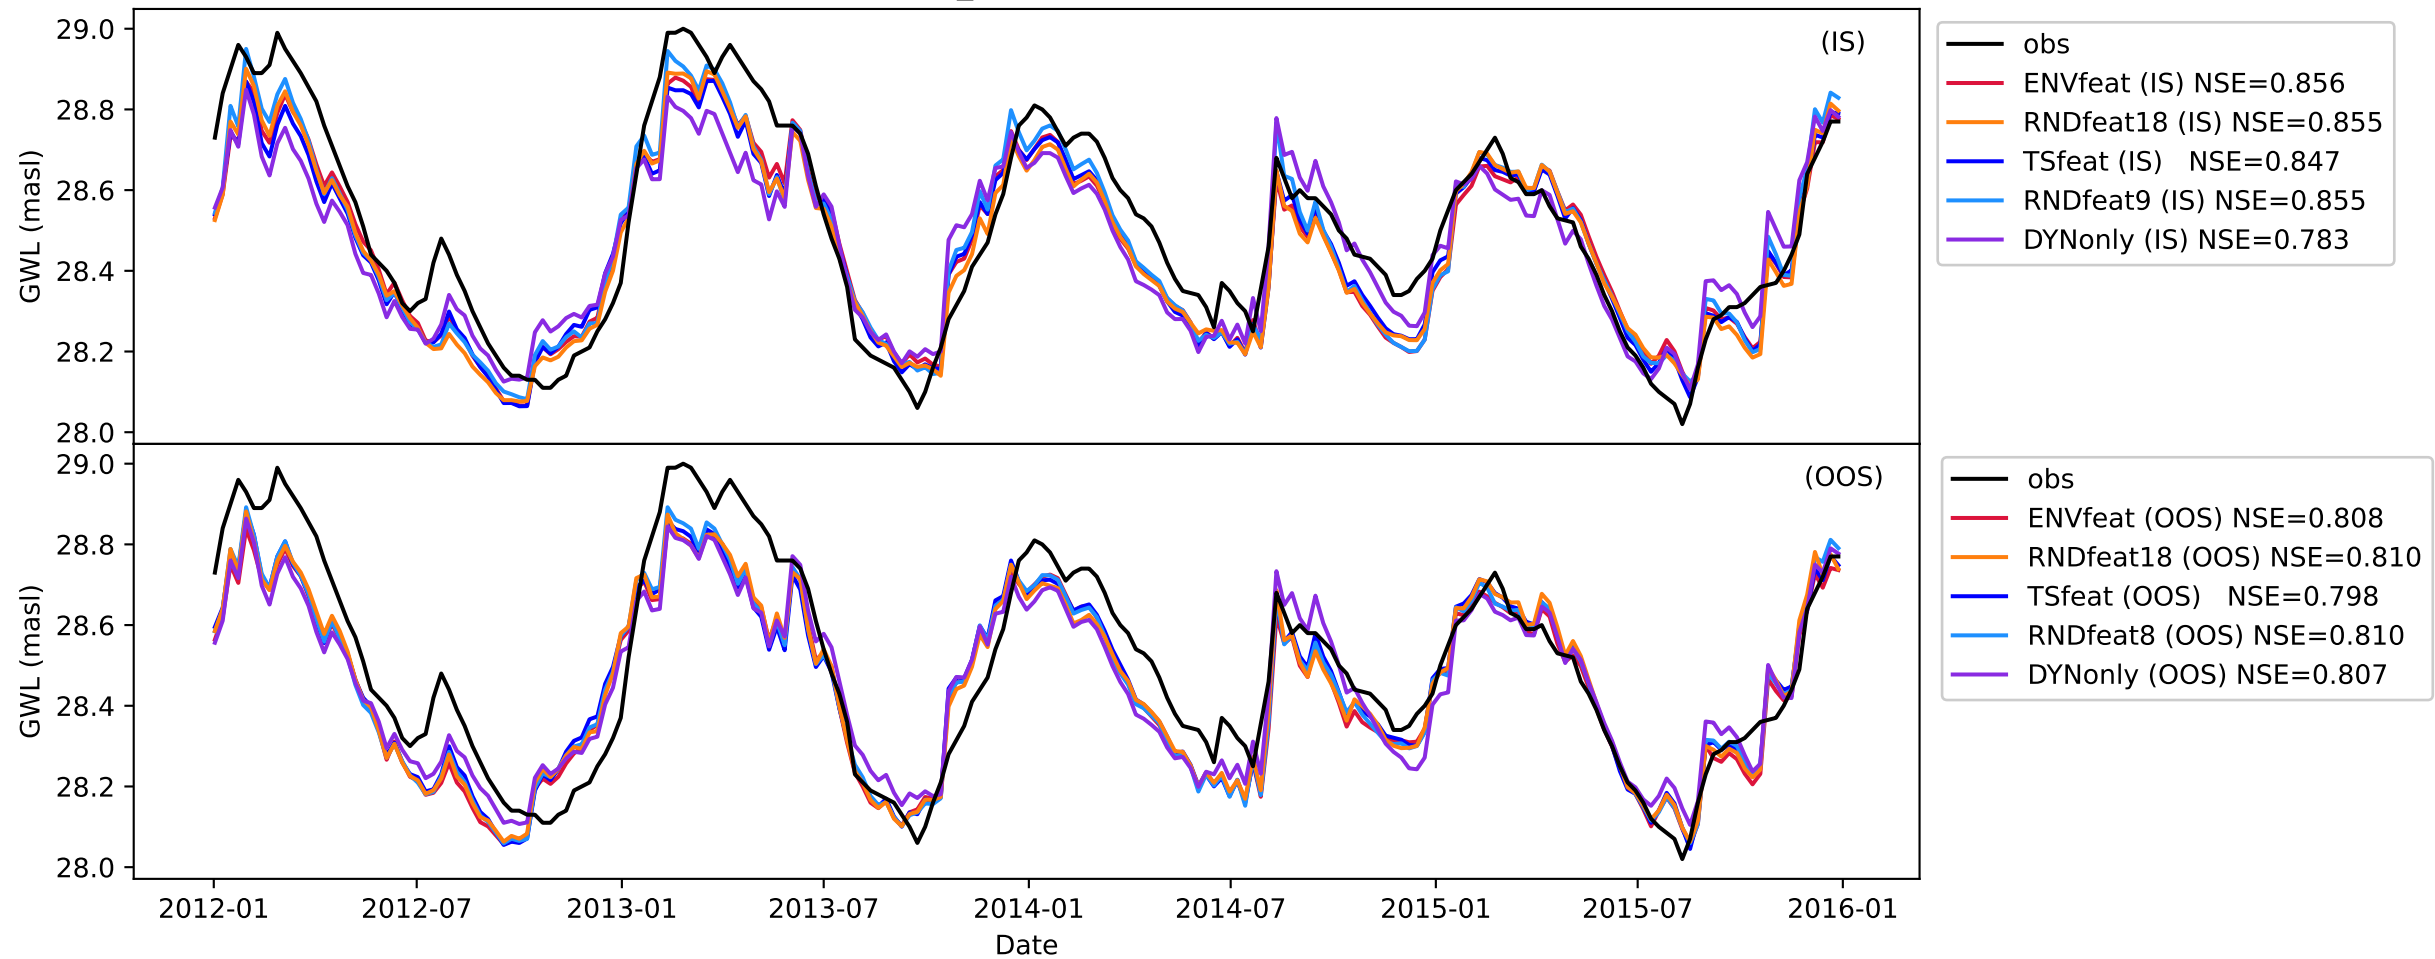

ST\_34376608

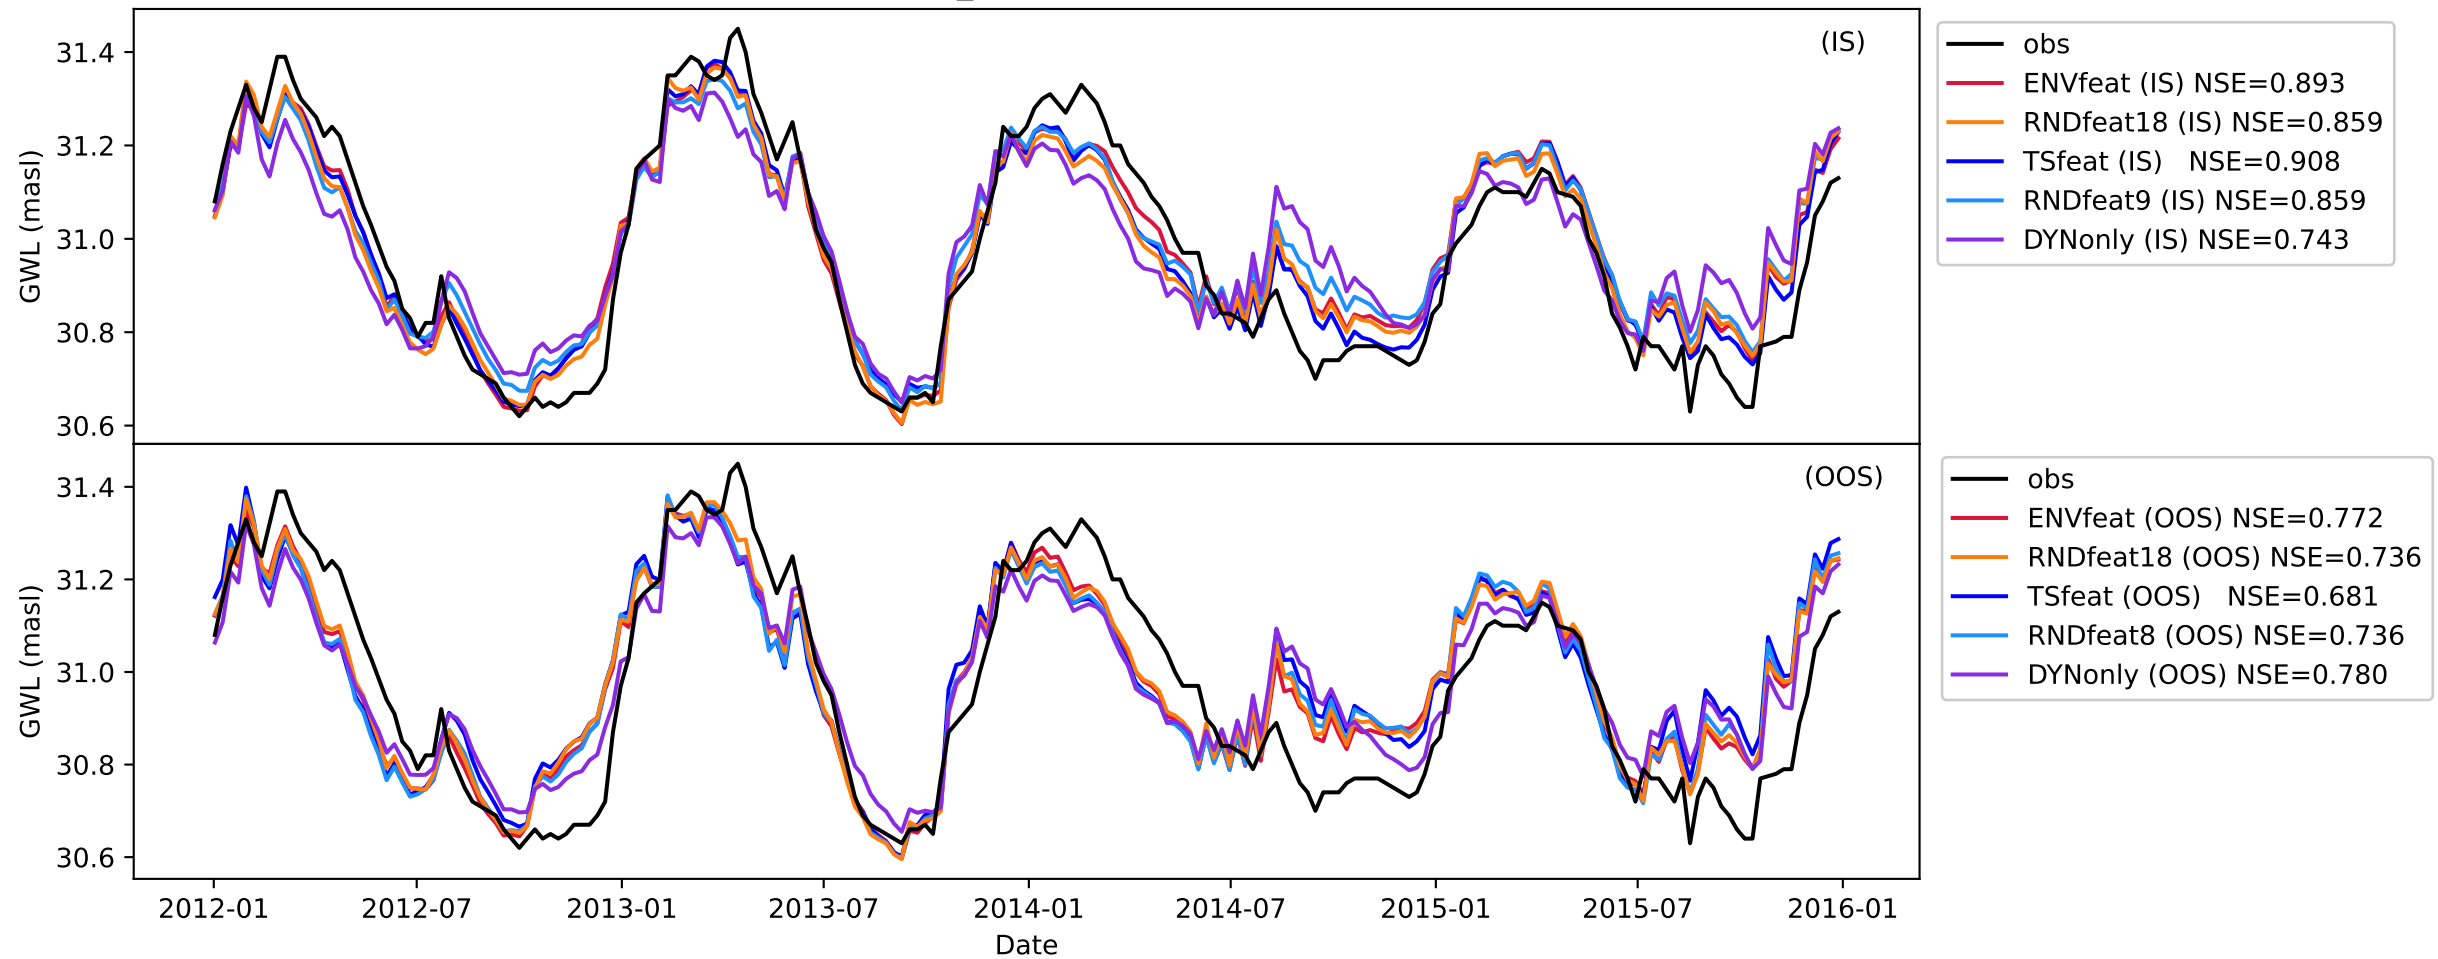



ST\_36340007

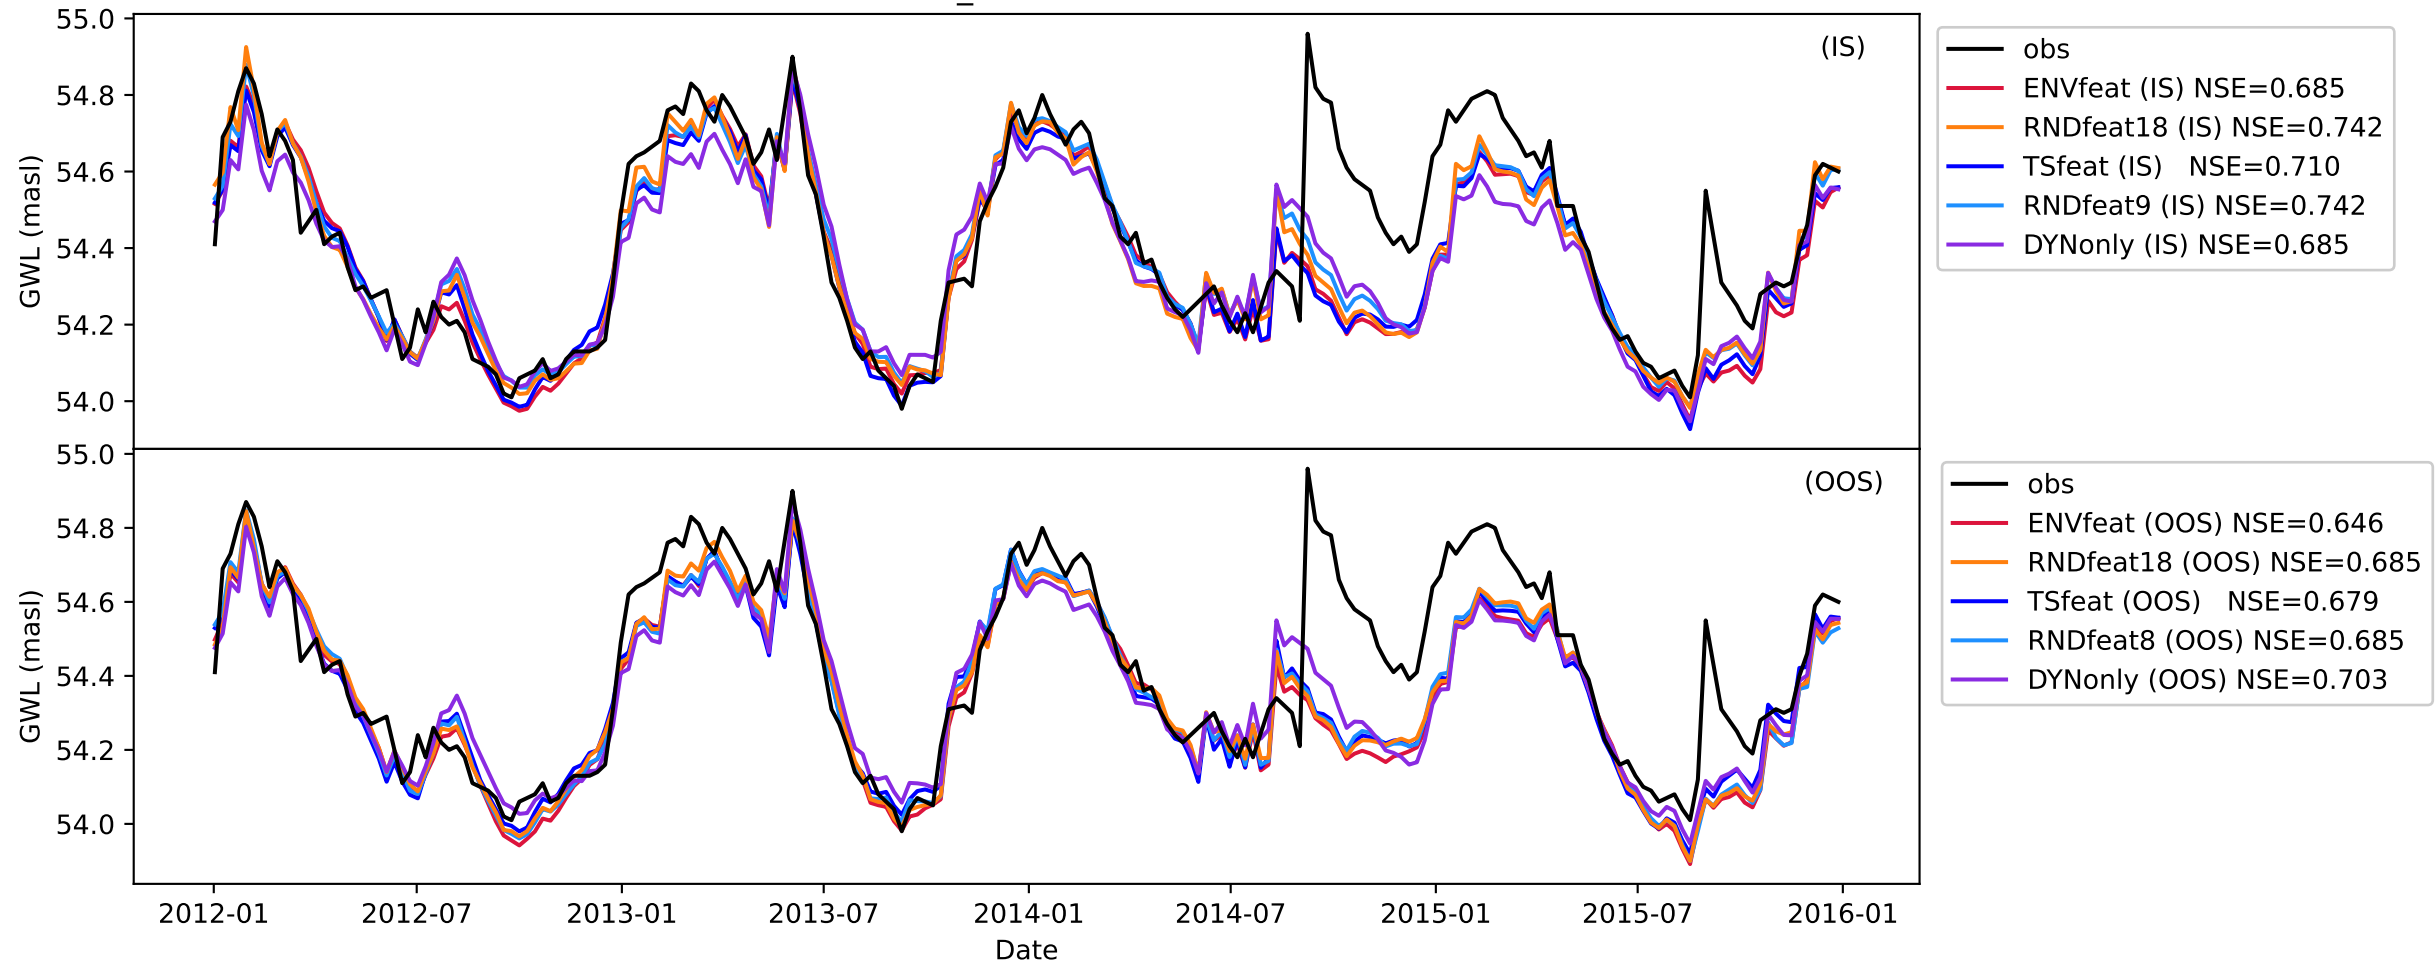

## ST\_39320023

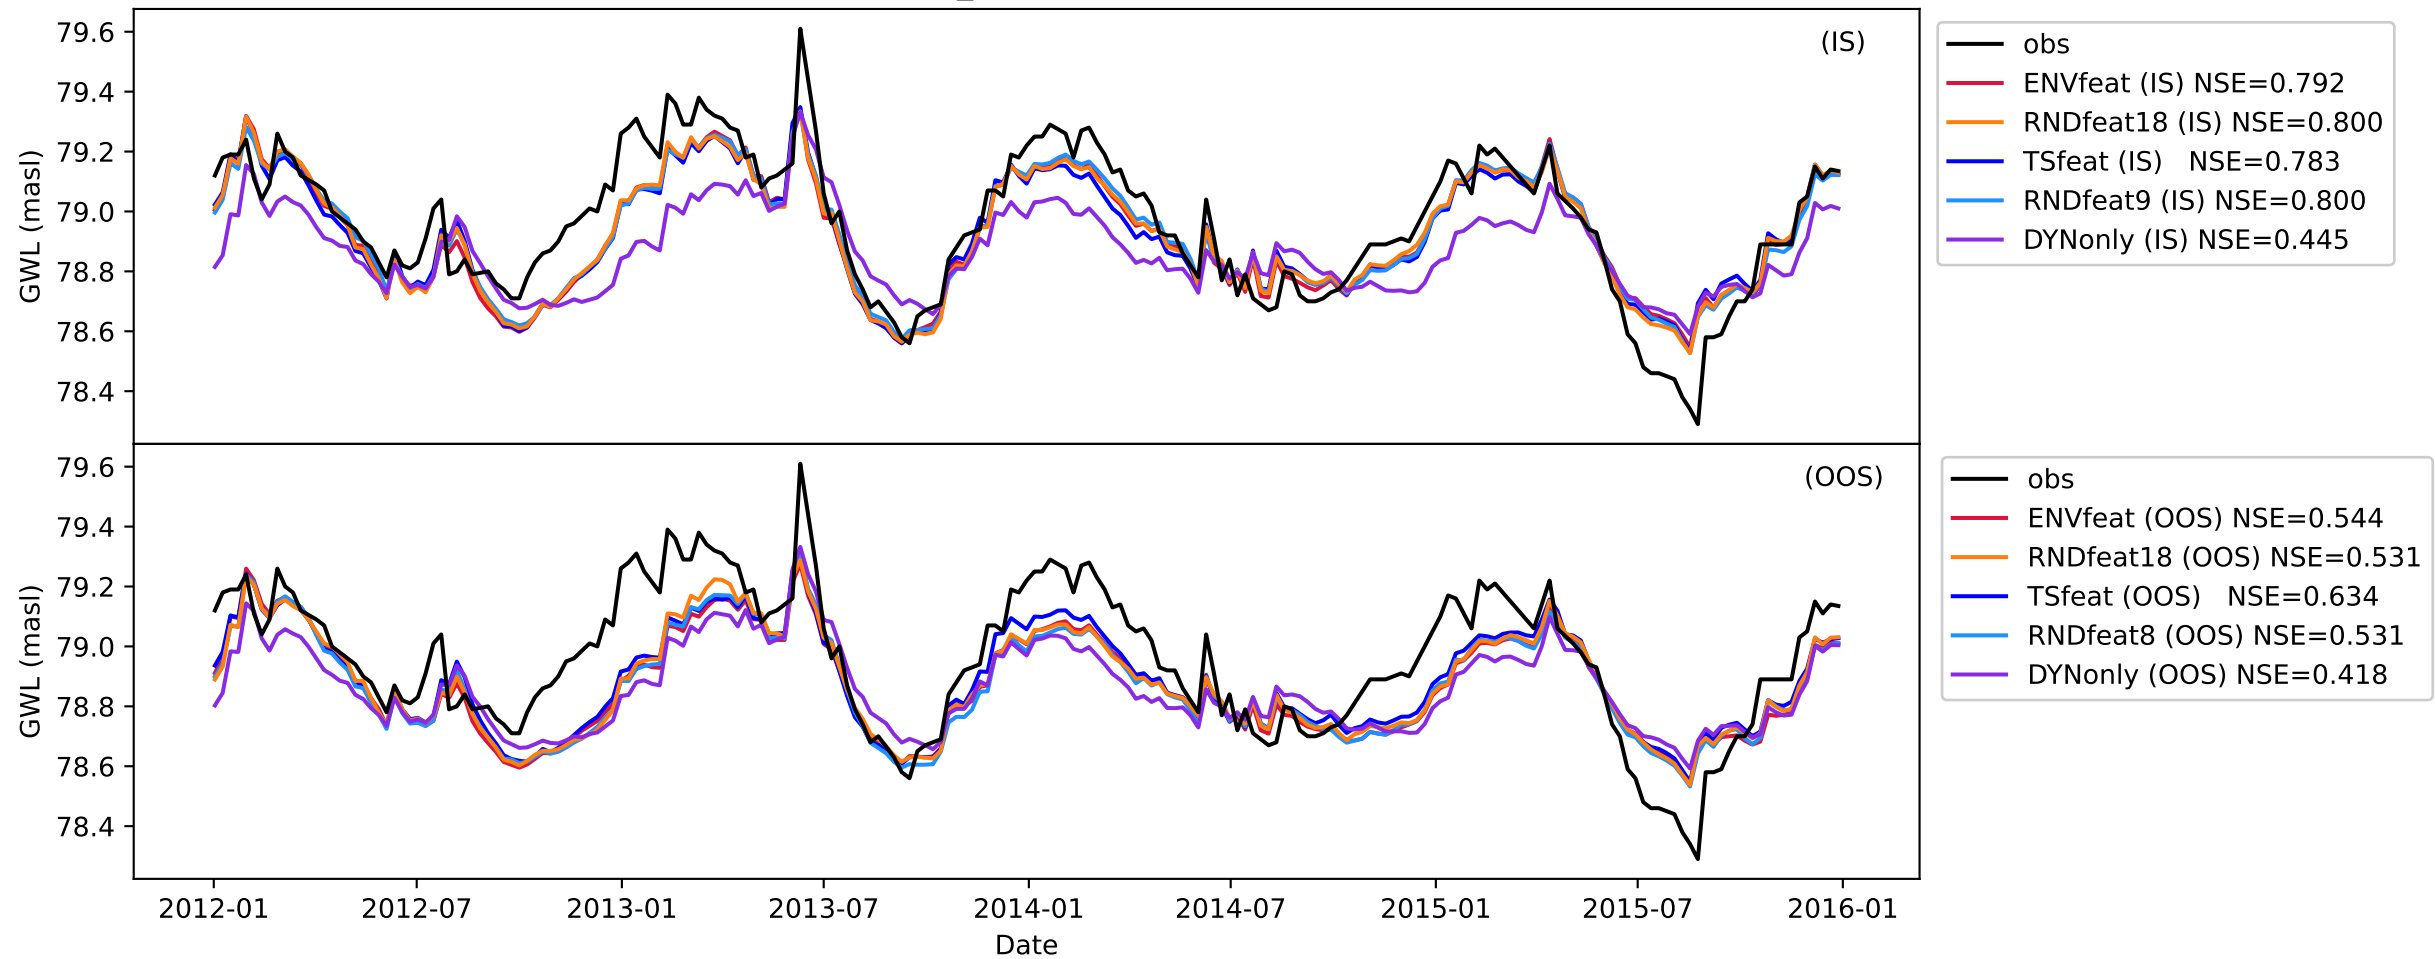

ST\_40415442

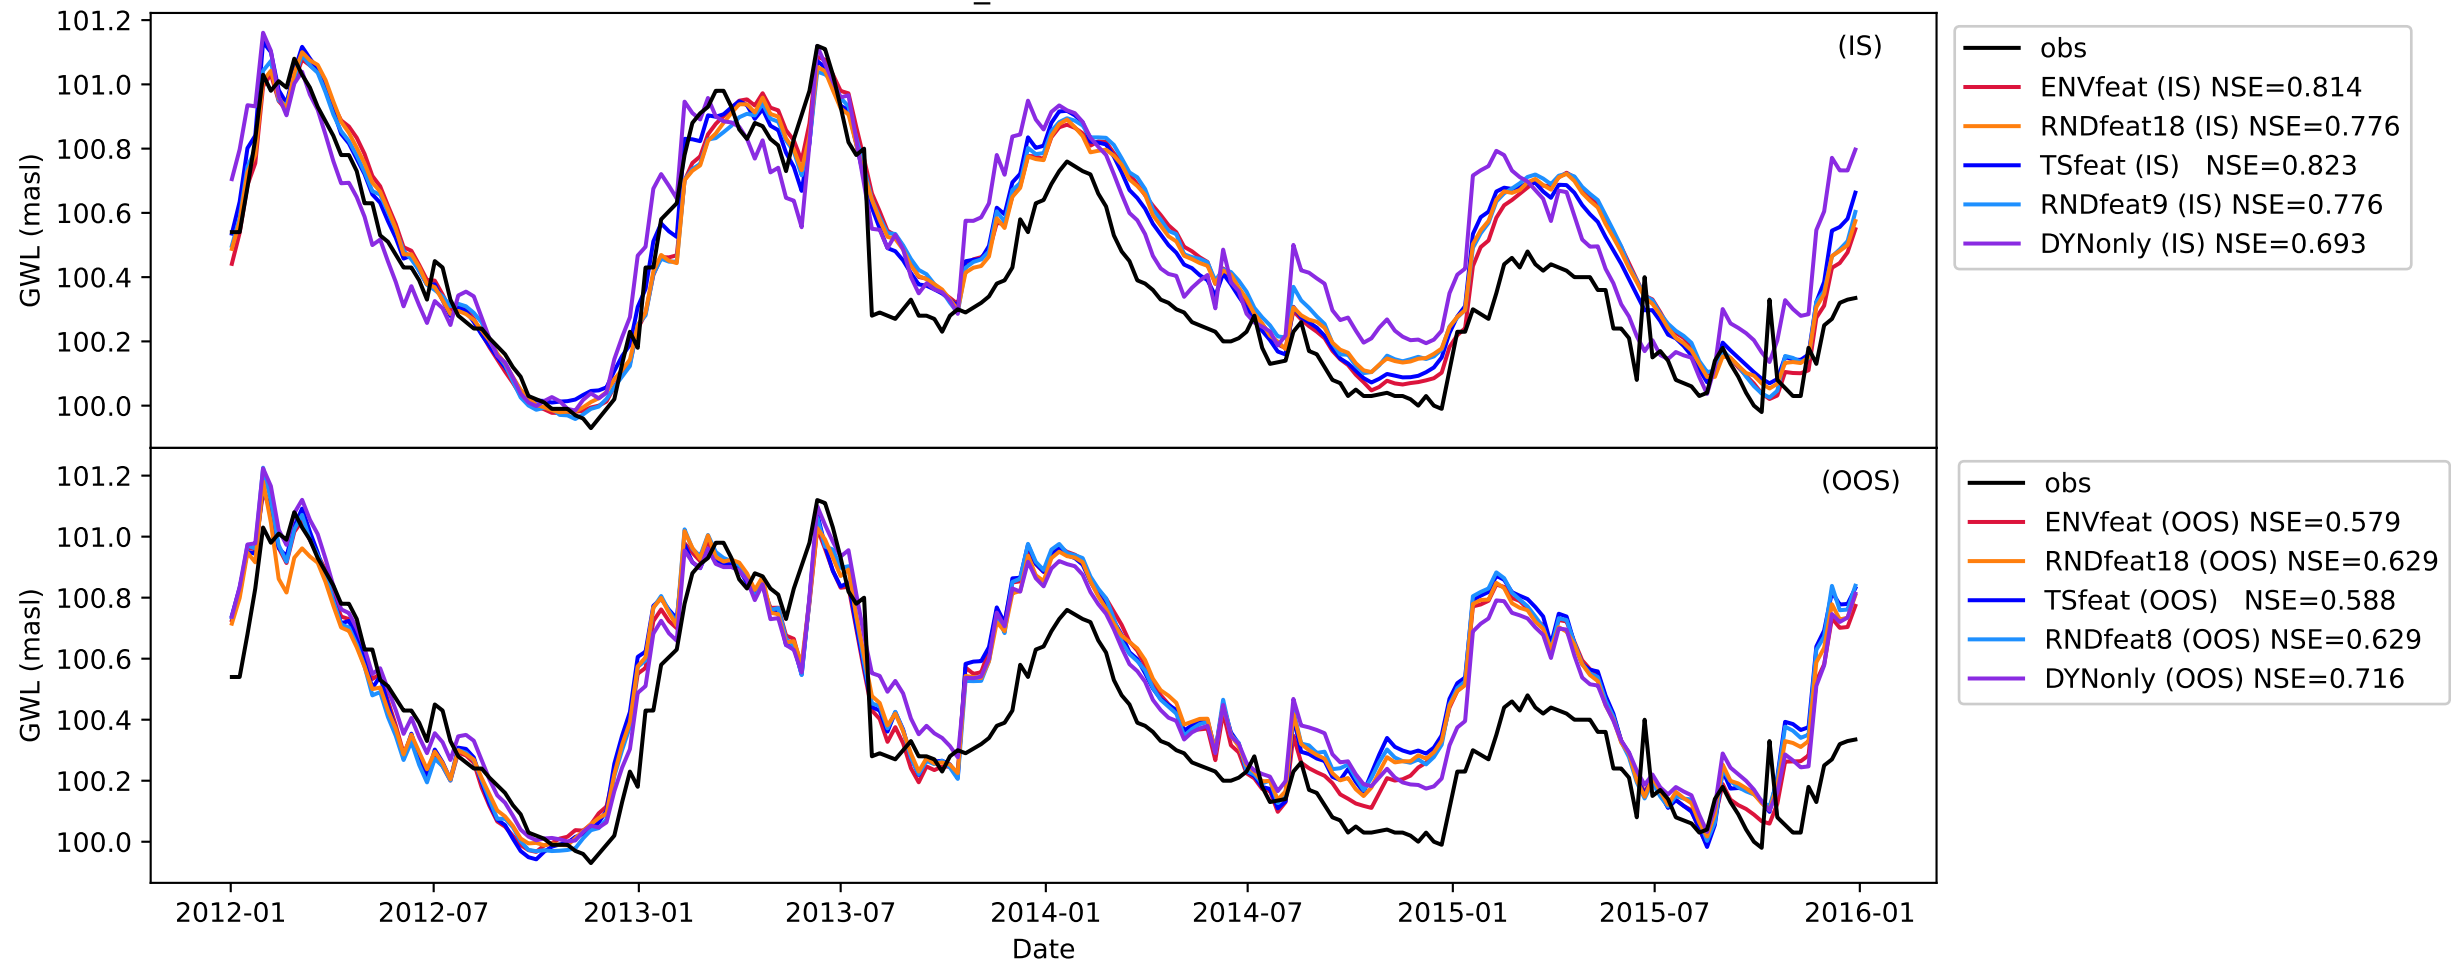

## ST\_43435116

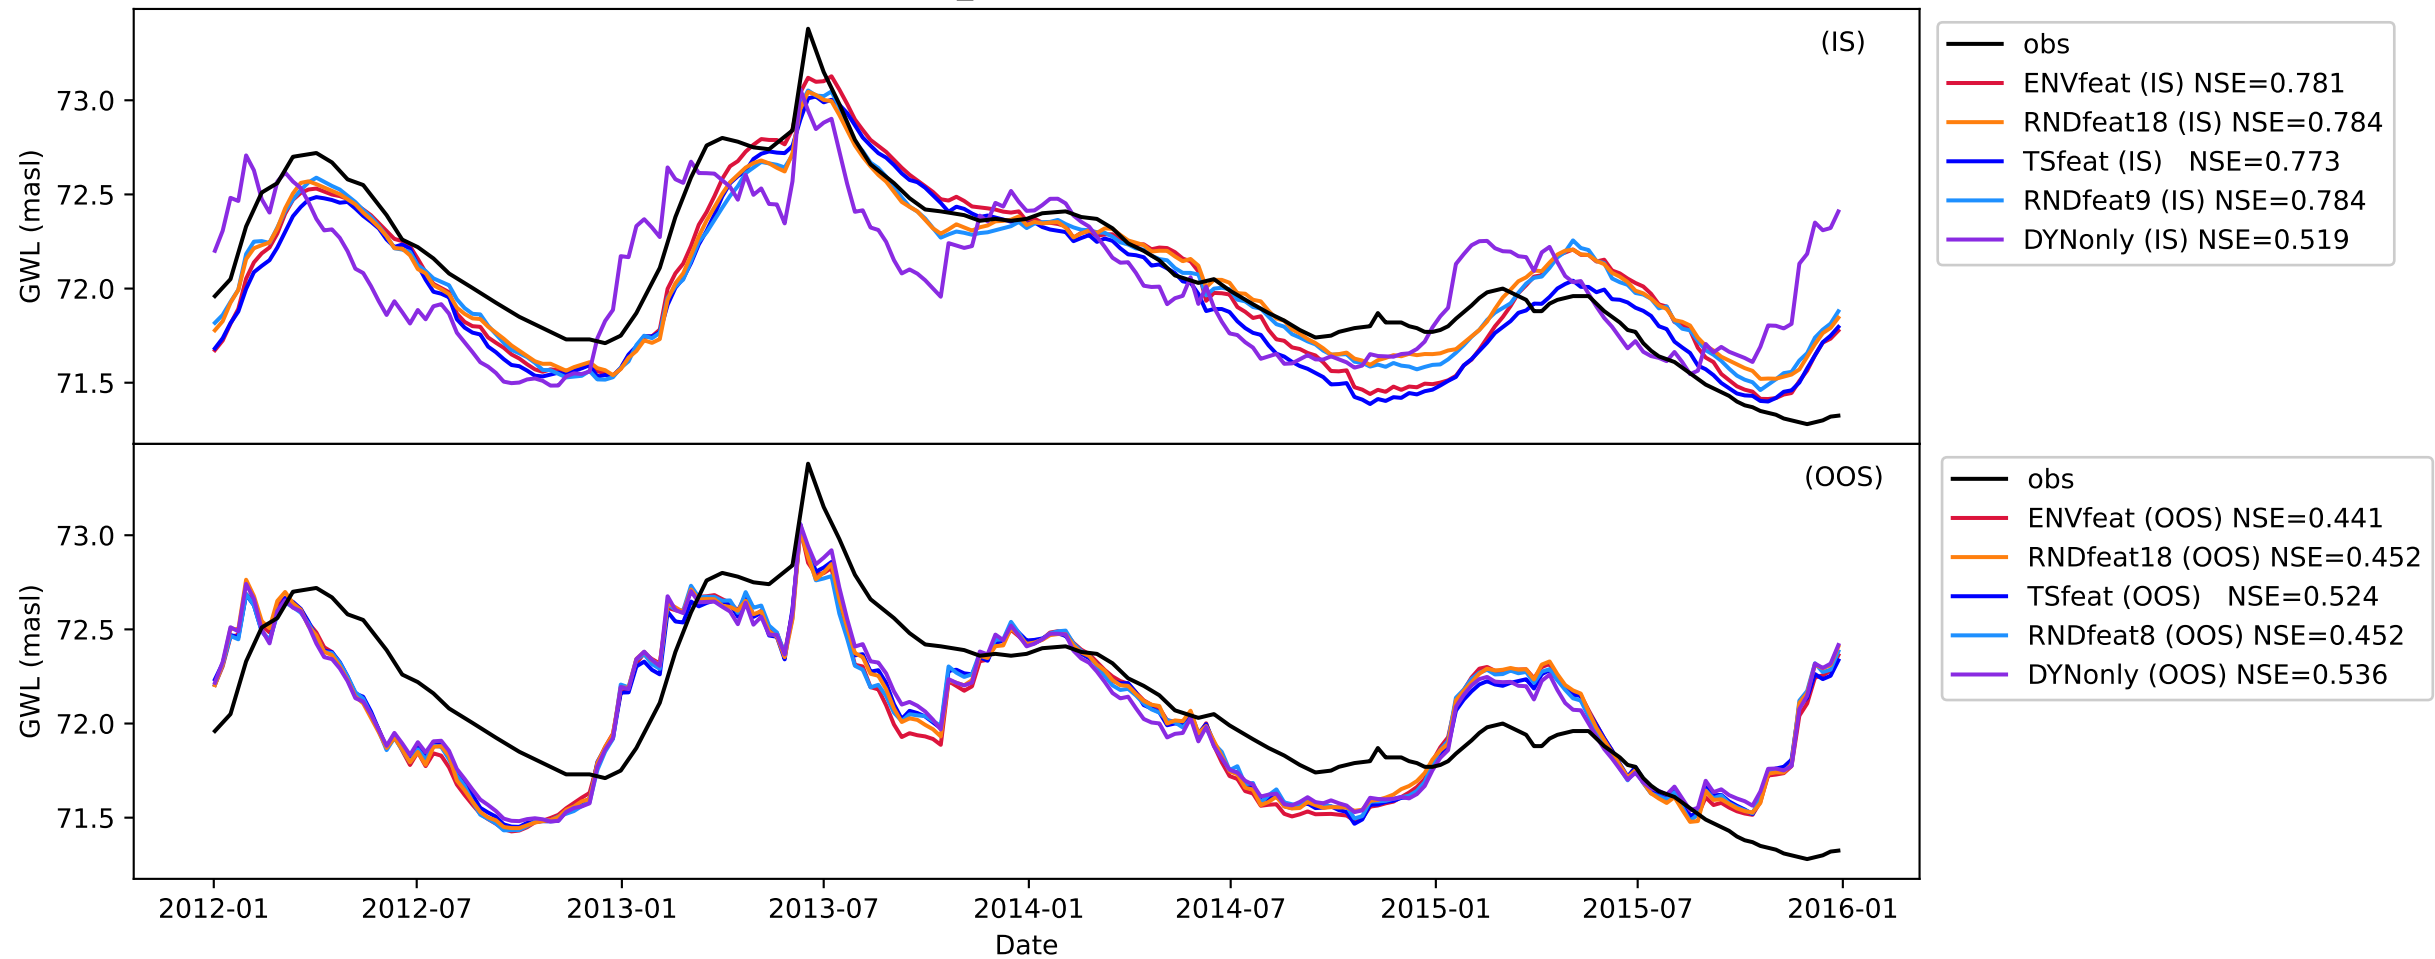

## ST\_44339213

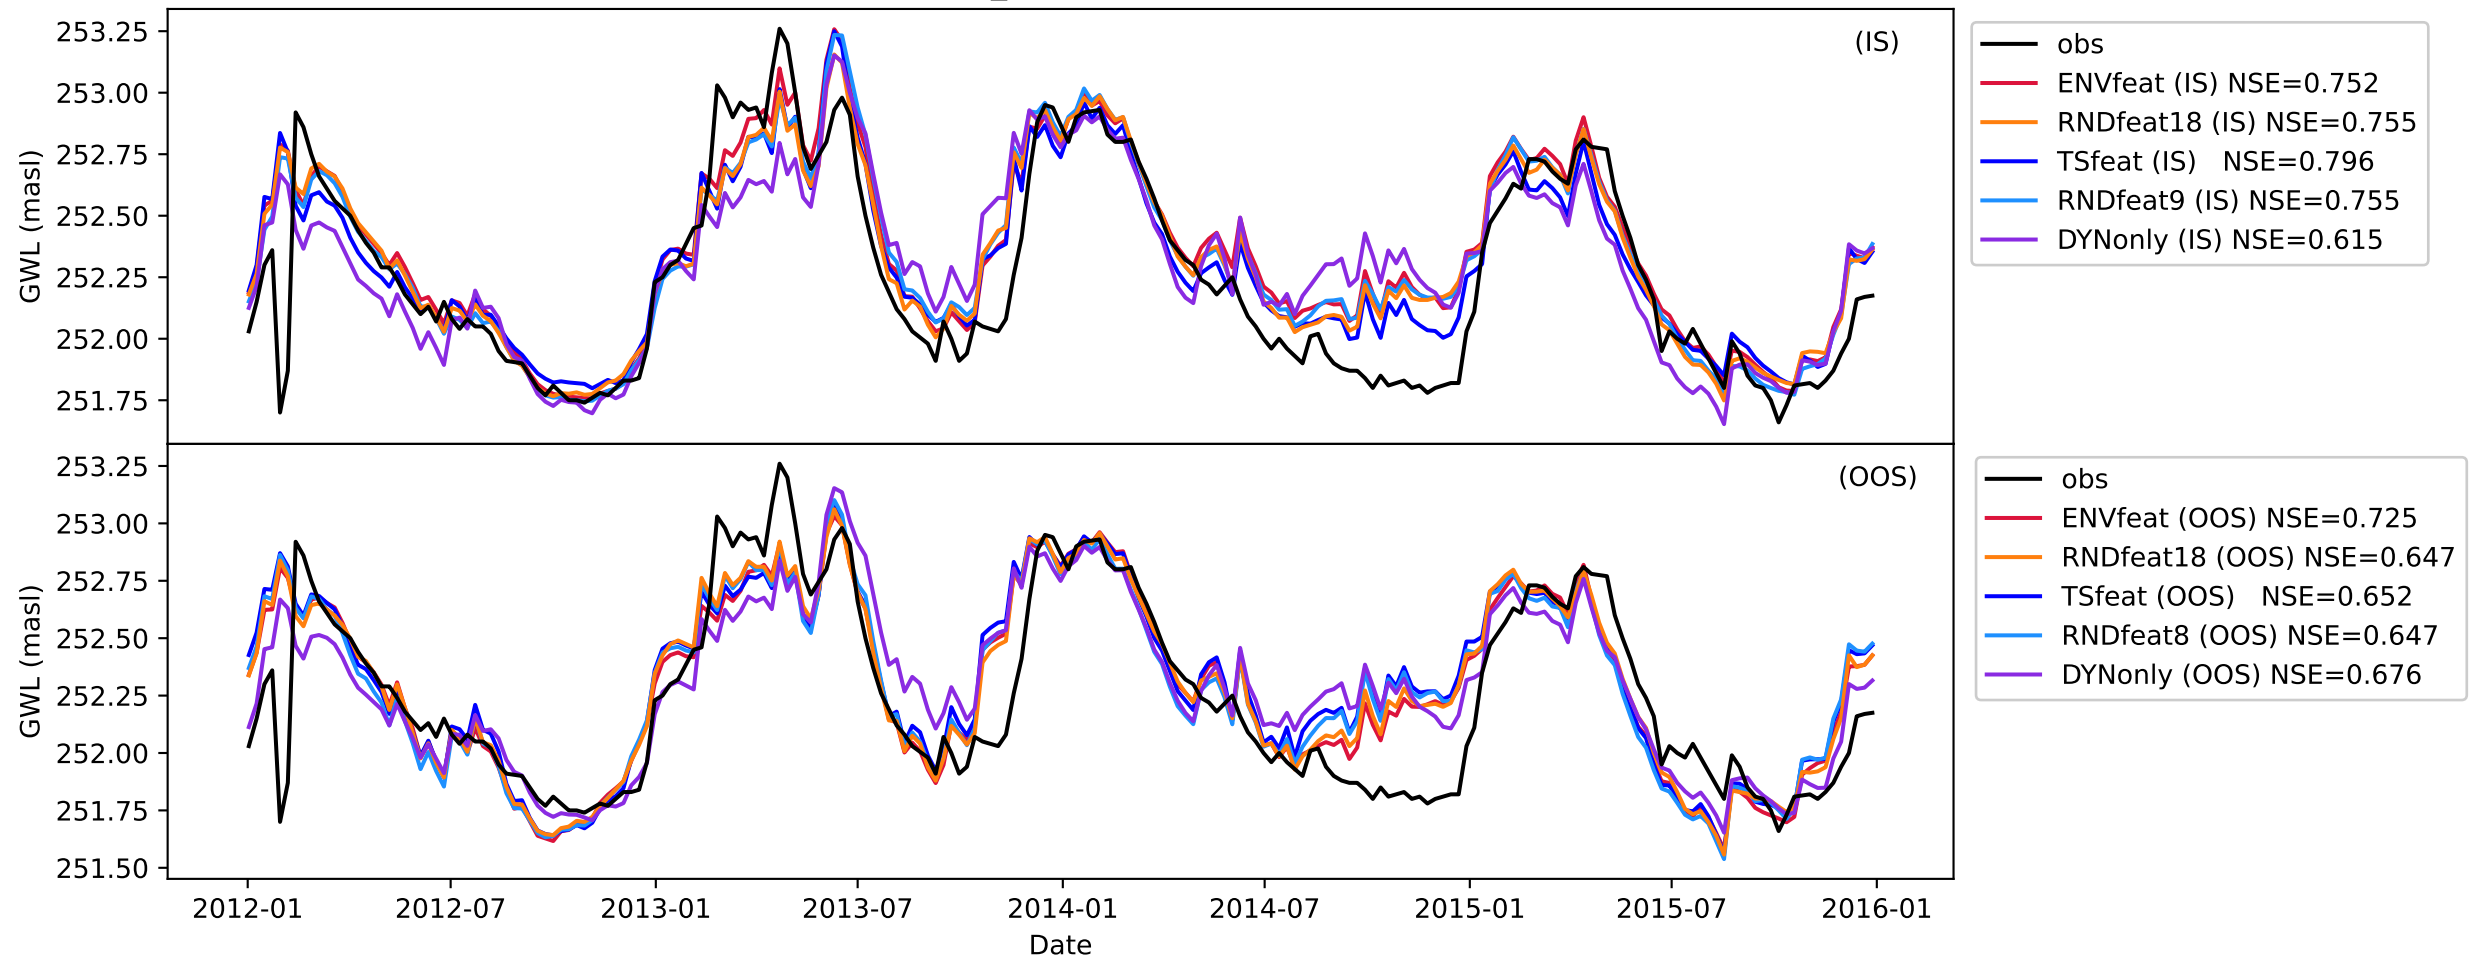

Supplement: Supplementary file 1 [file hess-2023-192-supplement.pdf]
